# Supplementary material for: gCAnno: a graph-based single cell type annotation method
Source: PubMed Central journal article supplement (PMC7686723; doi:10.1186/s12864-020-07223-4), 2020-11-23

# Liver

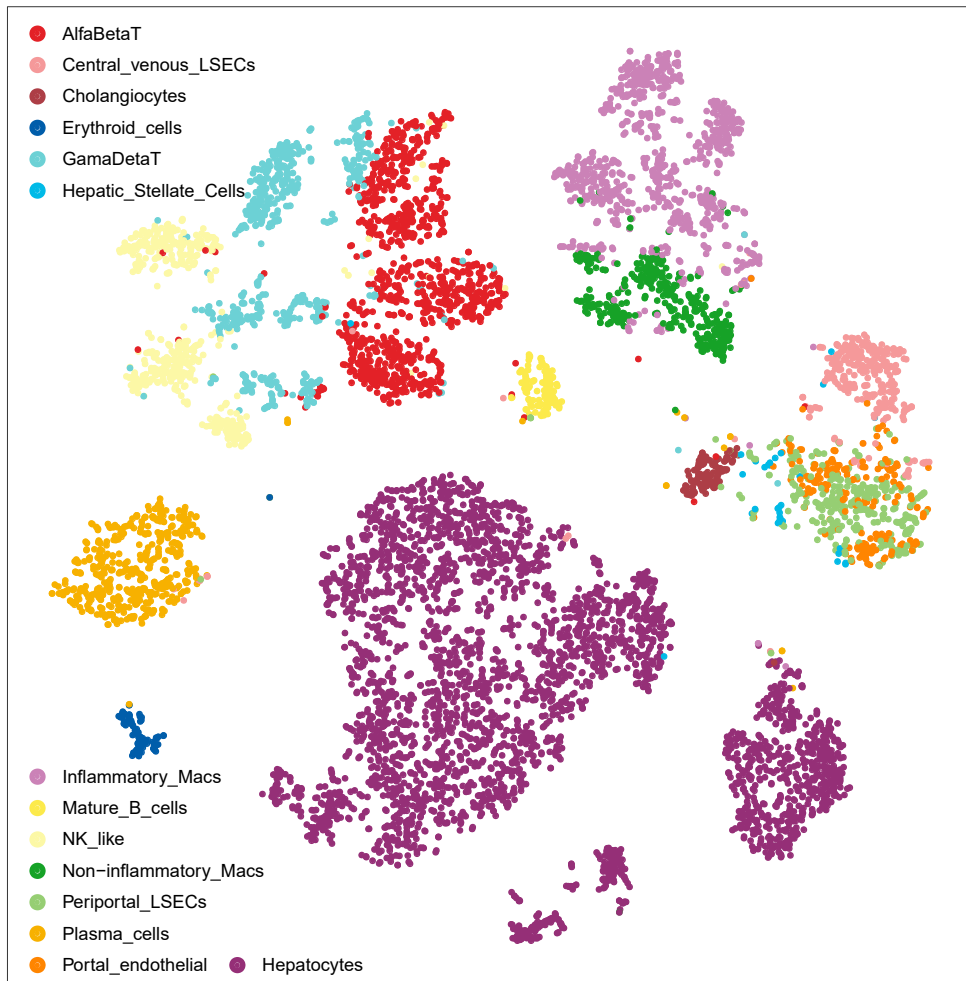

# Hepatocytes

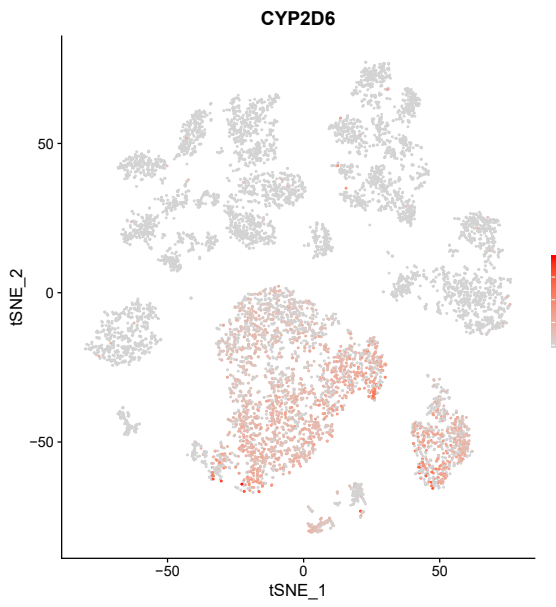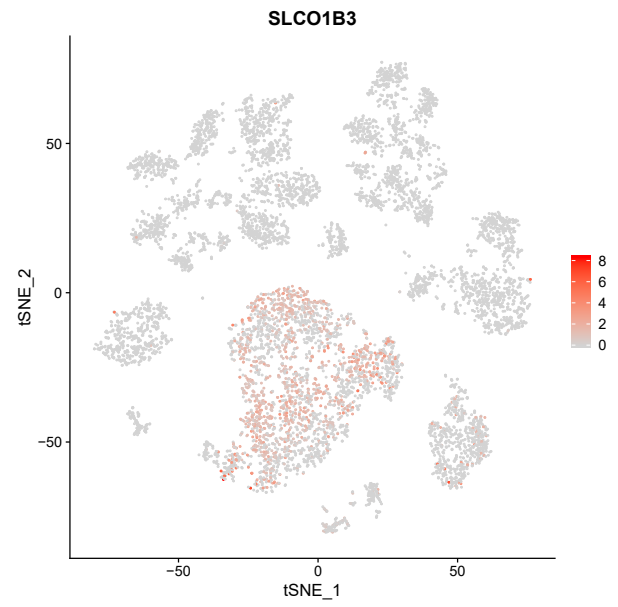

# Portal\_endothelial

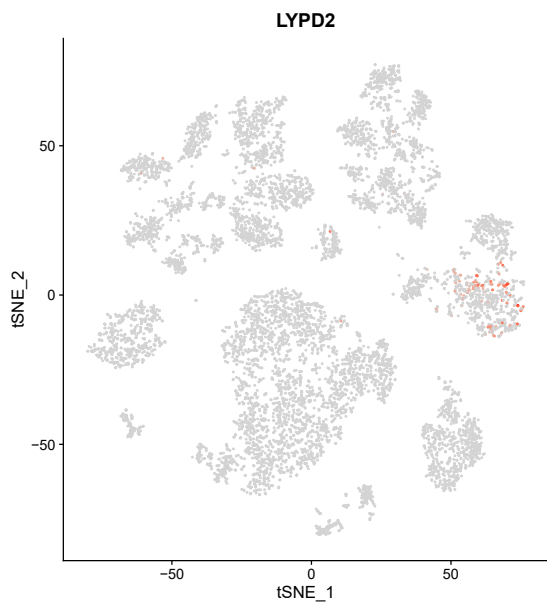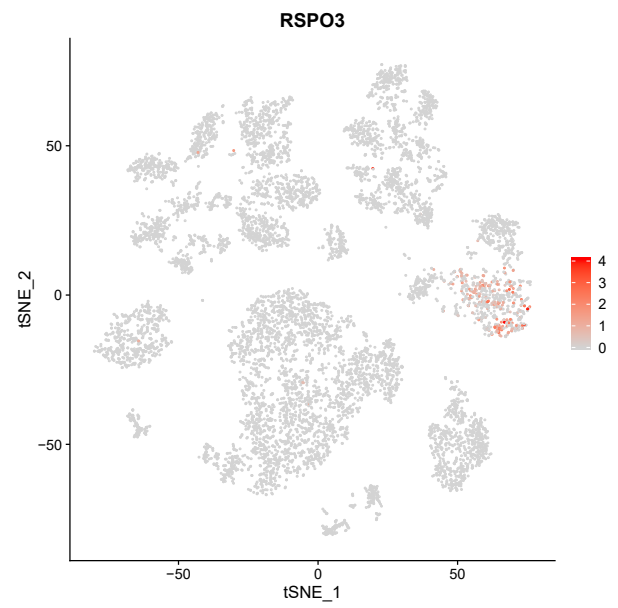

# AlfaBetaT

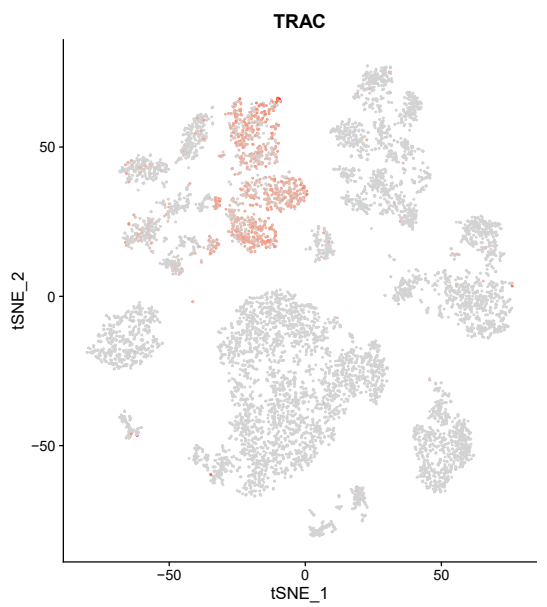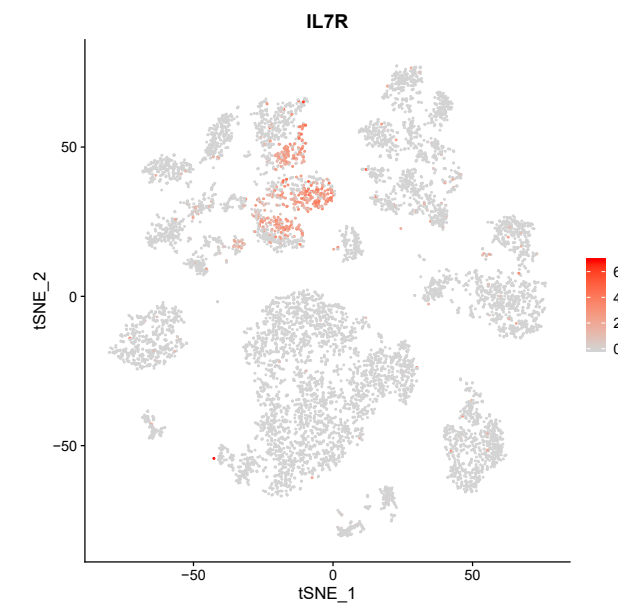

# NK\_like

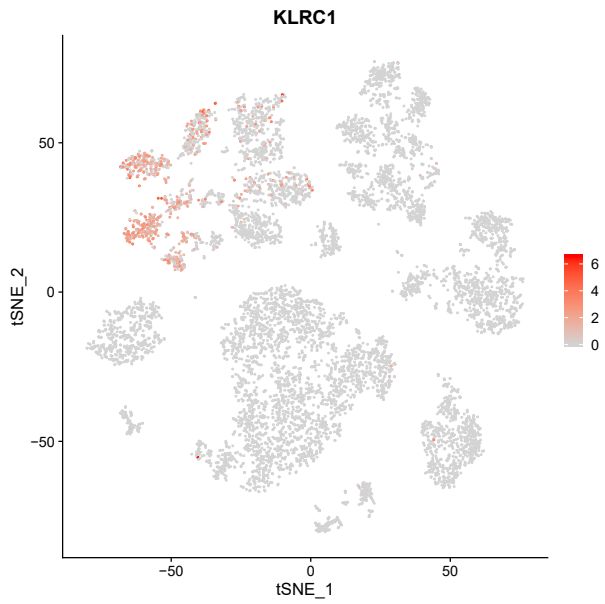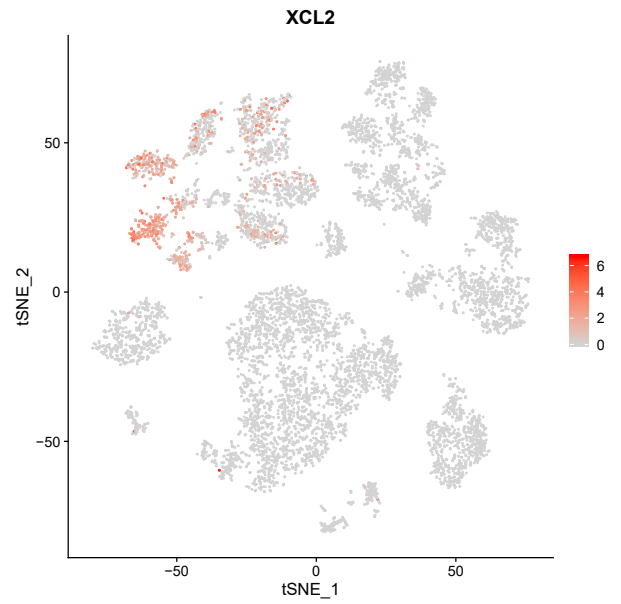

# GamaDetaT

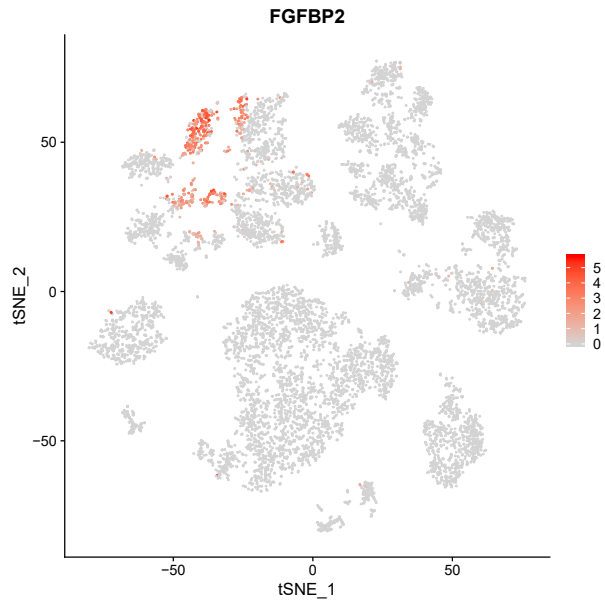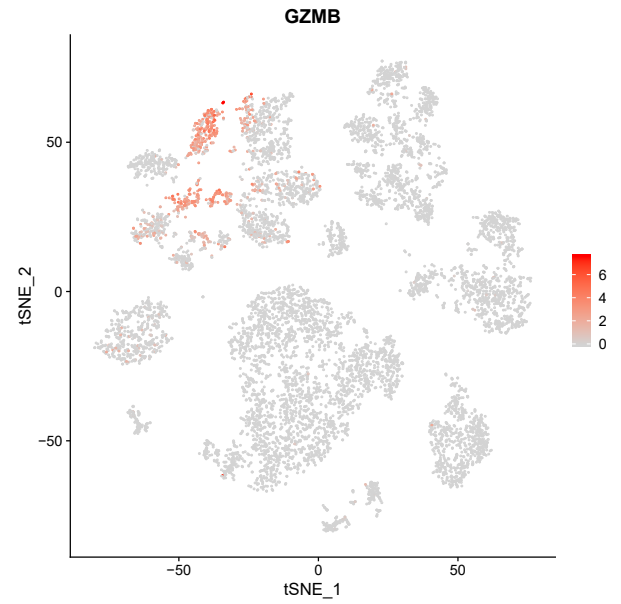

# Erythroid\_cells

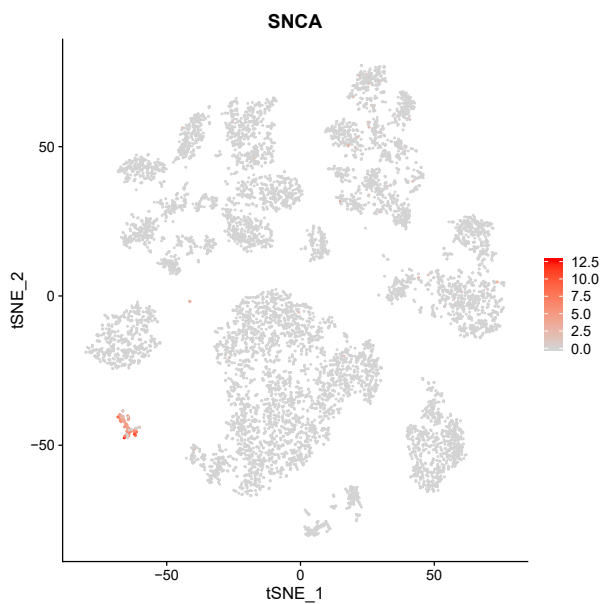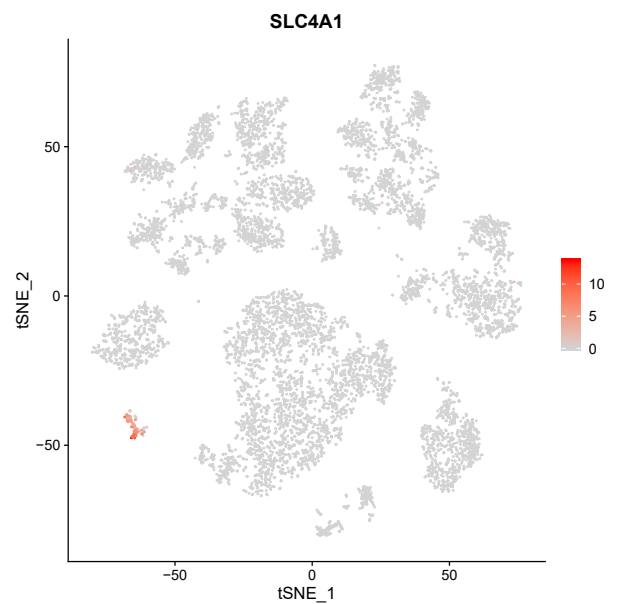

## Mature\_B\_cells

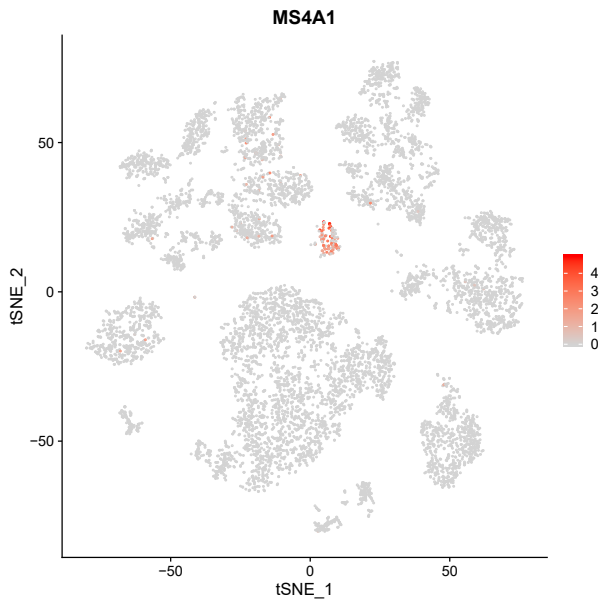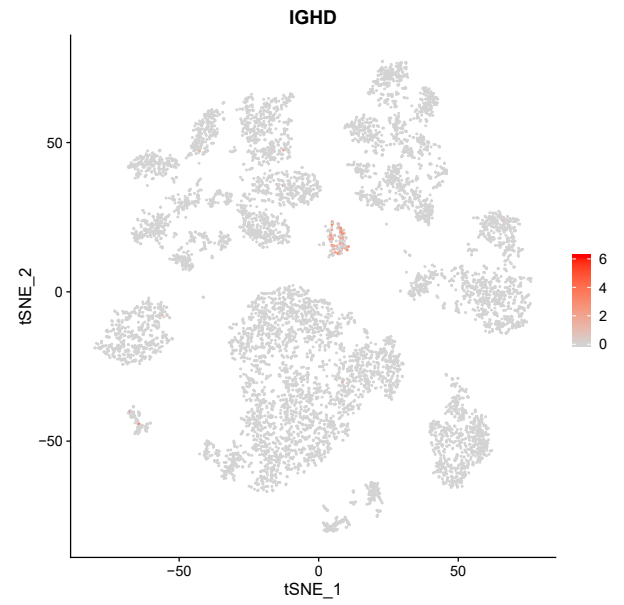

## Periportal\_LSECs

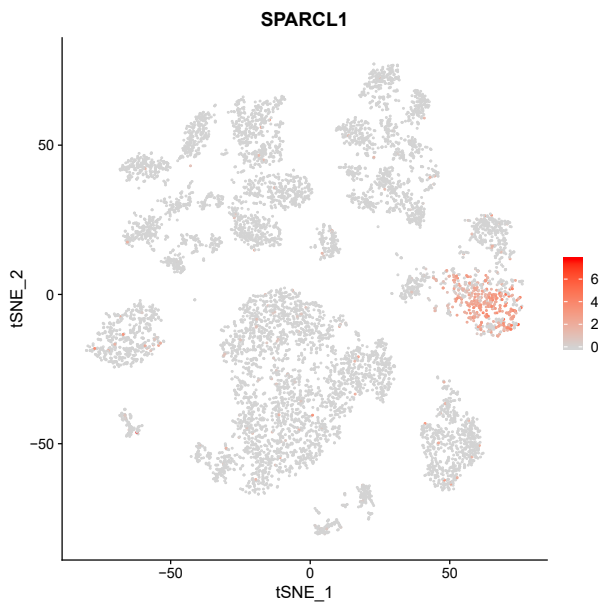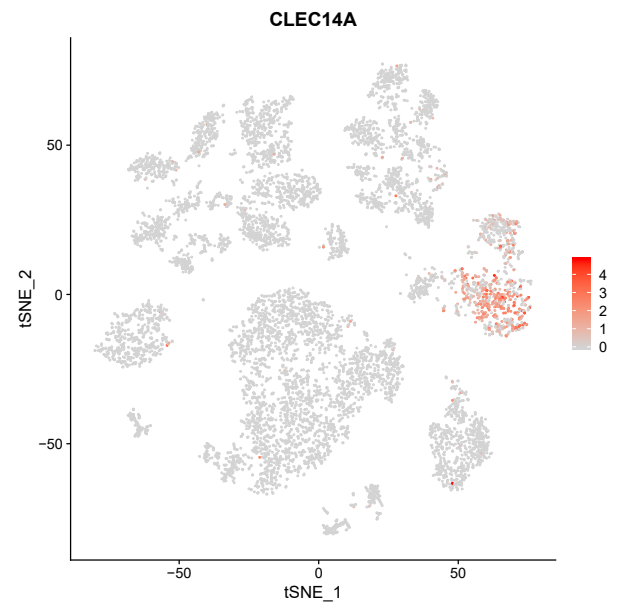

## Inflammatory\_Macs

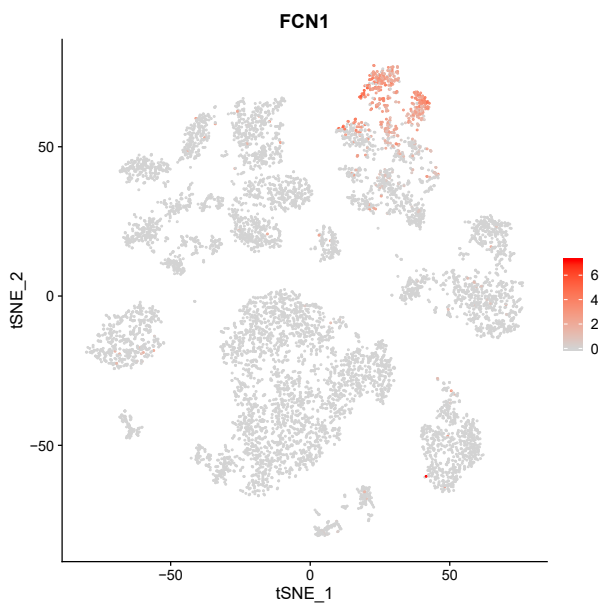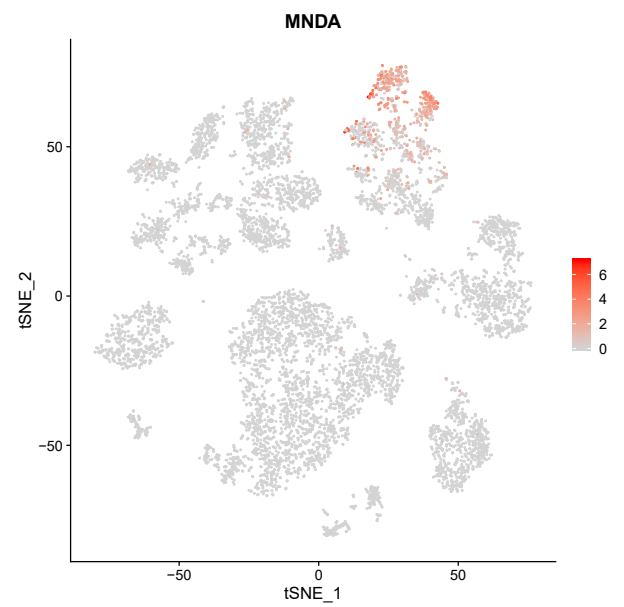

## Central\_venous\_LSECs

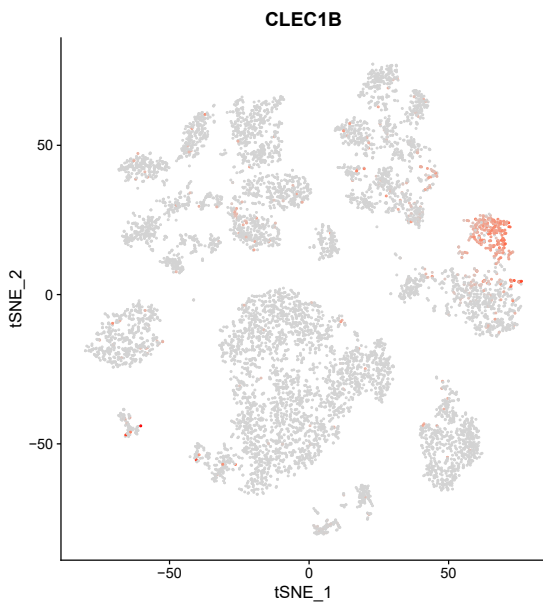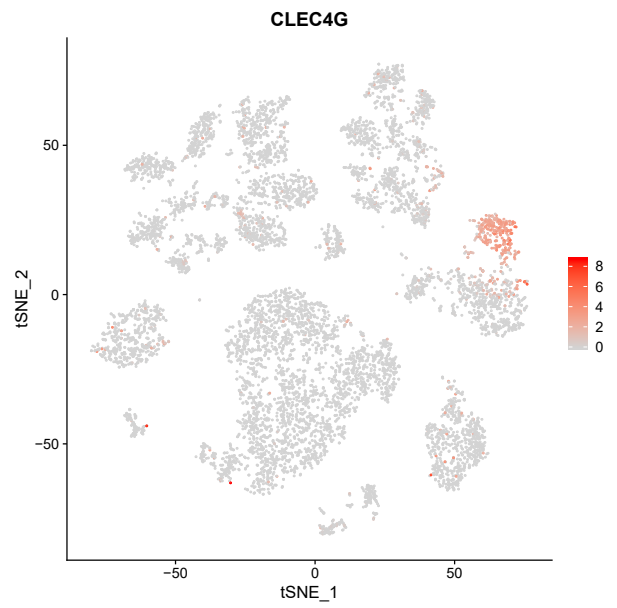

## Non-inflammatory\_Macs

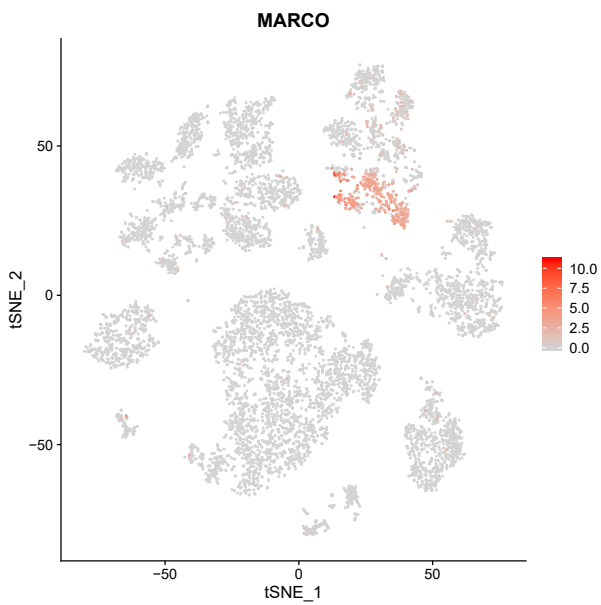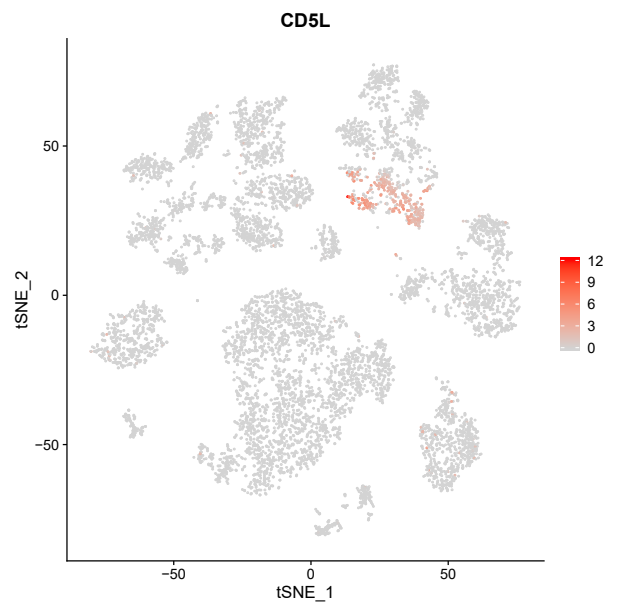

## Plasma\_cells

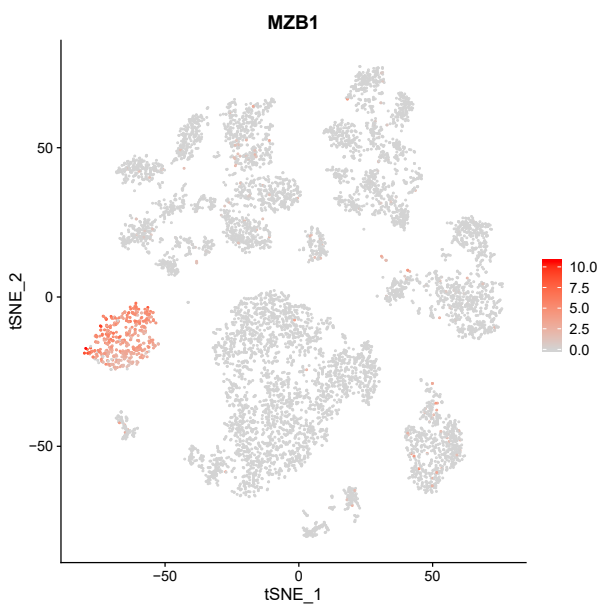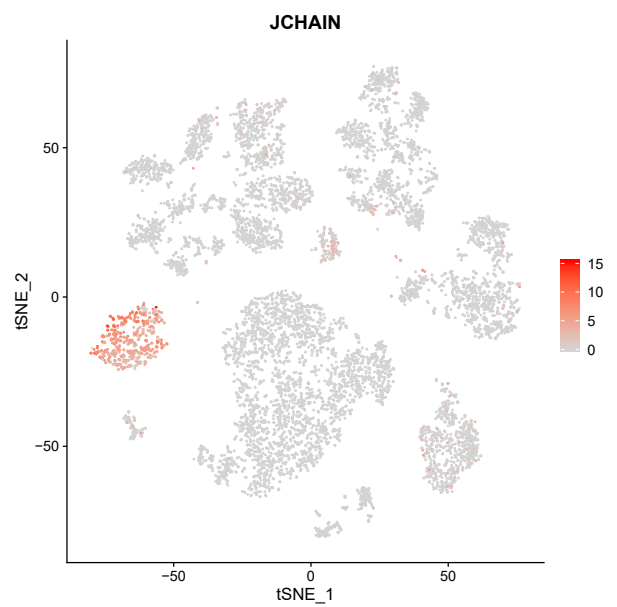

# Cholangiocytes

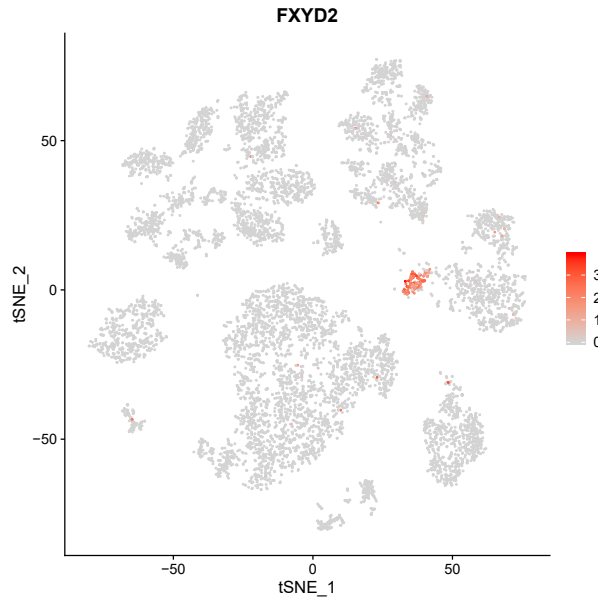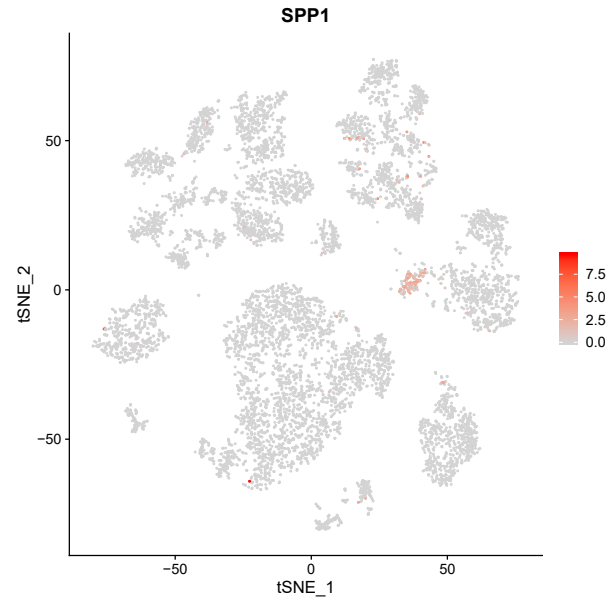

# Hepatic\_Stellate\_Cells

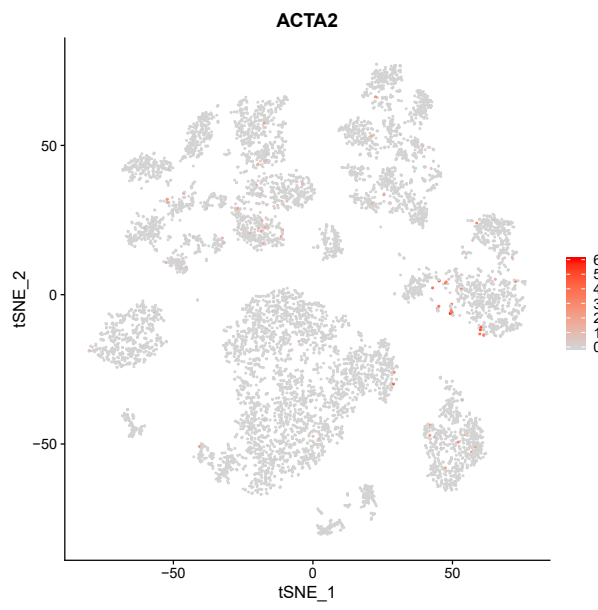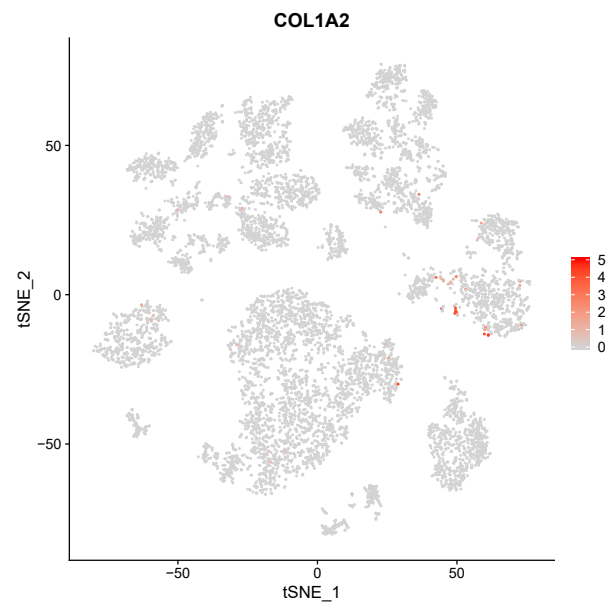

Supplement: 12864_2020_7223_MOESM10_ESM.pdf [file 12864_2020_7223_MOESM10_ESM.pdf]
