# Supplementary material for: gCAnno: a graph-based single cell type annotation method
Source: PubMed Central journal article supplement (PMC7686723; doi:10.1186/s12864-020-07223-4), 2020-11-23

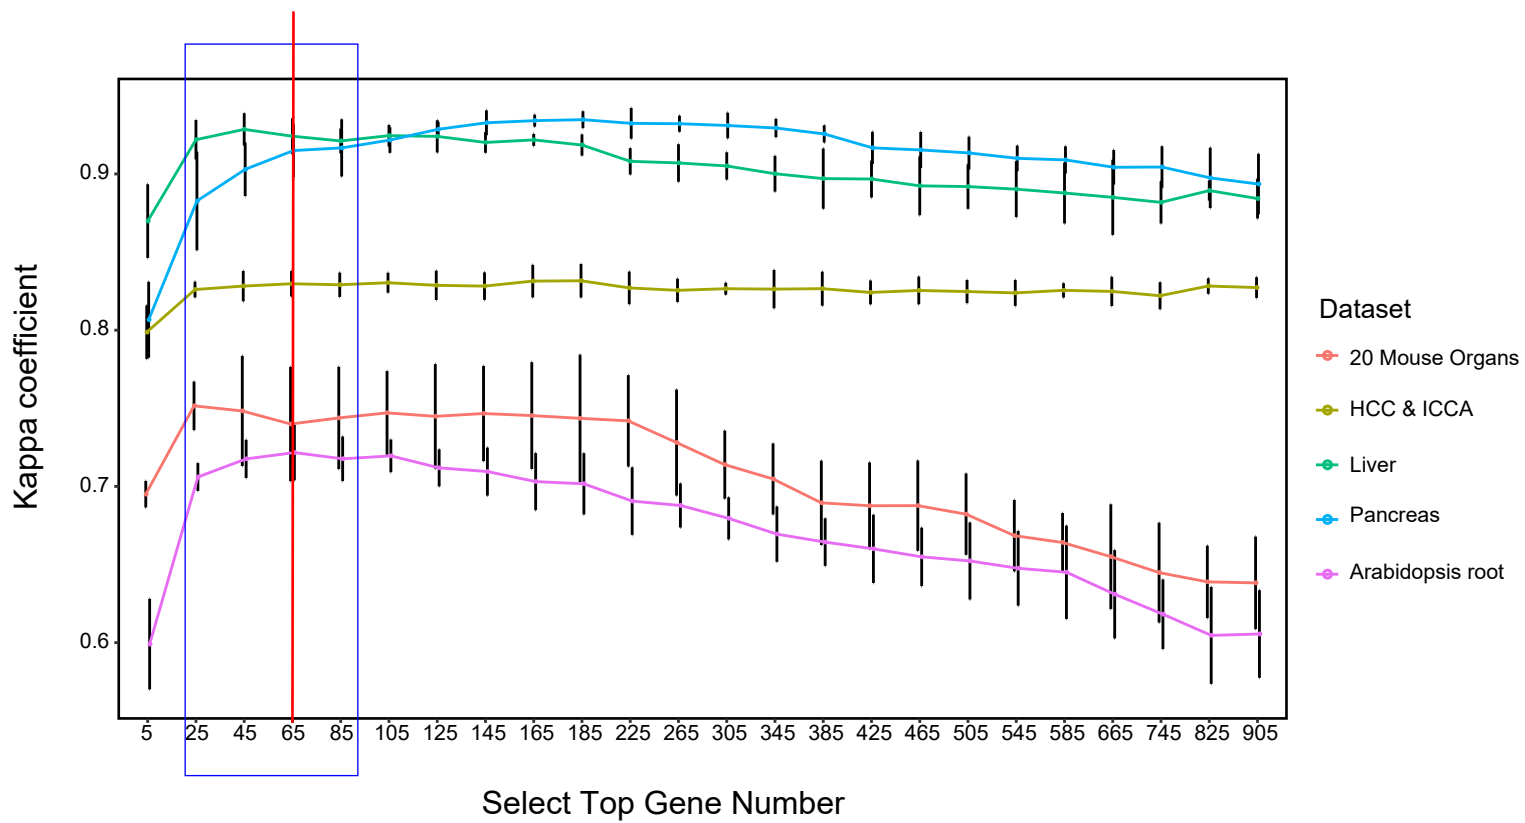

Supplement: 12864_2020_7223_MOESM1_ESM.pdf [file 12864_2020_7223_MOESM1_ESM.pdf]
