# Supplementary material for: gCAnno: a graph-based single cell type annotation method
Source: PubMed Central journal article supplement (PMC7686723; doi:10.1186/s12864-020-07223-4), 2020-11-23

**A****Liver**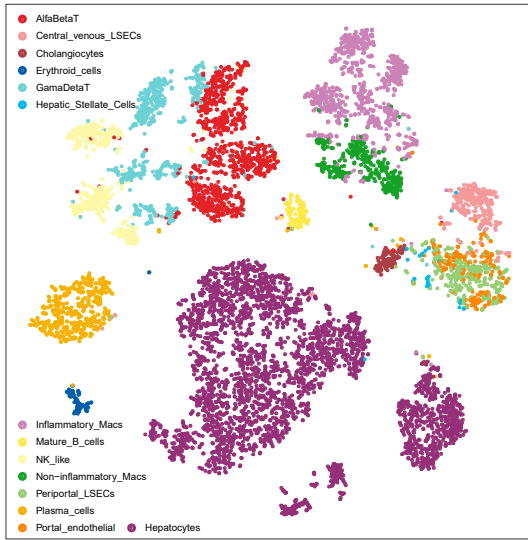**B****Pancreas**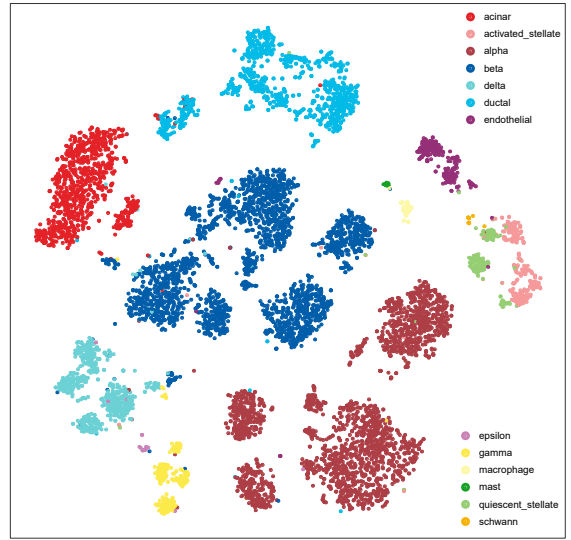**C****HCC & ICCA**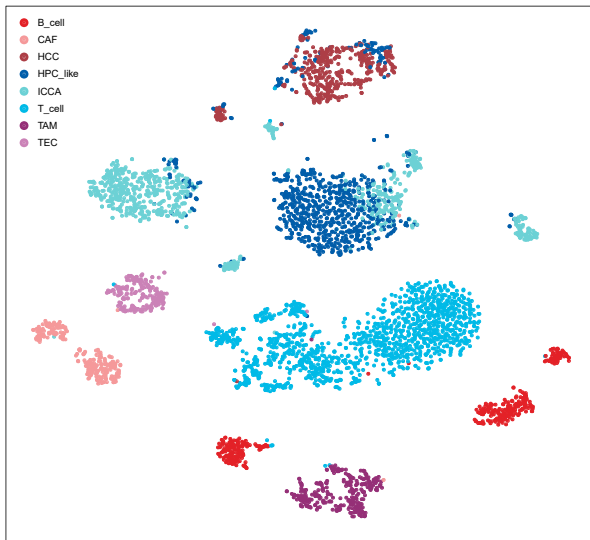**D****Arabidopsis thaliana root**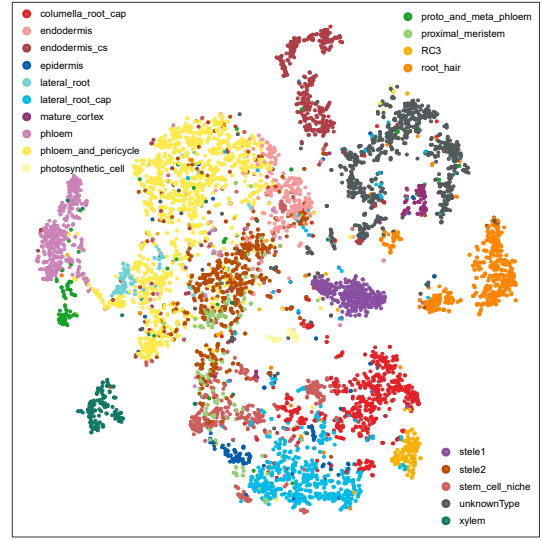

Supplement: 12864_2020_7223_MOESM3_ESM.pdf [file 12864_2020_7223_MOESM3_ESM.pdf]
