# Supplementary material for: gCAnno: a graph-based single cell type annotation method
Source: PubMed Central journal article supplement (PMC7686723; doi:10.1186/s12864-020-07223-4), 2020-11-23
Supplement: 12864_2020_7223_MOESM5_ESM.pdf [file 12864_2020_7223_MOESM5_ESM.pdf]

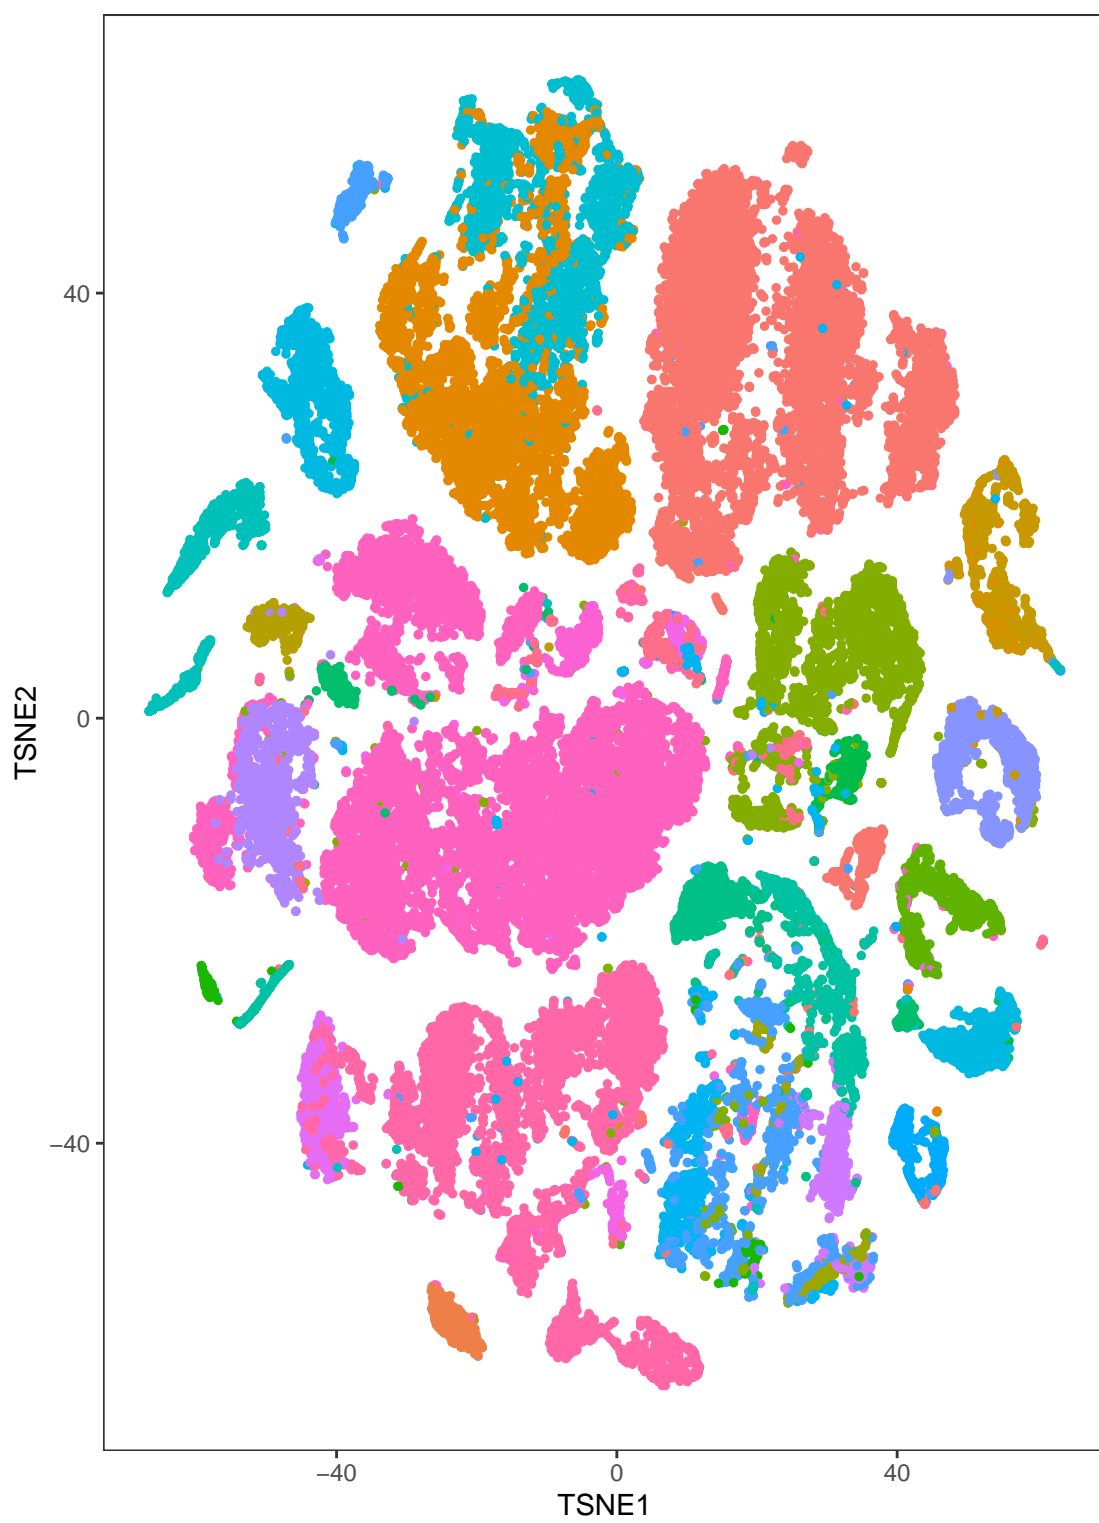

celltype

- B\_cell
- basal\_cell
- basal\_cell\_of\_epidermis
- basal\_cell\_of\_urothelium
- bladder\_cell
- chondroblast
- dendritic\_cell
- endothelial\_cell
- epithelial\_cell
- erythrocyte
- fenestrated\_cell
- fibroblast
- granulocyte
- hematopoietic\_stem\_cell
- hepatocyte
- keratinocyte
- kidney\_tubule\_cell
- leukocyte
- luminal\_cell\_of\_lactiferous\_duct
- macrophage
- mesenchymal\_cell
- mesenchymal\_stem\_cell
- monocyte
- natural\_killer\_cell
- neuroendocrine\_cell
- skeletal\_muscle\_satellite\_cell
- stromal\_cell
- T\_cell
- unknown
