# Supplementary material for: gCAnno: a graph-based single cell type annotation method
Source: PubMed Central journal article supplement (PMC7686723; doi:10.1186/s12864-020-07223-4), 2020-11-23

**a** HCC & ICCA reference dropout test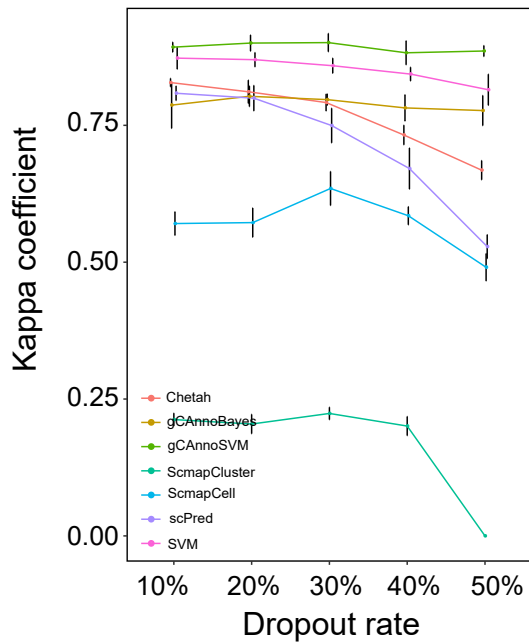**b** HCC & ICCA query dropout test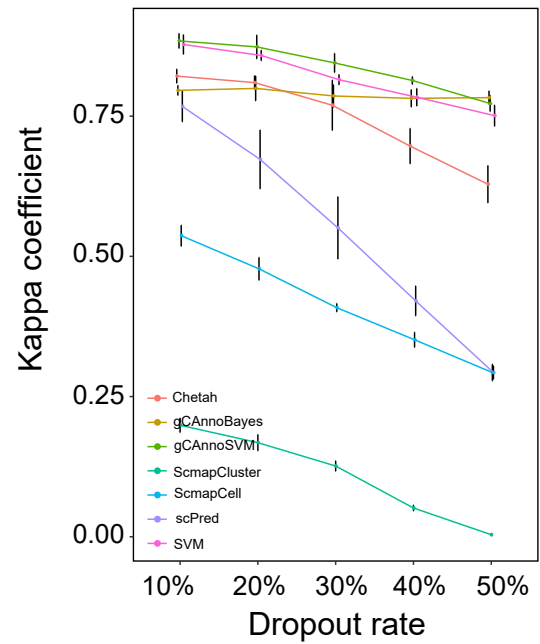**c** ATroot reference dropout test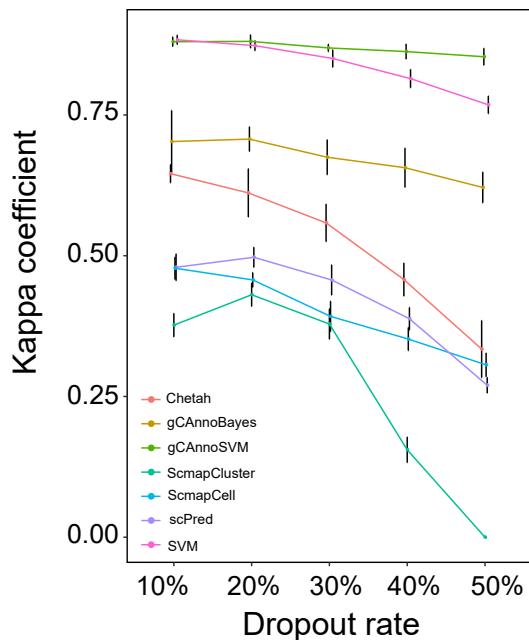**d** ATroot query dropout test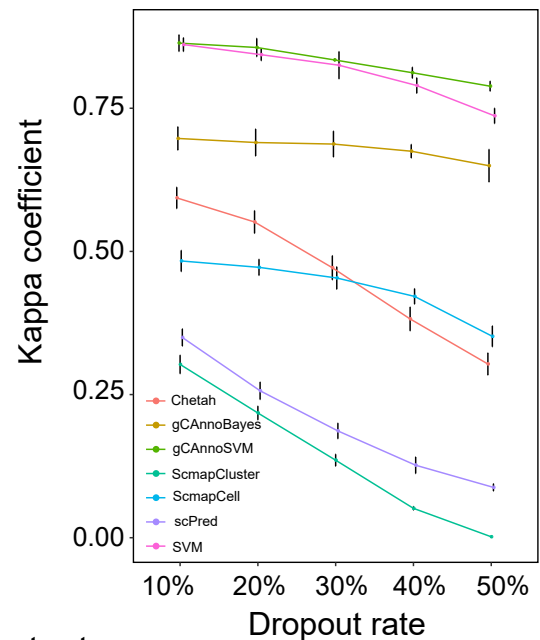**e** Imbalance test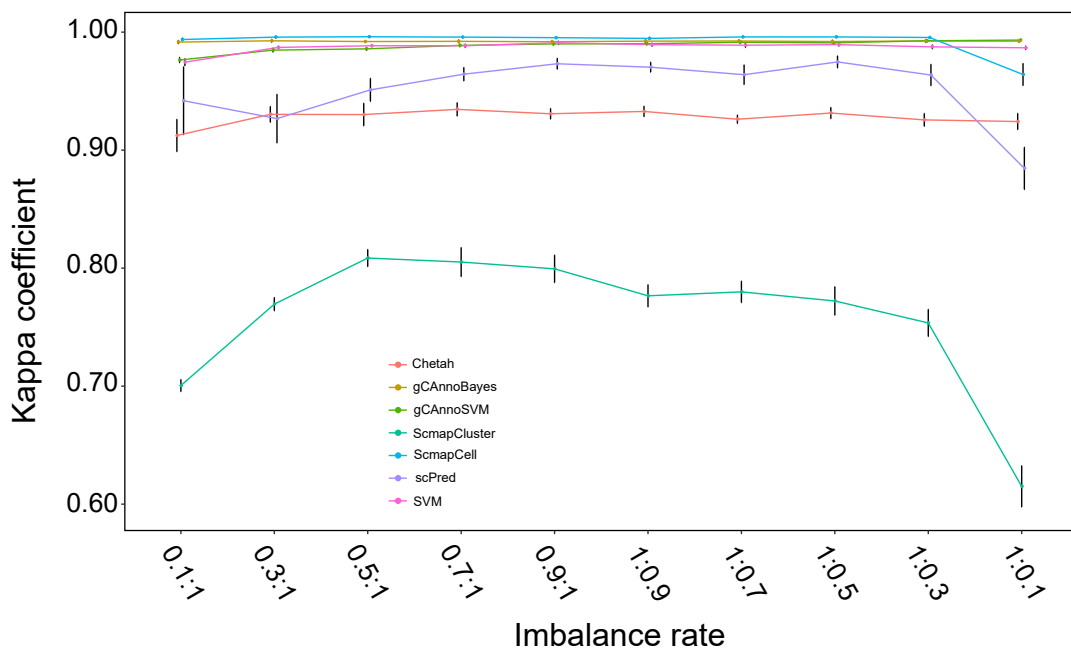

Supplement: 12864_2020_7223_MOESM15_ESM.pdf [file 12864_2020_7223_MOESM15_ESM.pdf]
