# Supplementary material for: gCAnno: a graph-based single cell type annotation method
Source: PubMed Central journal article supplement (PMC7686723; doi:10.1186/s12864-020-07223-4), 2020-11-23

$R = 0.94, p = 0.00043$

Building Model Time (min)

90  
60  
30

2500

5000

7500

10000

12500

The Number of Graph Node

9.53

18.39

14.87

10

20.48

26.38

77.19

105.62

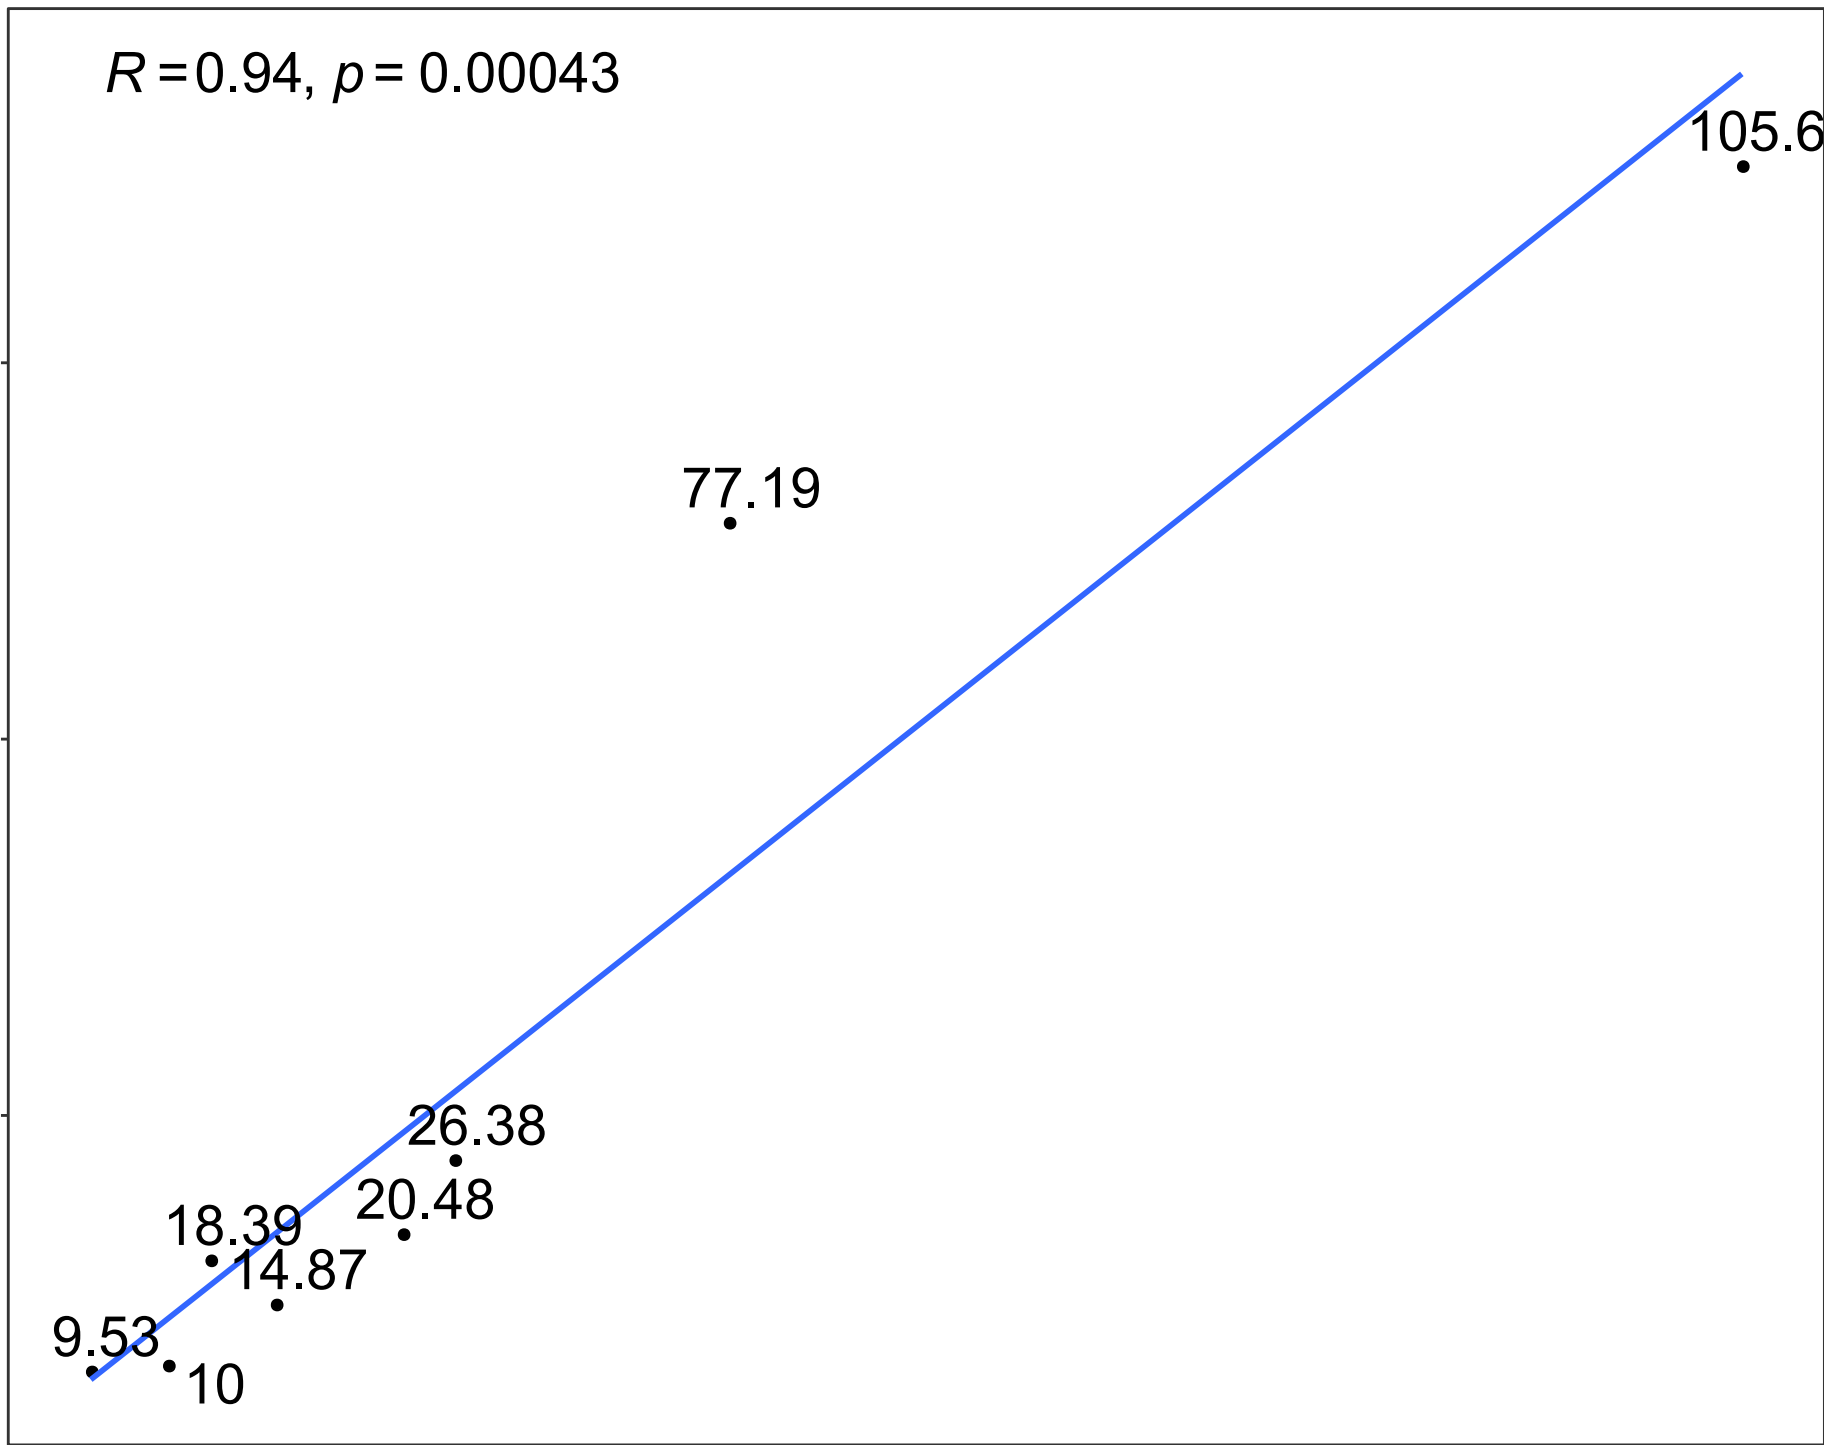

Supplement: 12864_2020_7223_MOESM21_ESM.pdf [file 12864_2020_7223_MOESM21_ESM.pdf]
