# Supplementary material for: gCAnno: a graph-based single cell type annotation method
Source: BMC Genomics. 2020 Nov 23;21:823. doi: 10.1186/s12864-020-07223-4 (PMC7686723; doi:10.1186/s12864-020-07223-4)
Supplement: Supplementary file 6 — Additional file 6: Table S2. The large dataset kappa coefficient result (Fig. 2e) and tSNE result. [file 12864_2020_7223_MOESM6_ESM.xlsx]

## Sheet: large dataset kappa
The result of adaptability for large dataset( 5-fold cross validation, using kappa coefficient)
tools	Kappa_coefficient
Chetah	0.795905
Scmap-Cluster	0.157357
Scmap-Cell	0.178325
scPred	0.634382
SVM	0.926103
gCAnno-Bayes	0.698827
gcAnno-SVM	0.935172
Chetah	0.802497
Scmap-Cluster	0.15823
Scmap-Cell	0.173009
scPred	0.638322
SVM	0.923596
gCAnno-Bayes	0.758552
gcAnno-SVM	0.9409
Chetah	0.807785
Scmap-Cluster	0.153935
Scmap-Cell	0.164023
scPred	0.630357
SVM	0.928546
gCAnno-Bayes	0.737176
gcAnno-SVM	0.93665
Chetah	0.810254
Scmap-Cluster	0.16245
Scmap-Cell	0.183599
scPred	0.632421
SVM	0.924468
gCAnno-Bayes	0.729133
gcAnno-SVM	0.939097
Chetah	0.782537
Scmap-Cluster	0.163469
Scmap-Cell	0.176741
scPred	0.622633
SVM	0.91882
gCAnno-Bayes	0.776052
gcAnno-SVM	0.932995

## Sheet: large dataset test result
Average kappa coefficient and standard deviation in Fig 2e
tools	meankappa	std
Chetah	0.8	0.0111
Scmap-Cluster	0.16	0.0039
Scmap-Cell	0.18	0.0073
scPred	0.63	0.0052
SVM	0.92	0.0036
gcAnno-Bayes	0.74	0.0294
gcAnno-SVM	0.94	0.0031

## Sheet: tSNE
tSNE result of large dataset
	TSNE1	TSNE2	cluster
cell_10X_P8_15_AAACCTGAGAGCCCAA	0.481983	-48.6709	neuroendocrine_cell
cell_10X_P8_15_AAACCTGAGCTAGTCT	-5.78926	-5.36924	stromal_cell
cell_10X_P8_15_AAACCTGAGGATGTAT	-14.7318	2.27608	neuroendocrine_cell
cell_10X_P8_15_AAACCTGAGGGATACC	12.7704	-38.1332	leukocyte
cell_10X_P8_15_AAACCTGAGTTTAGGA	-32.8636	-18.9017	stromal_cell
cell_10X_P8_15_AAACCTGCACCAACCG	-10.6905	-2.47381	stromal_cell
cell_10X_P8_15_AAACCTGCACGTCTCT	-9.59809	-8.5502	stromal_cell
cell_10X_P8_15_AAACCTGCAGGAACGT	22.6451	-4.5107	endothelial_cell
cell_10X_P8_15_AAACCTGGTAACGACG	-10.6679	-0.776066	stromal_cell
cell_10X_P8_15_AAACCTGGTCGCCATG	-6.83148	-8.18163	stromal_cell
cell_10X_P8_15_AAACCTGGTCGGCATC	-34.1963	-14.8213	stromal_cell
cell_10X_P8_15_AAACCTGGTGCGCTTG	10.7127	-43.9304	leukocyte
cell_10X_P8_15_AAACCTGTCAACACTG	-31.8892	-15.0861	stromal_cell
cell_10X_P8_15_AAACCTGTCACGATGT	-5.58078	-9.26862	stromal_cell
cell_10X_P8_15_AAACCTGTCATTGCGA	-1.95434	-0.214149	stromal_cell
cell_10X_P8_15_AAACCTGTCCTGCTTG	-0.483166	-47.9932	neuroendocrine_cell
cell_10X_P8_15_AAACGGGAGGTTACCT	42.7272	-15.4365	epithelial_cell
cell_10X_P8_15_AAACGGGAGTCGCCGT	3.11252	-8.59	stromal_cell
cell_10X_P8_15_AAACGGGCACGCTTTC	4.32543	-9.27376	stromal_cell
cell_10X_P8_15_AAACGGGCATCTCCCA	10.6004	-48.8685	leukocyte
cell_10X_P8_15_AAACGGGCATGCCTTC	-5.5638	-15.0393	stromal_cell
cell_10X_P8_15_AAACGGGCATGTCCTC	-30.6662	-8.14242	stromal_cell
cell_10X_P8_15_AAACGGGGTCCAACTA	-2.17607	-17.6558	stromal_cell
cell_10X_P8_15_AAACGGGGTCGCTTTC	47.244	-17.4297	epithelial_cell
cell_10X_P8_15_AAACGGGGTGCCTGTG	4.89102	-0.288309	stromal_cell
cell_10X_P8_15_AAACGGGTCAGCGACC	-32.0041	-20.9396	stromal_cell
cell_10X_P8_15_AAAGATGAGCTGAACG	-7.77451	-5.56939	stromal_cell
cell_10X_P8_15_AAAGATGAGTTATCGC	-32.8221	-10.1502	stromal_cell
cell_10X_P8_15_AAAGATGCACACCGCA	-1.45444	-16.1154	stromal_cell
cell_10X_P8_15_AAAGATGGTAGCGCTC	-35.4606	-7.14393	stromal_cell
cell_10X_P8_15_AAAGATGGTCATGCCG	-5.59408	-21.0957	stromal_cell
cell_10X_P8_15_AAAGATGGTCTGGTCG	4.23643	-1.24053	stromal_cell
cell_10X_P8_15_AAAGATGTCCCATTAT	-23.4267	-19.1719	stromal_cell
cell_10X_P8_15_AAAGATGTCCCGACTT	-4.84574	-13.2718	stromal_cell
cell_10X_P8_15_AAAGATGTCGGTCCGA	-27.0801	-19.3551	stromal_cell
cell_10X_P8_15_AAAGCAAAGACCTTTG	1.02277	-5.8938	stromal_cell
cell_10X_P8_15_AAAGCAACACGAAATA	-1.78892	-7.37734	stromal_cell
cell_10X_P8_15_AAAGCAACATGCCTAA	-33.4341	-4.38451	stromal_cell
cell_10X_P8_15_AAAGCAACATGGATGG	-28.5369	-13.4422	stromal_cell
cell_10X_P8_15_AAAGCAAGTTCCACTC	-11.142	-18.5539	stromal_cell
cell_10X_P8_15_AAAGCAATCCACGTTC	-28.6786	-7.91584	stromal_cell
cell_10X_P8_15_AAAGTAGAGACTAAGT	6.14564	0.231744	stromal_cell
cell_10X_P8_15_AAAGTAGAGGACAGCT	1.30781	-11.4541	stromal_cell
cell_10X_P8_15_AAAGTAGAGGCCCTTG	-6.59748	-16.8625	stromal_cell
cell_10X_P8_15_AAAGTAGAGTCCGGTC	-38.6705	-13.5815	stromal_cell
cell_10X_P8_15_AAAGTAGCAAACGCGA	-13.003	-17.6539	stromal_cell
cell_10X_P8_15_AAAGTAGGTAGCGATG	11.2667	-3.15275	stromal_cell
cell_10X_P8_15_AAAGTAGGTGCGGTAA	-35.0058	-10.1316	stromal_cell
cell_10X_P8_15_AAAGTAGGTGTAACGG	8.19303	-7.02442	stromal_cell
cell_10X_P8_15_AAAGTAGGTTAGTGGG	-15.655	-5.30839	stromal_cell
cell_10X_P8_15_AAAGTAGTCACAACGT	21.6902	4.91193	endothelial_cell
cell_10X_P8_15_AAAGTAGTCAGGCGAA	6.75809	-5.77347	stromal_cell
cell_10X_P8_15_AAAGTAGTCATCGATG	-14.0976	-2.45766	stromal_cell
cell_10X_P8_15_AAAGTAGTCATGGTCA	-4.53332	-9.30524	stromal_cell
cell_10X_P8_15_AAAGTAGTCGGCGGTT	-3.38077	-1.55392	stromal_cell
cell_10X_P8_15_AAATGCCAGGACACCA	6.99685	-49.7695	leukocyte
cell_10X_P8_15_AAATGCCAGGTGATTA	-6.7884	-21.0636	stromal_cell
cell_10X_P8_15_AAATGCCCAAGGGTCA	-29.1905	-9.97591	stromal_cell
cell_10X_P8_15_AAATGCCCAATGAAAC	5.0258	-6.37427	stromal_cell
cell_10X_P8_15_AAATGCCCAGCCTATA	-12.2415	-12.5687	stromal_cell
cell_10X_P8_15_AAATGCCCATCCGCGA	11.9789	-47.1562	leukocyte
cell_10X_P8_15_AAATGCCGTCTTTCAT	9.17583	-0.290771	stromal_cell
cell_10X_P8_15_AAATGCCGTGACTACT	-4.82554	-7.64295	stromal_cell
cell_10X_P8_15_AAATGCCTCCGAATGT	-21.122	-18.0051	stromal_cell
cell_10X_P8_15_AACACGTAGCGCCTTG	12.4878	-38.5023	leukocyte
cell_10X_P8_15_AACACGTAGGATCGCA	0.333869	-1.60059	stromal_cell
cell_10X_P8_15_AACACGTAGGATTCGG	-29.4361	-6.87509	stromal_cell
cell_10X_P8_15_AACACGTAGGTAGCTG	11.02	-36.6889	leukocyte
cell_10X_P8_15_AACACGTGTCGAATCT	-5.96072	-23.2103	stromal_cell
cell_10X_P8_15_AACACGTTCATCACCC	-18.7456	-4.51355	stromal_cell
cell_10X_P8_15_AACACGTTCGTTGACA	-6.09313	-1.93769	stromal_cell
cell_10X_P8_15_AACCATGAGAGACTTA	4.80189	-4.18946	stromal_cell
cell_10X_P8_15_AACCATGAGAGCCCAA	-34.426	-15.254	stromal_cell
cell_10X_P8_15_AACCATGAGCTCCTTC	-34.1981	-14.6886	stromal_cell
cell_10X_P8_15_AACCATGAGGCTCTTA	13.3768	-49.6416	leukocyte
cell_10X_P8_15_AACCATGGTCACCTAA	2.21693	-15.9522	stromal_cell
cell_10X_P8_15_AACCATGGTCTCAACA	15.6352	-48.9098	leukocyte
cell_10X_P8_15_AACCATGGTCTTGTCC	5.51367	1.40137	stromal_cell
cell_10X_P8_15_AACCATGGTTCCTCCA	1.98663	-6.85346	stromal_cell
cell_10X_P8_15_AACCATGTCAACGAAA	5.92927	-2.73414	stromal_cell
cell_10X_P8_15_AACCATGTCGCCCTTA	-18.7519	-9.69895	stromal_cell
cell_10X_P8_15_AACCGCGGTTATTCTC	-1.86008	-1.13166	stromal_cell
cell_10X_P8_15_AACCGCGTCAAACCAC	7.39639	-5.34209	stromal_cell
cell_10X_P8_15_AACCGCGTCAATAAGG	8.88898	8.57293	neuroendocrine_cell
cell_10X_P8_15_AACCGCGTCACATAGC	-21.2956	-21.4049	stromal_cell
cell_10X_P8_15_AACGTTGAGACTAAGT	-0.986399	-1.68279	stromal_cell
cell_10X_P8_15_AACGTTGAGCACAGGT	4.62289	-6.40344	stromal_cell
cell_10X_P8_15_AACGTTGAGGTGGGTT	5.47904	-10.2439	stromal_cell
cell_10X_P8_15_AACGTTGCAACACGCC	-33.6895	-12.5379	stromal_cell
cell_10X_P8_15_AACGTTGCACAAGCCC	-12.1991	-10.6287	stromal_cell
cell_10X_P8_15_AACGTTGCACCGATAT	1.89221	-4.8491	stromal_cell
cell_10X_P8_15_AACGTTGCACGTGAGA	-11.9554	-18.3606	stromal_cell
cell_10X_P8_15_AACGTTGGTCAGTGGA	-5.40345	-12.7034	stromal_cell
cell_10X_P8_15_AACGTTGGTGCCTGGT	-30.1252	-7.76311	stromal_cell
cell_10X_P8_15_AACGTTGGTTAAAGAC	20.7703	1.60707	endothelial_cell
cell_10X_P8_15_AACGTTGTCAACCAAC	0.602385	-7.7756	stromal_cell
cell_10X_P8_15_AACGTTGTCAGGTTCA	-7.02213	-13.7073	stromal_cell
cell_10X_P8_15_AACGTTGTCCGTCAAA	2.47199	-8.29323	stromal_cell
cell_10X_P8_15_AACGTTGTCCTTTCGG	10.7233	-44.0089	leukocyte
cell_10X_P8_15_AACGTTGTCGATCCCT	-28.4007	-11.9145	stromal_cell
cell_10X_P8_15_AACGTTGTCTGGTATG	-34.0981	-7.05152	stromal_cell
cell_10X_P8_15_AACTCAGAGGCAGTCA	-32.8554	-2.42345	stromal_cell
cell_10X_P8_15_AACTCAGAGTCAAGGC	-23.8468	-11.3884	stromal_cell
cell_10X_P8_15_AACTCAGAGTGCTGCC	-1.75577	-0.728708	stromal_cell
cell_10X_P8_15_AACTCAGCACACGCTG	-6.87566	-17.3026	stromal_cell
cell_10X_P8_15_AACTCAGCACACTGCG	9.44464	-2.58009	stromal_cell
cell_10X_P8_15_AACTCAGCAGACGTAG	-0.363315	-5.88257	stromal_cell
cell_10X_P8_15_AACTCAGCAGTCGATT	-7.95677	-21.7826	stromal_cell
cell_10X_P8_15_AACTCAGCATCATCCC	-5.41008	-10.0207	stromal_cell
cell_10X_P8_15_AACTCAGGTCTCACCT	-34.5727	-11.5219	stromal_cell
cell_10X_P8_15_AACTCAGTCGCAGGCT	-13.8922	-13.9279	stromal_cell
cell_10X_P8_15_AACTCCCAGGCCATAG	-11.4362	-18.907	stromal_cell
cell_10X_P8_15_AACTCCCAGGTGCACA	-27.6135	-17.2415	stromal_cell
cell_10X_P8_15_AACTCCCCACGGTAAG	1.52799	-11.3158	stromal_cell
cell_10X_P8_15_AACTCCCCAGGGTACA	47.0103	-15.2486	epithelial_cell
cell_10X_P8_15_AACTCCCCAGTGGAGT	-4.10094	-16.784	stromal_cell
cell_10X_P8_15_AACTCCCCATAACCTG	49.7958	-18.8603	epithelial_cell
cell_10X_P8_15_AACTCCCGTAGTAGTA	-30.9012	-17.5148	stromal_cell
cell_10X_P8_15_AACTCCCGTCTAAACC	21.1083	-1.59723	endothelial_cell
cell_10X_P8_15_AACTCCCTCGTACCGG	-34.8004	-16.8077	stromal_cell
cell_10X_P8_15_AACTCTTAGCAGCGTA	-18.0753	-19.7844	stromal_cell
cell_10X_P8_15_AACTCTTAGTGGTAGC	12.6349	-38.2249	leukocyte
cell_10X_P8_15_AACTCTTCAGACGCTC	-34.4596	-6.70021	stromal_cell
cell_10X_P8_15_AACTCTTCAGGATTGG	8.28974	-4.82128	stromal_cell
cell_10X_P8_15_AACTCTTCAGGTTTCA	0.203875	-16.8557	stromal_cell
cell_10X_P8_15_AACTCTTGTCACCCAG	-16.8873	-19.4059	stromal_cell
cell_10X_P8_15_AACTCTTTCGTTACGA	-31.5522	-7.03191	stromal_cell
cell_10X_P8_15_AACTCTTTCTGATTCT	-0.540037	-48.2609	neuroendocrine_cell
cell_10X_P8_15_AACTGGTAGTGTACCT	-10.4916	-20.0011	stromal_cell
cell_10X_P8_15_AACTGGTCACATTAGC	-1.14774	-12.4094	stromal_cell
cell_10X_P8_15_AACTGGTCACCTATCC	-4.8438	-5.84624	stromal_cell
cell_10X_P8_15_AACTGGTCACGAAATA	-11.4939	-5.87305	stromal_cell
cell_10X_P8_15_AACTGGTCATCAGTCA	-35.8598	-7.62258	stromal_cell
cell_10X_P8_15_AACTGGTCATCCCATC	0.0721774	-5.78188	stromal_cell
cell_10X_P8_15_AACTGGTGTGAAAGAG	2.57763	-2.07238	stromal_cell
cell_10X_P8_15_AACTGGTGTTATCACG	-5.51452	-13.4114	stromal_cell
cell_10X_P8_15_AACTGGTTCAGGTAAA	-4.59556	-11.8171	stromal_cell
cell_10X_P8_15_AACTTTCCAATCTACG	-33.3711	-4.39143	stromal_cell
cell_10X_P8_15_AACTTTCCAGTAAGAT	19.0847	-44.7746	leukocyte
cell_10X_P8_15_AACTTTCCAGTAAGCG	23.9225	9.54159	endothelial_cell
cell_10X_P8_15_AACTTTCGTCTGGTCG	-32.3316	-11.6033	stromal_cell
cell_10X_P8_15_AACTTTCGTGTCTGAT	-20.123	-5.48087	stromal_cell
cell_10X_P8_15_AACTTTCGTTAAGTAG	10.6423	-1.28893	stromal_cell
cell_10X_P8_15_AACTTTCGTTGATTCG	6.19843	-7.43343	stromal_cell
cell_10X_P8_15_AACTTTCTCAGTTAGC	49.7755	-18.8251	epithelial_cell
cell_10X_P8_15_AACTTTCTCGCTTGTC	5.26469	1.08585	stromal_cell
cell_10X_P8_15_AAGACCTAGCGTAATA	-10.4525	-0.00435672	stromal_cell
cell_10X_P8_15_AAGACCTAGTACACCT	-22.7428	-17.6026	stromal_cell
cell_10X_P8_15_AAGACCTAGTACTTGC	21.7222	3.74402	endothelial_cell
cell_10X_P8_15_AAGACCTAGTGTTTGC	3.25329	-11.017	stromal_cell
cell_10X_P8_15_AAGACCTAGTTTAGGA	-18.0586	-10.0971	stromal_cell
cell_10X_P8_15_AAGACCTGTACGACCC	5.07172	-2.18488	stromal_cell
cell_10X_P8_15_AAGACCTGTCTCTTAT	-15.1642	-5.52836	stromal_cell
cell_10X_P8_15_AAGACCTTCAGTTGAC	-41.2371	-14.1135	stromal_cell
cell_10X_P8_15_AAGACCTTCGTGGACC	1.38274	-2.16496	stromal_cell
cell_10X_P8_15_AAGCCGCCAAAGAATC	-31.8195	-21.8194	stromal_cell
cell_10X_P8_15_AAGCCGCCACAACGCC	4.33822	2.10588	stromal_cell
cell_10X_P8_15_AAGCCGCGTGCACTTA	-30.292	-11.2632	stromal_cell
cell_10X_P8_15_AAGCCGCGTTGTCGCG	-32.1246	-22.0781	stromal_cell
cell_10X_P8_15_AAGCCGCTCCGTAGGC	3.70838	-4.01219	stromal_cell
cell_10X_P8_15_AAGCCGCTCCTTTCGG	50.192	-19.5746	epithelial_cell
cell_10X_P8_15_AAGCCGCTCGTACGGC	-38.8775	-13.3878	stromal_cell
cell_10X_P8_15_AAGCCGCTCTATGTGG	-5.72951	-5.54364	stromal_cell
cell_10X_P8_15_AAGGAGCCAACTGCGC	-8.99383	-4.74303	stromal_cell
cell_10X_P8_15_AAGGAGCCACCGCTAG	-2.30858	-17.4209	stromal_cell
cell_10X_P8_15_AAGGAGCCATGTAAGA	-34.1925	-10.7895	stromal_cell
cell_10X_P8_15_AAGGAGCGTCAACTGT	2.39259	-14.9489	stromal_cell
cell_10X_P8_15_AAGGAGCGTGCCTTGG	-13.5922	-9.56588	stromal_cell
cell_10X_P8_15_AAGGAGCGTTCGGCAC	-0.799224	0.148925	stromal_cell
cell_10X_P8_15_AAGGAGCTCAATAAGG	9.99698	-37.3	leukocyte
cell_10X_P8_15_AAGGAGCTCAGCTCGG	-13.0805	-13.9472	stromal_cell
cell_10X_P8_15_AAGGCAGAGCACACAG	-20.9099	-20.9277	stromal_cell
cell_10X_P8_15_AAGGCAGCATGAAGTA	1.72138	-14.4182	stromal_cell
cell_10X_P8_15_AAGGCAGCATGCCCGA	5.75885	-10.6161	stromal_cell
cell_10X_P8_15_AAGGCAGGTATTCGTG	-9.20781	-18.4415	stromal_cell
cell_10X_P8_15_AAGGCAGGTCCGAAGA	-11.4292	-7.78047	stromal_cell
cell_10X_P8_15_AAGGCAGGTGAAAGAG	-2.0836	-6.3544	stromal_cell
cell_10X_P8_15_AAGGCAGTCCGAAGAG	9.88578	-0.190435	stromal_cell
cell_10X_P8_15_AAGGCAGTCCTAGTGA	-36.4278	-19.0293	stromal_cell
cell_10X_P8_15_AAGGTTCAGAAGGTGA	-4.64644	-1.95185	stromal_cell
cell_10X_P8_15_AAGGTTCAGCTGGAAC	-37.9616	-17.3065	stromal_cell
cell_10X_P8_15_AAGGTTCAGTCAATAG	-0.557224	-47.8533	neuroendocrine_cell
cell_10X_P8_15_AAGGTTCCACGAGGTA	-9.4284	-3.72964	stromal_cell
cell_10X_P8_15_AAGGTTCTCAGAAATG	-33.6974	-4.51266	stromal_cell
cell_10X_P8_15_AAGTCTGAGCAGATCG	50.2551	-19.4075	epithelial_cell
cell_10X_P8_15_AAGTCTGAGCTAACAA	-35.3268	-10.0457	stromal_cell
cell_10X_P8_15_AAGTCTGAGCTACCGC	5.2631	-11.3084	stromal_cell
cell_10X_P8_15_AAGTCTGCATTGTGCA	4.30947	-7.20492	stromal_cell
cell_10X_P8_15_AAGTCTGGTCATGCCG	23.3712	7.57762	endothelial_cell
cell_10X_P8_15_AAGTCTGGTGCGCTTG	-3.6002	1.37336	stromal_cell
cell_10X_P8_15_AAGTCTGGTGTAACGG	-37.2916	-12.7884	stromal_cell
cell_10X_P8_15_AAGTCTGTCTGGCGAC	-14.2583	2.34816	neuroendocrine_cell
cell_10X_P8_15_AAGTCTGTCTTGAGAC	-30.0025	-4.32699	stromal_cell
cell_10X_P8_15_AATCCAGAGGAGTTGC	-0.497448	-45.2305	neuroendocrine_cell
cell_10X_P8_15_AATCCAGAGGGATCTG	-9.11271	-6.45596	stromal_cell
cell_10X_P8_15_AATCCAGCACAGGCCT	11.3192	-0.991437	stromal_cell
cell_10X_P8_15_AATCCAGCATACGCTA	-31.5679	-12.459	stromal_cell
cell_10X_P8_15_AATCCAGGTCTAGCCG	8.30343	-0.973477	stromal_cell
cell_10X_P8_15_AATCCAGGTGTGGCTC	-10.977	-0.936234	stromal_cell
cell_10X_P8_15_AATCCAGTCGCGTAGC	-1.88844	-17.9925	stromal_cell
cell_10X_P8_15_AATCGGTAGACAGAGA	-11.9468	-11.1498	stromal_cell
cell_10X_P8_15_AATCGGTAGACGACGT	1.61312	-5.79737	stromal_cell
cell_10X_P8_15_AATCGGTCAAGTCATC	-30.5661	-7.05816	stromal_cell
cell_10X_P8_15_AATCGGTCATACGCCG	-12.6208	-14.144	stromal_cell
cell_10X_P8_15_AATCGGTGTACTTAGC	-11.1243	-21.2921	stromal_cell
cell_10X_P8_15_AATCGGTGTAGTGAAT	8.67444	-9.46557	stromal_cell
cell_10X_P8_15_AATCGGTGTGGTACAG	3.47155	-6.48926	stromal_cell
cell_10X_P8_15_AATCGGTGTTAGTGGG	-24.0687	-4.66614	stromal_cell
cell_10X_P8_15_AATCGGTTCCGTACAA	-33.8379	-11.5736	stromal_cell
cell_10X_P8_15_AATCGGTTCCTGTACC	12.5956	-38.5112	leukocyte
cell_10X_P8_15_AATCGGTTCGACCAGC	3.06898	2.71159	stromal_cell
cell_10X_P8_15_ACACCAAAGCCCAACC	8.62969	-2.31012	stromal_cell
cell_10X_P8_15_ACACCAAAGCTACCGC	-5.96806	-6.39802	stromal_cell
cell_10X_P8_15_ACACCAAAGGCCATAG	-15.3014	-7.44557	stromal_cell
cell_10X_P8_15_ACACCAAAGTACGTTC	-20.0489	-5.30262	stromal_cell
cell_10X_P8_15_ACACCAAAGTTAGGTA	-2.18883	-16.9041	stromal_cell
cell_10X_P8_15_ACACCAAGTCAAAGCG	-34.0602	-11.8767	stromal_cell
cell_10X_P8_15_ACACCAATCACATAGC	-1.74321	-13.5586	stromal_cell
cell_10X_P8_15_ACACCAATCACTCCTG	-36.6626	-6.33503	stromal_cell
cell_10X_P8_15_ACACCAATCACTTCAT	3.44764	-4.20357	stromal_cell
cell_10X_P8_15_ACACCCTAGAAGAAGC	-10.4728	-10.8591	stromal_cell
cell_10X_P8_15_ACACCCTAGCACCGTC	2.44123	1.09794	stromal_cell
cell_10X_P8_15_ACACCCTAGGCGATAC	6.40741	-2.94577	stromal_cell
cell_10X_P8_15_ACACCCTAGTTCGATC	-33.1122	-8.95249	stromal_cell
cell_10X_P8_15_ACACCCTCAAGCGATG	-6.93984	-20.9903	stromal_cell
cell_10X_P8_15_ACACCCTCACGTTGGC	-1.79703	-15.8583	stromal_cell
cell_10X_P8_15_ACACCCTCAGCTATTG	3.8063	-9.6653	stromal_cell
cell_10X_P8_15_ACACCCTCATAGAAAC	-4.62266	-9.14067	stromal_cell
cell_10X_P8_15_ACACCCTGTCGTCTTC	4.71238	-0.427965	stromal_cell
cell_10X_P8_15_ACACCCTGTCTAACGT	-18.4125	-20.0976	stromal_cell
cell_10X_P8_15_ACACCCTGTGCGAAAC	-8.49101	-12.6049	stromal_cell
cell_10X_P8_15_ACACCCTGTTAAGTAG	23.8256	5.68371	endothelial_cell
cell_10X_P8_15_ACACCCTGTTCCCGAG	-11.9466	-3.24079	stromal_cell
cell_10X_P8_15_ACACCCTGTTGCCTCT	16.2037	-47.9496	leukocyte
cell_10X_P8_15_ACACCCTTCGGGAGTA	3.14297	2.95978	stromal_cell
cell_10X_P8_15_ACACCCTTCTCTGAGA	10.1828	-4.865	stromal_cell
cell_10X_P8_15_ACACCGGAGCACAGGT	1.47019	-10.4838	stromal_cell
cell_10X_P8_15_ACACCGGAGCCACCTG	-2.18346	-6.98363	stromal_cell
cell_10X_P8_15_ACACCGGAGGTGATTA	-24.2665	-1.22621	stromal_cell
cell_10X_P8_15_ACACCGGAGGTGCTTT	-10.0526	-10.8786	stromal_cell
cell_10X_P8_15_ACACCGGCACGGCGTT	2.79368	-5.45532	stromal_cell
cell_10X_P8_15_ACACCGGCATAGTAAG	6.91665	-7.98929	stromal_cell
cell_10X_P8_15_ACACCGGGTAGCTAAA	-0.0585632	-15.7222	stromal_cell
cell_10X_P8_15_ACACCGGGTATATGGA	4.79961	-10.2343	stromal_cell
cell_10X_P8_15_ACACCGGTCATGTGGT	5.06833	-0.426851	stromal_cell
cell_10X_P8_15_ACACCGGTCTGATACG	-21.8867	-9.49258	stromal_cell
cell_10X_P8_15_ACACTGAAGTAAGTAC	0.760807	-5.02808	stromal_cell
cell_10X_P8_15_ACACTGAAGTGAACGC	-13.8806	-12.1812	stromal_cell
cell_10X_P8_15_ACACTGAAGTGTTGAA	-7.35699	-17.7725	stromal_cell
cell_10X_P8_15_ACACTGACACAGATTC	-4.44559	-5.24278	stromal_cell
cell_10X_P8_15_ACACTGACACGAAACG	-7.17493	-21.7465	stromal_cell
cell_10X_P8_15_ACACTGACAGGGTACA	6.59689	-2.92952	stromal_cell
cell_10X_P8_15_ACACTGAGTCTCTCTG	-18.1568	-12.1013	stromal_cell
cell_10X_P8_15_ACACTGAGTTCTGTTT	-34.5981	-7.18625	stromal_cell
cell_10X_P8_15_ACAGCCGAGGCATGTG	-22.8386	-8.34562	stromal_cell
cell_10X_P8_15_ACAGCCGAGTTAGGTA	-13.6277	-10.9926	stromal_cell
cell_10X_P8_15_ACAGCCGCACCAGCAC	-31.0292	-8.2341	stromal_cell
cell_10X_P8_15_ACAGCCGCAGTCCTTC	-9.83748	-0.82357	stromal_cell
cell_10X_P8_15_ACAGCCGTCAGCCTAA	7.2437	-3.37365	stromal_cell
cell_10X_P8_15_ACAGCCGTCAGTCAGT	25.1152	9.22045	endothelial_cell
cell_10X_P8_15_ACAGCCGTCCGTCATC	-2.10308	-8.18015	stromal_cell
cell_10X_P8_15_ACAGCCGTCTCTTATG	10.7879	-2.98749	stromal_cell
cell_10X_P8_15_ACAGCTAAGAATTCCC	8.60181	-43.4728	leukocyte
cell_10X_P8_15_ACAGCTACACCCAGTG	-12.484	-19.5416	stromal_cell
cell_10X_P8_15_ACAGCTAGTACTCTCC	11.1822	-1.89715	stromal_cell
cell_10X_P8_15_ACAGCTATCACTTCAT	2.45312	-8.4673	stromal_cell
cell_10X_P8_15_ACAGCTATCAGCACAT	-10.8355	-2.54922	stromal_cell
cell_10X_P8_15_ACAGCTATCAGGATCT	-4.15373	-13.7236	stromal_cell
cell_10X_P8_15_ACAGCTATCCAGAGGA	-34.2718	-10.5235	stromal_cell
cell_10X_P8_15_ACAGCTATCCGTCAAA	-2.18356	-5.05847	stromal_cell
cell_10X_P8_15_ACAGCTATCGCAAACT	11.9325	-44.6438	leukocyte
cell_10X_P8_15_ACAGCTATCGGCGGTT	2.0731	-5.15135	stromal_cell
cell_10X_P8_15_ACATACGAGAAACCTA	9.20296	-7.51933	stromal_cell
cell_10X_P8_15_ACATACGAGATAGCAT	26.9013	14.5704	endothelial_cell
cell_10X_P8_15_ACATACGAGGGTGTGT	-14.4979	-15.1636	stromal_cell
cell_10X_P8_15_ACATACGAGTCCATAC	-26.9849	-18.8966	stromal_cell
cell_10X_P8_15_ACATACGCAAATTGCC	-14.5996	-11.1896	stromal_cell
cell_10X_P8_15_ACATACGCACGGCCAT	-6.65442	-13.3284	stromal_cell
cell_10X_P8_15_ACATACGGTATATCCG	-1.78045	-9.36178	stromal_cell
cell_10X_P8_15_ACATACGTCAGCGATT	-17.3278	-3.84723	stromal_cell
cell_10X_P8_15_ACATACGTCCGCGGTA	50.379	-18.0768	epithelial_cell
cell_10X_P8_15_ACATACGTCGCGCCAA	-2.19001	-10.693	stromal_cell
cell_10X_P8_15_ACATCAGCACTGCCAG	5.97038	-6.62395	stromal_cell
cell_10X_P8_15_ACATCAGCAGACGCAA	8.25558	-46.9187	leukocyte
cell_10X_P8_15_ACATCAGCATGCCTAA	3.91409	-8.7401	stromal_cell
cell_10X_P8_15_ACATCAGGTCTCTTTA	7.91389	-6.36411	stromal_cell
cell_10X_P8_15_ACATCAGGTGACTCAT	-5.40774	-17.5035	stromal_cell
cell_10X_P8_15_ACATCAGGTGTGCGTC	46.4611	-17.193	epithelial_cell
cell_10X_P8_15_ACATCAGTCAAGGTAA	-18.3198	-14.6058	stromal_cell
cell_10X_P8_15_ACATCAGTCGGCTTGG	-11.5065	-18.224	stromal_cell
cell_10X_P8_15_ACATGGTCAAGAAAGG	-36.4394	-6.71727	stromal_cell
cell_10X_P8_15_ACATGGTCAATCTACG	-4.03854	-15.5776	stromal_cell
cell_10X_P8_15_ACATGGTCAGACACTT	-5.98495	-22.8368	stromal_cell
cell_10X_P8_15_ACATGGTCATCTCCCA	-4.69305	-7.89191	stromal_cell
cell_10X_P8_15_ACATGGTCATTAACCG	14.5177	-34.3825	leukocyte
cell_10X_P8_15_ACATGGTGTGTTTGTG	-6.09938	-23.104	stromal_cell
cell_10X_P8_15_ACATGGTTCTCGCTTG	-3.93991	-1.36096	stromal_cell
cell_10X_P8_15_ACATGGTTCTGCAAGT	-10.7388	-9.76724	stromal_cell
cell_10X_P8_15_ACCAGTAAGCGGCTTC	-30.6621	-12.5495	stromal_cell
cell_10X_P8_15_ACCAGTACAGACACTT	-27.4019	-19.9013	stromal_cell
cell_10X_P8_15_ACCAGTAGTAAATGTG	-5.77609	-3.94443	stromal_cell
cell_10X_P8_15_ACCAGTAGTAATCACC	-19.0759	-18.0268	stromal_cell
cell_10X_P8_15_ACCAGTAGTCTCGTTC	0.0366823	2.3744	stromal_cell
cell_10X_P8_15_ACCAGTATCCCTAACC	4.37519	2.14032	endothelial_cell
cell_10X_P8_15_ACCAGTATCTACTCAT	0.108426	-17.5821	stromal_cell
cell_10X_P8_15_ACCCACTCAATGGATA	-11.0413	-4.74152	stromal_cell
cell_10X_P8_15_ACCCACTCAGATGGCA	23.1323	-2.99496	endothelial_cell
cell_10X_P8_15_ACCCACTGTTGACGTT	20.9053	-3.50841	endothelial_cell
cell_10X_P8_15_ACCCACTTCGCACTCT	-0.7698	-7.42699	stromal_cell
cell_10X_P8_15_ACCCACTTCGGATGTT	-13.3944	-6.1707	stromal_cell
cell_10X_P8_15_ACCCACTTCGTCACGG	14.2511	-35.4059	leukocyte
cell_10X_P8_15_ACCGTAAAGAAACGAG	10.6198	-48.6718	leukocyte
cell_10X_P8_15_ACCGTAAAGCCAGGAT	4.51898	0.450046	stromal_cell
cell_10X_P8_15_ACCGTAAAGGCATGTG	42.179	-14.2614	epithelial_cell
cell_10X_P8_15_ACCGTAAAGGGTTCCC	-4.45891	-9.34339	stromal_cell
cell_10X_P8_15_ACCGTAACAAGTTCTG	-36.658	-16.8302	stromal_cell
cell_10X_P8_15_ACCGTAACACGGCTAC	-35.1571	-9.85175	stromal_cell
cell_10X_P8_15_ACCGTAAGTTATTCTC	25.5606	8.31483	endothelial_cell
cell_10X_P8_15_ACCGTAATCAATCACG	2.77468	-15.2111	stromal_cell
cell_10X_P8_15_ACCGTAATCAGATAAG	12.4055	-32.0124	leukocyte
cell_10X_P8_15_ACCGTAATCGAACGGA	-4.48746	-11.1401	stromal_cell
cell_10X_P8_15_ACCGTAATCGCCATAA	10.0818	-3.65656	stromal_cell
cell_10X_P8_15_ACCGTAATCGTTACAG	-5.61213	-3.47188	stromal_cell
cell_10X_P8_15_ACCTTTACAAGGTGTG	-21.0396	-18.3632	stromal_cell
cell_10X_P8_15_ACCTTTAGTAGGGTAC	-16.0605	-16.3497	stromal_cell
cell_10X_P8_15_ACCTTTAGTCCTCCAT	5.76694	-6.06025	stromal_cell
cell_10X_P8_15_ACCTTTAGTGCGGTAA	-4.8007	-13.269	stromal_cell
cell_10X_P8_15_ACCTTTAGTGGTAACG	11.8566	-3.1892	stromal_cell
cell_10X_P8_15_ACCTTTATCGTCTGAA	-14.5509	-8.46111	stromal_cell
cell_10X_P8_15_ACGAGCCAGACGCTTT	-6.81135	-17.5066	stromal_cell
cell_10X_P8_15_ACGAGCCAGACTGGGT	-4.61444	-8.71116	stromal_cell
cell_10X_P8_15_ACGAGCCAGGATATAC	-30.0784	-21.813	stromal_cell
cell_10X_P8_15_ACGAGCCCACATCTTT	-9.1852	-21.2956	stromal_cell
cell_10X_P8_15_ACGAGCCCATCCCACT	-33.4797	-16.5993	stromal_cell
cell_10X_P8_15_ACGAGCCCATTGCGGC	-0.789874	-10.0769	stromal_cell
cell_10X_P8_15_ACGAGCCCATTTGCTT	-31.2199	-7.74264	stromal_cell
cell_10X_P8_15_ACGAGCCGTCACCTAA	-5.63167	-10.8457	stromal_cell
cell_10X_P8_15_ACGAGCCGTGCGATAG	1.02765	-7.47685	stromal_cell
cell_10X_P8_15_ACGAGCCTCCTAAGTG	-2.05223	-14.2296	stromal_cell
cell_10X_P8_15_ACGAGCCTCTGGTTCC	10.0033	-8.90424	stromal_cell
cell_10X_P8_15_ACGAGGAAGCCAACAG	-30.7105	-12.8551	stromal_cell
cell_10X_P8_15_ACGAGGACACTAAGTC	-26.9917	-19.509	stromal_cell
cell_10X_P8_15_ACGAGGACAGACAAGC	8.9965	-49.0355	leukocyte
cell_10X_P8_15_ACGAGGAGTTATCGGT	-24.0103	-7.15963	stromal_cell
cell_10X_P8_15_ACGAGGAGTTCAACCA	-12.5444	-10.3569	stromal_cell
cell_10X_P8_15_ACGAGGATCACGAAGG	8.79975	-45.7377	leukocyte
cell_10X_P8_15_ACGAGGATCGTACCGG	-27.421	-6.71579	stromal_cell
cell_10X_P8_15_ACGATACAGCACCGCT	8.14409	1.08845	stromal_cell
cell_10X_P8_15_ACGATACAGCGAAGGG	50.4451	-19.4153	epithelial_cell
cell_10X_P8_15_ACGATACAGTGGAGTC	4.55416	-1.16534	stromal_cell
cell_10X_P8_15_ACGATACCACGAGAGT	-34.6055	-15.677	stromal_cell
cell_10X_P8_15_ACGATACCATCCAACA	-14.7201	-18.2148	stromal_cell
cell_10X_P8_15_ACGATACCATGGTCTA	-1.57697	-13.4334	stromal_cell
cell_10X_P8_15_ACGATACGTGTTCGAT	-14.2492	-9.92395	stromal_cell
cell_10X_P8_15_ACGATACTCGGAGGTA	0.731243	-4.72041	stromal_cell
cell_10X_P8_15_ACGATGTAGACAATAC	-36.2117	-20.5515	stromal_cell
cell_10X_P8_15_ACGATGTCAACACCCG	-7.61731	-13.4307	stromal_cell
cell_10X_P8_15_ACGATGTCAATGAATG	-9.36675	-3.05228	stromal_cell
cell_10X_P8_15_ACGATGTCACGTTGGC	-8.73653	-5.62444	stromal_cell
cell_10X_P8_15_ACGATGTCATTTGCTT	7.17348	-8.50257	stromal_cell
cell_10X_P8_15_ACGATGTTCAAGATCC	-11.8164	-11.5183	stromal_cell
cell_10X_P8_15_ACGATGTTCCAAGCCG	-11.5893	-6.59255	stromal_cell
cell_10X_P8_15_ACGATGTTCTCGAGTA	-1.17307	-0.353798	stromal_cell
cell_10X_P8_15_ACGCAGCAGCGACGTA	23.4829	5.49968	endothelial_cell
cell_10X_P8_15_ACGCAGCAGCTACCGC	-14.6282	-3.75716	stromal_cell
cell_10X_P8_15_ACGCAGCAGTTTCCTT	-21.9613	-10.626	stromal_cell
cell_10X_P8_15_ACGCAGCCACCAGTTA	-21.7565	-20.1354	stromal_cell
cell_10X_P8_15_ACGCAGCCACGTAAGG	-23.7261	-10.1576	stromal_cell
cell_10X_P8_15_ACGCAGCCAGGGTATG	-8.11747	0.0403425	stromal_cell
cell_10X_P8_15_ACGCAGCCAGGGTTAG	5.89734	0.396788	stromal_cell
cell_10X_P8_15_ACGCAGCCATCCGGGT	-9.29922	-4.20964	stromal_cell
cell_10X_P8_15_ACGCAGCCATCGACGC	-12.7656	-12.2743	stromal_cell
cell_10X_P8_15_ACGCAGCCATTTCACT	9.53735	-44.2484	leukocyte
cell_10X_P8_15_ACGCAGCGTCATTAGC	-4.22737	-18.806	stromal_cell
cell_10X_P8_15_ACGCAGCGTGTCAATC	-29.1357	-13.048	stromal_cell
cell_10X_P8_15_ACGCCAGAGTGGAGAA	-36.4021	-9.13621	stromal_cell
cell_10X_P8_15_ACGCCAGCATGACATC	-30.6295	-5.5957	stromal_cell
cell_10X_P8_15_ACGCCAGGTCCGAAGA	-8.18099	-0.399782	stromal_cell
cell_10X_P8_15_ACGCCAGGTGAGTGAC	11.1925	-0.919339	stromal_cell
cell_10X_P8_15_ACGCCAGGTTACAGAA	-14.0348	-15.8627	stromal_cell
cell_10X_P8_15_ACGCCAGGTTCAGGCC	5.44451	0.412585	stromal_cell
cell_10X_P8_15_ACGCCAGGTTGAGTTC	-37.4255	-10.4944	stromal_cell
cell_10X_P8_15_ACGCCAGGTTGGAGGT	10.2715	-2.08841	stromal_cell
cell_10X_P8_15_ACGCCAGTCGGTCTAA	-10.2487	0.00844363	stromal_cell
cell_10X_P8_15_ACGCCAGTCTCACATT	-6.54646	-3.47176	stromal_cell
cell_10X_P8_15_ACGCCAGTCTCTAGGA	-3.18545	-0.580546	stromal_cell
cell_10X_P8_15_ACGCCGAAGATCGATA	3.17377	-11.0212	stromal_cell
cell_10X_P8_15_ACGCCGAAGGTGCACA	14.4995	-34.7941	leukocyte
cell_10X_P8_15_ACGCCGACAGACAAAT	-11.1628	-3.28005	stromal_cell
cell_10X_P8_15_ACGCCGACAGTGAGTG	-28.72	-12.3694	stromal_cell
cell_10X_P8_15_ACGCCGACATGCCTTC	-32.3498	-10.852	stromal_cell
cell_10X_P8_15_ACGCCGACATGGTCTA	10.8074	-1.4058	stromal_cell
cell_10X_P8_15_ACGCCGAGTGAGGCTA	-21.6754	-7.96207	stromal_cell
cell_10X_P8_15_ACGCCGATCGGCTTGG	-2.59753	-2.82924	stromal_cell
cell_10X_P8_15_ACGGAGAAGCATCATC	-10.9983	-7.7111	stromal_cell
cell_10X_P8_15_ACGGAGAAGCCAGGAT	-0.176641	-48.8854	endothelial_cell
cell_10X_P8_15_ACGGAGAAGCGTGTCC	9.73593	-40.5563	leukocyte
cell_10X_P8_15_ACGGAGAAGTAGGTGC	-16.306	-20.5412	stromal_cell
cell_10X_P8_15_ACGGAGAAGTGGAGTC	9.17978	-38.7939	leukocyte
cell_10X_P8_15_ACGGAGAGTCCTAGCG	1.80203	-2.59938	stromal_cell
cell_10X_P8_15_ACGGAGAGTCGACTGC	-15.27	-3.67406	stromal_cell
cell_10X_P8_15_ACGGAGATCCTGTAGA	-6.55673	-12.1828	stromal_cell
cell_10X_P8_15_ACGGCCAAGATGCCAG	-7.30113	-15.1073	stromal_cell
cell_10X_P8_15_ACGGCCAAGCTGCCCA	-37.1136	-10.3075	stromal_cell
cell_10X_P8_15_ACGGCCAAGTGTACCT	-23.5204	-5.23557	stromal_cell
cell_10X_P8_15_ACGGCCACAATGAAAC	-34.9939	-7.79211	stromal_cell
cell_10X_P8_15_ACGGCCACAGCCTATA	2.03484	-15.4513	stromal_cell
cell_10X_P8_15_ACGGCCACAGCCTGTG	2.3496	-1.80644	stromal_cell
cell_10X_P8_15_ACGGCCACATCATCCC	-32.4855	-9.77839	stromal_cell
cell_10X_P8_15_ACGGCCACATTCTCAT	7.35155	-7.31513	stromal_cell
cell_10X_P8_15_ACGGCCAGTGCCTGGT	7.92091	8.08557	neuroendocrine_cell
cell_10X_P8_15_ACGGGCTAGCTCTCGG	11.1293	-1.64458	stromal_cell
cell_10X_P8_15_ACGGGCTTCATCGCTC	-3.99737	-11.3538	stromal_cell
cell_10X_P8_15_ACGGGCTTCGAACTGT	-12.4549	-14.0532	stromal_cell
cell_10X_P8_15_ACGGGCTTCGAGGTAG	3.29654	-11.2765	stromal_cell
cell_10X_P8_15_ACGGGCTTCTGCCCTA	-23.4478	-19.1166	stromal_cell
cell_10X_P8_15_ACGGGTCAGAGGTTGC	-22.3093	-6.16487	stromal_cell
cell_10X_P8_15_ACGGGTCAGCGTGTCC	8.83306	-4.84027	stromal_cell
cell_10X_P8_15_ACGGGTCAGTTAAGTG	11.8963	-38.8955	leukocyte
cell_10X_P8_15_ACGGGTCCACATAACC	5.1873	1.35204	stromal_cell
cell_10X_P8_15_ACGGGTCCACCATGTA	5.64128	-9.96009	stromal_cell
cell_10X_P8_15_ACGGGTCCACCCTATC	-37.5064	-12.3802	stromal_cell
cell_10X_P8_15_ACGGGTCCACGTGAGA	-12.1324	-8.58065	stromal_cell
cell_10X_P8_15_ACGGGTCCATAAGACA	8.52117	-8.48513	stromal_cell
cell_10X_P8_15_ACGGGTCGTACTTGAC	24.2892	5.61195	endothelial_cell
cell_10X_P8_15_ACGGGTCTCTATGTGG	8.09942	-5.04145	stromal_cell
cell_10X_P8_15_ACGTCAAAGAGAACAG	1.32957	-11.9299	stromal_cell
cell_10X_P8_15_ACGTCAAAGCACCGTC	24.123	5.23906	endothelial_cell
cell_10X_P8_15_ACGTCAAAGCTATGCT	-11.4589	-18.9449	stromal_cell
cell_10X_P8_15_ACGTCAACAAGTAATG	-0.652847	-44.9121	neuroendocrine_cell
cell_10X_P8_15_ACGTCAACAATAAGCA	8.50737	-9.62866	stromal_cell
cell_10X_P8_15_ACGTCAACACCAACCG	47.1237	-17.7216	epithelial_cell
cell_10X_P8_15_ACGTCAACACCGAATT	-33.0569	-15.4104	stromal_cell
cell_10X_P8_15_ACGTCAACAGCTGTAT	-10.497	-5.45849	stromal_cell
cell_10X_P8_15_ACGTCAAGTAAACGCG	-33.6842	-6.90873	stromal_cell
cell_10X_P8_15_ACGTCAAGTAAGAGGA	-4.48423	-8.6035	stromal_cell
cell_10X_P8_15_ACGTCAATCCCAACGG	5.5687	-6.85577	stromal_cell
cell_10X_P8_15_ACGTCAATCGAATGCT	2.84435	-1.47629	stromal_cell
cell_10X_P8_15_ACTATCTAGACGCACA	-1.49879	-15.235	stromal_cell
cell_10X_P8_15_ACTATCTAGAGTAAGG	-3.87866	-0.056253	stromal_cell
cell_10X_P8_15_ACTATCTAGCACCGCT	9.35108	-6.33458	stromal_cell
cell_10X_P8_15_ACTATCTAGGCCCTTG	-20.1555	-8.39852	stromal_cell
cell_10X_P8_15_ACTATCTAGGCTCATT	11.1921	-45.0647	leukocyte
cell_10X_P8_15_ACTATCTAGGTAGCTG	-8.74836	-15.5984	stromal_cell
cell_10X_P8_15_ACTATCTCAAAGCGGT	5.44321	-9.70742	stromal_cell
cell_10X_P8_15_ACTATCTCACATTCGA	5.11799	-13.2084	stromal_cell
cell_10X_P8_15_ACTATCTCACGACTCG	-22.2671	-17.6176	stromal_cell
cell_10X_P8_15_ACTATCTCATAGACTC	-7.08272	-15.3287	stromal_cell
cell_10X_P8_15_ACTATCTCATCACCCT	-33.4812	-12.5113	stromal_cell
cell_10X_P8_15_ACTATCTCATCCGTGG	-12.1738	-18.2291	stromal_cell
cell_10X_P8_15_ACTATCTGTCCCTACT	-9.42527	-11.9058	stromal_cell
cell_10X_P8_15_ACTATCTGTCGCGGTT	0.591376	-16.7809	stromal_cell
cell_10X_P8_15_ACTATCTGTGAGTATA	24.512	10.2087	endothelial_cell
cell_10X_P8_15_ACTATCTGTGCGAAAC	-29.0365	-7.93131	stromal_cell
cell_10X_P8_15_ACTATCTGTTAAAGTG	-32.9737	-16.6674	stromal_cell
cell_10X_P8_15_ACTATCTGTTCCACTC	-4.47777	-9.76303	stromal_cell
cell_10X_P8_15_ACTATCTGTTGAACTC	4.99765	-8.06515	stromal_cell
cell_10X_P8_15_ACTATCTTCAGCTTAG	-1.22273	-14.3824	stromal_cell
cell_10X_P8_15_ACTATCTTCTGCGACG	2.82875	-11.2835	stromal_cell
cell_10X_P8_15_ACTGAACAGTCCCACG	-0.404306	-8.72014	stromal_cell
cell_10X_P8_15_ACTGAACAGTCGATAA	-0.664664	-47.5911	neuroendocrine_cell
cell_10X_P8_15_ACTGAACCAACGCACC	2.02499	-7.02414	stromal_cell
cell_10X_P8_15_ACTGAACCAATAAGCA	4.17745	-8.2483	stromal_cell
cell_10X_P8_15_ACTGAACCACCGAAAG	-2.4719	-2.03565	stromal_cell
cell_10X_P8_15_ACTGAACCATCCGGGT	4.73745	-0.284216	stromal_cell
cell_10X_P8_15_ACTGAACGTAGCGATG	5.53112	-7.17874	stromal_cell
cell_10X_P8_15_ACTGAACGTAGTAGTA	-33.5473	-11.5472	stromal_cell
cell_10X_P8_15_ACTGAACTCATACGGT	-13.6129	-8.92899	stromal_cell
cell_10X_P8_15_ACTGAACTCCGGGTGT	19.2758	-44.7477	epithelial_cell
cell_10X_P8_15_ACTGAACTCTCGGACG	11.6505	-50.0095	leukocyte
cell_10X_P8_15_ACTGAACTCTTTAGGG	-4.7739	-1.51339	stromal_cell
cell_10X_P8_15_ACTGAGTAGCACAGGT	5.97418	-6.1492	stromal_cell
cell_10X_P8_15_ACTGAGTCATCCGGGT	-36.1929	-12.3899	stromal_cell
cell_10X_P8_15_ACTGAGTTCTAACTGG	-11.5523	-19.3394	stromal_cell
cell_10X_P8_15_ACTGAGTTCTGAAAGA	0.799715	-7.89435	stromal_cell
cell_10X_P8_15_ACTGATGAGACAGAGA	-7.2838	-21.4028	stromal_cell
cell_10X_P8_15_ACTGATGCAGCCTGTG	8.02291	8.93897	neuroendocrine_cell
cell_10X_P8_15_ACTGATGCAGTTCCCT	-7.07145	-19.3088	stromal_cell
cell_10X_P8_15_ACTGATGCATGCCCGA	4.99871	-9.36476	stromal_cell
cell_10X_P8_15_ACTGATGCATTTGCTT	46.6575	-17.157	epithelial_cell
cell_10X_P8_15_ACTGATGGTAAACACA	-31.7212	-6.98345	stromal_cell
cell_10X_P8_15_ACTGATGGTGAGTGAC	47.147	-15.4211	epithelial_cell
cell_10X_P8_15_ACTGATGTCATCGGAT	-33.8957	-17.3513	stromal_cell
cell_10X_P8_15_ACTGATGTCCAACCAA	-35.8595	-12.5029	stromal_cell
cell_10X_P8_15_ACTGATGTCTGCGACG	-31.1498	-5.92057	stromal_cell
cell_10X_P8_15_ACTGCTCAGCACCGCT	-0.450242	-13.7084	stromal_cell
cell_10X_P8_15_ACTGCTCAGTCCGTAT	10.6582	-45.4289	leukocyte
cell_10X_P8_15_ACTGCTCCAACTGCTA	-14.2963	-4.47883	stromal_cell
cell_10X_P8_15_ACTGCTCCAAGTCATC	-12.2968	-18.5975	stromal_cell
cell_10X_P8_15_ACTGCTCCACTCGACG	-20.089	-5.25841	stromal_cell
cell_10X_P8_15_ACTGCTCCAGAGCCAA	1.55558	-4.48998	stromal_cell
cell_10X_P8_15_ACTGCTCCAGCTGTTA	-2.40381	-4.76955	stromal_cell
cell_10X_P8_15_ACTGCTCCATTGGTAC	6.89715	-6.51578	stromal_cell
cell_10X_P8_15_ACTGCTCGTCCCGACA	42.162	-14.0484	epithelial_cell
cell_10X_P8_15_ACTGCTCGTGCCTTGG	-6.90395	-15.5308	stromal_cell
cell_10X_P8_15_ACTGCTCGTGCGGTAA	-1.34174	-9.67171	stromal_cell
cell_10X_P8_15_ACTGCTCTCAGCTCGG	7.84972	-6.26042	stromal_cell
cell_10X_P8_15_ACTGCTCTCCCAGGTG	7.10639	9.75281	neuroendocrine_cell
cell_10X_P8_15_ACTGCTCTCCGCAGTG	-12.0342	-14.7606	stromal_cell
cell_10X_P8_15_ACTGCTCTCGGCGCTA	48.719	-17.8463	epithelial_cell
cell_10X_P8_15_ACTGTCCAGATCTGCT	-22.915	-5.54566	stromal_cell
cell_10X_P8_15_ACTGTCCAGGCTACGA	-10.3131	0.171757	stromal_cell
cell_10X_P8_15_ACTGTCCAGTATCTCG	-3.20563	-0.889162	stromal_cell
cell_10X_P8_15_ACTGTCCAGTCGTTTG	3.8497	-9.28816	stromal_cell
cell_10X_P8_15_ACTGTCCCATATGGTC	-14.2335	-14.1227	stromal_cell
cell_10X_P8_15_ACTGTCCGTACAAGTA	24.8838	14.4602	endothelial_cell
cell_10X_P8_15_ACTGTCCGTCAAAGAT	-32.5397	-21.9884	stromal_cell
cell_10X_P8_15_ACTGTCCTCATCGATG	-3.6641	-0.871943	stromal_cell
cell_10X_P8_15_ACTGTCCTCCAACCAA	-31.0847	-7.94156	stromal_cell
cell_10X_P8_15_ACTGTCCTCTTCGAGA	-15.613	2.18054	neuroendocrine_cell
cell_10X_P8_15_ACTTACTAGAACAACT	-15.5311	-12.0426	stromal_cell
cell_10X_P8_15_ACTTACTAGCCACTAT	9.69147	-38.6019	leukocyte
cell_10X_P8_15_ACTTACTCATTTCACT	42.2373	-13.4714	epithelial_cell
cell_10X_P8_15_ACTTACTGTCCGAAGA	2.15024	-6.98532	stromal_cell
cell_10X_P8_15_ACTTACTTCGATAGAA	19.6615	-44.3977	neuroendocrine_cell
cell_10X_P8_15_ACTTACTTCGTTGCCT	49.9315	-18.4602	epithelial_cell
cell_10X_P8_15_ACTTACTTCTTAGAGC	-6.02973	-14.9844	stromal_cell
cell_10X_P8_15_ACTTGTTAGCTGAACG	-6.61497	-18.1616	stromal_cell
cell_10X_P8_15_ACTTGTTAGCTGGAAC	-1.0905	-6.41951	stromal_cell
cell_10X_P8_15_ACTTGTTCATGCAACT	-4.08208	-16.7329	stromal_cell
cell_10X_P8_15_ACTTGTTCATGCCTAA	-1.42921	-17.6347	stromal_cell
cell_10X_P8_15_ACTTGTTGTTAAGGGC	0.15451	-4.57049	stromal_cell
cell_10X_P8_15_ACTTGTTTCCGCGGTA	-37.8803	-18.3172	stromal_cell
cell_10X_P8_15_ACTTTCAAGACTAAGT	-7.54629	-14.864	stromal_cell
cell_10X_P8_15_ACTTTCAAGCCCGAAA	-18.7014	-18.1417	stromal_cell
cell_10X_P8_15_ACTTTCAAGTTCCACA	-3.53456	-4.17325	stromal_cell
cell_10X_P8_15_ACTTTCACACCGCTAG	4.16332	-11.2288	stromal_cell
cell_10X_P8_15_ACTTTCACACTTAACG	4.48316	-0.0403338	stromal_cell
cell_10X_P8_15_ACTTTCACAGCCTGTG	-5.66572	-2.19495	stromal_cell
cell_10X_P8_15_ACTTTCAGTTGTGGAG	-34.1624	-15.7883	stromal_cell
cell_10X_P8_15_ACTTTCATCCCTAACC	-13.9594	-8.05101	stromal_cell
cell_10X_P8_15_ACTTTCATCGAACTGT	-9.90983	-8.79132	stromal_cell
cell_10X_P8_15_ACTTTCATCGAATGGG	22.5758	2.09756	endothelial_cell
cell_10X_P8_15_ACTTTCATCGTTGCCT	-9.36585	-12.6578	stromal_cell
cell_10X_P8_15_ACTTTCATCTAACGGT	-10.5568	-17.4524	stromal_cell
cell_10X_P8_15_ACTTTCATCTGTTTGT	42.3764	-14.2733	epithelial_cell
cell_10X_P8_15_AGAATAGAGCTGTCTA	42.3477	-14.3245	epithelial_cell
cell_10X_P8_15_AGAATAGAGGGTTTCT	-14.7805	-12.7447	stromal_cell
cell_10X_P8_15_AGAATAGAGTCGTACT	-31.7306	-21.3667	stromal_cell
cell_10X_P8_15_AGAATAGCAAAGAATC	-3.6234	-0.355394	stromal_cell
cell_10X_P8_15_AGAATAGCAAGCCGCT	3.96476	2.46411	stromal_cell
cell_10X_P8_15_AGAATAGCAGTATCTG	-26.4148	-3.37375	stromal_cell
cell_10X_P8_15_AGAATAGCATCGACGC	-14.7263	-12.7398	stromal_cell
cell_10X_P8_15_AGAATAGCATGAGCGA	-29.903	-5.41646	stromal_cell
cell_10X_P8_15_AGAATAGGTAGGCTGA	-9.25224	-13.4866	stromal_cell
cell_10X_P8_15_AGAATAGTCCGAAGAG	48.5248	-17.2943	epithelial_cell
cell_10X_P8_15_AGACGTTAGCCCGAAA	-5.1824	-4.68359	stromal_cell
cell_10X_P8_15_AGACGTTAGTGGGCTA	-31.6367	-6.65186	stromal_cell
cell_10X_P8_15_AGACGTTCAAAGGTGC	-28.947	-12.0679	stromal_cell
cell_10X_P8_15_AGACGTTCAAGGGTCA	-26.9623	-19.3279	stromal_cell
cell_10X_P8_15_AGACGTTCACATTCGA	-2.4567	-18.9979	stromal_cell
cell_10X_P8_15_AGACGTTCAGGATCGA	-15.7893	-5.2242	stromal_cell
cell_10X_P8_15_AGACGTTTCTAGCACA	21.0409	-1.62735	endothelial_cell
cell_10X_P8_15_AGAGCGAAGTACATGA	6.6882	-3.11222	stromal_cell
cell_10X_P8_15_AGAGCGACAAGAAAGG	-23.5637	-11.2387	stromal_cell
cell_10X_P8_15_AGAGCGACACGGCCAT	-27.8699	-12.5731	stromal_cell
cell_10X_P8_15_AGAGCGACAGCTATTG	8.90357	-6.27381	stromal_cell
cell_10X_P8_15_AGAGCGAGTCGGGTCT	6.34433	-7.58331	stromal_cell
cell_10X_P8_15_AGAGCGAGTTCCAACA	-6.11426	-6.75366	stromal_cell
cell_10X_P8_15_AGAGCTTAGACTGTAA	7.77765	8.624	neuroendocrine_cell
cell_10X_P8_15_AGAGCTTAGTTCGCAT	-20.3913	-2.37829	stromal_cell
cell_10X_P8_15_AGAGCTTCATCCGGGT	-2.99013	1.07512	stromal_cell
cell_10X_P8_15_AGAGCTTGTGCAACTT	-6.73366	-21.3032	stromal_cell
cell_10X_P8_15_AGAGCTTTCGATCCCT	10.5516	-1.43327	stromal_cell
cell_10X_P8_15_AGAGTGGAGAGAGCTC	11.1195	-47.8439	leukocyte
cell_10X_P8_15_AGAGTGGAGCACGCCT	10.1673	-5.41052	stromal_cell
cell_10X_P8_15_AGAGTGGAGCTGCCCA	11.0861	-45.2337	leukocyte
cell_10X_P8_15_AGAGTGGCAATTGCTG	5.12821	-13.1305	stromal_cell
cell_10X_P8_15_AGAGTGGCAGCCAGAA	0.35882	-4.75832	stromal_cell
cell_10X_P8_15_AGAGTGGGTAAACACA	-13.1065	-3.16945	stromal_cell
cell_10X_P8_15_AGAGTGGGTCTTGATG	6.0141	-10.4608	stromal_cell
cell_10X_P8_15_AGAGTGGGTTCGCTAA	7.46714	-7.74866	stromal_cell
cell_10X_P8_15_AGAGTGGTCAACGGCC	-27.3401	-6.21846	stromal_cell
cell_10X_P8_15_AGAGTGGTCCAATGGT	10.9648	-40.3438	leukocyte
cell_10X_P8_15_AGAGTGGTCGCCAAAT	-33.6454	-16.0183	stromal_cell
cell_10X_P8_15_AGAGTGGTCGTAGATC	-4.48247	-8.49775	stromal_cell
cell_10X_P8_15_AGAGTGGTCTCGCATC	2.64086	-6.92059	stromal_cell
cell_10X_P8_15_AGAGTGGTCTGCTTGC	-1.71921	-15.2807	stromal_cell
cell_10X_P8_15_AGATCTGAGGCTCTTA	9.0445	-8.5773	stromal_cell
cell_10X_P8_15_AGATCTGAGGGTTTCT	5.20336	-13.7873	stromal_cell
cell_10X_P8_15_AGATCTGAGTTACGGG	-29.1385	-8.11096	stromal_cell
cell_10X_P8_15_AGATCTGCAACGATGG	-30.2849	-21.7062	stromal_cell
cell_10X_P8_15_AGATCTGCATGCCACG	-3.60731	-2.24087	stromal_cell
cell_10X_P8_15_AGATCTGGTAAACACA	-13.4764	-9.70355	stromal_cell
cell_10X_P8_15_AGATCTGGTCCTCCAT	-17.8929	-11.7994	stromal_cell
cell_10X_P8_15_AGATCTGGTTATCCGA	-33.9147	-12.0812	stromal_cell
cell_10X_P8_15_AGATCTGTCTCCGGTT	0.660592	-4.48193	stromal_cell
cell_10X_P8_15_AGATTGCAGACCCACC	4.04831	-9.05057	stromal_cell
cell_10X_P8_15_AGATTGCAGGAATCGC	10.2368	-6.97801	stromal_cell
cell_10X_P8_15_AGATTGCAGTATCTCG	-6.32152	-11.7501	stromal_cell
cell_10X_P8_15_AGATTGCCAATTGCTG	-22.7839	-15.1049	stromal_cell
cell_10X_P8_15_AGATTGCCACGAGGTA	53.2497	-20.2345	epithelial_cell
cell_10X_P8_15_AGATTGCGTCTGGTCG	2.09003	1.27056	stromal_cell
cell_10X_P8_15_AGATTGCGTGCAACGA	26.018	13.9427	endothelial_cell
cell_10X_P8_15_AGATTGCGTGTCAATC	-3.4598	-5.78055	stromal_cell
cell_10X_P8_15_AGATTGCTCCACGTTC	-24.4238	-18.8342	stromal_cell
cell_10X_P8_15_AGATTGCTCGTCCAGG	-3.19731	-16.414	stromal_cell
cell_10X_P8_15_AGCAGCCAGACTAGGC	44.9669	-15.435	epithelial_cell
cell_10X_P8_15_AGCAGCCAGCCTATGT	1.89597	1.20001	stromal_cell
cell_10X_P8_15_AGCAGCCCAATCACAC	-15.2035	-15.4087	stromal_cell
cell_10X_P8_15_AGCAGCCCACCTATCC	7.12997	-1.05528	stromal_cell
cell_10X_P8_15_AGCAGCCCACGGCCAT	-2.85117	-1.35526	stromal_cell
cell_10X_P8_15_AGCAGCCCATAACCTG	-33.4072	-4.49433	stromal_cell
cell_10X_P8_15_AGCAGCCCATCTACGA	0.809287	0.478211	stromal_cell
cell_10X_P8_15_AGCAGCCGTTACAGAA	3.19812	-8.71077	stromal_cell
cell_10X_P8_15_AGCAGCCGTTCCCGAG	-18.8923	-20.7993	stromal_cell
cell_10X_P8_15_AGCAGCCTCAAAGTAG	-29.1535	-15.9044	stromal_cell
cell_10X_P8_15_AGCAGCCTCCTTTCGG	6.47316	-6.55626	stromal_cell
cell_10X_P8_15_AGCAGCCTCGAACGGA	-27.2696	-6.06003	stromal_cell
cell_10X_P8_15_AGCAGCCTCTCAACTT	-26.6774	-12.6832	stromal_cell
cell_10X_P8_15_AGCATACAGATATGGT	6.7726	-6.4233	stromal_cell
cell_10X_P8_15_AGCATACAGCGATTCT	11.7395	-44.2212	leukocyte
cell_10X_P8_15_AGCATACAGGACATTA	-31.4615	-14.8032	stromal_cell
cell_10X_P8_15_AGCATACCATTCTTAC	10.5655	-49.4472	leukocyte
cell_10X_P8_15_AGCATACGTCGTCTTC	-15.3145	-3.43744	stromal_cell
cell_10X_P8_15_AGCATACTCACTCCTG	4.43912	-4.66228	stromal_cell
cell_10X_P8_15_AGCATACTCCTTAATC	9.85591	-44.0053	leukocyte
cell_10X_P8_15_AGCATACTCTCCCTGA	-21.8843	-7.38308	stromal_cell
cell_10X_P8_15_AGCATACTCTGAGTGT	-2.55609	-5.75349	stromal_cell
cell_10X_P8_15_AGCCTAAAGACCTTTG	-5.07045	-9.53845	stromal_cell
cell_10X_P8_15_AGCCTAAAGACGCACA	-11.2456	-3.31823	stromal_cell
cell_10X_P8_15_AGCCTAAAGGCCCTCA	-6.67101	-11.7662	stromal_cell
cell_10X_P8_15_AGCCTAAAGGTACTCT	-7.33505	-3.78904	stromal_cell
cell_10X_P8_15_AGCCTAACACGAAACG	-9.7365	-21.6762	stromal_cell
cell_10X_P8_15_AGCCTAAGTCGACTGC	-1.95269	-1.65652	stromal_cell
cell_10X_P8_15_AGCCTAATCCGCTGTT	-36.1113	-19.449	stromal_cell
cell_10X_P8_15_AGCGGTCAGACGCTTT	20.2483	-42.8515	neuroendocrine_cell
cell_10X_P8_15_AGCGGTCAGATGTCGG	54.834	-19.9784	endothelial_cell
cell_10X_P8_15_AGCGGTCAGGACAGAA	-30.2696	-19.4955	stromal_cell
cell_10X_P8_15_AGCGGTCAGGACGAAA	4.25891	-0.78682	stromal_cell
cell_10X_P8_15_AGCGGTCAGGCGACAT	-3.7639	-2.4272	stromal_cell
cell_10X_P8_15_AGCGGTCCAGTCAGAG	2.14319	-9.99202	stromal_cell
cell_10X_P8_15_AGCGGTCCAGTCGATT	-5.02525	-8.76558	stromal_cell
cell_10X_P8_15_AGCGGTCCATCACCCT	-13.087	-2.97423	stromal_cell
cell_10X_P8_15_AGCGGTCGTCTGCCAG	-12.601	-6.56442	stromal_cell
cell_10X_P8_15_AGCGGTCGTGTGGCTC	9.13826	-8.91928	stromal_cell
cell_10X_P8_15_AGCGGTCGTTCTGGTA	-3.96107	-8.78157	stromal_cell
cell_10X_P8_15_AGCGGTCTCATCGCTC	-1.32055	-12.653	stromal_cell
cell_10X_P8_15_AGCGGTCTCATGTAGC	-6.8816	-12.344	stromal_cell
cell_10X_P8_15_AGCGGTCTCCCATTTA	-4.26875	-15.2838	stromal_cell
cell_10X_P8_15_AGCGTATAGACTGTAA	6.34931	-6.39436	stromal_cell
cell_10X_P8_15_AGCGTATCAACTGGCC	1.12929	-3.12868	stromal_cell
cell_10X_P8_15_AGCGTATCACCCATTC	-34.0054	-12.983	stromal_cell
cell_10X_P8_15_AGCGTATCAGATTGCT	-27.1958	-2.3627	stromal_cell
cell_10X_P8_15_AGCGTATCATCGATTG	1.63767	-3.20043	stromal_cell
cell_10X_P8_15_AGCGTATCATGGGACA	44.5201	-21.2937	epithelial_cell
cell_10X_P8_15_AGCGTATGTGAGGGTT	11.5813	-4.59363	stromal_cell
cell_10X_P8_15_AGCGTATTCCGCATCT	-22.1595	-5.697	stromal_cell
cell_10X_P8_15_AGCGTATTCGTGTAGT	-9.23082	-21.5702	stromal_cell
cell_10X_P8_15_AGCGTCGAGGTCATCT	0.438038	-44.1054	neuroendocrine_cell
cell_10X_P8_15_AGCGTCGAGTGGTAGC	-5.33032	-3.54201	stromal_cell
cell_10X_P8_15_AGCGTCGCAATAGAGT	-16.462	-16.3052	stromal_cell
cell_10X_P8_15_AGCGTCGCACGCGAAA	12.1585	-31.9445	leukocyte
cell_10X_P8_15_AGCGTCGCAGTAAGAT	-33.5585	-7.47726	stromal_cell
cell_10X_P8_15_AGCGTCGCATAACCTG	9.54595	-9.28914	stromal_cell
cell_10X_P8_15_AGCGTCGGTAACGCGA	-32.9271	-11.1857	stromal_cell
cell_10X_P8_15_AGCGTCGGTCTTTCAT	54.285	-19.126	epithelial_cell
cell_10X_P8_15_AGCGTCGGTGTGACGA	6.69393	-48.5664	leukocyte
cell_10X_P8_15_AGCGTCGTCGACGGAA	-33.524	-15.1658	stromal_cell
cell_10X_P8_15_AGCTCCTAGGATTCGG	-25.4504	-3.52884	stromal_cell
cell_10X_P8_15_AGCTCCTAGGCCCTCA	-38.0175	-17.4429	stromal_cell
cell_10X_P8_15_AGCTCCTCAATGAATG	-12.1555	-7.46393	stromal_cell
cell_10X_P8_15_AGCTCCTCACACTGCG	-3.40282	-3.93446	stromal_cell
cell_10X_P8_15_AGCTCCTCAGCCTTTC	3.32979	-7.86531	stromal_cell
cell_10X_P8_15_AGCTCCTGTAGATTAG	-33.9837	-11.6661	stromal_cell
cell_10X_P8_15_AGCTCCTGTATAGGTA	48.359	-16.9241	epithelial_cell
cell_10X_P8_15_AGCTCCTGTCAGAAGC	-0.414035	-48.0762	neuroendocrine_cell
cell_10X_P8_15_AGCTCCTGTCCAACTA	-35.8927	-18.5729	stromal_cell
cell_10X_P8_15_AGCTCCTGTTAAGACA	-37.4599	-13.7246	stromal_cell
cell_10X_P8_15_AGCTCCTTCAGCACAT	2.3705	-9.60704	stromal_cell
cell_10X_P8_15_AGCTCCTTCCTTGCCA	-31.6725	-17.1566	stromal_cell
cell_10X_P8_15_AGCTCCTTCTCGCATC	-24.852	-4.13519	stromal_cell
cell_10X_P8_15_AGCTCTCAGATACACA	11.0353	6.9227	neuroendocrine_cell
cell_10X_P8_15_AGCTCTCAGCGTTGCC	22.3658	9.03852	endothelial_cell
cell_10X_P8_15_AGCTCTCAGTCTCAAC	-32.2236	-7.3325	stromal_cell
cell_10X_P8_15_AGCTCTCCAATGAAAC	-15.8858	-20.1433	stromal_cell
cell_10X_P8_15_AGCTCTCCATGCCTAA	-32.5366	-5.66802	stromal_cell
cell_10X_P8_15_AGCTCTCGTAGCACGA	-9.35004	0.0564116	stromal_cell
cell_10X_P8_15_AGCTCTCGTAGTACCT	-5.53244	-3.61344	stromal_cell
cell_10X_P8_15_AGCTCTCGTCATGCAT	19.792	-45.6528	leukocyte
cell_10X_P8_15_AGCTCTCGTCGCGAAA	3.26091	-12.3742	stromal_cell
cell_10X_P8_15_AGCTCTCTCAAAGTAG	4.39693	0.773566	stromal_cell
cell_10X_P8_15_AGCTCTCTCACCTCGT	42.7054	-14.0574	epithelial_cell
cell_10X_P8_15_AGCTCTCTCGTTGACA	0.56833	-47.4149	neuroendocrine_cell
cell_10X_P8_15_AGCTTGAAGGAATTAC	40.7354	-19.6762	epithelial_cell
cell_10X_P8_15_AGCTTGAAGGACGAAA	-13.4821	-11.3572	stromal_cell
cell_10X_P8_15_AGCTTGAAGGCTCTTA	-31.9406	-1.44284	stromal_cell
cell_10X_P8_15_AGCTTGAAGTCGATAA	8.31859	-43.4791	leukocyte
cell_10X_P8_15_AGCTTGACAGACAAAT	2.1398	-5.00387	stromal_cell
cell_10X_P8_15_AGCTTGAGTATATGAG	-35.8716	-7.94897	stromal_cell
cell_10X_P8_15_AGCTTGAGTGTAATGA	-6.13981	-9.0091	stromal_cell
cell_10X_P8_15_AGCTTGATCACTCTTA	21.7858	-4.17368	endothelial_cell
cell_10X_P8_15_AGCTTGATCTTGTTTG	10.0745	-5.36221	stromal_cell
cell_10X_P8_15_AGGCCACAGGAATTAC	8.94194	-46.4695	leukocyte
cell_10X_P8_15_AGGCCACCAAGTCTAC	-12.1353	-4.63124	stromal_cell
cell_10X_P8_15_AGGCCACGTATGCTTG	-12.3706	-15.5296	stromal_cell
cell_10X_P8_15_AGGCCACGTCCGACGT	13.1445	-34.9689	leukocyte
cell_10X_P8_15_AGGCCACGTCTCTCTG	-3.64027	-0.0141627	stromal_cell
cell_10X_P8_15_AGGCCACGTGAAATCA	4.79137	-2.36254	stromal_cell
cell_10X_P8_15_AGGCCACTCAGTGTTG	48.4708	-18.2135	epithelial_cell
cell_10X_P8_15_AGGCCACTCGTTTATC	5.16109	-2.12698	stromal_cell
cell_10X_P8_15_AGGCCACTCTTATCTG	-4.06842	-8.82964	stromal_cell
cell_10X_P8_15_AGGCCGTAGCCAGTTT	8.33023	-45.6665	leukocyte
cell_10X_P8_15_AGGCCGTAGTAGATGT	-20.1992	-15.4472	stromal_cell
cell_10X_P8_15_AGGCCGTAGTCGTACT	10.2536	-3.644	stromal_cell
cell_10X_P8_15_AGGCCGTCAGCTGCAC	0.692275	-11.3482	stromal_cell
cell_10X_P8_15_AGGCCGTGTAAAGTCA	-13.1688	-6.12479	stromal_cell
cell_10X_P8_15_AGGCCGTGTCAGCTAT	-3.97838	-10.9479	stromal_cell
cell_10X_P8_15_AGGCCGTGTGCAGTAG	-4.95204	-16.6559	stromal_cell
cell_10X_P8_15_AGGCCGTTCACCGTAA	-32.3295	-14.2928	stromal_cell
cell_10X_P8_15_AGGCCGTTCCCTGACT	13.2282	-37.8687	leukocyte
cell_10X_P8_15_AGGGAGTAGAAGCCCA	-12.1798	-18.747	stromal_cell
cell_10X_P8_15_AGGGAGTAGCTGCGAA	3.14079	-11.8254	stromal_cell
cell_10X_P8_15_AGGGAGTAGGGTCGAT	-2.67809	-2.3138	stromal_cell
cell_10X_P8_15_AGGGAGTAGTGTACGG	-6.66932	-3.29077	stromal_cell
cell_10X_P8_15_AGGGAGTCATCACCCT	0.891043	-4.76376	stromal_cell
cell_10X_P8_15_AGGGAGTGTCCGTTAA	-5.40656	-16.1276	stromal_cell
cell_10X_P8_15_AGGGAGTGTCCTGCTT	45.4074	-15.943	epithelial_cell
cell_10X_P8_15_AGGGAGTGTGGCCCTA	-18.6021	-1.383	stromal_cell
cell_10X_P8_15_AGGGAGTTCACAACGT	-34.8232	-12.0077	stromal_cell
cell_10X_P8_15_AGGGATGAGCGTGTCC	-13.1284	-5.66121	stromal_cell
cell_10X_P8_15_AGGGATGCAAGGTTCT	-1.0943	-1.07539	stromal_cell
cell_10X_P8_15_AGGGATGGTAAGTAGT	-12.4381	-10.7417	stromal_cell
cell_10X_P8_15_AGGGTGAAGACCACGA	47.7757	-16.2117	epithelial_cell
cell_10X_P8_15_AGGGTGACATACTACG	4.76304	-6.14805	stromal_cell
cell_10X_P8_15_AGGGTGAGTCTCAACA	-29.3943	-11.8411	stromal_cell
cell_10X_P8_15_AGGGTGAGTGACAAAT	-11.2363	-13.7607	stromal_cell
cell_10X_P8_15_AGGGTGATCAGCACAT	-17.7114	-19.2562	stromal_cell
cell_10X_P8_15_AGGTCATCAAACGCGA	-0.865605	-13.6306	stromal_cell
cell_10X_P8_15_AGGTCATCAGCTATTG	11.4115	-2.74843	stromal_cell
cell_10X_P8_15_AGGTCATCAGTCCTTC	-32.4353	-1.43788	stromal_cell
cell_10X_P8_15_AGGTCATCATTTCACT	7.41062	-5.87956	stromal_cell
cell_10X_P8_15_AGGTCATGTACCAGTT	4.19114	-8.71855	stromal_cell
cell_10X_P8_15_AGGTCATTCAGATAAG	-17.6604	-18.5392	stromal_cell
cell_10X_P8_15_AGGTCATTCGAGGTAG	-26.4258	-3.26907	stromal_cell
cell_10X_P8_15_AGGTCATTCTGAGGGA	-9.0711	-9.20444	stromal_cell
cell_10X_P8_15_AGGTCATTCTTTAGTC	-30.6351	-16.48	stromal_cell
cell_10X_P8_15_AGGTCCGAGAACAACT	-31.5943	-19.4973	stromal_cell
cell_10X_P8_15_AGGTCCGCACGACTCG	-12.9733	-6.9319	stromal_cell
cell_10X_P8_15_AGGTCCGCACGTGAGA	22.4764	5.28384	endothelial_cell
cell_10X_P8_15_AGGTCCGCAGATCTGT	-29.0525	-17.3139	stromal_cell
cell_10X_P8_15_AGGTCCGCATGCCCGA	54.5979	-19.073	epithelial_cell
cell_10X_P8_15_AGGTCCGGTCCCTTGT	-27.1988	-19.4202	stromal_cell
cell_10X_P8_15_AGGTCCGGTCTAGCCG	-6.8199	-3.22968	stromal_cell
cell_10X_P8_15_AGGTCCGTCCGTCAAA	-7.69414	-13.3051	stromal_cell
cell_10X_P8_15_AGGTCCGTCGCATGGC	-0.241834	-48.8838	endothelial_cell
cell_10X_P8_15_AGGTCCGTCGCCTGAG	-9.9065	-3.76554	stromal_cell
cell_10X_P8_15_AGGTCCGTCTTGACGA	3.78706	-7.36012	stromal_cell
cell_10X_P8_15_AGTAGTCAGAAACGAG	10.8561	-8.8009	stromal_cell
cell_10X_P8_15_AGTAGTCAGAATAGGG	-38.595	-14.8674	stromal_cell
cell_10X_P8_15_AGTAGTCCACCTCGGA	8.7954	0.665076	stromal_cell
cell_10X_P8_15_AGTAGTCCAGTACACT	1.16951	-12.4868	stromal_cell
cell_10X_P8_15_AGTAGTCCATCCCACT	-0.586628	-0.249802	stromal_cell
cell_10X_P8_15_AGTAGTCCATTTCACT	-35.4214	-10.235	stromal_cell
cell_10X_P8_15_AGTAGTCTCCAGATCA	-3.02439	-1.35312	stromal_cell
cell_10X_P8_15_AGTCTTTAGTTCCACA	1.85459	-1.9535	stromal_cell
cell_10X_P8_15_AGTCTTTAGTTGAGTA	-5.70088	-2.45106	stromal_cell
cell_10X_P8_15_AGTCTTTCACTTCTGC	-7.65973	-3.35199	stromal_cell
cell_10X_P8_15_AGTCTTTCAGGTGGAT	3.70533	-9.90763	stromal_cell
cell_10X_P8_15_AGTCTTTCATCACGTA	-1.55873	-18.7335	stromal_cell
cell_10X_P8_15_AGTCTTTGTGAGTATA	-11.9351	-10.1534	stromal_cell
cell_10X_P8_15_AGTCTTTGTTATCACG	3.52773	-6.67078	stromal_cell
cell_10X_P8_15_AGTCTTTGTTGGAGGT	-2.00416	-16.3621	stromal_cell
cell_10X_P8_15_AGTCTTTGTTTGGGCC	2.23828	0.175407	stromal_cell
cell_10X_P8_15_AGTCTTTTCATCGCTC	5.93329	0.519482	stromal_cell
cell_10X_P8_15_AGTCTTTTCCAGTAGT	9.35828	-8.08616	stromal_cell
cell_10X_P8_15_AGTCTTTTCGCGTAGC	-7.10011	-3.31777	stromal_cell
cell_10X_P8_15_AGTGAGGAGTACGTAA	-9.62594	-3.66996	stromal_cell
cell_10X_P8_15_AGTGAGGAGTAGCGGT	1.6124	-11.0649	stromal_cell
cell_10X_P8_15_AGTGAGGCAGACAAAT	22.3109	-4.17982	endothelial_cell
cell_10X_P8_15_AGTGAGGCAGCCTGTG	-9.39677	-19.2915	stromal_cell
cell_10X_P8_15_AGTGAGGCATCGACGC	-4.70635	-15.09	stromal_cell
cell_10X_P8_15_AGTGAGGCATCGGGTC	9.24568	-2.16284	stromal_cell
cell_10X_P8_15_AGTGAGGCATGGGACA	2.07459	-1.28982	stromal_cell
cell_10X_P8_15_AGTGAGGCATGTCCTC	-35.1701	-5.69311	stromal_cell
cell_10X_P8_15_AGTGAGGGTAGGCATG	-9.72927	-21.3394	stromal_cell
cell_10X_P8_15_AGTGAGGGTCGCGTGT	-20.4258	-8.95964	stromal_cell
cell_10X_P8_15_AGTGAGGGTCTAAAGA	6.28631	-1.81246	stromal_cell
cell_10X_P8_15_AGTGAGGGTCTAGGTT	-24.2296	-15.8668	stromal_cell
cell_10X_P8_15_AGTGAGGGTGTTGGGA	9.58432	-2.41581	stromal_cell
cell_10X_P8_15_AGTGAGGGTTATCACG	13.0219	-37.7733	leukocyte
cell_10X_P8_15_AGTGAGGGTTCGGGCT	-16.2906	-10.1222	stromal_cell
cell_10X_P8_15_AGTGAGGTCCTTGGTC	10.4797	-2.11889	stromal_cell
cell_10X_P8_15_AGTGAGGTCTTCAACT	-9.14373	-12.2787	stromal_cell
cell_10X_P8_15_AGTGGGAAGATATGGT	-18.3558	-14.769	stromal_cell
cell_10X_P8_15_AGTGGGAAGCTCCCAG	4.52404	-7.07656	stromal_cell
cell_10X_P8_15_AGTGGGAAGGACACCA	-12.8377	-4.90851	stromal_cell
cell_10X_P8_15_AGTGGGAAGGTGCTTT	-20.5665	-3.20172	stromal_cell
cell_10X_P8_15_AGTGGGACACTCAGGC	25.1522	-5.04573	endothelial_cell
cell_10X_P8_15_AGTGGGAGTAGCGTGA	-30.4035	-7.33781	stromal_cell
cell_10X_P8_15_AGTGGGATCCAGTAGT	-2.094	-6.89298	stromal_cell
cell_10X_P8_15_AGTGGGATCCATGAGT	9.21019	0.342191	stromal_cell
cell_10X_P8_15_AGTGTCAAGGCTAGCA	-31.4668	-18.3493	stromal_cell
cell_10X_P8_15_AGTGTCAGTAGAGGAA	5.94959	-8.25329	stromal_cell
cell_10X_P8_15_AGTGTCAGTGGCAAAC	40.9682	-16.3445	epithelial_cell
cell_10X_P8_15_AGTGTCATCGCGCCAA	-2.42764	-12.6074	stromal_cell
cell_10X_P8_15_AGTGTCATCTGTCAAG	-4.93169	-10.158	stromal_cell
cell_10X_P8_15_AGTTGGTAGCCATCGC	20.1886	-3.4237	endothelial_cell
cell_10X_P8_15_AGTTGGTAGTAACCCT	5.8782	-4.35886	stromal_cell
cell_10X_P8_15_AGTTGGTAGTAGCGGT	-25.475	-1.95685	stromal_cell
cell_10X_P8_15_AGTTGGTCAAGCTGAG	-18.4638	-19.7171	stromal_cell
cell_10X_P8_15_AGTTGGTCAAGTAGTA	9.90144	-3.35017	stromal_cell
cell_10X_P8_15_AGTTGGTCACAACTGT	-14.1661	-6.66612	stromal_cell
cell_10X_P8_15_AGTTGGTCACACATGT	-8.41855	-17.6928	stromal_cell
cell_10X_P8_15_AGTTGGTCAGGAATCG	0.457666	-43.8801	neuroendocrine_cell
cell_10X_P8_15_AGTTGGTCATCGGAAG	-24.6397	-17.0673	stromal_cell
cell_10X_P8_15_AGTTGGTGTCCTCTTG	-20.079	-2.55785	stromal_cell
cell_10X_P8_15_AGTTGGTGTGTTCGAT	-5.45315	-1.04766	stromal_cell
cell_10X_P8_15_AGTTGGTGTGTTCTTT	10.4257	-5.35408	stromal_cell
cell_10X_P8_15_AGTTGGTGTTCTGGTA	19.7187	3.76051	endothelial_cell
cell_10X_P8_15_AGTTGGTTCATCGCTC	4.52031	0.0910131	stromal_cell
cell_10X_P8_15_ATAACGCAGCTGGAAC	-35.4117	-11.2183	stromal_cell
cell_10X_P8_15_ATAACGCAGGATCGCA	9.4558	-37.8305	leukocyte
cell_10X_P8_15_ATAACGCCACATGTGT	2.11057	-3.3189	stromal_cell
cell_10X_P8_15_ATAACGCGTAGCGTAG	-27.1062	-5.5874	stromal_cell
cell_10X_P8_15_ATAACGCGTAGCTCCG	-32.9962	-4.21977	stromal_cell
cell_10X_P8_15_ATAACGCGTATGAATG	-19.7965	-11.5106	stromal_cell
cell_10X_P8_15_ATAACGCTCGAGAACG	-9.4111	-11.8699	stromal_cell
cell_10X_P8_15_ATAACGCTCGGAGCAA	11.3716	-3.01409	stromal_cell
cell_10X_P8_15_ATAACGCTCTACGAGT	5.24805	-5.91911	stromal_cell
cell_10X_P8_15_ATAAGAGAGCCGCCTA	8.75122	-45.9604	leukocyte
cell_10X_P8_15_ATAAGAGCACATGACT	-10.3613	-0.537141	stromal_cell
cell_10X_P8_15_ATAAGAGCACTACAGT	-33.4567	-5.74977	stromal_cell
cell_10X_P8_15_ATAAGAGCAGTGGAGT	-14.7359	-23.0189	stromal_cell
cell_10X_P8_15_ATAAGAGCATCCTAGA	-14.3623	-11.0779	stromal_cell
cell_10X_P8_15_ATAAGAGGTCCGAGTC	-4.4779	-2.33269	stromal_cell
cell_10X_P8_15_ATAAGAGGTCTAAAGA	-36.5007	-16.724	stromal_cell
cell_10X_P8_15_ATAAGAGGTTATCCGA	47.9588	-17.7969	epithelial_cell
cell_10X_P8_15_ATAAGAGTCTAAGCCA	-32.3847	-1.63915	stromal_cell
cell_10X_P8_15_ATAAGAGTCTCTAGGA	-1.8107	-14.4108	stromal_cell
cell_10X_P8_15_ATAGACCAGACAGACC	10.7773	8.01351	neuroendocrine_cell
cell_10X_P8_15_ATAGACCAGCATGGCA	-35.4908	-18.7496	stromal_cell
cell_10X_P8_15_ATAGACCAGCTAACTC	4.23716	-8.39889	stromal_cell
cell_10X_P8_15_ATAGACCAGTTGCAGG	-33.0325	-8.34995	stromal_cell
cell_10X_P8_15_ATAGACCGTCCAAGTT	40.9931	-16.0743	epithelial_cell
cell_10X_P8_15_ATAGACCTCGGTCCGA	-8.44498	-7.3401	stromal_cell
cell_10X_P8_15_ATAGACCTCTGATTCT	-24.3239	-13.1963	stromal_cell
cell_10X_P8_15_ATCACGAAGGCTAGAC	-33.566	-8.59355	stromal_cell
cell_10X_P8_15_ATCACGACAAGGCTCC	-29.6342	-12.1279	stromal_cell
cell_10X_P8_15_ATCACGACATAGGATA	-5.71727	-17.8597	stromal_cell
cell_10X_P8_15_ATCACGAGTACGCTGC	13.6261	-36.6179	leukocyte
cell_10X_P8_15_ATCACGAGTATATCCG	1.55559	0.360581	stromal_cell
cell_10X_P8_15_ATCACGATCGAATGCT	-4.0964	-12.7794	stromal_cell
cell_10X_P8_15_ATCATCTAGTTCGCAT	-12.2653	-18.5298	stromal_cell
cell_10X_P8_15_ATCATCTGTAAGGATT	-9.27587	-15.7364	stromal_cell
cell_10X_P8_15_ATCATCTGTACTTCTT	-20.5667	-3.8275	stromal_cell
cell_10X_P8_15_ATCATCTTCACAAACC	-32.1275	-1.53821	stromal_cell
cell_10X_P8_15_ATCATCTTCACGAAGG	6.28268	-3.14349	stromal_cell
cell_10X_P8_15_ATCATCTTCCTCTAGC	-10.2445	-18.5877	stromal_cell
cell_10X_P8_15_ATCATGGAGAATAGGG	19.9805	-3.45052	stromal_cell
cell_10X_P8_15_ATCATGGAGTTCGATC	-23.4944	-7.75921	stromal_cell
cell_10X_P8_15_ATCATGGAGTTTCCTT	-25.6813	-6.92888	stromal_cell
cell_10X_P8_15_ATCATGGCAAGGTGTG	7.87431	8.32521	neuroendocrine_cell
cell_10X_P8_15_ATCATGGCATTGGCGC	-32.5963	-9.14285	stromal_cell
cell_10X_P8_15_ATCATGGGTAACGCGA	-30.8553	-7.30299	stromal_cell
cell_10X_P8_15_ATCATGGGTACCGGCT	21.6186	-3.89971	endothelial_cell
cell_10X_P8_15_ATCATGGGTCCGAAGA	-37.2989	-18.3572	stromal_cell
cell_10X_P8_15_ATCATGGGTGGTCCGT	4.20826	-11.6494	stromal_cell
cell_10X_P8_15_ATCATGGGTTCGCGAC	11.3006	-45.196	leukocyte
cell_10X_P8_15_ATCATGGGTTCGGGCT	-2.42832	-6.29319	stromal_cell
cell_10X_P8_15_ATCATGGTCAAAGACA	-34.53	-9.36557	stromal_cell
cell_10X_P8_15_ATCATGGTCGCGTAGC	9.70001	-3.25442	stromal_cell
cell_10X_P8_15_ATCATGGTCTGCTGTC	2.13306	-8.02168	stromal_cell
cell_10X_P8_15_ATCCACCAGATGCGAC	6.1615	-3.02439	stromal_cell
cell_10X_P8_15_ATCCACCAGCCAGGAT	-35.4002	-7.21424	stromal_cell
cell_10X_P8_15_ATCCACCAGGATGTAT	3.77748	-1.94243	stromal_cell
cell_10X_P8_15_ATCCACCAGGGCTCTC	-0.317183	-17.5507	stromal_cell
cell_10X_P8_15_ATCCACCCAATCGGTT	-32.8998	-18.7856	stromal_cell
cell_10X_P8_15_ATCCACCCAGAAGCAC	3.65677	-3.50089	stromal_cell
cell_10X_P8_15_ATCCACCGTCAGCTAT	-5.19828	-14.7808	stromal_cell
cell_10X_P8_15_ATCCACCGTCTCCACT	47.97	-17.0164	epithelial_cell
cell_10X_P8_15_ATCCACCGTTCCACGG	-32.7512	-1.75892	stromal_cell
cell_10X_P8_15_ATCCACCTCACGAAGG	9.65746	-0.271845	stromal_cell
cell_10X_P8_15_ATCCACCTCCGCATCT	-24.8809	-4.14676	stromal_cell
cell_10X_P8_15_ATCCGAAAGAATTCCC	-15.0965	-9.68273	stromal_cell
cell_10X_P8_15_ATCCGAAAGATCGGGT	7.57697	-8.41658	stromal_cell
cell_10X_P8_15_ATCCGAAAGGGATGGG	-10.1725	-13.8779	stromal_cell
cell_10X_P8_15_ATCCGAACAATACGCT	-14.396	-15.6739	stromal_cell
cell_10X_P8_15_ATCCGAACAGTCCTTC	-1.00759	-16.4408	stromal_cell
cell_10X_P8_15_ATCCGAACATAGAAAC	-6.64841	-15.4993	stromal_cell
cell_10X_P8_15_ATCCGAACATCCCACT	6.16461	-1.92428	stromal_cell
cell_10X_P8_15_ATCCGAAGTTCCCTTG	-32.9054	-2.36844	stromal_cell
cell_10X_P8_15_ATCGAGTAGCCACGCT	-9.01694	-11.4038	stromal_cell
cell_10X_P8_15_ATCGAGTAGCTTCGCG	2.17376	1.92426	stromal_cell
cell_10X_P8_15_ATCGAGTAGGAATTAC	-15.7416	-5.0886	stromal_cell
cell_10X_P8_15_ATCGAGTAGTTAAGTG	-10.2731	-2.24687	stromal_cell
cell_10X_P8_15_ATCGAGTCAAAGTCAA	-15.3393	-15.2596	stromal_cell
cell_10X_P8_15_ATCGAGTCACGGTAAG	-2.43442	-7.34213	stromal_cell
cell_10X_P8_15_ATCGAGTGTTCTGAAC	-30.7933	-11.3826	stromal_cell
cell_10X_P8_15_ATCGAGTTCCGGCACA	6.99232	9.64295	neuroendocrine_cell
cell_10X_P8_15_ATCTACTAGCTCCCAG	4.26454	-5.47386	stromal_cell
cell_10X_P8_15_ATCTACTAGTCACGCC	3.58896	-12.8157	stromal_cell
cell_10X_P8_15_ATCTACTCAAGGTTCT	-3.50981	-0.53171	stromal_cell
cell_10X_P8_15_ATCTACTCACCAGATT	1.7219	0.424031	stromal_cell
cell_10X_P8_15_ATCTACTCAGATTGCT	9.01027	-3.95368	stromal_cell
cell_10X_P8_15_ATCTACTCAGGCGATA	-12.9063	-13.8607	stromal_cell
cell_10X_P8_15_ATCTACTCAGGTGCCT	-5.86508	-15.1374	stromal_cell
cell_10X_P8_15_ATCTACTCATATACGC	-15.7598	-6.22861	stromal_cell
cell_10X_P8_15_ATCTACTCATGCGCAC	-7.06016	-6.8772	stromal_cell
cell_10X_P8_15_ATCTACTGTAGGGTAC	-2.2477	-6.15024	stromal_cell
cell_10X_P8_15_ATCTACTGTTACGCGC	-21.6807	-19.9166	stromal_cell
cell_10X_P8_15_ATCTACTGTTCCACTC	20.951	1.59102	endothelial_cell
cell_10X_P8_15_ATCTACTTCAGTTGAC	-14.0722	-9.28937	stromal_cell
cell_10X_P8_15_ATCTACTTCGCCTGAG	-5.86279	-23.261	stromal_cell
cell_10X_P8_15_ATCTGCCAGCTTCGCG	8.38029	-9.42911	stromal_cell
cell_10X_P8_15_ATCTGCCAGTACTTGC	-1.65419	-8.99182	stromal_cell
cell_10X_P8_15_ATCTGCCCATACTCTT	-2.21468	-12.5642	stromal_cell
cell_10X_P8_15_ATCTGCCGTGAGTATA	-8.94501	-6.64299	stromal_cell
cell_10X_P8_15_ATCTGCCGTTCCAACA	-6.54275	-2.9003	stromal_cell
cell_10X_P8_15_ATCTGCCTCACATACG	-11.2061	-10.3261	stromal_cell
cell_10X_P8_15_ATCTGCCTCACATGCA	-36.658	-11.7459	stromal_cell
cell_10X_P8_15_ATCTGCCTCAGGCGAA	-27.6254	-19.5636	stromal_cell
cell_10X_P8_15_ATCTGCCTCCTTGACC	-12.5949	-13.4739	stromal_cell
cell_10X_P8_15_ATCTGCCTCTATCCTA	-2.74479	-1.44076	stromal_cell
cell_10X_P8_15_ATCTGCCTCTCATTCA	-17.0753	-10.9098	stromal_cell
cell_10X_P8_15_ATGAGGGAGGACAGCT	-31.4458	-10.2906	stromal_cell
cell_10X_P8_15_ATGAGGGAGTGCGTGA	-25.713	-3.98362	stromal_cell
cell_10X_P8_15_ATGAGGGCAATAAGCA	3.86348	-4.94093	stromal_cell
cell_10X_P8_15_ATGAGGGCATTCCTCG	7.56712	-45.0325	leukocyte
cell_10X_P8_15_ATGAGGGCATTTGCCC	-22.7607	-11.3137	stromal_cell
cell_10X_P8_15_ATGAGGGGTCGGCATC	-6.08261	-16.5423	stromal_cell
cell_10X_P8_15_ATGAGGGTCAACTCTT	-5.77947	-8.48962	stromal_cell
cell_10X_P8_15_ATGAGGGTCACAGGCC	11.6871	-3.28066	stromal_cell
cell_10X_P8_15_ATGAGGGTCATCATTC	1.96338	-1.28493	stromal_cell
cell_10X_P8_15_ATGAGGGTCTCTAAGG	4.57581	-5.66584	stromal_cell
cell_10X_P8_15_ATGAGGGTCTGAGGGA	-11.2696	-18.2269	stromal_cell
cell_10X_P8_15_ATGCGATAGAGGTAGA	-38.6073	-10.385	stromal_cell
cell_10X_P8_15_ATGCGATAGTATCGAA	45.9314	-16.7438	epithelial_cell
cell_10X_P8_15_ATGCGATGTATGCTTG	24.8316	9.58244	endothelial_cell
cell_10X_P8_15_ATGCGATGTCTCCACT	21.4325	2.57482	endothelial_cell
cell_10X_P8_15_ATGCGATGTTGAGGTG	10.4707	-6.42258	stromal_cell
cell_10X_P8_15_ATGCGATTCAATACCG	9.81824	-48.5516	leukocyte
cell_10X_P8_15_ATGCGATTCCCAAGAT	49.2075	-17.3363	epithelial_cell
cell_10X_P8_15_ATGGGAGCAATCAGAA	-2.77904	-1.91528	stromal_cell
cell_10X_P8_15_ATGGGAGCACCCTATC	-34.0972	-11.4643	stromal_cell
cell_10X_P8_15_ATGGGAGGTCTTGTCC	5.6528	-6.63902	stromal_cell
cell_10X_P8_15_ATGGGAGGTGAAAGAG	-28.5062	-13.3032	stromal_cell
cell_10X_P8_15_ATGGGAGGTGCGAAAC	4.51278	-5.67562	stromal_cell
cell_10X_P8_15_ATGGGAGGTTGCCTCT	-34.4513	-7.06832	stromal_cell
cell_10X_P8_15_ATGGGAGGTTTGACTG	5.39089	-8.32817	stromal_cell
cell_10X_P8_15_ATGTGTGAGGCGCTCT	-9.27157	-12.976	stromal_cell
cell_10X_P8_15_ATGTGTGCACTTCGAA	9.38258	-7.82074	stromal_cell
cell_10X_P8_15_ATGTGTGGTACAGCAG	-18.0879	-13.2874	stromal_cell
cell_10X_P8_15_ATGTGTGGTCCGAACC	-5.83581	-15.063	stromal_cell
cell_10X_P8_15_ATGTGTGGTTCTCATT	-35.7407	-8.68989	stromal_cell
cell_10X_P8_15_ATGTGTGGTTTCCACC	-7.01417	-15.9592	stromal_cell
cell_10X_P8_15_ATGTGTGTCCAACCAA	-11.1913	-11.9621	stromal_cell
cell_10X_P8_15_ATGTGTGTCCGTTGCT	-33.3533	-16.0516	stromal_cell
cell_10X_P8_15_ATTACTCAGACCTTTG	11.4133	-3.00447	stromal_cell
cell_10X_P8_15_ATTACTCAGCCCAACC	-2.97102	1.45529	stromal_cell
cell_10X_P8_15_ATTACTCAGGGCTTCC	-8.82142	-18.0309	stromal_cell
cell_10X_P8_15_ATTACTCCAAAGTCAA	-21.7517	-9.24218	stromal_cell
cell_10X_P8_15_ATTACTCCACAGGCCT	-34.6644	-15.1995	stromal_cell
cell_10X_P8_15_ATTACTCCACGAAAGC	8.67336	-47.6127	leukocyte
cell_10X_P8_15_ATTACTCCACTTAAGC	-37.2379	-7.13183	stromal_cell
cell_10X_P8_15_ATTACTCGTCTCTTAT	4.11799	-1.63483	stromal_cell
cell_10X_P8_15_ATTACTCTCTCGCATC	24.3605	9.56863	endothelial_cell
cell_10X_P8_15_ATTACTCTCTGGTATG	3.62984	-0.560912	stromal_cell
cell_10X_P8_15_ATTATCCAGAGACGAA	3.00143	-7.19519	stromal_cell
cell_10X_P8_15_ATTATCCAGTTCGCGC	-13.1233	1.33203	neuroendocrine_cell
cell_10X_P8_15_ATTATCCCACTGAAGG	4.54556	-8.36799	stromal_cell
cell_10X_P8_15_ATTATCCGTAACGTTC	20.6718	-2.00368	endothelial_cell
cell_10X_P8_15_ATTATCCGTGCAACGA	-29.5159	-9.00136	stromal_cell
cell_10X_P8_15_ATTATCCGTGCGATAG	-11.7828	-19.8759	stromal_cell
cell_10X_P8_15_ATTATCCGTTTACTCT	2.25289	-7.63123	stromal_cell
cell_10X_P8_15_ATTATCCTCATTTGGG	-4.86628	-20.5939	stromal_cell
cell_10X_P8_15_ATTATCCTCCCTAACC	9.00531	0.497272	stromal_cell
cell_10X_P8_15_ATTATCCTCGGAAATA	-34.7466	-11.3344	stromal_cell
cell_10X_P8_15_ATTATCCTCGTCCAGG	-6.00207	-23.0954	stromal_cell
cell_10X_P8_15_ATTCTACAGACGCACA	-30.482	-11.6903	stromal_cell
cell_10X_P8_15_ATTCTACAGAGGGCTT	-3.62359	-10.556	stromal_cell
cell_10X_P8_15_ATTCTACAGCAATCTC	-3.14233	-1.54593	stromal_cell
cell_10X_P8_15_ATTCTACAGGACAGAA	8.08232	-4.4451	stromal_cell
cell_10X_P8_15_ATTCTACCACAGTCGC	-17.4047	-20.8885	stromal_cell
cell_10X_P8_15_ATTCTACGTAAGGGCT	-4.02015	-1.54025	stromal_cell
cell_10X_P8_15_ATTCTACGTCCATCCT	-37.402	-17.9989	stromal_cell
cell_10X_P8_15_ATTCTACGTGTGACCC	2.13759	-7.02268	stromal_cell
cell_10X_P8_15_ATTCTACGTTGTGGCC	50.6077	-18.0849	epithelial_cell
cell_10X_P8_15_ATTCTACTCCAAATGC	-15.6944	-7.1593	stromal_cell
cell_10X_P8_15_ATTCTACTCCAGATCA	-27.567	-19.5951	stromal_cell
cell_10X_P8_15_ATTCTACTCGCCATAA	0.267707	-14.4507	stromal_cell
cell_10X_P8_15_ATTGGACAGGTTCCTA	20.3923	-3.36993	endothelial_cell
cell_10X_P8_15_ATTGGACCAAGCGAGT	-27.126	-5.65167	stromal_cell
cell_10X_P8_15_ATTGGACCAGGAATGC	10.7066	-4.92031	stromal_cell
cell_10X_P8_15_ATTGGACGTAAATGAC	49.2359	-18.9736	epithelial_cell
cell_10X_P8_15_ATTGGACGTGACTACT	-13.7805	-9.6948	stromal_cell
cell_10X_P8_15_ATTGGACGTGATAAGT	-33.7303	-12.314	stromal_cell
cell_10X_P8_15_ATTGGACTCAGAAATG	-22.1196	-7.65594	stromal_cell
cell_10X_P8_15_ATTGGACTCAGTACGT	10.3316	-48.591	leukocyte
cell_10X_P8_15_ATTGGACTCAGTTGAC	-12.1889	-20.1068	stromal_cell
cell_10X_P8_15_ATTGGACTCCATTCTA	-2.44144	-14.0444	stromal_cell
cell_10X_P8_15_ATTGGACTCCGCTGTT	-33.3056	-15.5893	stromal_cell
cell_10X_P8_15_ATTGGACTCTTGCAAG	-0.460293	-7.82509	stromal_cell
cell_10X_P8_15_ATTGGTGAGAGGTTGC	-33.4363	-4.77722	stromal_cell
cell_10X_P8_15_ATTGGTGAGGATGGTC	4.01024	-11.7518	stromal_cell
cell_10X_P8_15_ATTGGTGAGGGCATGT	24.8826	-4.52517	endothelial_cell
cell_10X_P8_15_ATTGGTGAGGTGTGGT	-19.4551	-10.476	stromal_cell
cell_10X_P8_15_ATTGGTGAGTACGCGA	10.1154	-5.34048	stromal_cell
cell_10X_P8_15_ATTGGTGAGTTCGCAT	-21.6854	-7.82132	stromal_cell
cell_10X_P8_15_ATTGGTGCATATACGC	-3.27806	-5.27692	stromal_cell
cell_10X_P8_15_ATTGGTGCATCGATGT	-10.4864	-14.0396	stromal_cell
cell_10X_P8_15_ATTGGTGGTAACGCGA	-34.2838	-10.3101	stromal_cell
cell_10X_P8_15_ATTGGTGTCGCAAGCC	9.23322	-0.284616	stromal_cell
cell_10X_P8_15_ATTTCTGAGGACGAAA	-35.3535	-4.79297	stromal_cell
cell_10X_P8_15_ATTTCTGAGGAGCGTT	-17.9502	-20.5694	stromal_cell
cell_10X_P8_15_ATTTCTGAGGCATGTG	8.81692	0.63656	stromal_cell
cell_10X_P8_15_ATTTCTGCAAGCGATG	5.31988	-10.7858	stromal_cell
cell_10X_P8_15_ATTTCTGCACCAACCG	-4.09731	-7.50145	stromal_cell
cell_10X_P8_15_ATTTCTGCACGGTAAG	-0.0223435	-17.9006	stromal_cell
cell_10X_P8_15_ATTTCTGCATCCAACA	-22.0081	-19.9851	stromal_cell
cell_10X_P8_15_ATTTCTGCATGGATGG	4.13694	-7.05368	stromal_cell
cell_10X_P8_15_ATTTCTGTCAGGTTCA	-16.4236	-19.8344	stromal_cell
cell_10X_P8_15_ATTTCTGTCCCAACGG	2.82118	-11.6056	stromal_cell
cell_10X_P8_15_ATTTCTGTCCCAAGAT	-5.85464	-11.8828	stromal_cell
cell_10X_P8_15_ATTTCTGTCCCTAATT	-5.94898	-22.8939	stromal_cell
cell_10X_P8_15_ATTTCTGTCTTGGGTA	-32.7358	-4.6134	stromal_cell
cell_10X_P8_15_CAACCAAAGAAGGACA	6.53397	-50.2096	leukocyte
cell_10X_P8_15_CAACCAAAGGCCGAAT	-0.801904	-9.62095	stromal_cell
cell_10X_P8_15_CAACCAACACATCTTT	-32.6414	-0.815297	stromal_cell
cell_10X_P8_15_CAACCAACAGGACCCT	-4.17971	-6.38094	stromal_cell
cell_10X_P8_15_CAACCAACAGGATTGG	-13.1182	-11.2727	stromal_cell
cell_10X_P8_15_CAACCAAGTAGAAAGG	-26.4004	-4.53847	stromal_cell
cell_10X_P8_15_CAACCAAGTAGCGCTC	-11.9459	-12.4783	stromal_cell
cell_10X_P8_15_CAACCAAGTAGCGTAG	-16.0504	-14.0925	stromal_cell
cell_10X_P8_15_CAACCAAGTCCAGTGC	-4.88035	-12.8348	stromal_cell
cell_10X_P8_15_CAACCAAGTCCTGCTT	-16.6681	-19.932	stromal_cell
cell_10X_P8_15_CAACCAAGTGATGTCT	-4.53846	-5.54104	stromal_cell
cell_10X_P8_15_CAACCAATCACCTTAT	47.7817	-17.4985	epithelial_cell
cell_10X_P8_15_CAACCTCAGACGCACA	8.86892	-2.70169	stromal_cell
cell_10X_P8_15_CAACCTCAGGGTCTCC	-10.6537	-18.2376	stromal_cell
cell_10X_P8_15_CAACCTCAGTGGAGTC	-26.8999	-6.55443	stromal_cell
cell_10X_P8_15_CAACCTCAGTTACGGG	-9.50008	-11.5739	stromal_cell
cell_10X_P8_15_CAACCTCCAAACCTAC	12.0236	-44.8505	leukocyte
cell_10X_P8_15_CAACCTCCACGACTCG	10.5166	-3.50995	stromal_cell
cell_10X_P8_15_CAACCTCCATGCCTAA	23.346	5.67939	endothelial_cell
cell_10X_P8_15_CAACCTCCATGGTTGT	-9.81764	-0.905367	stromal_cell
cell_10X_P8_15_CAACCTCGTACGAAAT	-35.122	-7.11965	stromal_cell
cell_10X_P8_15_CAACCTCGTCAACATC	-5.71707	-7.13223	stromal_cell
cell_10X_P8_15_CAACCTCGTCACTGGC	-14.6484	-14.9513	stromal_cell
cell_10X_P8_15_CAACCTCTCGCATGAT	-31.4673	-9.65006	stromal_cell
cell_10X_P8_15_CAACCTCTCTACTTAC	-30.113	-7.78378	stromal_cell
cell_10X_P8_15_CAACTAGAGTTTCCTT	21.4558	3.51746	endothelial_cell
cell_10X_P8_15_CAACTAGCAATGAATG	-6.06907	-10.6638	stromal_cell
cell_10X_P8_15_CAACTAGGTTGAACTC	-2.72818	-13.3061	stromal_cell
cell_10X_P8_15_CAAGAAAAGAAGGACA	42.5604	-14.5376	epithelial_cell
cell_10X_P8_15_CAAGAAACAAGTAGTA	-0.215059	0.342826	stromal_cell
cell_10X_P8_15_CAAGAAACACGGTGTC	10.0755	-2.31524	stromal_cell
cell_10X_P8_15_CAAGAAACATAGTAAG	-30.9013	-17.5841	stromal_cell
cell_10X_P8_15_CAAGAAAGTAACGCGA	-23.6189	-6.80942	stromal_cell
cell_10X_P8_15_CAAGAAATCCTGTAGA	11.3722	-4.43598	stromal_cell
cell_10X_P8_15_CAAGATCAGAGAACAG	-8.58624	-14.6974	stromal_cell
cell_10X_P8_15_CAAGATCAGCGATATA	24.7674	-5.90634	endothelial_cell
cell_10X_P8_15_CAAGATCAGCTAAACA	2.37689	-7.36668	stromal_cell
cell_10X_P8_15_CAAGATCAGTGTGGCA	10.9509	7.27719	neuroendocrine_cell
cell_10X_P8_15_CAAGATCCAAAGAATC	10.64	-1.14732	stromal_cell
cell_10X_P8_15_CAAGATCCAACTGGCC	4.07526	2.057	stromal_cell
cell_10X_P8_15_CAAGATCCAAGACGTG	4.01649	-8.9091	stromal_cell
cell_10X_P8_15_CAAGATCCAATCCAAC	-31.1109	-19.9939	stromal_cell
cell_10X_P8_15_CAAGATCCAATTCCTT	54.3957	-19.8107	epithelial_cell
cell_10X_P8_15_CAAGATCCAGACAAAT	-23.5587	-3.72101	stromal_cell
cell_10X_P8_15_CAAGATCGTACAAGTA	5.77143	-6.83551	stromal_cell
cell_10X_P8_15_CAAGATCGTCGAATCT	-16.2093	-19.3002	stromal_cell
cell_10X_P8_15_CAAGATCGTCTTGCGG	-1.29115	-4.48699	stromal_cell
cell_10X_P8_15_CAAGATCGTTACCGAT	21.5724	-3.92341	endothelial_cell
cell_10X_P8_15_CAAGATCTCGTGGACC	6.75782	-2.39893	stromal_cell
cell_10X_P8_15_CAAGATCTCTTAACCT	-3.72298	-3.46447	stromal_cell
cell_10X_P8_15_CAAGGCCAGATAGGAG	11.7801	-40.962	leukocyte
cell_10X_P8_15_CAAGGCCAGCCACGTC	3.75821	-3.11791	stromal_cell
cell_10X_P8_15_CAAGGCCCAAGTTGTC	4.62533	-3.98966	stromal_cell
cell_10X_P8_15_CAAGGCCCAGCGTCCA	21.7852	4.19283	endothelial_cell
cell_10X_P8_15_CAAGGCCCATCCAACA	-26.0057	-3.0812	stromal_cell
cell_10X_P8_15_CAAGGCCGTAGAAGGA	-33.0171	-12.4224	stromal_cell
cell_10X_P8_15_CAAGGCCGTCCAACTA	10.9124	-5.07062	stromal_cell
cell_10X_P8_15_CAAGGCCGTCCCTACT	-0.176056	-17.0571	stromal_cell
cell_10X_P8_15_CAAGGCCGTTCTGAAC	4.56104	-3.60255	stromal_cell
cell_10X_P8_15_CAAGGCCTCACAACGT	-32.0153	-6.48541	stromal_cell
cell_10X_P8_15_CAAGGCCTCTTAGAGC	-18.6757	-1.43837	stromal_cell
cell_10X_P8_15_CAAGTTGAGAAACCGC	-21.6844	-2.47414	stromal_cell
cell_10X_P8_15_CAAGTTGAGAAGGTGA	-31.1529	-3.40576	stromal_cell
cell_10X_P8_15_CAAGTTGAGACAATAC	42.3738	-14.2231	epithelial_cell
cell_10X_P8_15_CAAGTTGAGATAGTCA	-4.92501	-13.0204	stromal_cell
cell_10X_P8_15_CAAGTTGAGCCAGGAT	-35.2977	-4.62581	stromal_cell
cell_10X_P8_15_CAAGTTGAGGTTCCTA	-25.8715	-3.16641	stromal_cell
cell_10X_P8_15_CAAGTTGAGTAGGTGC	-8.31722	-0.0556387	stromal_cell
cell_10X_P8_15_CAAGTTGAGTTACGGG	9.15161	-45.2244	leukocyte
cell_10X_P8_15_CAAGTTGCACCGTTGG	-12.2433	-15.3984	stromal_cell
cell_10X_P8_15_CAAGTTGGTCAACATC	-37.334	-6.97758	stromal_cell
cell_10X_P8_15_CAAGTTGGTTACGGAG	-5.34986	-11.9447	stromal_cell
cell_10X_P8_15_CAAGTTGGTTACGTCA	11.2313	-1.29076	stromal_cell
cell_10X_P8_15_CAAGTTGTCAAACCAC	23.6656	-5.20209	endothelial_cell
cell_10X_P8_15_CAAGTTGTCTGTCTCG	-26.7232	-1.72239	stromal_cell
cell_10X_P8_15_CACAAACAGCACCGTC	1.91414	-10.9252	stromal_cell
cell_10X_P8_15_CACAAACAGCAGGCTA	0.171755	-17.6896	stromal_cell
cell_10X_P8_15_CACAAACCAAGCCCAC	-4.89931	-7.66516	stromal_cell
cell_10X_P8_15_CACAAACCAAGCTGTT	-21.4441	-11.8125	stromal_cell
cell_10X_P8_15_CACAAACGTCTTGATG	-1.51051	-0.614502	stromal_cell
cell_10X_P8_15_CACAAACGTGGACGAT	1.65662	-4.224	stromal_cell
cell_10X_P8_15_CACAAACGTTGATTCG	-15.8031	-5.47978	stromal_cell
cell_10X_P8_15_CACAAACTCTAGAGTC	-10.4121	-1.54351	stromal_cell
cell_10X_P8_15_CACACAAAGATCCCGC	8.29561	-8.74443	stromal_cell
cell_10X_P8_15_CACACAACAATAAGCA	-9.49846	-22.973	stromal_cell
cell_10X_P8_15_CACACAACACCTATCC	1.72506	-1.52473	stromal_cell
cell_10X_P8_15_CACACAACATTACGAC	1.71321	-7.44742	stromal_cell
cell_10X_P8_15_CACACAAGTAAGAGAG	-32.1472	-3.68992	stromal_cell
cell_10X_P8_15_CACACAAGTCAGTGGA	2.02238	-13.6914	stromal_cell
cell_10X_P8_15_CACACAAGTCTTGTCC	-29.3525	-9.59976	stromal_cell
cell_10X_P8_15_CACACAAGTGGTGTAG	-13.3945	-10.6385	stromal_cell
cell_10X_P8_15_CACACAATCACAACGT	-11.726	-6.48618	stromal_cell
cell_10X_P8_15_CACACAATCACCCTCA	-14.6313	-15.0407	stromal_cell
cell_10X_P8_15_CACACAATCCAAACAC	-4.28748	-13.468	stromal_cell
cell_10X_P8_15_CACACAATCGCGTTTC	-12.9585	-14.1657	stromal_cell
cell_10X_P8_15_CACACCTAGAAGGCCT	1.23953	-7.94795	stromal_cell
cell_10X_P8_15_CACACCTAGACCACGA	-29.9813	-8.13539	stromal_cell
cell_10X_P8_15_CACACCTAGGCCCTCA	11.5868	-43.7024	leukocyte
cell_10X_P8_15_CACACCTAGGGTGTGT	22.2299	8.6891	endothelial_cell
cell_10X_P8_15_CACACCTCACAACGCC	8.86112	-9.3491	stromal_cell
cell_10X_P8_15_CACACCTCACAACTGT	-15.5322	-3.56973	stromal_cell
cell_10X_P8_15_CACACCTGTTAAGTAG	1.99937	2.03756	stromal_cell
cell_10X_P8_15_CACACCTTCTGCGGCA	10.9044	-6.06284	stromal_cell
cell_10X_P8_15_CACACTCCAATGAATG	-5.02051	-1.28705	stromal_cell
cell_10X_P8_15_CACACTCCATATACGC	-30.0292	-5.80971	stromal_cell
cell_10X_P8_15_CACACTCGTGCACCAC	10.1146	-40.2493	leukocyte
cell_10X_P8_15_CACACTCGTTACGACT	-3.93503	-0.801094	stromal_cell
cell_10X_P8_15_CACAGGCAGAGACTAT	3.61865	-5.47872	stromal_cell
cell_10X_P8_15_CACAGGCAGATGTGGC	22.9797	2.84315	endothelial_cell
cell_10X_P8_15_CACAGGCAGCCCGAAA	-24.3342	-4.73787	stromal_cell
cell_10X_P8_15_CACAGGCAGCCGTCGT	-6.28859	-3.55506	stromal_cell
cell_10X_P8_15_CACAGGCAGTACGATA	-26.199	-15.8977	stromal_cell
cell_10X_P8_15_CACAGGCCAAAGTGCG	9.65083	-45.6982	leukocyte
cell_10X_P8_15_CACAGGCCACCGCTAG	-16.3224	-21.4753	stromal_cell
cell_10X_P8_15_CACAGGCCATACTCTT	-13.9621	-3.45754	stromal_cell
cell_10X_P8_15_CACAGGCCATGACGGA	6.06292	-10.0663	stromal_cell
cell_10X_P8_15_CACAGGCGTCGCTTCT	0.591488	-6.78305	stromal_cell
cell_10X_P8_15_CACAGGCGTCTAGGTT	-37.9147	-12.7618	stromal_cell
cell_10X_P8_15_CACAGGCGTGTCAATC	-10.3889	-2.1313	stromal_cell
cell_10X_P8_15_CACAGGCGTGTCCTCT	43.053	-12.6299	epithelial_cell
cell_10X_P8_15_CACAGGCGTTCCCTTG	25.4875	13.3126	endothelial_cell
cell_10X_P8_15_CACAGGCTCCCGGATG	-0.596976	-5.87092	stromal_cell
cell_10X_P8_15_CACAGGCTCCGAACGC	-35.43	-6.25068	stromal_cell
cell_10X_P8_15_CACAGGCTCGTCGTTC	10.7278	-1.32666	stromal_cell
cell_10X_P8_15_CACAGGCTCTTGAGAC	22.2057	-2.95584	endothelial_cell
cell_10X_P8_15_CACAGGCTCTTTCCTC	4.34642	-9.94758	stromal_cell
cell_10X_P8_15_CACAGTACACGAAGCA	-31.8481	-21.2702	stromal_cell
cell_10X_P8_15_CACAGTACAGGCTGAA	-23.0961	-3.37876	stromal_cell
cell_10X_P8_15_CACAGTAGTCAATGTC	10.4585	-1.4505	stromal_cell
cell_10X_P8_15_CACAGTAGTGGCAAAC	-1.02618	-15.2128	stromal_cell
cell_10X_P8_15_CACAGTATCTCCCTGA	-0.452667	-45.6944	neuroendocrine_cell
cell_10X_P8_15_CACATAGAGACCCACC	-20.8392	-3.01539	stromal_cell
cell_10X_P8_15_CACATAGCATAGTAAG	-18.4305	-15.1598	stromal_cell
cell_10X_P8_15_CACATAGCATATGCTG	-26.7118	-5.14537	stromal_cell
cell_10X_P8_15_CACATAGGTATCACCA	5.44223	-7.06649	stromal_cell
cell_10X_P8_15_CACATAGGTCGGATCC	-39.4819	-2.58858	leukocyte
cell_10X_P8_15_CACATAGTCTAACCGA	-14.2231	-5.80718	stromal_cell
cell_10X_P8_15_CACATAGTCTTCAACT	-33.272	-9.69814	stromal_cell
cell_10X_P8_15_CACATTTAGACGCAAC	-12.1503	-14.6995	stromal_cell
cell_10X_P8_15_CACATTTAGCACCGCT	7.06593	-9.27776	stromal_cell
cell_10X_P8_15_CACATTTAGTGGACGT	10.6687	-40.0969	leukocyte
cell_10X_P8_15_CACATTTCATTGAGCT	40.7739	-16.0338	epithelial_cell
cell_10X_P8_15_CACATTTGTTCAACCA	-35.5678	-7.2391	stromal_cell
cell_10X_P8_15_CACATTTTCCGTAGGC	9.04682	-0.946459	stromal_cell
cell_10X_P8_15_CACCACTAGACCACGA	48.6237	-17.0283	epithelial_cell
cell_10X_P8_15_CACCACTAGCTCAACT	-6.97388	-13.9322	stromal_cell
cell_10X_P8_15_CACCACTAGTCGTTTG	-6.05103	-22.9626	stromal_cell
cell_10X_P8_15_CACCACTCACTAGTAC	-36.1175	-19.4808	stromal_cell
cell_10X_P8_15_CACCACTCAGCTCGCA	-32.5506	-4.37099	stromal_cell
cell_10X_P8_15_CACCACTCATCCGCGA	6.00675	-0.0439707	stromal_cell
cell_10X_P8_15_CACCACTGTAATCACC	-36.8397	-18.8368	stromal_cell
cell_10X_P8_15_CACCACTGTATTAGCC	-13.566	2.34016	neuroendocrine_cell
cell_10X_P8_15_CACCACTGTGTGAATA	-13.4123	-8.48979	stromal_cell
cell_10X_P8_15_CACCACTGTTCCCGAG	4.40184	0.479321	stromal_cell
cell_10X_P8_15_CACCACTGTTCGTGAT	-36.3908	-6.32454	stromal_cell
cell_10X_P8_15_CACCACTTCAAGGCTT	49.3352	-16.4994	epithelial_cell
cell_10X_P8_15_CACCACTTCAGCCTAA	20.9882	2.64635	endothelial_cell
cell_10X_P8_15_CACCACTTCGAACGGA	-22.3788	-11.7981	stromal_cell
cell_10X_P8_15_CACCACTTCTTGAGAC	-23.5655	-11.2865	stromal_cell
cell_10X_P8_15_CACCAGGAGCGCTTAT	-4.39205	-13.7847	stromal_cell
cell_10X_P8_15_CACCAGGCACGACGAA	-6.42639	-2.86145	stromal_cell
cell_10X_P8_15_CACCAGGCATTGAGCT	-26.8079	-7.60436	stromal_cell
cell_10X_P8_15_CACCAGGGTACAGTTC	-0.861513	-13.3372	stromal_cell
cell_10X_P8_15_CACCAGGGTTACGCGC	-4.43678	-2.07846	stromal_cell
cell_10X_P8_15_CACCAGGTCAGTCCCT	6.76586	-39.884	leukocyte
cell_10X_P8_15_CACCAGGTCGCCGTGA	2.09188	-14.1367	stromal_cell
cell_10X_P8_15_CACCAGGTCTACTTAC	0.915377	-5.2898	stromal_cell
cell_10X_P8_15_CACCTTGAGAGTAATC	3.90656	-9.70011	stromal_cell
cell_10X_P8_15_CACCTTGCAAGAAAGG	-28.262	-13.7206	stromal_cell
cell_10X_P8_15_CACCTTGCAAGTCTGT	14.0839	-35.8383	leukocyte
cell_10X_P8_15_CACCTTGCAGATCCAT	6.88842	-1.10009	stromal_cell
cell_10X_P8_15_CACCTTGCAGCTGTTA	4.61532	-5.91635	stromal_cell
cell_10X_P8_15_CACCTTGGTAGCTTGT	12.4986	-43.5104	leukocyte
cell_10X_P8_15_CACCTTGGTGTAAGTA	-23.283	-7.20112	stromal_cell
cell_10X_P8_15_CACCTTGTCACTATTC	4.32226	-1.13218	stromal_cell
cell_10X_P8_15_CACCTTGTCGCAGGCT	-33.5387	-10.6766	stromal_cell
cell_10X_P8_15_CACCTTGTCTCAACTT	11.2822	-1.82814	stromal_cell
cell_10X_P8_15_CACCTTGTCTTCCTTC	3.25522	-2.6061	stromal_cell
cell_10X_P8_15_CACTCCAAGACATAAC	10.8827	-38.2912	leukocyte
cell_10X_P8_15_CACTCCAAGACCCACC	-10.8267	-1.81487	stromal_cell
cell_10X_P8_15_CACTCCAAGGTTCCTA	-36.9913	-19.1356	stromal_cell
cell_10X_P8_15_CACTCCACAAGGACTG	45.6391	-16.0951	epithelial_cell
cell_10X_P8_15_CACTCCACAATAGCAA	-11.6783	-6.91299	stromal_cell
cell_10X_P8_15_CACTCCACACGAAACG	1.69905	-11.3725	stromal_cell
cell_10X_P8_15_CACTCCAGTCTAGCGC	4.07641	-7.53022	stromal_cell
cell_10X_P8_15_CACTCCATCAAGGCTT	11.1747	-2.67858	stromal_cell
cell_10X_P8_15_CACTCCATCCATGCTC	5.68913	-0.57352	stromal_cell
cell_10X_P8_15_CACTCCATCGGCTTGG	5.77443	-4.58103	stromal_cell
cell_10X_P8_15_CACTCCATCTTCATGT	-18.3425	-14.4758	stromal_cell
cell_10X_P8_15_CAGAATCAGAGCCTAG	-28.5078	-5.65831	stromal_cell
cell_10X_P8_15_CAGAATCAGCCGCCTA	-27.1318	-18.4582	stromal_cell
cell_10X_P8_15_CAGAATCAGCGAAGGG	-15.8571	-6.26148	stromal_cell
cell_10X_P8_15_CAGAATCAGCTATGCT	-8.70312	-5.76687	stromal_cell
cell_10X_P8_15_CAGAATCAGTTAGGTA	-36.1946	-18.0131	stromal_cell
cell_10X_P8_15_CAGAATCCAATAAGCA	12.4696	-38.5966	leukocyte
cell_10X_P8_15_CAGAATCCAGCCTGTG	8.10074	-7.84723	stromal_cell
cell_10X_P8_15_CAGAATCCAGGGATTG	1.28702	-11.2284	stromal_cell
cell_10X_P8_15_CAGAATCCATGGGACA	0.158648	-48.8169	endothelial_cell
cell_10X_P8_15_CAGAATCGTGCTGTAT	-3.53467	-3.82406	stromal_cell
cell_10X_P8_15_CAGAATCTCCTTGCCA	-14.5775	-14.8551	stromal_cell
cell_10X_P8_15_CAGAATCTCGATCCCT	4.61719	-1.33419	stromal_cell
cell_10X_P8_15_CAGAATCTCGCTTGTC	-17.1503	-11.8025	stromal_cell
cell_10X_P8_15_CAGAATCTCTATCCCG	4.64074	-7.02416	stromal_cell
cell_10X_P8_15_CAGAGAGAGACCTAGG	4.62219	-1.42705	stromal_cell
cell_10X_P8_15_CAGAGAGAGCATCATC	-8.60618	-14.5269	stromal_cell
cell_10X_P8_15_CAGAGAGAGTCCTCCT	-8.35015	-11.3194	stromal_cell
cell_10X_P8_15_CAGAGAGCAGACAGGT	-36.697	-5.93418	stromal_cell
cell_10X_P8_15_CAGAGAGGTAAGGGAA	2.91609	2.56345	stromal_cell
cell_10X_P8_15_CAGAGAGGTATGCTTG	0.533697	-3.94602	stromal_cell
cell_10X_P8_15_CAGAGAGTCAACCAAC	-13.432	-6.13745	stromal_cell
cell_10X_P8_15_CAGAGAGTCTCGATGA	-4.72202	-13.1794	stromal_cell
cell_10X_P8_15_CAGAGAGTCTCTTATG	-29.6347	-5.63539	stromal_cell
cell_10X_P8_15_CAGATCAAGAAGGCCT	-1.72177	-12.165	stromal_cell
cell_10X_P8_15_CAGATCAAGAGTACCG	7.69909	-8.08522	stromal_cell
cell_10X_P8_15_CAGATCAAGCAGGCTA	-10.3358	-19.8265	stromal_cell
cell_10X_P8_15_CAGATCAAGCTGCAAG	8.00193	-51.3175	leukocyte
cell_10X_P8_15_CAGATCAAGGAGTTGC	8.40236	-39.4568	leukocyte
cell_10X_P8_15_CAGATCACAGCCTGTG	11.0901	-3.0087	stromal_cell
cell_10X_P8_15_CAGATCAGTTCCCTTG	7.63755	-6.75475	stromal_cell
cell_10X_P8_15_CAGATCATCGAGAGCA	11.3224	-43.4978	leukocyte
cell_10X_P8_15_CAGATCATCTCGTTTA	45.5532	-16.2352	epithelial_cell
cell_10X_P8_15_CAGCAGCAGGGCTCTC	-14.5944	-1.72032	stromal_cell
cell_10X_P8_15_CAGCAGCAGTACGACG	-0.170852	-7.76719	stromal_cell
cell_10X_P8_15_CAGCAGCCACCCATTC	8.34356	0.935022	stromal_cell
cell_10X_P8_15_CAGCAGCCAGTATAAG	-33.3202	-3.42266	stromal_cell
cell_10X_P8_15_CAGCAGCCATGGGAAC	10.8278	-2.45064	stromal_cell
cell_10X_P8_15_CAGCAGCGTCTAGCCG	6.63952	-3.5168	stromal_cell
cell_10X_P8_15_CAGCAGCGTGTAACGG	-0.586511	-45.8667	neuroendocrine_cell
cell_10X_P8_15_CAGCAGCGTTGCCTCT	2.77781	-8.8436	stromal_cell
cell_10X_P8_15_CAGCAGCTCTCCAACC	8.92928	-46.5776	leukocyte
cell_10X_P8_15_CAGCATAAGAGTAATC	0.98391	-15.7946	stromal_cell
cell_10X_P8_15_CAGCATAAGATATACG	51.1243	-18.1934	epithelial_cell
cell_10X_P8_15_CAGCATACAAATCCGT	44.8205	-16.3173	epithelial_cell
cell_10X_P8_15_CAGCATACAACGATGG	-19.4938	-10.1387	stromal_cell
cell_10X_P8_15_CAGCATACATTGGGCC	-26.9354	-1.56013	stromal_cell
cell_10X_P8_15_CAGCATAGTAGCCTAT	-4.35376	-7.44996	stromal_cell
cell_10X_P8_15_CAGCATAGTCAGCTAT	-0.59279	-48.0298	neuroendocrine_cell
cell_10X_P8_15_CAGCATAGTGACGGTA	0.550474	-5.49634	stromal_cell
cell_10X_P8_15_CAGCATAGTGTCGCTG	-23.7953	-4.74432	stromal_cell
cell_10X_P8_15_CAGCATAGTTCGGCAC	-33.9568	-16.9583	stromal_cell
cell_10X_P8_15_CAGCATATCATGCTCC	-19.6824	-4.68916	stromal_cell
cell_10X_P8_15_CAGCATATCTTATCTG	0.151325	-1.61983	stromal_cell
cell_10X_P8_15_CAGCCGAAGCTGAAAT	-30.664	-11.4094	stromal_cell
cell_10X_P8_15_CAGCCGACACATCCGG	7.2215	-1.18382	stromal_cell
cell_10X_P8_15_CAGCCGATCTTGCAAG	-13.8481	-13.5204	stromal_cell
cell_10X_P8_15_CAGCGACAGCCACTAT	-27.659	-8.89479	stromal_cell
cell_10X_P8_15_CAGCGACCATACGCCG	9.30917	-49.0468	leukocyte
cell_10X_P8_15_CAGCGACCATGCAACT	0.382494	-48.1848	neuroendocrine_cell
cell_10X_P8_15_CAGCGACGTTGTCGCG	-2.71387	-5.39195	stromal_cell
cell_10X_P8_15_CAGCGACTCGGCTACG	51.6351	-18.57	epithelial_cell
cell_10X_P8_15_CAGCTAAAGAATCTCC	-8.21332	-14.3562	stromal_cell
cell_10X_P8_15_CAGCTAAAGCCCAATT	-32.3531	-3.71216	stromal_cell
cell_10X_P8_15_CAGCTAAAGCCCTAAT	-5.80918	-1.8105	stromal_cell
cell_10X_P8_15_CAGCTAACAAGGACAC	-32.1442	-9.4507	stromal_cell
cell_10X_P8_15_CAGCTAACACGCATCG	-29.3505	-10.738	stromal_cell
cell_10X_P8_15_CAGCTAAGTATATGGA	10.892	-50.1328	leukocyte
cell_10X_P8_15_CAGCTAAGTGATGCCC	-34.0438	-10.0532	stromal_cell
cell_10X_P8_15_CAGCTAAGTTACCAGT	-0.728385	-13.3311	stromal_cell
cell_10X_P8_15_CAGCTGGAGAGTCGGT	-27.1083	-7.26356	stromal_cell
cell_10X_P8_15_CAGCTGGAGATAGTCA	2.4278	-7.37457	stromal_cell
cell_10X_P8_15_CAGCTGGAGTAGGTGC	-11.0392	-5.4937	stromal_cell
cell_10X_P8_15_CAGCTGGCATGCAACT	-18.5158	-11.1413	stromal_cell
cell_10X_P8_15_CAGCTGGCATGGGAAC	12.8207	-37.6656	leukocyte
cell_10X_P8_15_CAGCTGGCATTCCTGC	-28.9202	-9.12828	stromal_cell
cell_10X_P8_15_CAGCTGGGTTGTCTTT	-6.46462	-17.074	stromal_cell
cell_10X_P8_15_CAGCTGGTCAACGGCC	5.51773	1.22255	stromal_cell
cell_10X_P8_15_CAGCTGGTCCCTAATT	-29.0061	-4.8833	stromal_cell
cell_10X_P8_15_CAGCTGGTCGAATGGG	-20.2838	-2.21224	stromal_cell
cell_10X_P8_15_CAGCTGGTCTGTTGAG	-10.5751	-12.2133	stromal_cell
cell_10X_P8_15_CAGCTGGTCTTACCGC	-26.7315	-1.88571	stromal_cell
cell_10X_P8_15_CAGGTGCAGTACACCT	-34.5735	-14.1851	stromal_cell
cell_10X_P8_15_CAGGTGCAGTAGCGGT	10.9222	8.1421	neuroendocrine_cell
cell_10X_P8_15_CAGGTGCAGTATTGGA	-12.951	-12.7643	stromal_cell
cell_10X_P8_15_CAGGTGCCAAAGTCAA	7.26699	-44.8832	leukocyte
cell_10X_P8_15_CAGGTGCCAATACGCT	-8.33341	-16.7664	stromal_cell
cell_10X_P8_15_CAGGTGCCACGGCGTT	11.2689	-1.89345	stromal_cell
cell_10X_P8_15_CAGGTGCCAGCTGTAT	-6.24271	-15.5325	stromal_cell
cell_10X_P8_15_CAGGTGCCATATGCTG	-33.8446	-4.36836	stromal_cell
cell_10X_P8_15_CAGGTGCGTCCAAGTT	25.0476	8.18298	endothelial_cell
cell_10X_P8_15_CAGGTGCGTCTCACCT	9.10252	8.06027	neuroendocrine_cell
cell_10X_P8_15_CAGGTGCGTTGGGACA	-5.27027	-17.5073	stromal_cell
cell_10X_P8_15_CAGGTGCTCGCAAGCC	44.8311	-15.1943	epithelial_cell
cell_10X_P8_15_CAGGTGCTCTACTTAC	-29.9901	-19.1439	stromal_cell
cell_10X_P8_15_CAGGTGCTCTTTACGT	-7.50817	-21.3352	stromal_cell
cell_10X_P8_15_CAGTAACAGGGCACTA	-20.608	-2.57504	stromal_cell
cell_10X_P8_15_CAGTAACAGTCTCCTC	-4.88399	-17.9488	stromal_cell
cell_10X_P8_15_CAGTAACCAAGGCTCC	21.4312	3.65692	endothelial_cell
cell_10X_P8_15_CAGTAACCACTCGACG	1.01149	-13.2356	stromal_cell
cell_10X_P8_15_CAGTAACCAGCGAACA	-2.73457	-17.2798	stromal_cell
cell_10X_P8_15_CAGTAACCAGGACCCT	-3.4395	-2.26111	stromal_cell
cell_10X_P8_15_CAGTAACGTAATCGTC	7.6037	-46.2355	leukocyte
cell_10X_P8_15_CAGTAACGTCTAGTGT	-5.75693	-21.1243	stromal_cell
cell_10X_P8_15_CAGTAACGTGAGGGAG	10.9392	-45.1692	leukocyte
cell_10X_P8_15_CAGTCCTAGATTACCC	-5.32615	-10.4894	stromal_cell
cell_10X_P8_15_CAGTCCTAGGAATCGC	-33.4397	-5.19609	stromal_cell
cell_10X_P8_15_CAGTCCTAGGGTTCCC	-8.91878	-12.9331	stromal_cell
cell_10X_P8_15_CAGTCCTTCTCTTATG	54.4363	-19.3685	epithelial_cell
cell_10X_P8_15_CATATGGCACAAGCCC	20.8636	1.73172	endothelial_cell
cell_10X_P8_15_CATATGGCACCCAGTG	14.142	-35.4992	leukocyte
cell_10X_P8_15_CATATGGCAGTCACTA	-16.5339	-11.1005	stromal_cell
cell_10X_P8_15_CATATGGCATCCGTGG	-37.015	-6.05456	stromal_cell
cell_10X_P8_15_CATATGGCATGCAACT	-11.0623	-10.4915	stromal_cell
cell_10X_P8_15_CATATGGGTCTTGCGG	11.0474	-1.03957	stromal_cell
cell_10X_P8_15_CATATGGTCGGCCGAT	-38.6711	-18.2172	stromal_cell
cell_10X_P8_15_CATATGGTCTCTGTCG	-35.3016	-6.17965	stromal_cell
cell_10X_P8_15_CATATTCAGAGGTAGA	51.6344	-19.2188	epithelial_cell
cell_10X_P8_15_CATATTCAGGACCACA	-2.57249	-16.3639	stromal_cell
cell_10X_P8_15_CATATTCCAAGCTGGA	-11.3039	-19.9571	stromal_cell
cell_10X_P8_15_CATATTCCACCCATGG	-1.27055	-42.727	neuroendocrine_cell
cell_10X_P8_15_CATATTCGTCTCTTTA	-24.5209	-15.8231	stromal_cell
cell_10X_P8_15_CATATTCGTGATAAGT	-32.8224	-14.2438	stromal_cell
cell_10X_P8_15_CATATTCGTGTTGAGG	20.6606	6.10038	endothelial_cell
cell_10X_P8_15_CATATTCGTTACCAGT	-29.7307	-8.20498	stromal_cell
cell_10X_P8_15_CATATTCGTTTAGCTG	20.5801	-3.30614	endothelial_cell
cell_10X_P8_15_CATCAAGAGTCGTACT	-17.9657	-14.3602	stromal_cell
cell_10X_P8_15_CATCAAGCACGGTAAG	-12.5211	-8.92118	stromal_cell
cell_10X_P8_15_CATCAAGGTATCTGCA	-11.9658	-8.42379	stromal_cell
cell_10X_P8_15_CATCAAGGTCTGCGGT	11.6014	-44.7949	leukocyte
cell_10X_P8_15_CATCAAGGTTATCGGT	-6.00233	-9.68474	stromal_cell
cell_10X_P8_15_CATCAAGTCCTGTACC	6.88521	-3.4774	stromal_cell
cell_10X_P8_15_CATCAAGTCTATCGCC	-16.4172	-12.3775	stromal_cell
cell_10X_P8_15_CATCAAGTCTGATTCT	-12.0599	-15.7577	stromal_cell
cell_10X_P8_15_CATCAGAAGCTGCAAG	-37.6001	-7.4769	stromal_cell
cell_10X_P8_15_CATCAGAAGGCGATAC	-6.17643	-21.0725	stromal_cell
cell_10X_P8_15_CATCAGAAGGCGCTCT	-4.49906	-2.54876	stromal_cell
cell_10X_P8_15_CATCAGAAGGTGTTAA	4.83047	-6.16805	stromal_cell
cell_10X_P8_15_CATCAGAGTAATAGCA	11.0223	8.24064	neuroendocrine_cell
cell_10X_P8_15_CATCAGAGTTAGAACA	-7.22011	-21.1277	stromal_cell
cell_10X_P8_15_CATCAGATCACGATGT	-29.4918	-21.6442	stromal_cell
cell_10X_P8_15_CATCAGATCCTATTCA	2.61225	-6.06297	stromal_cell
cell_10X_P8_15_CATCCACAGCAGGTCA	-31.6665	-6.47563	stromal_cell
cell_10X_P8_15_CATCCACCACCAACCG	3.26685	-11.7672	stromal_cell
cell_10X_P8_15_CATCCACCAGTAACGG	-19.7734	-4.81082	stromal_cell
cell_10X_P8_15_CATCCACCATGCCTTC	-5.28131	-8.33749	stromal_cell
cell_10X_P8_15_CATCCACGTCTCTTAT	-20.2704	-7.93715	stromal_cell
cell_10X_P8_15_CATCCACGTGCAGTAG	-28.4856	-11.5065	stromal_cell
cell_10X_P8_15_CATCCACTCACCGTAA	-8.33322	-21.8706	stromal_cell
cell_10X_P8_15_CATCCACTCGACAGCC	-22.408	-17.7278	stromal_cell
cell_10X_P8_15_CATCCACTCTACGAGT	-9.41611	-23.456	stromal_cell
cell_10X_P8_15_CATCCACTCTACTATC	8.93436	0.468911	stromal_cell
cell_10X_P8_15_CATCGAAAGAGTAATC	-34.1867	-9.9166	stromal_cell
cell_10X_P8_15_CATCGAAAGCTGATAA	-34.6824	-14.5499	stromal_cell
cell_10X_P8_15_CATCGAAAGTGAAGTT	-0.00724701	-47.0665	neuroendocrine_cell
cell_10X_P8_15_CATCGAACAAGTACCT	-5.51183	-8.03899	stromal_cell
cell_10X_P8_15_CATCGAACATACAGCT	-0.129741	0.576317	stromal_cell
cell_10X_P8_15_CATCGAACATGGGACA	4.34574	-4.58252	stromal_cell
cell_10X_P8_15_CATCGAATCGCCAGCA	23.2845	4.86949	endothelial_cell
cell_10X_P8_15_CATCGGGAGAGGGCTT	-32.5767	-7.40579	stromal_cell
cell_10X_P8_15_CATCGGGAGCCGGTAA	5.08178	-9.03866	stromal_cell
cell_10X_P8_15_CATCGGGAGCGTCTAT	-20.4174	-21.7948	stromal_cell
cell_10X_P8_15_CATCGGGCACGACGAA	-29.2421	-9.06508	stromal_cell
cell_10X_P8_15_CATCGGGGTATTACCG	5.11912	1.40522	stromal_cell
cell_10X_P8_15_CATCGGGGTCGGCACT	-35.1572	-8.43853	stromal_cell
cell_10X_P8_15_CATCGGGTCATGTGGT	-10.9606	-5.01249	stromal_cell
cell_10X_P8_15_CATCGGGTCGGAGGTA	-8.26598	-17.4753	stromal_cell
cell_10X_P8_15_CATGACAAGAAGGGTA	-11.7009	-19.4509	stromal_cell
cell_10X_P8_15_CATGACAAGATGAGAG	51.7968	-18.6774	epithelial_cell
cell_10X_P8_15_CATGACAAGTGTTGAA	-11.137	-10.3591	stromal_cell
cell_10X_P8_15_CATGACACATCGATTG	-22.6463	-7.94686	stromal_cell
cell_10X_P8_15_CATGACAGTCATATGC	20.9793	-1.76815	endothelial_cell
cell_10X_P8_15_CATGACAGTGTTTGGT	1.02441	4.4343	leukocyte
cell_10X_P8_15_CATGACATCAACGGGA	19.2398	-45.0692	leukocyte
cell_10X_P8_15_CATGACATCGGTCCGA	4.48378	-3.93666	stromal_cell
cell_10X_P8_15_CATGACATCGGTCTAA	-6.1538	-3.57719	stromal_cell
cell_10X_P8_15_CATGACATCGTCTGAA	1.86321	-14.2984	stromal_cell
cell_10X_P8_15_CATGACATCGTTTATC	1.84131	-4.2868	stromal_cell
cell_10X_P8_15_CATGCCTAGCGTCAAG	-27.063	-18.7208	stromal_cell
cell_10X_P8_15_CATGCCTAGGATGTAT	-3.43629	-7.8593	stromal_cell
cell_10X_P8_15_CATGCCTAGGGTGTTG	8.25955	-6.85307	stromal_cell
cell_10X_P8_15_CATGCCTAGTTAAGTG	23.0913	7.09607	endothelial_cell
cell_10X_P8_15_CATGCCTGTCTGCAAT	8.64462	-2.51308	stromal_cell
cell_10X_P8_15_CATGCCTGTGCACGAA	-13.9757	-19.3445	stromal_cell
cell_10X_P8_15_CATGCCTTCGCATGAT	2.40035	-3.40951	stromal_cell
cell_10X_P8_15_CATGGCGAGACTTTCG	-3.49488	-15.5945	stromal_cell
cell_10X_P8_15_CATGGCGCAAAGAATC	4.19558	-9.29459	stromal_cell
cell_10X_P8_15_CATGGCGCAGCTGTGC	-6.33248	-2.04157	stromal_cell
cell_10X_P8_15_CATGGCGGTCCAGTTA	9.65985	-1.30703	stromal_cell
cell_10X_P8_15_CATGGCGTCATAACCG	21.9821	-3.44659	endothelial_cell
cell_10X_P8_15_CATGGCGTCTTTACAC	2.96883	-1.70485	stromal_cell
cell_10X_P8_15_CATTATCAGAGCTTCT	-21.5404	-20.1381	stromal_cell
cell_10X_P8_15_CATTATCAGATGGGTC	-1.33138	-42.7137	neuroendocrine_cell
cell_10X_P8_15_CATTATCAGGCAGGTT	-11.5288	-17.5025	stromal_cell
cell_10X_P8_15_CATTATCCAATGGATA	8.87193	-2.28292	stromal_cell
cell_10X_P8_15_CATTATCCACGGTAGA	-34.5495	-7.48016	stromal_cell
cell_10X_P8_15_CATTATCCAGCTGCTG	-15.0425	-3.00046	stromal_cell
cell_10X_P8_15_CATTATCCATAAGACA	-6.96003	-18.5741	stromal_cell
cell_10X_P8_15_CATTATCCATGCATGT	-34.7799	-3.64711	stromal_cell
cell_10X_P8_15_CATTATCGTACAGACG	2.07213	-7.20255	stromal_cell
cell_10X_P8_15_CATTATCGTCTAAACC	-12.079	-13.3094	stromal_cell
cell_10X_P8_15_CATTATCTCGTCCGTT	-35.3118	-6.06503	stromal_cell
cell_10X_P8_15_CATTATCTCTTGAGGT	-10.665	-5.85098	stromal_cell
cell_10X_P8_15_CATTCGCAGAACTCGG	-4.01462	-13.2068	stromal_cell
cell_10X_P8_15_CATTCGCAGAGCTTCT	4.30697	-13.7047	stromal_cell
cell_10X_P8_15_CATTCGCAGCTTATCG	48.4528	-17.4552	epithelial_cell
cell_10X_P8_15_CATTCGCAGTGATCGG	1.81132	-6.94397	stromal_cell
cell_10X_P8_15_CATTCGCCATGCGCAC	-7.04437	-14.3856	stromal_cell
cell_10X_P8_15_CATTCGCGTAGAGTGC	-19.9141	-5.31029	stromal_cell
cell_10X_P8_15_CATTCGCGTGAGGCTA	-10.9025	-0.768751	stromal_cell
cell_10X_P8_15_CATTCGCGTGGGTATG	-14.2727	-6.24407	stromal_cell
cell_10X_P8_15_CATTCGCTCGCAAACT	-28.3877	-13.3282	stromal_cell
cell_10X_P8_15_CATTCGCTCGGAGGTA	-12.7838	-10.6539	stromal_cell
cell_10X_P8_15_CCAATCCAGACTACAA	-10.0653	-18.7015	stromal_cell
cell_10X_P8_15_CCAATCCAGCTTATCG	-34.7477	-16.0225	stromal_cell
cell_10X_P8_15_CCAATCCAGGGTATCG	-25.2039	-4.21223	stromal_cell
cell_10X_P8_15_CCAATCCCACGTCAGC	-11.9502	-10.9773	stromal_cell
cell_10X_P8_15_CCAATCCGTCTAGTGT	4.18428	-7.35966	stromal_cell
cell_10X_P8_15_CCAATCCGTTGGTAAA	1.21494	-4.91127	stromal_cell
cell_10X_P8_15_CCAATCCTCAGTTAGC	-15.9877	-4.11634	stromal_cell
cell_10X_P8_15_CCAATCCTCCAAGTAC	-27.1921	-18.0786	stromal_cell
cell_10X_P8_15_CCAATCCTCTCCGGTT	-33.469	-4.50794	stromal_cell
cell_10X_P8_15_CCAATCCTCTGAGTGT	-22.1288	-20.5712	stromal_cell
cell_10X_P8_15_CCACCTAAGATCCCAT	-0.54599	-46.2929	neuroendocrine_cell
cell_10X_P8_15_CCACCTAAGGAGCGTT	14.4791	-34.7363	leukocyte
cell_10X_P8_15_CCACCTACAAACGCGA	-0.214403	-5.78439	stromal_cell
cell_10X_P8_15_CCACCTACACCGCTAG	9.19308	-5.55344	stromal_cell
cell_10X_P8_15_CCACCTACAGGGCATA	-13.4882	-4.28259	stromal_cell
cell_10X_P8_15_CCACCTACATGCGCAC	-36.0969	-6.86992	stromal_cell
cell_10X_P8_15_CCACCTAGTAAATGTG	-39.5956	-2.47984	leukocyte
cell_10X_P8_15_CCACCTAGTGGCTCCA	10.236	-5.1336	stromal_cell
cell_10X_P8_15_CCACCTATCAACCATG	-12.0275	3.2843	neuroendocrine_cell
cell_10X_P8_15_CCACCTATCAGTCAGT	1.89778	-14.0641	stromal_cell
cell_10X_P8_15_CCACCTATCGAATCCA	-10.4262	-2.492	stromal_cell
cell_10X_P8_15_CCACCTATCTTGTACT	-0.587397	-46.4848	neuroendocrine_cell
cell_10X_P8_15_CCACGGAAGCGAAGGG	-11.4548	-5.36948	stromal_cell
cell_10X_P8_15_CCACGGACAAGCGCTC	-26.4649	-5.68934	stromal_cell
cell_10X_P8_15_CCACGGACAAGTAATG	-10.9817	-8.70969	stromal_cell
cell_10X_P8_15_CCACGGACAGACAAGC	-14.4317	-16.3842	stromal_cell
cell_10X_P8_15_CCACGGACAGCCAGAA	-12.697	-19.6742	stromal_cell
cell_10X_P8_15_CCACGGACAGCTATTG	-2.70616	-7.67653	stromal_cell
cell_10X_P8_15_CCACGGACAGGGCATA	-6.62239	-15.0525	stromal_cell
cell_10X_P8_15_CCACGGAGTAAACCTC	4.12804	-3.40397	stromal_cell
cell_10X_P8_15_CCACGGATCTGGCGTG	41.5321	-21.4453	epithelial_cell
cell_10X_P8_15_CCACTACAGCAGCCTC	-30.0027	-21.657	stromal_cell
cell_10X_P8_15_CCACTACCACCGTTGG	11.4182	-2.1213	stromal_cell
cell_10X_P8_15_CCACTACGTAGAGGAA	-30.7778	-4.27751	stromal_cell
cell_10X_P8_15_CCACTACGTAGCGTAG	10.893	-45.1526	leukocyte
cell_10X_P8_15_CCACTACGTATGGTTC	10.1269	-1.88748	stromal_cell
cell_10X_P8_15_CCACTACGTGGCTCCA	-1.37746	-9.70806	stromal_cell
cell_10X_P8_15_CCACTACGTTAGAACA	11.8279	-44.4454	leukocyte
cell_10X_P8_15_CCACTACTCAAAGTAG	-15.7872	-15.1093	stromal_cell
cell_10X_P8_15_CCACTACTCACCCTCA	12.1119	-44.9527	leukocyte
cell_10X_P8_15_CCACTACTCCGCGCAA	-22.2688	-20.5022	stromal_cell
cell_10X_P8_15_CCAGCGAAGCTAGTGG	-5.93496	-19.1608	stromal_cell
cell_10X_P8_15_CCAGCGAAGCTCCTCT	-12.7439	-18.8813	stromal_cell
cell_10X_P8_15_CCAGCGACAGGCGATA	-24.0486	-4.59314	stromal_cell
cell_10X_P8_15_CCAGCGACATTGGCGC	-29.1863	-7.01311	stromal_cell
cell_10X_P8_15_CCAGCGAGTTCGAATC	-21.3932	-11.965	stromal_cell
cell_10X_P8_15_CCAGCGAGTTCTCATT	10.1197	-1.6826	stromal_cell
cell_10X_P8_15_CCATGTCAGATCCGAG	4.19365	-3.68057	stromal_cell
cell_10X_P8_15_CCATGTCAGCGATGAC	43.9384	-15.8052	epithelial_cell
cell_10X_P8_15_CCATGTCAGCGTAATA	-32.9674	-19.1202	stromal_cell
cell_10X_P8_15_CCATGTCAGGTGACCA	-14.5572	-6.36267	stromal_cell
cell_10X_P8_15_CCATGTCGTGTCCTCT	-2.42076	-1.60105	stromal_cell
cell_10X_P8_15_CCATGTCTCAGGTTCA	11.3743	-39.5047	leukocyte
cell_10X_P8_15_CCATGTCTCGTCCGTT	-21.5939	-14.3286	stromal_cell
cell_10X_P8_15_CCATGTCTCGTCTGAA	-29.0385	-12.5322	stromal_cell
cell_10X_P8_15_CCATGTCTCTCCAGGG	-2.06225	-14.4012	stromal_cell
cell_10X_P8_15_CCATTCGAGCGATATA	-11.5448	-4.38637	stromal_cell
cell_10X_P8_15_CCATTCGAGTGTTGAA	4.36856	-4.17076	stromal_cell
cell_10X_P8_15_CCATTCGCAAGCTGGA	-21.3542	-11.126	stromal_cell
cell_10X_P8_15_CCATTCGCAGCCTTTC	-13.3761	-20.9482	stromal_cell
cell_10X_P8_15_CCATTCGGTACTCAAC	-35.8127	-18.8036	stromal_cell
cell_10X_P8_15_CCATTCGGTATATGAG	-35.424	-8.16498	stromal_cell
cell_10X_P8_15_CCATTCGGTCGAATCT	8.60925	-39.5164	leukocyte
cell_10X_P8_15_CCATTCGTCAGATAAG	9.79029	-5.50759	stromal_cell
cell_10X_P8_15_CCATTCGTCTCGATGA	-0.0519135	-13.0326	stromal_cell
cell_10X_P8_15_CCCAATCAGATAGGAG	-8.99443	-5.14338	stromal_cell
cell_10X_P8_15_CCCAATCAGGATGGAA	2.78542	-4.37139	stromal_cell
cell_10X_P8_15_CCCAATCAGGTTCCTA	11.0012	-1.07013	stromal_cell
cell_10X_P8_15_CCCAATCCACCAACCG	-34.8416	-8.98011	stromal_cell
cell_10X_P8_15_CCCAATCCACCCAGTG	-35.387	-16.0308	stromal_cell
cell_10X_P8_15_CCCAATCCACGAAACG	41.9579	-13.9986	epithelial_cell
cell_10X_P8_15_CCCAATCTCCTAAGTG	11.0496	7.35768	neuroendocrine_cell
cell_10X_P8_15_CCCAGTTAGAAGGACA	-9.34121	-3.64683	stromal_cell
cell_10X_P8_15_CCCAGTTAGCCGGTAA	-0.623131	-48.1436	neuroendocrine_cell
cell_10X_P8_15_CCCAGTTAGTTGTCGT	-20.3788	-9.85241	stromal_cell
cell_10X_P8_15_CCCAGTTCACGCCAGT	-37.3642	-17.658	stromal_cell
cell_10X_P8_15_CCCAGTTCAGTATAAG	-3.56199	-0.543162	stromal_cell
cell_10X_P8_15_CCCAGTTGTAACGTTC	-12.3839	-6.66751	stromal_cell
cell_10X_P8_15_CCCAGTTGTTTGTTTC	24.7389	-3.99274	endothelial_cell
cell_10X_P8_15_CCCAGTTTCCCAAGAT	7.2405	-0.303556	stromal_cell
cell_10X_P8_15_CCCAGTTTCCCAAGTA	-6.22676	-17.5966	stromal_cell
cell_10X_P8_15_CCCAGTTTCTTACCTA	-30.5344	-21.0836	stromal_cell
cell_10X_P8_15_CCCATACAGCTTATCG	-11.7851	-13.9117	stromal_cell
cell_10X_P8_15_CCCATACAGTACGCCC	-13.1261	-3.26918	stromal_cell
cell_10X_P8_15_CCCATACAGTCATGCT	-2.06494	-17.2267	stromal_cell
cell_10X_P8_15_CCCATACCAAGTTGTC	-35.9651	-14.973	stromal_cell
cell_10X_P8_15_CCCATACCATCTGGTA	-6.6728	-14.976	stromal_cell
cell_10X_P8_15_CCCATACGTAAATACG	-1.54756	-14.3804	stromal_cell
cell_10X_P8_15_CCCATACGTAAGGGAA	-4.90323	-12.984	stromal_cell
cell_10X_P8_15_CCCATACGTGGCCCTA	-19.935	-4.48993	stromal_cell
cell_10X_P8_15_CCCATACTCAATAAGG	11.3153	-45.1332	leukocyte
cell_10X_P8_15_CCCATACTCACTTCAT	-12.5008	-15.8259	stromal_cell
cell_10X_P8_15_CCCTCCTAGAATGTTG	-3.45577	-2.95017	stromal_cell
cell_10X_P8_15_CCCTCCTAGGCAAAGA	-30.9577	-21.8385	stromal_cell
cell_10X_P8_15_CCCTCCTAGGTTACCT	0.329306	-13.705	stromal_cell
cell_10X_P8_15_CCCTCCTGTAAATGAC	2.1833	-2.53523	stromal_cell
cell_10X_P8_15_CCCTCCTTCACGCGGT	-33.4563	-10.4157	stromal_cell
cell_10X_P8_15_CCCTCCTTCACTATTC	-35.1292	-10.868	stromal_cell
cell_10X_P8_15_CCCTCCTTCAGTGTTG	-2.32932	-6.95592	stromal_cell
cell_10X_P8_15_CCCTCCTTCCAACCAA	-8.59226	-15.5555	stromal_cell
cell_10X_P8_15_CCCTCCTTCGGTTCGG	-25.1063	-6.23262	stromal_cell
cell_10X_P8_15_CCCTCCTTCTCTGCTG	-10.121	-9.99737	stromal_cell
cell_10X_P8_15_CCGGGATAGGGATCTG	3.6151	-11.2795	stromal_cell
cell_10X_P8_15_CCGGGATGTCACTGGC	-6.3514	-12.5397	stromal_cell
cell_10X_P8_15_CCGGGATGTCGCGGTT	4.97033	-13.0295	stromal_cell
cell_10X_P8_15_CCGGGATTCAGCTCTC	-5.93463	-3.71957	stromal_cell
cell_10X_P8_15_CCGGGATTCATGCATG	-25.8224	-3.46415	stromal_cell
cell_10X_P8_15_CCGGGATTCTATGTGG	5.2584	-1.42884	stromal_cell
cell_10X_P8_15_CCGGTAGAGCTAACTC	-9.06535	-23.4725	stromal_cell
cell_10X_P8_15_CCGGTAGAGTCCCACG	-17.8429	-11.5909	stromal_cell
cell_10X_P8_15_CCGGTAGAGTTAGCGG	2.95059	-15.72	stromal_cell
cell_10X_P8_15_CCGGTAGCACATTTCT	6.70075	-8.5353	stromal_cell
cell_10X_P8_15_CCGGTAGCAGATGAGC	-8.81041	-5.17745	stromal_cell
cell_10X_P8_15_CCGGTAGCATCGACGC	0.502662	-48.3666	neuroendocrine_cell
cell_10X_P8_15_CCGGTAGGTCCATGAT	10.5681	-38.0381	leukocyte
cell_10X_P8_15_CCGGTAGGTGATGTGG	-29.2578	-10.2064	stromal_cell
cell_10X_P8_15_CCGGTAGTCGTAGGAG	-6.52161	-3.61978	stromal_cell
cell_10X_P8_15_CCGGTAGTCTTCATGT	-31.2045	-3.34432	stromal_cell
cell_10X_P8_15_CCGTACTAGAAGCCCA	-23.4823	-1.04533	stromal_cell
cell_10X_P8_15_CCGTACTAGGTGATTA	-29.1112	-14.2314	stromal_cell
cell_10X_P8_15_CCGTACTAGTGTTTGC	-12.6004	-17.5919	stromal_cell
cell_10X_P8_15_CCGTACTCAAAGGCGT	9.73534	-3.41788	stromal_cell
cell_10X_P8_15_CCGTACTCAACCGCCA	-27.6235	-5.40375	stromal_cell
cell_10X_P8_15_CCGTACTCACTTAAGC	1.20777	-2.81563	stromal_cell
cell_10X_P8_15_CCGTACTCATCCCATC	-3.95365	-13.9719	stromal_cell
cell_10X_P8_15_CCGTACTGTCTGCGGT	-11.5745	-3.02948	stromal_cell
cell_10X_P8_15_CCGTACTGTGTGAATA	-35.8884	-9.7027	stromal_cell
cell_10X_P8_15_CCGTACTGTGTTAAGA	-33.0655	-15.0391	stromal_cell
cell_10X_P8_15_CCGTACTGTTAAAGAC	6.41706	0.0212808	stromal_cell
cell_10X_P8_15_CCGTACTTCAATACCG	-24.0495	-12.7299	stromal_cell
cell_10X_P8_15_CCGTACTTCCAACCAA	3.9623	-1.59881	stromal_cell
cell_10X_P8_15_CCGTACTTCGAGAGCA	49.8314	-18.7008	epithelial_cell
cell_10X_P8_15_CCGTACTTCGATAGAA	9.90131	-43.9163	leukocyte
cell_10X_P8_15_CCGTGGAAGAATGTGT	-15.8117	-10.3006	stromal_cell
cell_10X_P8_15_CCGTGGAAGTTTAGGA	8.33809	0.978918	stromal_cell
cell_10X_P8_15_CCGTGGACAAATTGCC	9.94438	-3.19426	stromal_cell
cell_10X_P8_15_CCGTGGACACCCATTC	2.59984	1.20557	stromal_cell
cell_10X_P8_15_CCGTGGACATGACATC	-32.6397	-8.3685	stromal_cell
cell_10X_P8_15_CCGTGGAGTCACTTCC	4.65769	-11.2373	stromal_cell
cell_10X_P8_15_CCGTGGAGTCTAGCGC	-31.8234	-19.5728	stromal_cell
cell_10X_P8_15_CCGTGGATCTGATACG	8.88383	-47.6386	leukocyte
cell_10X_P8_15_CCGTTCAAGAGGTTGC	5.19362	-5.52818	stromal_cell
cell_10X_P8_15_CCGTTCAAGATGTGTA	2.07869	-8.7884	stromal_cell
cell_10X_P8_15_CCGTTCAAGGTAGCCA	5.29496	-5.5936	stromal_cell
cell_10X_P8_15_CCGTTCAAGTTAGCGG	4.36861	-3.99152	stromal_cell
cell_10X_P8_15_CCGTTCACATGCAATC	13.4797	-37.0813	leukocyte
cell_10X_P8_15_CCGTTCACATGGATGG	-29.3495	-8.10586	stromal_cell
cell_10X_P8_15_CCTAAAGAGAGTAAGG	-34.88	-12.0822	stromal_cell
cell_10X_P8_15_CCTAAAGAGCACCGCT	-32.6448	-16.4644	stromal_cell
cell_10X_P8_15_CCTAAAGCATCAGTAC	43.258	-12.6466	epithelial_cell
cell_10X_P8_15_CCTAAAGGTGCTCTTC	9.72126	-48.552	leukocyte
cell_10X_P8_15_CCTAAAGTCATTGCCC	-13.1194	4.89352	stromal_cell
cell_10X_P8_15_CCTAAAGTCGCAGGCT	16.2176	-47.9467	leukocyte
cell_10X_P8_15_CCTAAAGTCTCAACTT	-14.6122	-15.0515	stromal_cell
cell_10X_P8_15_CCTACACAGCTACCGC	3.57367	-11.5104	stromal_cell
cell_10X_P8_15_CCTACACAGCTAGTCT	3.13148	-6.75943	stromal_cell
cell_10X_P8_15_CCTACACAGTGTCCCG	-26.5511	-4.43818	stromal_cell
cell_10X_P8_15_CCTACACCAAGCGTAG	-0.412968	-45.597	neuroendocrine_cell
cell_10X_P8_15_CCTACACGTCCTAGCG	10.6418	-40.3285	leukocyte
cell_10X_P8_15_CCTACACGTGACAAAT	-23.0802	-1.63619	stromal_cell
cell_10X_P8_15_CCTACACGTGCCTGGT	10.6363	-1.23361	stromal_cell
cell_10X_P8_15_CCTACACTCCTATTCA	-20.621	-8.8061	stromal_cell
cell_10X_P8_15_CCTACACTCGCCTGAG	-6.28224	-2.17915	stromal_cell
cell_10X_P8_15_CCTACCACAGACACTT	-0.55845	-7.71877	stromal_cell
cell_10X_P8_15_CCTACCACAGAGTGTG	-0.540575	-48.2037	neuroendocrine_cell
cell_10X_P8_15_CCTACCATCTGGCGAC	-31.4143	-2.2639	stromal_cell
cell_10X_P8_15_CCTAGCTAGAAGGACA	-8.16862	-19.5484	stromal_cell
cell_10X_P8_15_CCTAGCTAGCCCGAAA	-3.82486	-8.68797	stromal_cell
cell_10X_P8_15_CCTAGCTAGGCTAGGT	10.8775	-2.85927	stromal_cell
cell_10X_P8_15_CCTAGCTCACGTAAGG	-11.2206	-18.2596	stromal_cell
cell_10X_P8_15_CCTAGCTCAGCCTGTG	-23.6913	-3.61729	stromal_cell
cell_10X_P8_15_CCTAGCTCAGGTGCCT	-11.7636	-11.3865	stromal_cell
cell_10X_P8_15_CCTAGCTGTAAAGTCA	-12.2338	-20.5776	stromal_cell
cell_10X_P8_15_CCTAGCTTCAACGGCC	-1.71231	-0.390962	stromal_cell
cell_10X_P8_15_CCTAGCTTCAATACCG	-10.0565	-2.80906	stromal_cell
cell_10X_P8_15_CCTAGCTTCATGTAGC	0.754778	-4.67089	stromal_cell
cell_10X_P8_15_CCTATTAAGAACTGTA	-36.4073	-19.8528	stromal_cell
cell_10X_P8_15_CCTATTAAGCCAGAAC	-2.76037	-15.0677	stromal_cell
cell_10X_P8_15_CCTATTAAGGGATACC	-7.56596	-21.6453	stromal_cell
cell_10X_P8_15_CCTATTAAGGGTATCG	-6.1286	-1.95432	stromal_cell
cell_10X_P8_15_CCTATTACACCATCCT	53.5445	-20.1018	epithelial_cell
cell_10X_P8_15_CCTATTACATGGGAAC	44.8207	-15.3369	epithelial_cell
cell_10X_P8_15_CCTATTAGTCAACTGT	5.4601	-11.8364	stromal_cell
cell_10X_P8_15_CCTATTAGTTACCGAT	10.3902	-3.85879	stromal_cell
cell_10X_P8_15_CCTATTATCAGCAACT	1.91109	-13.9748	stromal_cell
cell_10X_P8_15_CCTATTATCATCTGCC	-10.3476	-20.0285	stromal_cell
cell_10X_P8_15_CCTATTATCTATCGCC	-9.97941	-19.4194	stromal_cell
cell_10X_P8_15_CCTCAGTAGACTACAA	49.9133	-19.4713	epithelial_cell
cell_10X_P8_15_CCTCAGTCACACCGCA	42.2922	-13.9435	epithelial_cell
cell_10X_P8_15_CCTCAGTCAGAAGCAC	1.92235	-10.8486	stromal_cell
cell_10X_P8_15_CCTCAGTCAGCATACT	5.1665	-10.8448	stromal_cell
cell_10X_P8_15_CCTCAGTGTTCCGTCT	-8.9786	-17.3957	stromal_cell
cell_10X_P8_15_CCTCAGTTCAGAGCTT	-0.956014	-7.79117	stromal_cell
cell_10X_P8_15_CCTCAGTTCAGGCGAA	3.93788	-1.82851	stromal_cell
cell_10X_P8_15_CCTCAGTTCATACGGT	-4.83803	-8.68739	stromal_cell
cell_10X_P8_15_CCTCAGTTCCAAGTAC	-33.2255	-16.9254	stromal_cell
cell_10X_P8_15_CCTCAGTTCCATGAGT	13.5886	-36.9554	leukocyte
cell_10X_P8_15_CCTCAGTTCGAATGGG	11.0853	-2.24177	stromal_cell
cell_10X_P8_15_CCTCTGACAAGACGTG	2.70239	-2.42055	stromal_cell
cell_10X_P8_15_CCTCTGACAATGGACG	-8.77302	-17.8893	stromal_cell
cell_10X_P8_15_CCTCTGAGTCCTCTTG	9.48183	-3.50039	stromal_cell
cell_10X_P8_15_CCTCTGAGTTCCACTC	-3.15206	-13.0347	stromal_cell
cell_10X_P8_15_CCTTACGAGCGTGAAC	-1.37269	-0.151207	stromal_cell
cell_10X_P8_15_CCTTACGAGGTACTCT	9.67584	-5.55085	stromal_cell
cell_10X_P8_15_CCTTACGCAAGCTGAG	2.81977	-10.9708	stromal_cell
cell_10X_P8_15_CCTTACGCATGTAGTC	-11.2277	-18.2505	stromal_cell
cell_10X_P8_15_CCTTACGGTCACCTAA	-13.9902	-17.872	stromal_cell
cell_10X_P8_15_CCTTACGGTCCGACGT	52.2497	-17.5918	epithelial_cell
cell_10X_P8_15_CCTTACGGTGCTTCTC	-22.5374	-6.52573	stromal_cell
cell_10X_P8_15_CCTTACGTCAGAGCTT	9.26307	-2.62879	stromal_cell
cell_10X_P8_15_CCTTACGTCCAAATGC	13.1652	-36.6562	leukocyte
cell_10X_P8_15_CCTTACGTCCACGTTC	3.42336	2.296	stromal_cell
cell_10X_P8_15_CCTTACGTCCTTGACC	-7.44031	-21.2504	stromal_cell
cell_10X_P8_15_CCTTCCCAGATAGGAG	5.0335	0.249807	stromal_cell
cell_10X_P8_15_CCTTCCCAGGTGCAAC	-13.0708	4.41831	neuroendocrine_cell
cell_10X_P8_15_CCTTCCCAGTTTGCGT	-26.2035	-5.57772	stromal_cell
cell_10X_P8_15_CCTTCCCCACGAAATA	-6.27864	-15.805	stromal_cell
cell_10X_P8_15_CCTTCCCCATATACCG	-3.20772	-12.2933	stromal_cell
cell_10X_P8_15_CCTTCCCCATGGTCAT	12.8567	-35.0003	leukocyte
cell_10X_P8_15_CCTTCCCGTCACTTCC	-21.2009	-9.74133	stromal_cell
cell_10X_P8_15_CCTTCCCGTCGGCATC	3.70744	-1.8883	stromal_cell
cell_10X_P8_15_CCTTCCCGTGACCAAG	8.95192	-45.5981	leukocyte
cell_10X_P8_15_CCTTCCCGTTCGTGAT	-0.336512	-13.5552	stromal_cell
cell_10X_P8_15_CCTTCCCTCCGAATGT	-6.55676	-17.0582	stromal_cell
cell_10X_P8_15_CCTTCCCTCGTGGACC	-34.7977	-6.97471	stromal_cell
cell_10X_P8_15_CCTTCCCTCTATCGCC	0.600317	0.506143	stromal_cell
cell_10X_P8_15_CCTTCGAAGAAGGTGA	-13.2886	-2.49453	stromal_cell
cell_10X_P8_15_CCTTCGAAGCACCGTC	-7.22379	-20.2103	stromal_cell
cell_10X_P8_15_CCTTCGACAAGCTGTT	16.185	-48.1175	leukocyte
cell_10X_P8_15_CCTTCGACAGTATGCT	5.45738	-10.4981	stromal_cell
cell_10X_P8_15_CCTTCGAGTCGAGTTT	-12.0824	-7.84762	stromal_cell
cell_10X_P8_15_CCTTCGAGTCGGGTCT	-10.4214	-8.66314	stromal_cell
cell_10X_P8_15_CCTTCGAGTCTTCGTC	-27.8323	-9.53787	stromal_cell
cell_10X_P8_15_CCTTCGAGTGGCGAAT	12.194	-38.4042	leukocyte
cell_10X_P8_15_CCTTTCTAGAGCCTAG	7.38847	-47.7293	leukocyte
cell_10X_P8_15_CCTTTCTAGTGCCATT	4.00444	-9.5076	stromal_cell
cell_10X_P8_15_CCTTTCTCAAGCCGTC	12.084	-44.5869	leukocyte
cell_10X_P8_15_CCTTTCTCAATCACAC	-13.7255	-13.8325	stromal_cell
cell_10X_P8_15_CCTTTCTCAGTTAACC	-20.3581	-12.352	stromal_cell
cell_10X_P8_15_CCTTTCTGTCTTCGTC	-5.46611	-3.62568	stromal_cell
cell_10X_P8_15_CCTTTCTGTGGTACAG	4.56383	-5.27553	stromal_cell
cell_10X_P8_15_CCTTTCTGTTCGCTAA	0.230891	-1.57486	stromal_cell
cell_10X_P8_15_CCTTTCTTCATTATCC	-0.170303	-0.258588	stromal_cell
cell_10X_P8_15_CCTTTCTTCCGCGCAA	-30.3695	-19.6919	stromal_cell
cell_10X_P8_15_CCTTTCTTCGAACGGA	21.6417	-3.20709	endothelial_cell
cell_10X_P8_15_CCTTTCTTCTGCAGTA	-21.418	-19.2977	stromal_cell
cell_10X_P8_15_CGAACATAGCGATCCC	-24.0649	-12.0284	stromal_cell
cell_10X_P8_15_CGAACATAGGCATTGG	25.8518	8.57115	endothelial_cell
cell_10X_P8_15_CGAACATAGGTGTGGT	-2.32802	-1.81605	stromal_cell
cell_10X_P8_15_CGAACATAGTCATCCA	5.70566	-1.20492	stromal_cell
cell_10X_P8_15_CGAACATCAAAGGCGT	-31.0858	-19.9439	stromal_cell
cell_10X_P8_15_CGAACATCACAGGAGT	-6.71476	-14.0037	stromal_cell
cell_10X_P8_15_CGAACATCAGCTGTGC	5.42245	-0.227275	stromal_cell
cell_10X_P8_15_CGAACATGTCCAGTGC	-35.4101	-11.0519	stromal_cell
cell_10X_P8_15_CGAACATGTCGGGTCT	49.1554	-19.0113	epithelial_cell
cell_10X_P8_15_CGAACATGTGTAACGG	-4.01963	-7.44175	stromal_cell
cell_10X_P8_15_CGAACATTCGTCTGAA	-0.484584	-8.94888	stromal_cell
cell_10X_P8_15_CGAACATTCTCAAACG	-14.8293	-6.5057	stromal_cell
cell_10X_P8_15_CGAATGTAGAGACTTA	-3.51834	-11.0515	stromal_cell
cell_10X_P8_15_CGAATGTAGGACACCA	-32.6862	-6.93956	stromal_cell
cell_10X_P8_15_CGAATGTAGGAGTTTA	1.8646	-14.6432	stromal_cell
cell_10X_P8_15_CGAATGTAGGGCTTGA	-5.58926	-1.24771	stromal_cell
cell_10X_P8_15_CGAATGTAGTATCGAA	-34.9168	-6.19794	stromal_cell
cell_10X_P8_15_CGAATGTGTATATCCG	-6.42042	-3.06866	stromal_cell
cell_10X_P8_15_CGAATGTGTTAAAGTG	-6.20618	-2.80872	stromal_cell
cell_10X_P8_15_CGAATGTGTTACAGAA	-21.184	-18.8285	stromal_cell
cell_10X_P8_15_CGAATGTTCCCTAACC	-6.31835	-8.65307	stromal_cell
cell_10X_P8_15_CGAATGTTCTAACCGA	-24.8626	-15.6414	stromal_cell
cell_10X_P8_15_CGAATGTTCTCGATGA	-28.9565	-8.08774	stromal_cell
cell_10X_P8_15_CGACCTTAGAAAGTGG	1.06406	4.39349	leukocyte
cell_10X_P8_15_CGACCTTAGCGTGTCC	-34.4608	-9.75844	stromal_cell
cell_10X_P8_15_CGACCTTAGCTAGTCT	19.7531	3.75146	endothelial_cell
cell_10X_P8_15_CGACCTTGTCACTGGC	0.499217	-14.8159	stromal_cell
cell_10X_P8_15_CGACCTTGTCCGACGT	-3.32819	-18.864	stromal_cell
cell_10X_P8_15_CGACCTTGTTGCTCCT	5.98127	1.22296	stromal_cell
cell_10X_P8_15_CGACCTTTCTACTATC	-3.1069	-0.781673	stromal_cell
cell_10X_P8_15_CGACTTCAGCTCAACT	-1.8499	-1.08988	stromal_cell
cell_10X_P8_15_CGACTTCAGGTGCAAC	-12.5736	-19.7778	stromal_cell
cell_10X_P8_15_CGACTTCCAGTTCCCT	10.3843	-48.2833	leukocyte
cell_10X_P8_15_CGACTTCGTGAAAGAG	-10.6215	-2.0992	stromal_cell
cell_10X_P8_15_CGACTTCGTTCCACGG	-33.2875	-10.0497	stromal_cell
cell_10X_P8_15_CGACTTCGTTTGTGTG	44.0867	-16.0352	epithelial_cell
cell_10X_P8_15_CGACTTCTCAACTCTT	4.27574	-10.8386	stromal_cell
cell_10X_P8_15_CGACTTCTCCTTGACC	-0.115196	0.498838	stromal_cell
cell_10X_P8_15_CGACTTCTCTGAGGGA	2.88224	-6.17203	stromal_cell
cell_10X_P8_15_CGACTTCTCTTGTTTG	3.70943	-5.96449	stromal_cell
cell_10X_P8_15_CGAGAAGAGACCTAGG	9.25472	-5.74131	stromal_cell
cell_10X_P8_15_CGAGAAGAGCACCGCT	9.91792	-6.48389	stromal_cell
cell_10X_P8_15_CGAGAAGAGTGCCAGA	-4.39973	-13.5311	stromal_cell
cell_10X_P8_15_CGAGAAGCAATGAATG	3.86223	5.24742	neuroendocrine_cell
cell_10X_P8_15_CGAGAAGCACTGTTAG	2.47636	-7.91638	stromal_cell
cell_10X_P8_15_CGAGAAGTCAGTTAGC	-12.6145	-14.2065	stromal_cell
cell_10X_P8_15_CGAGAAGTCGCATGGC	-13.8939	2.11466	neuroendocrine_cell
cell_10X_P8_15_CGAGCACAGGAATCGC	-0.414893	-16.9509	stromal_cell
cell_10X_P8_15_CGAGCACAGTGGAGAA	-4.71788	-10.4585	stromal_cell
cell_10X_P8_15_CGAGCACCACATCTTT	8.7307	-38.405	leukocyte
cell_10X_P8_15_CGAGCACCACGAGGTA	46.5201	-15.1631	epithelial_cell
cell_10X_P8_15_CGAGCACCATCACAAC	-28.1713	-19.7102	stromal_cell
cell_10X_P8_15_CGAGCACCATTGCGGC	1.03302	-10.0473	stromal_cell
cell_10X_P8_15_CGAGCACGTGTAATGA	-8.09835	-13.5722	stromal_cell
cell_10X_P8_15_CGAGCACGTTACCAGT	-15.1393	2.31847	neuroendocrine_cell
cell_10X_P8_15_CGAGCACTCCCTTGCA	-24.8397	-4.54381	stromal_cell
cell_10X_P8_15_CGAGCACTCCTGCTTG	-4.4104	0.195551	stromal_cell
cell_10X_P8_15_CGAGCACTCTACTCAT	9.17064	-3.26451	stromal_cell
cell_10X_P8_15_CGAGCACTCTCTGAGA	-11.4328	-6.02305	stromal_cell
cell_10X_P8_15_CGAGCACTCTGGCGTG	11.1193	-1.01922	stromal_cell
cell_10X_P8_15_CGAGCCAAGAGCTTCT	-35.4822	-14.2488	stromal_cell
cell_10X_P8_15_CGAGCCACACTTCTGC	-10.8371	-10.1601	stromal_cell
cell_10X_P8_15_CGAGCCACATCCTAGA	5.15466	-1.0412	stromal_cell
cell_10X_P8_15_CGAGCCACATTCTCAT	-25.6489	-7.04132	stromal_cell
cell_10X_P8_15_CGAGCCAGTTCGTTGA	-11.8222	-9.99028	stromal_cell
cell_10X_P8_15_CGAGCCAGTTGAACTC	-23.4795	-7.12783	stromal_cell
cell_10X_P8_15_CGAGCCATCGCCCTTA	5.4073	-6.11334	stromal_cell
cell_10X_P8_15_CGAGCCATCGGTCTAA	10.269	-1.75654	stromal_cell
cell_10X_P8_15_CGAGCCATCGTGACAT	-30.225	-5.63574	stromal_cell
cell_10X_P8_15_CGATCGGAGATCTGCT	-11.8398	-12.2322	stromal_cell
cell_10X_P8_15_CGATCGGAGGTAAACT	-2.15923	-2.48938	stromal_cell
cell_10X_P8_15_CGATCGGCAAGCTGGA	-10.1128	-15.9342	stromal_cell
cell_10X_P8_15_CGATCGGGTACCGTAT	-11.3153	-0.709932	stromal_cell
cell_10X_P8_15_CGATCGGGTTTAGCTG	-15.8286	-20.1466	stromal_cell
cell_10X_P8_15_CGATCGGTCGGAATCT	-18.5659	-13.9002	stromal_cell
cell_10X_P8_15_CGATCGGTCTATCGCC	-1.3642	-0.197705	stromal_cell
cell_10X_P8_15_CGATCGGTCTGCGGCA	9.01872	0.563161	stromal_cell
cell_10X_P8_15_CGATGGCAGGACATTA	-5.07335	-8.07205	stromal_cell
cell_10X_P8_15_CGATGGCAGTGTGGCA	2.25406	-11.093	stromal_cell
cell_10X_P8_15_CGATGGCCAACTTGAC	3.03948	-0.595374	stromal_cell
cell_10X_P8_15_CGATGGCGTCCCGACA	-2.24398	0.0966502	stromal_cell
cell_10X_P8_15_CGATGGCGTCGGCATC	-32.9709	-18.781	stromal_cell
cell_10X_P8_15_CGATGGCTCAATCACG	5.48301	-7.66881	stromal_cell
cell_10X_P8_15_CGATGGCTCCCGGATG	-17.5509	-15.928	stromal_cell
cell_10X_P8_15_CGATGGCTCCTTGACC	-26.0575	-3.57097	stromal_cell
cell_10X_P8_15_CGATGGCTCTCATTCA	4.98943	-12.951	stromal_cell
cell_10X_P8_15_CGATGGCTCTTGCATT	10.6436	-45.7465	leukocyte
cell_10X_P8_15_CGATGTAAGACGCTTT	5.82531	-10.3303	stromal_cell
cell_10X_P8_15_CGATGTAAGAGACTTA	-18.6237	-12.8296	stromal_cell
cell_10X_P8_15_CGATGTAAGGATGCGT	-14.4087	-2.72199	stromal_cell
cell_10X_P8_15_CGATGTACACATCCAA	10.0046	-7.65602	stromal_cell
cell_10X_P8_15_CGATGTACAGATGGGT	-37.5401	-13.6019	stromal_cell
cell_10X_P8_15_CGATGTACAGCCACCA	20.5412	-3.64408	endothelial_cell
cell_10X_P8_15_CGATGTACATGCCCGA	11.4651	-4.87248	stromal_cell
cell_10X_P8_15_CGATGTAGTCTGGAGA	-2.83428	-3.01551	stromal_cell
cell_10X_P8_15_CGATGTAGTGAAAGAG	-5.10478	-18.6177	stromal_cell
cell_10X_P8_15_CGATGTAGTTACCGAT	-11.8022	-11.2113	stromal_cell
cell_10X_P8_15_CGATGTAGTTGATTCG	-2.91203	-17.2217	stromal_cell
cell_10X_P8_15_CGATGTATCAAAGTAG	-0.511274	-17.4953	stromal_cell
cell_10X_P8_15_CGATGTATCACAATGC	-9.19927	-4.33532	stromal_cell
cell_10X_P8_15_CGATGTATCCCACTTG	-5.78915	-15.05	stromal_cell
cell_10X_P8_15_CGATGTATCGCAAGCC	-11.9883	-19.2781	stromal_cell
cell_10X_P8_15_CGATTGAAGGCAGTCA	-1.72666	-16.5846	stromal_cell
cell_10X_P8_15_CGATTGAAGTGGGCTA	-15.7756	-20.9497	stromal_cell
cell_10X_P8_15_CGATTGACACATTCGA	-14.0685	-3.69133	stromal_cell
cell_10X_P8_15_CGATTGACATCATCCC	-5.03469	-12.8148	stromal_cell
cell_10X_P8_15_CGATTGAGTGCAACGA	-29.8732	-6.00489	stromal_cell
cell_10X_P8_15_CGATTGATCATAAAGG	-6.38081	-2.54788	stromal_cell
cell_10X_P8_15_CGATTGATCGGCTTGG	9.48745	-8.81264	stromal_cell
cell_10X_P8_15_CGATTGATCGTTACAG	3.77492	-1.9387	stromal_cell
cell_10X_P8_15_CGCCAAGAGAATTGTG	-9.05139	-5.1987	stromal_cell
cell_10X_P8_15_CGCCAAGCAAGTTGTC	-21.1999	-21.1382	stromal_cell
cell_10X_P8_15_CGCCAAGCAATGGACG	-7.80305	-21.7966	stromal_cell
cell_10X_P8_15_CGCCAAGCAGGAACGT	2.04685	1.05667	stromal_cell
cell_10X_P8_15_CGCCAAGGTCCGAATT	3.79419	-5.97795	stromal_cell
cell_10X_P8_15_CGCCAAGGTCGGGTCT	-19.7066	-7.60682	stromal_cell
cell_10X_P8_15_CGCCAAGGTTGAGTTC	23.4798	2.75594	endothelial_cell
cell_10X_P8_15_CGCGGTAAGAAAGTGG	5.34254	-7.96624	stromal_cell
cell_10X_P8_15_CGCGGTAAGAATTCCC	19.0138	-44.5347	leukocyte
cell_10X_P8_15_CGCGGTAAGCCAACAG	44.5198	-14.6427	epithelial_cell
cell_10X_P8_15_CGCGGTAAGTCGTACT	-9.22949	-23.6369	stromal_cell
cell_10X_P8_15_CGCGGTACAAAGCGGT	-23.3557	-5.12942	stromal_cell
cell_10X_P8_15_CGCGGTACAGCCAGAA	-15.0131	-5.43515	stromal_cell
cell_10X_P8_15_CGCGGTACATAACCTG	-36.3723	-10.5024	stromal_cell
cell_10X_P8_15_CGCGGTACATCTATGG	-17.6835	-12.459	stromal_cell
cell_10X_P8_15_CGCGGTAGTCCGAAGA	54.7627	-19.7713	epithelial_cell
cell_10X_P8_15_CGCGGTATCAACACAC	-8.22457	-12.0417	stromal_cell
cell_10X_P8_15_CGCGGTATCCCAGGTG	4.47158	-0.916856	stromal_cell
cell_10X_P8_15_CGCGGTATCTGTCTCG	-22.4962	-5.98803	stromal_cell
cell_10X_P8_15_CGCGTTTAGTGGTAGC	-7.21081	-20.7309	stromal_cell
cell_10X_P8_15_CGCGTTTCACCTTGTC	43.481	-12.4829	epithelial_cell
cell_10X_P8_15_CGCGTTTCATTCCTGC	-6.96634	-12.9976	stromal_cell
cell_10X_P8_15_CGCGTTTCATTCTCAT	-20.458	-10.5881	stromal_cell
cell_10X_P8_15_CGCGTTTGTCTACCTC	-28.2857	-14.259	stromal_cell
cell_10X_P8_15_CGCGTTTGTCTCGTTC	-5.58113	-13.0295	stromal_cell
cell_10X_P8_15_CGCGTTTGTCTCTTTA	-9.21821	-23.5116	stromal_cell
cell_10X_P8_15_CGCGTTTGTGGCAAAC	-27.6265	-15.0865	stromal_cell
cell_10X_P8_15_CGCGTTTGTGTTCGAT	50.5957	-17.3029	epithelial_cell
cell_10X_P8_15_CGCGTTTTCCTTTACA	-0.158189	-8.53146	stromal_cell
cell_10X_P8_15_CGCGTTTTCGACAGCC	-0.751481	-45.9414	neuroendocrine_cell
cell_10X_P8_15_CGCGTTTTCGTTTATC	-2.03205	-2.18795	stromal_cell
cell_10X_P8_15_CGCGTTTTCTTAGAGC	4.49625	-6.45678	stromal_cell
cell_10X_P8_15_CGCTATCAGTGAAGTT	11.377	-2.86008	stromal_cell
cell_10X_P8_15_CGCTATCCAAGCCGCT	-0.365522	-5.30799	stromal_cell
cell_10X_P8_15_CGCTATCCAATGAAAC	9.59934	-9.23307	stromal_cell
cell_10X_P8_15_CGCTATCCAATGGTCT	7.2535	-5.71636	stromal_cell
cell_10X_P8_15_CGCTATCGTCAGTGGA	-5.95152	-23.2347	stromal_cell
cell_10X_P8_15_CGCTATCGTGCACGAA	-14.0233	-3.42613	stromal_cell
cell_10X_P8_15_CGCTATCTCAGGATCT	-18.7877	-4.3799	stromal_cell
cell_10X_P8_15_CGCTATCTCTGGTATG	-26.7274	-4.30129	stromal_cell
cell_10X_P8_15_CGCTGGAAGGAGCGAG	-9.95564	-18.3367	stromal_cell
cell_10X_P8_15_CGCTGGACAATCGGTT	-5.46312	-5.15299	stromal_cell
cell_10X_P8_15_CGCTGGACACCGAATT	-10.3195	-1.57039	stromal_cell
cell_10X_P8_15_CGCTGGAGTAAGGGCT	-30.7348	-20.1034	stromal_cell
cell_10X_P8_15_CGCTGGAGTCGACTAT	-4.02052	-1.79644	stromal_cell
cell_10X_P8_15_CGCTGGAGTCGTGGCT	-15.699	-7.68809	stromal_cell
cell_10X_P8_15_CGCTGGAGTCTACCTC	-22.3584	-2.15928	stromal_cell
cell_10X_P8_15_CGCTTCAGTGCCTGGT	10.5628	-3.85862	stromal_cell
cell_10X_P8_15_CGGACACAGACAATAC	14.1437	-35.7193	leukocyte
cell_10X_P8_15_CGGACACAGATGTAAC	-15.7731	-9.70689	stromal_cell
cell_10X_P8_15_CGGACACAGCGTGAAC	8.13205	-1.17275	stromal_cell
cell_10X_P8_15_CGGACACAGGTCGGAT	5.09117	-2.94447	stromal_cell
cell_10X_P8_15_CGGACACAGTGGGATC	5.44497	-0.158946	stromal_cell
cell_10X_P8_15_CGGACACAGTGTTGAA	-32.6008	-2.4874	stromal_cell
cell_10X_P8_15_CGGACACAGTTTAGGA	-16.8822	-18.9224	stromal_cell
cell_10X_P8_15_CGGACACCAGGTGGAT	1.84191	-10.9144	stromal_cell
cell_10X_P8_15_CGGACACCATGGTCTA	5.939	0.675925	stromal_cell
cell_10X_P8_15_CGGACACGTATCTGCA	-9.89574	-2.88681	stromal_cell
cell_10X_P8_15_CGGACACGTGAAAGAG	-11.6771	-11.4873	stromal_cell
cell_10X_P8_15_CGGACACTCGATGAGG	-0.594143	-5.41749	stromal_cell
cell_10X_P8_15_CGGACACTCGTACCGG	-33.0785	-21.7316	stromal_cell
cell_10X_P8_15_CGGACACTCTCGCATC	-9.44864	-0.618229	stromal_cell
cell_10X_P8_15_CGGACACTCTGTCCGT	-3.04701	-1.3812	stromal_cell
cell_10X_P8_15_CGGACGTGTCCGCTGA	26.2844	11.8014	endothelial_cell
cell_10X_P8_15_CGGACGTGTGAGCGAT	-33.8182	-3.73725	stromal_cell
cell_10X_P8_15_CGGACGTGTGTTTGTG	-38.6017	-5.0313	stromal_cell
cell_10X_P8_15_CGGACGTGTTATTCTC	-8.93153	-4.61481	stromal_cell
cell_10X_P8_15_CGGACGTGTTCCGGCA	-0.406162	-47.6522	neuroendocrine_cell
cell_10X_P8_15_CGGACGTGTTTAAGCC	1.97242	-10.3584	stromal_cell
cell_10X_P8_15_CGGACGTTCACAGTAC	-6.05111	-15.4267	stromal_cell
cell_10X_P8_15_CGGACGTTCTTGTTTG	9.20746	-3.8554	stromal_cell
cell_10X_P8_15_CGGACTGAGAGAGCTC	-6.91834	-3.56242	stromal_cell
cell_10X_P8_15_CGGACTGAGTTAACGA	-35.8856	-7.91792	stromal_cell
cell_10X_P8_15_CGGACTGCAACAACCT	-35.5624	-11.449	stromal_cell
cell_10X_P8_15_CGGACTGCACTTACGA	10.1074	-5.5694	stromal_cell
cell_10X_P8_15_CGGACTGTCCGTAGGC	-15.3387	-22.1596	stromal_cell
cell_10X_P8_15_CGGACTGTCGACCAGC	-14.2634	-22.9049	stromal_cell
cell_10X_P8_15_CGGACTGTCTCGCATC	-35.7851	-16.8057	stromal_cell
cell_10X_P8_15_CGGAGCTAGCGAGAAA	-13.3622	-11.5468	stromal_cell
cell_10X_P8_15_CGGAGCTAGCTCCTTC	-11.9239	-11.3347	stromal_cell
cell_10X_P8_15_CGGAGCTAGGGTATCG	-16.1888	-7.65765	stromal_cell
cell_10X_P8_15_CGGAGCTAGTCCCACG	-7.20951	-10.035	stromal_cell
cell_10X_P8_15_CGGAGCTAGTCTCCTC	-1.2243	-12.5315	stromal_cell
cell_10X_P8_15_CGGAGCTAGTGCAAGC	-11.2731	-4.20818	stromal_cell
cell_10X_P8_15_CGGAGCTCAAATACAG	-2.51083	-9.66353	stromal_cell
cell_10X_P8_15_CGGAGCTCACAGTCGC	-12.6569	-10.7383	stromal_cell
cell_10X_P8_15_CGGAGCTCATTACCTT	-16.0547	-14.3665	stromal_cell
cell_10X_P8_15_CGGAGCTGTCGAAAGC	-11.1953	-15.1384	stromal_cell
cell_10X_P8_15_CGGAGCTGTGAGGGAG	-4.59706	-7.62163	stromal_cell
cell_10X_P8_15_CGGAGCTGTGAGTATA	-20.1502	-15.2245	stromal_cell
cell_10X_P8_15_CGGAGCTTCAAACCAC	11.1375	-45.0574	leukocyte
cell_10X_P8_15_CGGAGCTTCTTTCCTC	-5.15894	-11.1918	stromal_cell
cell_10X_P8_15_CGGAGTCAGAATCTCC	-6.70436	-21.4172	stromal_cell
cell_10X_P8_15_CGGAGTCAGCCAACAG	-7.27003	-6.36497	stromal_cell
cell_10X_P8_15_CGGAGTCAGCGATATA	-25.0278	-4.16505	stromal_cell
cell_10X_P8_15_CGGAGTCAGTGCTGCC	-14.2206	-10.493	stromal_cell
cell_10X_P8_15_CGGAGTCAGTGTCCAT	-1.85056	-0.94595	stromal_cell
cell_10X_P8_15_CGGAGTCCAATGGAAT	-19.4534	-15.2873	stromal_cell
cell_10X_P8_15_CGGAGTCCACCAGATT	-6.19107	-7.57334	stromal_cell
cell_10X_P8_15_CGGAGTCCAGCCTATA	3.17412	-0.55208	stromal_cell
cell_10X_P8_15_CGGAGTCCAGGAATCG	2.73078	-6.7652	stromal_cell
cell_10X_P8_15_CGGAGTCCATCGATTG	-15.7425	-20.1286	stromal_cell
cell_10X_P8_15_CGGAGTCGTAGGGACT	-11.9768	-11.2983	stromal_cell
cell_10X_P8_15_CGGAGTCGTCCGAAGA	-20.2541	-15.0551	stromal_cell
cell_10X_P8_15_CGGAGTCGTGACTCAT	8.69022	-7.29554	stromal_cell
cell_10X_P8_15_CGGAGTCGTTCCGGCA	-15.7361	-5.78474	stromal_cell
cell_10X_P8_15_CGGAGTCTCACAATGC	51.5296	-19.1035	epithelial_cell
cell_10X_P8_15_CGGAGTCTCCGCAAGC	12.7585	-38.109	leukocyte
cell_10X_P8_15_CGGCTAGAGAAACCAT	-13.2745	-9.27268	stromal_cell
cell_10X_P8_15_CGGCTAGAGTCATCCA	-0.49509	-48.0309	neuroendocrine_cell
cell_10X_P8_15_CGGCTAGAGTGAACAT	-37.4407	-18.5042	stromal_cell
cell_10X_P8_15_CGGCTAGCACATCTTT	-23.467	-7.25522	stromal_cell
cell_10X_P8_15_CGGCTAGCATCGGTTA	11.5627	-48.8766	leukocyte
cell_10X_P8_15_CGGCTAGTCCTGCTTG	5.0379	-2.54937	stromal_cell
cell_10X_P8_15_CGGCTAGTCGGAAATA	-16.8265	-6.28775	stromal_cell
cell_10X_P8_15_CGGCTAGTCTGGCGAC	-10.8179	-8.12584	stromal_cell
cell_10X_P8_15_CGGGTCAAGACAAAGG	49.4441	-18.7377	epithelial_cell
cell_10X_P8_15_CGGGTCAGTTACGCGC	7.97977	-8.1679	stromal_cell
cell_10X_P8_15_CGGGTCAGTTCCACAA	1.13758	-4.94257	stromal_cell
cell_10X_P8_15_CGGGTCAGTTCCCGAG	-7.45183	-4.08567	stromal_cell
cell_10X_P8_15_CGGGTCATCACAATGC	4.67037	-0.0537581	stromal_cell
cell_10X_P8_15_CGGGTCATCACCAGGC	25.7711	8.5237	endothelial_cell
cell_10X_P8_15_CGGTTAAAGGTGCTAG	8.01599	-8.03854	stromal_cell
cell_10X_P8_15_CGGTTAAAGTAGCCGA	45.5072	-14.9092	epithelial_cell
cell_10X_P8_15_CGGTTAACAGCCTTTC	-11.6841	-6.52658	stromal_cell
cell_10X_P8_15_CGGTTAACATACTCTT	-0.859637	-9.99556	stromal_cell
cell_10X_P8_15_CGGTTAACATGCGCAC	5.41017	-0.517481	stromal_cell
cell_10X_P8_15_CGGTTAAGTCGGCACT	-15.4694	-17.6673	stromal_cell
cell_10X_P8_15_CGGTTAATCCAGTATG	-35.7972	-9.55295	stromal_cell
cell_10X_P8_15_CGGTTAATCGCATGGC	-10.0751	-19.532	stromal_cell
cell_10X_P8_15_CGGTTAATCGTAGGAG	-5.55384	-16.8557	stromal_cell
cell_10X_P8_15_CGGTTAATCTTAGAGC	2.29448	-2.16971	stromal_cell
cell_10X_P8_15_CGGTTAATCTTTACAC	11.8742	-35.7422	leukocyte
cell_10X_P8_15_CGTAGCGCAAGAGGCT	0.638067	-4.35108	stromal_cell
cell_10X_P8_15_CGTAGCGCACATTCGA	24.1622	5.55099	endothelial_cell
cell_10X_P8_15_CGTAGCGGTAACGCGA	3.41512	-4.93715	stromal_cell
cell_10X_P8_15_CGTAGCGGTCACTGGC	26.7196	11.9265	endothelial_cell
cell_10X_P8_15_CGTAGCGGTCGAACAG	22.66	5.69254	endothelial_cell
cell_10X_P8_15_CGTAGCGGTGGTAACG	7.98265	-39.3103	leukocyte
cell_10X_P8_15_CGTAGCGGTTTACTCT	3.11947	1.31599	stromal_cell
cell_10X_P8_15_CGTAGCGGTTTGACAC	2.27523	-5.65421	stromal_cell
cell_10X_P8_15_CGTAGCGTCACTCCTG	7.53464	-1.07998	stromal_cell
cell_10X_P8_15_CGTAGGCAGAAGGTTT	14.3139	-34.8541	leukocyte
cell_10X_P8_15_CGTAGGCAGAGCTGCA	49.6584	-19.1379	epithelial_cell
cell_10X_P8_15_CGTAGGCAGTCCTCCT	11.1726	6.66472	neuroendocrine_cell
cell_10X_P8_15_CGTAGGCCATACCATG	-20.137	-8.27351	stromal_cell
cell_10X_P8_15_CGTAGGCGTCAGAAGC	0.702681	-10.7463	stromal_cell
cell_10X_P8_15_CGTAGGCGTCGGCACT	42.0836	-15.3117	epithelial_cell
cell_10X_P8_15_CGTAGGCGTTCATGGT	-7.79575	-15.0701	stromal_cell
cell_10X_P8_15_CGTAGGCTCAACGAAA	3.61282	-4.31386	stromal_cell
cell_10X_P8_15_CGTAGGCTCACCGGGT	21.0171	-1.49562	endothelial_cell
cell_10X_P8_15_CGTCACTAGTGACATA	8.24672	-7.37177	stromal_cell
cell_10X_P8_15_CGTCACTCACAAGCCC	7.55406	-8.06637	stromal_cell
cell_10X_P8_15_CGTCACTCACCGCTAG	9.07375	-38.3079	leukocyte
cell_10X_P8_15_CGTCACTCACTGTGTA	-6.11425	-8.67303	stromal_cell
cell_10X_P8_15_CGTCACTGTGAACCTT	-13.0664	-6.16814	stromal_cell
cell_10X_P8_15_CGTCACTGTTTGTTTC	-33.3353	-10.4574	stromal_cell
cell_10X_P8_15_CGTCACTTCAACGAAA	-25.1944	-4.19512	stromal_cell
cell_10X_P8_15_CGTCACTTCATGGTCA	-5.60967	-16.7103	stromal_cell
cell_10X_P8_15_CGTCACTTCGGTGTCG	-23.639	-11.3151	stromal_cell
cell_10X_P8_15_CGTCACTTCTACTCAT	1.11564	-3.57073	stromal_cell
cell_10X_P8_15_CGTCACTTCTCGCTTG	-12.5209	-6.59964	stromal_cell
cell_10X_P8_15_CGTCAGGAGCTTATCG	53.7341	-20.5288	stromal_cell
cell_10X_P8_15_CGTCAGGAGGGCTTGA	2.85304	-11.121	stromal_cell
cell_10X_P8_15_CGTCAGGCAATGGAGC	-6.09843	-22.994	stromal_cell
cell_10X_P8_15_CGTCAGGCATGCAATC	9.6312	-3.43003	stromal_cell
cell_10X_P8_15_CGTCAGGGTAAACGCG	-2.15049	-5.70948	stromal_cell
cell_10X_P8_15_CGTCAGGGTGCTAGCC	54.7587	-19.8114	epithelial_cell
cell_10X_P8_15_CGTCAGGGTTCGCGAC	10.1016	-2.30427	stromal_cell
cell_10X_P8_15_CGTCCATAGCAATATG	-1.59373	-7.74303	stromal_cell
cell_10X_P8_15_CGTCCATAGTTTCCTT	8.94568	-9.69167	stromal_cell
cell_10X_P8_15_CGTCCATCAGCGTCCA	49.0003	-16.0483	epithelial_cell
cell_10X_P8_15_CGTCCATCAGGATTGG	10.3525	-4.44844	stromal_cell
cell_10X_P8_15_CGTCCATGTAGAAGGA	7.02396	-49.6655	leukocyte
cell_10X_P8_15_CGTCCATGTGATGTGG	-14.5842	-4.94526	stromal_cell
cell_10X_P8_15_CGTCCATTCAGTTAGC	4.10116	2.16186	stromal_cell
cell_10X_P8_15_CGTCCATTCCAAACTG	12.6129	-37.6448	leukocyte
cell_10X_P8_15_CGTCCATTCTGTTTGT	-32.0611	-12.9164	stromal_cell
cell_10X_P8_15_CGTCTACCAGACAAGC	-2.33584	-4.0689	stromal_cell
cell_10X_P8_15_CGTCTACCAGGTGGAT	-15.9756	-19.0254	stromal_cell
cell_10X_P8_15_CGTCTACGTCATACTG	-21.1997	-21.6376	stromal_cell
cell_10X_P8_15_CGTCTACTCCGAAGAG	-37.7731	-13.4673	stromal_cell
cell_10X_P8_15_CGTCTACTCGCAGGCT	1.09477	-13.8995	stromal_cell
cell_10X_P8_15_CGTCTACTCGGTGTTA	-32.3883	-20.7211	stromal_cell
cell_10X_P8_15_CGTGAGCAGAGCAATT	17.9102	0.578902	endothelial_cell
cell_10X_P8_15_CGTGAGCAGATGTCGG	24.9832	-4.05995	endothelial_cell
cell_10X_P8_15_CGTGAGCAGCCCAGCT	3.60821	-9.19873	stromal_cell
cell_10X_P8_15_CGTGAGCCACCTATCC	5.21547	-10.8478	stromal_cell
cell_10X_P8_15_CGTGAGCCAGATCGGA	25.826	6.41482	endothelial_cell
cell_10X_P8_15_CGTGAGCGTCAGATAA	-2.76888	-17.8937	stromal_cell
cell_10X_P8_15_CGTGAGCGTCCGAAGA	-33.6448	-11.2707	stromal_cell
cell_10X_P8_15_CGTGAGCTCAAACCAC	43.0475	-14.8881	epithelial_cell
cell_10X_P8_15_CGTGTAAAGCTACCGC	-23.6467	-16.7584	stromal_cell
cell_10X_P8_15_CGTGTAAAGTATTGGA	9.67508	9.29888	neuroendocrine_cell
cell_10X_P8_15_CGTGTAAAGTTCCACA	12.806	-38.4152	leukocyte
cell_10X_P8_15_CGTGTAAAGTTCGCAT	24.1791	10.4716	endothelial_cell
cell_10X_P8_15_CGTGTAAGTGAAATCA	49.3815	-19.0293	epithelial_cell
cell_10X_P8_15_CGTGTAATCAATAAGG	-33.1115	-19.1321	stromal_cell
cell_10X_P8_15_CGTGTAATCATACGGT	46.9276	-17.699	epithelial_cell
cell_10X_P8_15_CGTGTAATCCCTAACC	23.5105	2.7306	endothelial_cell
cell_10X_P8_15_CGTGTAATCTCTTATG	-27.1093	-18.6798	stromal_cell
cell_10X_P8_15_CGTGTCTAGAGAGCTC	-16.1011	-19.0865	stromal_cell
cell_10X_P8_15_CGTGTCTAGAGCCCAA	-20.1571	-7.62169	stromal_cell
cell_10X_P8_15_CGTGTCTAGGCAGTCA	-19.7819	-12.6628	stromal_cell
cell_10X_P8_15_CGTGTCTGTAGCTAAA	4.024	-10.6029	stromal_cell
cell_10X_P8_15_CGTGTCTGTGATAAGT	-33.0964	-9.37043	stromal_cell
cell_10X_P8_15_CGTGTCTTCAATCTCT	-6.11688	-13.0388	stromal_cell
cell_10X_P8_15_CGTGTCTTCACCTTAT	9.63514	-8.49319	stromal_cell
cell_10X_P8_15_CGTGTCTTCACTGGGC	-12.4183	-14.7249	stromal_cell
cell_10X_P8_15_CGTGTCTTCGAACGGA	-2.19482	-17.2724	stromal_cell
cell_10X_P8_15_CGTTAGAAGTGGGTTG	-33.4199	-17.4957	stromal_cell
cell_10X_P8_15_CGTTAGACAACGATGG	10.42	-5.52066	stromal_cell
cell_10X_P8_15_CGTTAGACACGAAATA	-0.985782	-6.59854	stromal_cell
cell_10X_P8_15_CGTTAGACATACTACG	21.8263	-3.77785	endothelial_cell
cell_10X_P8_15_CGTTAGACATCCGCGA	-14.2985	-11.22	stromal_cell
cell_10X_P8_15_CGTTAGACATGCTGGC	-12.2306	-6.0655	stromal_cell
cell_10X_P8_15_CGTTAGAGTCATATGC	-31.7247	-3.73913	stromal_cell
cell_10X_P8_15_CGTTCTGAGCCAGTTT	-27.1033	-18.88	stromal_cell
cell_10X_P8_15_CGTTCTGCAGCTCGCA	1.37412	-10.6225	stromal_cell
cell_10X_P8_15_CGTTCTGCATCGATGT	-10.6818	-1.26449	stromal_cell
cell_10X_P8_15_CGTTCTGGTAACGCGA	2.02496	-8.25875	stromal_cell
cell_10X_P8_15_CGTTCTGTCACTCCTG	-14.2639	-3.41331	stromal_cell
cell_10X_P8_15_CGTTCTGTCTAGAGTC	-2.61517	-5.3899	stromal_cell
cell_10X_P8_15_CGTTGGGAGACTGGGT	-11.7386	-13.2858	stromal_cell
cell_10X_P8_15_CGTTGGGAGAGTGAGA	-15.2634	-10.5133	stromal_cell
[truncated: 52,248 more rows]
