# Supplementary material for: gCAnno: a graph-based single cell type annotation method
Source: BMC Genomics. 2020 Nov 23;21:823. doi: 10.1186/s12864-020-07223-4 (PMC7686723; doi:10.1186/s12864-020-07223-4)
Supplement: Supplementary file 8 — Additional file 8: Table S3. The tSNE result, cell barcodes and cell type labels of (a) mCel-seq2 liver, (b) 10x liver, (c) Drop-seq pancreas and (d) Smart-seq2 pancreas. [file 12864_2020_7223_MOESM8_ESM.xlsx]

## Sheet: mCel-seq2 liver
tSNE result of mCel-seq2 liver dataset
	TSNE1	TSNE2	cluster
ASGR1_CD45_UNB_P4_5_16	13.9847	1.73106	T_NK
ASGR1_CD45_UNB_P4_5_19	50.7004	-15.4989	T_NK
ASGR1_CD45_UNB_P4_5_27	45.1815	-2.61601	T_NK
ASGR1_CD45_UNB_P4_5_30	-52.9007	-40.8636	Cholangiocytes
ASGR1_CD45_UNB_P4_5_35	71.8919	-8.16186	T_NK
ASGR1_CD45_UNB_P4_5_50	59.7876	-14.5822	Macrophage
ASGR1_CD45_UNB_P4_5_51	52.7908	19.4801	T_NK
ASGR1_CD45_UNB_P4_5_54	62.0164	-7.93022	T_NK
ASGR1_CD45_UNB_P4_5_55	41.4895	6.24091	T_NK
ASGR1_CD45_UNB_P4_5_59	51.0354	-38.9445	T_NK
ASGR1_CD45_UNB_P4_5_61	-50.8567	-41.8318	Cholangiocytes
ASGR1_CD45_UNB_P4_5_64	69.915	-12.8592	T_NK
ASGR1_CD45_UNB_P4_5_65	54.4776	-9.04132	T_NK
ASGR1_CD45_UNB_P4_5_69	63.5434	-23.5443	T_NK
ASGR1_CD45_UNB_P4_5_70	53.4662	-20.3552	T_NK
ASGR1_CD45_UNB_P4_5_83	53.8306	-46.3508	T_NK
ASGR1_CD45_UNB_P4_5_91	38.2009	21.3218	T_NK
ASGR1_CD45_UNB_P4_5_94	63.2221	-6.16006	T_NK
ASGR1_CD45_UNB_P4_6_106	8.35202	-47.2678	Macrophage
ASGR1_CD45_UNB_P4_6_116	-48.1068	-18.4253	Cholangiocytes
ASGR1_CD45_UNB_P4_6_131	48.1238	-19.1772	T_NK
ASGR1_CD45_UNB_P4_6_135	56.505	13.3183	T_NK
ASGR1_CD45_UNB_P4_6_140	67.2877	-34.4374	T_NK
ASGR1_CD45_UNB_P4_6_163	61.0998	17.2349	T_NK
ASGR1_CD45_UNB_P4_6_169	48.015	-6.64866	T_NK
ASGR1_CD45_UNB_P4_6_171	-47.7139	-16.7911	Cholangiocytes
ASGR1_CD45_UNB_P4_6_181	4.60277	-36.6254	Macrophage
ASGR1_CD45_UNB_P4_6_190	47.1791	12.5738	T_NK
ASGR1_CD45_UNB_P4_7_4	35.7544	-53.0616	T_NK
ASGR1_CD45_UNB_P4_7_7	61.2706	-40.9258	T_NK
ASGR1_CD45_UNB_P4_7_14	-52.2733	-42.8574	Cholangiocytes
ASGR1_CD45_UNB_P4_7_16	42.6352	-38.4938	T_NK
ASGR1_CD45_UNB_P4_7_24	50.5822	-23.8286	T_NK
ASGR1_CD45_UNB_P4_7_34	41.8144	12.6215	T_NK
ASGR1_CD45_UNB_P4_7_37	64.3512	-29.4486	T_NK
ASGR1_CD45_UNB_P4_7_40	62.603	-40.7056	Macrophage
ASGR1_CD45_UNB_P4_7_41	44.7611	-37.6307	T_NK
ASGR1_CD45_UNB_P4_7_47	28.2936	13.332	T_NK
ASGR1_CD45_UNB_P4_7_50	47.1638	12.5071	T_NK
ASGR1_CD45_UNB_P4_7_57	-7.17606	-72.7466	T_NK
ASGR1_CD45_UNB_P4_7_59	46.6012	-30.0213	T_NK
ASGR1_CD45_UNB_P4_7_61	15.5246	27.2436	Cholangiocytes
ASGR1_CD45_UNB_P4_7_73	55.2585	-31.4022	T_NK
ASGR1_CD45_UNB_P4_7_75	67.1362	-21.4787	T_NK
ASGR1_CD45_UNB_P4_7_78	36.7471	-52.0487	T_NK
ASGR1_CD45_UNB_P4_7_104	21.4794	21.9331	T_NK
ASGR1_CD45_UNB_P4_7_136	22.899	18.8635	T_NK
ASGR1_CD45_UNB_P4_7_137	22.9481	18.6698	T_NK
ASGR1_CD45_UNB_P4_7_167	-6.08874	-75.1923	B_cells
ASGR1_CD45_UNB_P4_7_169	42.5892	13.3415	T_NK
ASGR1_CD45_UNB_P4_7_174	23.0412	26.8092	T_NK
ASGR1_CD45_UNB_P4_7_175	30.5903	14.7422	T_NK
ASGR1_CD45_UNB_P4_8_103	19.5722	3.97513	Macrophage
ASGR1_CD45_UNB_P4_8_104	33.9675	-23.0525	T_NK
ASGR1_CD45_UNB_P4_8_105	25.184	25.3697	T_NK
ASGR1_CD45_UNB_P4_8_108	68.4376	-1.67908	T_NK
ASGR1_CD45_UNB_P4_8_120	55.4488	3.86077	T_NK
ASGR1_CD45_UNB_P4_8_121	49.9121	21.8627	T_NK
ASGR1_CD45_UNB_P4_8_127	52.538	-3.2682	T_NK
ASGR1_CD45_UNB_P4_8_136	66.8894	-29.5891	T_NK
ASGR1_CD45_UNB_P4_8_137	58.7306	-33.8546	T_NK
ASGR1_CD45_UNB_P4_8_138	53.1773	27.5411	T_NK
ASGR1_CD45_UNB_P4_8_144	-74.0573	16.595	Hepatocytes
ASGR1_CD45_UNB_P4_8_169	64.3419	-39.2399	T_NK
ASGR1_CD45_UNB_P4_8_171	55.1009	18.5408	T_NK
ASGR1_CD45_UNB_P4_8_173	-42.0694	-9.61307	Hepatocytes
ASGR1_CD45_UNB_P4_8_174	73.1772	-8.49858	T_NK
ASGR1_CD45_UNB_P4_8_175	53.4193	-26.336	T_NK
ASGR1pos304_5_5	-16.4731	-53.7902	T_NK
ASGR1pos304_5_6	-79.3716	-3.38466	Hepatocytes
ASGR1pos304_5_7	-76.5022	-1.31085	Hepatocytes
ASGR1pos304_5_8	-57.6818	36.888	Hepatocytes
ASGR1pos304_5_10	26.9683	-44.7738	T_NK
ASGR1pos304_5_11	-71.625	-5.3144	Hepatocytes
ASGR1pos304_5_18	-76.7776	-6.68495	Hepatocytes
ASGR1pos304_5_20	-6.42681	-72.3724	Hepatocytes
ASGR1pos304_5_24	38.2215	-53.7338	T_NK
ASGR1pos304_5_28	-75.5874	-4.16629	Hepatocytes
ASGR1pos304_5_30	29.5837	-45.9634	T_NK
ASGR1pos304_5_36	-59.0622	22.8321	Hepatocytes
ASGR1pos304_5_38	28.0928	-57.3201	T_NK
ASGR1pos304_5_39	-80.0782	-1.36682	Hepatocytes
ASGR1pos304_5_44	21.0117	-64.8912	T_NK
ASGR1pos304_5_52	-73.9917	-2.98731	Hepatocytes
ASGR1pos304_5_53	38.2751	-53.6938	T_NK
ASGR1pos304_5_55	-26.3597	44.7832	Hepatocytes
ASGR1pos304_5_56	-77.0785	-1.85795	Hepatocytes
ASGR1pos304_5_61	-79.1119	-2.84438	Hepatocytes
ASGR1pos304_5_67	29.2148	-56.4719	T_NK
ASGR1pos304_5_69	31.823	-44.7436	T_NK
ASGR1pos304_5_78	-74.7535	-6.40261	Hepatocytes
ASGR1pos304_5_81	30.3029	-57.7967	T_NK
ASGR1pos304_5_87	31.781	-56.7918	T_NK
ASGR1pos304_5_89	-58.4985	24.5745	Hepatocytes
ASGR1pos304_5_90	34.0254	-57.8678	T_NK
ASGR1pos304_6_98	34.0037	-58.0287	T_NK
ASGR1pos304_6_105	-23.1298	-35.1127	T_NK
ASGR1pos304_6_106	-78.3523	-3.68956	Hepatocytes
ASGR1pos304_6_108	-9.8708	-75.4792	Hepatocytes
ASGR1pos304_6_110	32.8509	-43.1392	T_NK
ASGR1pos304_6_114	-76.3475	-5.97885	Hepatocytes
ASGR1pos304_6_115	-77.2559	-6.84409	Hepatocytes
ASGR1pos304_6_118	36.1249	-54.007	T_NK
ASGR1pos304_6_119	38.7581	-53.6583	T_NK
ASGR1pos304_6_122	31.0865	-44.7082	T_NK
ASGR1pos304_6_125	-74.2789	-5.92626	Hepatocytes
ASGR1pos304_6_127	-76.1059	-0.902135	Hepatocytes
ASGR1pos304_6_131	-61.0327	22.8596	Hepatocytes
ASGR1pos304_6_134	45.8817	-41.4694	T_NK
ASGR1pos304_6_135	31.589	-7.93068	T_NK
ASGR1pos304_6_136	-79.9903	-4.6257	Hepatocytes
ASGR1pos304_6_137	-75.496	-2.82334	Hepatocytes
ASGR1pos304_6_140	39.2529	-33.5431	T_NK
ASGR1pos304_6_142	43.257	-37.9821	T_NK
ASGR1pos304_6_143	-76.6608	-4.03137	Hepatocytes
ASGR1pos304_6_146	22.1177	-13.9873	T_NK
ASGR1pos304_6_150	-69.8716	-5.78409	Hepatocytes
ASGR1pos304_6_152	28.6541	-51.5677	T_NK
ASGR1pos304_6_154	-7.81527	-70.0388	Hepatocytes
ASGR1pos304_6_156	37.9393	-26.3392	T_NK
ASGR1pos304_6_161	-62.8321	21.1939	Hepatocytes
ASGR1pos304_6_163	-74.431	0.995766	Hepatocytes
ASGR1pos304_6_164	34.0942	-43.633	T_NK
ASGR1pos304_6_170	9.79481	-6.71933	T_NK
ASGR1pos304_6_172	-78.9526	-2.24687	Hepatocytes
ASGR1pos304_6_176	31.9776	-56.1417	T_NK
ASGR1pos304_6_178	33.4786	-42.0513	T_NK
ASGR1pos304_6_181	60.9454	-49.7174	T_NK
ASGR1pos304_6_182	-78.436	11.7165	Hepatocytes
ASGR1pos304_6_187	32.8998	-16.5231	T_NK
ASGR1pos304_6_188	-80.2518	-1.162	Hepatocytes
ASGR1pos304_6_189	30.3722	-21.5558	T_NK
ASGR1pos304_6_190	-76.0717	10.822	Hepatocytes
ASGR1pos304_7_2	32.2937	-44.1609	T_NK
ASGR1pos304_7_3	49.9221	-39.6967	T_NK
ASGR1pos304_7_4	28.7564	-57.6631	T_NK
ASGR1pos304_7_6	-59.0676	22.8621	Hepatocytes
ASGR1pos304_7_7	-73.8656	-3.76491	Hepatocytes
ASGR1pos304_7_10	29.0096	-52.9084	T_NK
ASGR1pos304_7_11	30.1566	-57.8329	T_NK
ASGR1pos304_7_13	-78.2681	-2.37182	Hepatocytes
ASGR1pos304_7_20	-7.43814	-74.984	Hepatocytes
ASGR1pos304_7_22	-74.8134	1.18439	Hepatocytes
ASGR1pos304_7_24	-76.5117	-4.34573	Hepatocytes
ASGR1pos304_7_28	51.411	-50.0557	T_NK
ASGR1pos304_7_30	-80.0162	-8.8065	Hepatocytes
ASGR1pos304_7_32	-70.9361	-5.29468	Hepatocytes
ASGR1pos304_7_33	4.89535	-13.5157	T_NK
ASGR1pos304_7_35	26.3419	-32.4785	T_NK
ASGR1pos304_7_38	-72.4909	-3.76744	Hepatocytes
ASGR1pos304_7_39	29.1575	-56.8596	T_NK
ASGR1pos304_7_42	15.3618	-4.57676	T_NK
ASGR1pos304_7_43	-73.5767	-6.69709	Hepatocytes
ASGR1pos304_7_44	20.9249	-64.8946	T_NK
ASGR1pos304_7_49	25.6168	-52.444	T_NK
ASGR1pos304_7_53	-75.3555	-3.56939	Hepatocytes
ASGR1pos304_7_55	-71.7552	-4.43329	Hepatocytes
ASGR1pos304_7_64	30.2817	-45.457	T_NK
ASGR1pos304_7_68	44.7009	-45.5504	T_NK
ASGR1pos304_7_70	-78.616	10.6609	Hepatocytes
ASGR1pos304_7_74	59.0754	-44.4889	T_NK
ASGR1pos304_7_75	-72.7656	4.14066	Hepatocytes
ASGR1pos304_7_78	-77.5424	-3.80406	Hepatocytes
ASGR1pos304_7_81	-73.5277	-6.92209	Hepatocytes
ASGR1pos304_7_83	60.596	-46.7371	T_NK
ASGR1pos304_7_84	18.9264	22.656	T_NK
ASGR1pos304_7_89	-10.6132	-44.5605	Macrophage
ASGR1pos304_7_93	-76.9389	-3.37821	Hepatocytes
ASGR1pos304_7_94	-74.8377	-3.77478	Hepatocytes
ASGR1pos304_7_95	29.967	-57.5544	T_NK
ASGR1pos304_7_96	31.4929	-58.3417	T_NK
ASGR1pos304_8_101	-79.2268	-5.79567	Hepatocytes
ASGR1pos304_8_103	-72.2471	-5.47704	Hepatocytes
ASGR1pos304_8_105	-16.686	-53.7253	T_NK
ASGR1pos304_8_108	-8.0954	-74.759	Hepatocytes
ASGR1pos304_8_110	-73.247	20.5234	Hepatocytes
ASGR1pos304_8_114	-72.6408	-4.11409	Hepatocytes
ASGR1pos304_8_123	57.8864	-49.9132	T_NK
ASGR1pos304_8_127	-77.8923	-3.41077	Hepatocytes
ASGR1pos304_8_129	-78.1784	-4.00969	Hepatocytes
ASGR1pos304_8_135	39.1539	-33.4397	T_NK
ASGR1pos304_8_137	0.767069	-11.8349	T_NK
ASGR1pos304_8_141	29.4947	-47.7377	T_NK
ASGR1pos304_8_146	-76.1531	-4.94415	Hepatocytes
ASGR1pos304_8_153	-78.5209	10.6654	Hepatocytes
ASGR1pos304_8_155	-73.8972	-0.332475	Hepatocytes
ASGR1pos304_8_165	36.0257	-51.5593	T_NK
ASGR1pos304_8_173	-78.6315	-3.03711	Hepatocytes
ASGR1pos304_8_177	-71.8463	-2.96473	Hepatocytes
ASGR1pos304_8_180	28.2096	-43.0461	T_NK
ASGR1pos304_8_181	54.1031	7.52372	T_NK
ASGR1pos304_8_183	-76.751	-4.57319	Hepatocytes
ASGR1pos304_8_185	-5.03158	-0.0591329	T_NK
ASGR1pos304_8_186	15.8897	-7.01044	Hepatocytes
ASGR1pos304_8_188	-80.0077	-8.79293	Hepatocytes
ASGR1pos308_10_98	41.2054	-54.1085	T_NK
ASGR1pos308_10_99	17.4361	34.5045	Hepatocytes
ASGR1pos308_10_101	-59.2641	12.5367	Hepatocytes
ASGR1pos308_10_103	-48.197	19.1142	Hepatocytes
ASGR1pos308_10_104	-60.1065	4.04057	Hepatocytes
ASGR1pos308_10_105	8.174	20.8447	Hepatocytes
ASGR1pos308_10_106	-59.603	3.43791	Hepatocytes
ASGR1pos308_10_107	-63.6335	-0.225826	Hepatocytes
ASGR1pos308_10_108	-9.87668	-75.6322	Hepatocytes
ASGR1pos308_10_112	-47.5206	19.7101	Hepatocytes
ASGR1pos308_10_113	28.8051	-59.0945	Hepatocytes
ASGR1pos308_10_114	-46.7191	22.3454	Hepatocytes
ASGR1pos308_10_115	-44.1698	23.8813	Hepatocytes
ASGR1pos308_10_116	-59.4272	10.3367	Hepatocytes
ASGR1pos308_10_119	-15.206	-9.72403	Hepatocytes
ASGR1pos308_10_120	-59.4401	6.98726	Hepatocytes
ASGR1pos308_10_121	-59.7754	4.3776	Hepatocytes
ASGR1pos308_10_122	-57.5411	7.33462	Hepatocytes
ASGR1pos308_10_125	37.338	-36.4081	Hepatocytes
ASGR1pos308_10_126	41.4558	-54.5787	T_NK
ASGR1pos308_10_127	-50.8369	19.1434	Hepatocytes
ASGR1pos308_10_128	-50.4683	19.1329	Hepatocytes
ASGR1pos308_10_129	37.2946	-36.2597	Hepatocytes
ASGR1pos308_10_130	-37.3628	-3.30596	Hepatocytes
ASGR1pos308_10_132	-63.7897	6.2272	Hepatocytes
ASGR1pos308_10_135	-55.7366	11.7961	Hepatocytes
ASGR1pos308_10_136	-56.1288	14.2105	Hepatocytes
ASGR1pos308_10_137	-44.4113	23.6482	Hepatocytes
ASGR1pos308_10_138	-58.2267	6.26746	Hepatocytes
ASGR1pos308_10_139	-59.2464	12.5554	Hepatocytes
ASGR1pos308_10_140	-54.7917	12.651	Hepatocytes
ASGR1pos308_10_141	-7.33408	49.219	Hepatocytes
ASGR1pos308_10_145	-8.20378	-72.6346	Hepatocytes
ASGR1pos308_10_146	-59.6126	1.22318	Hepatocytes
ASGR1pos308_10_151	-53.3232	12.2814	Hepatocytes
ASGR1pos308_10_152	-59.2515	8.44081	Hepatocytes
ASGR1pos308_10_153	-47.4415	18.515	Hepatocytes
ASGR1pos308_10_155	-66.8231	-2.58937	Hepatocytes
ASGR1pos308_10_157	41.9995	-52.4613	Hepatocytes
ASGR1pos308_10_158	-58.4826	6.70253	Hepatocytes
ASGR1pos308_10_159	-61.4268	0.109003	Hepatocytes
ASGR1pos308_10_161	-54.6692	13.5875	Hepatocytes
ASGR1pos308_10_163	-55.0407	11.7254	Hepatocytes
ASGR1pos308_10_164	-55.4848	15.4584	Hepatocytes
ASGR1pos308_10_165	-59.4291	5.25314	Hepatocytes
ASGR1pos308_10_169	-26.3307	-29.7527	Hepatocytes
ASGR1pos308_10_173	-59.9593	6.0679	Hepatocytes
ASGR1pos308_10_175	-58.9558	6.5995	Hepatocytes
ASGR1pos308_10_176	-61.7763	6.15307	Hepatocytes
ASGR1pos308_10_177	29.3631	-59.4673	Hepatocytes
ASGR1pos308_10_180	-58.5809	5.67856	Hepatocytes
ASGR1pos308_10_181	-47.9729	18.9367	Hepatocytes
ASGR1pos308_10_184	-48.4324	19.9388	Hepatocytes
ASGR1pos308_10_186	-45.1231	23.0075	Hepatocytes
ASGR1pos308_10_187	-60.7126	3.11105	Hepatocytes
ASGR1pos308_10_189	-61.1683	6.90067	Hepatocytes
ASGR1pos308_10_190	-49.9031	21.657	Hepatocytes
ASGR1pos308_10_191	-57.8992	4.96005	Hepatocytes
ASGR1pos308_10_192	37.3127	-36.6144	Hepatocytes
ASGR1pos308_11_1	-52.3967	12.3554	Hepatocytes
ASGR1pos308_11_3	-60.16	5.37181	Hepatocytes
ASGR1pos308_11_6	-47.432	18.3313	Hepatocytes
ASGR1pos308_11_7	-63.2218	3.69131	Hepatocytes
ASGR1pos308_11_13	20.2635	23.1455	Hepatocytes
ASGR1pos308_11_15	-59.6341	8.92759	Hepatocytes
ASGR1pos308_11_16	28.0626	-43.2208	T_NK
ASGR1pos308_11_17	33.6844	-44.0391	T_NK
ASGR1pos308_11_18	-55.9916	17.0756	Hepatocytes
ASGR1pos308_11_20	-10.2474	-75.843	Hepatocytes
ASGR1pos308_11_21	-50.7762	19.0272	Hepatocytes
ASGR1pos308_11_22	-27.471	-48.1248	Hepatocytes
ASGR1pos308_11_29	-55.6356	17.4976	Hepatocytes
ASGR1pos308_11_30	-31.2908	-49.2145	Hepatocytes
ASGR1pos308_11_32	-54.849	14.2326	Hepatocytes
ASGR1pos308_11_33	-57.7021	9.22069	Hepatocytes
ASGR1pos308_11_35	51.0062	-6.74221	T_NK
ASGR1pos308_11_38	-55.513	16.0833	Hepatocytes
ASGR1pos308_11_39	-58.6951	4.83491	Hepatocytes
ASGR1pos308_11_40	-64.0671	2.15806	Hepatocytes
ASGR1pos308_11_41	-4.52232	0.160125	T_NK
ASGR1pos308_11_42	51.5585	-6.88192	T_NK
ASGR1pos308_11_45	-47.3613	21.7355	Hepatocytes
ASGR1pos308_11_48	-60.8553	6.98108	Hepatocytes
ASGR1pos308_11_51	-10.4437	-70.8685	Hepatocytes
ASGR1pos308_11_52	37.6645	-51.2843	T_NK
ASGR1pos308_11_55	-60.8143	4.26791	Hepatocytes
ASGR1pos308_11_56	-51.5119	18.3368	Hepatocytes
ASGR1pos308_11_57	-64.9475	-2.35882	Hepatocytes
ASGR1pos308_11_59	-64.0858	0.946572	Hepatocytes
ASGR1pos308_11_63	-51.0189	16.8462	Hepatocytes
ASGR1pos308_11_65	-55.7619	14.8066	Hepatocytes
ASGR1pos308_11_69	-27.6901	-47.8698	Hepatocytes
ASGR1pos308_11_72	-51.7118	18.5472	Hepatocytes
ASGR1pos308_11_74	-55.8489	16.7248	Hepatocytes
ASGR1pos308_11_78	-63.3738	1.94859	Hepatocytes
ASGR1pos308_11_80	-64.2037	1.96067	Hepatocytes
ASGR1pos308_11_86	-57.3038	5.59805	Hepatocytes
ASGR1pos308_11_91	-64.2701	5.77408	Hepatocytes
ASGR1pos308_11_92	37.2347	-40.4173	T_NK
ASGR1pos308_11_94	45.6657	14.6322	T_NK
ASGR1pos308_12_97	-46.9101	22.0385	Hepatocytes
ASGR1pos308_12_98	-60.8561	7.98507	Hepatocytes
ASGR1pos308_12_99	-63.1133	1.40345	Hepatocytes
ASGR1pos308_12_101	-10.2848	-70.849	Hepatocytes
ASGR1pos308_12_102	-49.6963	21.3152	Hepatocytes
ASGR1pos308_12_103	42.0651	-52.7818	T_NK
ASGR1pos308_12_104	-54.3188	13.6753	Hepatocytes
ASGR1pos308_12_106	28.685	-58.8441	Hepatocytes
ASGR1pos308_12_108	-10.1154	-75.7548	Hepatocytes
ASGR1pos308_12_109	-45.243	23.4687	Hepatocytes
ASGR1pos308_12_111	-49.8348	19.2237	Hepatocytes
ASGR1pos308_12_113	-48.6953	18.0543	Hepatocytes
ASGR1pos308_12_115	-60.4268	-0.222475	Hepatocytes
ASGR1pos308_12_116	42.0387	-52.6162	T_NK
ASGR1pos308_12_117	37.2795	-36.3244	Hepatocytes
ASGR1pos308_12_122	-46.8808	22.0977	Hepatocytes
ASGR1pos308_12_123	-62.2528	2.52446	Hepatocytes
ASGR1pos308_12_124	-48.9225	19.1054	Hepatocytes
ASGR1pos308_12_127	-62.4983	-0.480723	Hepatocytes
ASGR1pos308_12_132	-62.0728	1.97733	Hepatocytes
ASGR1pos308_12_136	-61.6222	0.617861	Hepatocytes
ASGR1pos308_12_137	-51.9412	11.8811	Hepatocytes
ASGR1pos308_12_138	-52.8107	12.9598	Hepatocytes
ASGR1pos308_12_139	-10.1889	-71.1151	Hepatocytes
ASGR1pos308_12_140	-48.6721	19.6977	Hepatocytes
ASGR1pos308_12_142	-61.2258	-0.554002	Hepatocytes
ASGR1pos308_12_154	-45.8078	21.4269	Hepatocytes
ASGR1pos308_12_158	-54.6835	14.4785	Hepatocytes
ASGR1pos308_12_159	-27.4761	-42.2312	Hepatocytes
ASGR1pos308_12_162	-42.0071	39.4206	Hepatocytes
ASGR1pos308_12_164	17.4433	34.5612	Hepatocytes
ASGR1pos308_12_167	17.3993	34.8753	Hepatocytes
ASGR1pos308_12_168	-63.9939	-2.04612	Hepatocytes
ASGR1pos308_12_170	-49.1906	20.6528	Hepatocytes
ASGR1pos308_12_171	-61.6145	3.86685	Hepatocytes
ASGR1pos308_12_174	-57.1772	5.79785	Hepatocytes
ASGR1pos308_12_175	-50.8826	16.6897	Hepatocytes
ASGR1pos308_12_178	28.8153	-59.0834	T_NK
ASGR1pos308_12_179	-50.6475	16.3452	Hepatocytes
ASGR1pos308_12_180	-48.9152	18.9878	Hepatocytes
ASGR1pos308_12_183	-56.6846	2.45438	Hepatocytes
ASGR1pos308_12_185	15.5419	-7.66709	Hepatocytes
ASGR1pos308_12_186	-54.7085	16.97	Hepatocytes
ASGR1pos308_12_189	-49.3935	19.466	Hepatocytes
ASGR1pos308_9_1	32.8481	31.5648	Hepatocytes
ASGR1pos308_9_3	-64.1244	-2.03797	Hepatocytes
ASGR1pos308_9_4	-45.1718	23.3027	Hepatocytes
ASGR1pos308_9_5	33.2144	-49.7133	Hepatocytes
ASGR1pos308_9_6	-49.4311	20.1423	Hepatocytes
ASGR1pos308_9_8	-54.6659	17.5233	Hepatocytes
ASGR1pos308_9_11	-57.2747	9.49044	Hepatocytes
ASGR1pos308_9_14	-59.0666	7.3041	Hepatocytes
ASGR1pos308_9_15	-53.4263	15.9508	Hepatocytes
ASGR1pos308_9_18	-61.1959	6.53837	Hepatocytes
ASGR1pos308_9_19	-61.9817	4.59465	Hepatocytes
ASGR1pos308_9_20	-9.32484	-72.4214	Hepatocytes
ASGR1pos308_9_23	-44.9172	23.3735	Hepatocytes
ASGR1pos308_9_24	-63.465	1.22535	Hepatocytes
ASGR1pos308_9_25	-61.52	3.7626	Hepatocytes
ASGR1pos308_9_29	-64.133	2.01534	Hepatocytes
ASGR1pos308_9_30	-55.1324	14.9631	Hepatocytes
ASGR1pos308_9_31	-45.3137	23.6246	Hepatocytes
ASGR1pos308_9_32	-58.1352	8.3224	Hepatocytes
ASGR1pos308_9_33	-61.6543	5.21352	Hepatocytes
ASGR1pos308_9_34	-45.0495	23.7454	Hepatocytes
ASGR1pos308_9_36	-55.1051	14.1158	Hepatocytes
ASGR1pos308_9_37	41.3979	-54.389	T_NK
ASGR1pos308_9_38	-65.4677	9.28373	Hepatocytes
ASGR1pos308_9_39	-50.5189	18.2046	Hepatocytes
ASGR1pos308_9_40	-49.6346	20.9806	Hepatocytes
ASGR1pos308_9_41	-62.2311	-0.762789	Hepatocytes
ASGR1pos308_9_44	26.2255	38.5269	Hepatocytes
ASGR1pos308_9_48	-61.7416	6.95738	Hepatocytes
ASGR1pos308_9_49	-55.5466	16.9028	Hepatocytes
ASGR1pos308_9_52	-61.5436	7.50897	Hepatocytes
ASGR1pos308_9_55	-46.1838	22.949	Hepatocytes
ASGR1pos308_9_56	-65.5056	5.88313	Hepatocytes
ASGR1pos308_9_57	-44.5169	23.7128	Hepatocytes
ASGR1pos308_9_58	-51.3018	18.7469	Hepatocytes
ASGR1pos308_9_59	-58.8136	5.04665	Hepatocytes
ASGR1pos308_9_60	-37.1898	-2.98506	Hepatocytes
ASGR1pos308_9_61	-48.0831	21.2737	Hepatocytes
ASGR1pos308_9_62	16.145	-7.18145	Hepatocytes
ASGR1pos308_9_63	-53.5235	10.2246	Hepatocytes
ASGR1pos308_9_65	-64.0491	2.097	Hepatocytes
ASGR1pos308_9_66	51.3151	-5.84593	Hepatocytes
ASGR1pos308_9_67	-27.5528	-49.8295	Hepatocytes
ASGR1pos308_9_69	-53.2013	15.55	Hepatocytes
ASGR1pos308_9_70	-58.3264	8.2324	Hepatocytes
ASGR1pos308_9_73	-59.5321	7.95045	Hepatocytes
ASGR1pos308_9_75	-52.149	11.8635	Hepatocytes
ASGR1pos308_9_78	33.5991	-49.6967	T_NK
ASGR1pos308_9_80	-64.6385	6.49739	Hepatocytes
ASGR1pos308_9_81	-60.6421	-0.120418	Hepatocytes
ASGR1pos308_9_86	-20.7623	-20.8189	Hepatocytes
ASGR1pos308_9_88	60.0749	-49.881	Hepatocytes
ASGR1pos308_9_89	-63.9529	1.64512	Hepatocytes
ASGR1pos308_9_90	-50.4534	16.3001	Hepatocytes
ASGR1pos308_9_91	-57.7234	9.25861	Hepatocytes
ASGR1pos308_9_93	-60.6122	-0.794781	Hepatocytes
ASGR1pos308_9_94	-28.1989	-48.9716	Hepatocytes
ASGR1pos310_5_2	-72.365	13.2594	Hepatocytes
ASGR1pos310_5_5	-66.8614	5.72734	Hepatocytes
ASGR1pos310_5_6	-65.8255	28.7247	Hepatocytes
ASGR1pos310_5_7	-64.1787	30.5511	Hepatocytes
ASGR1pos310_5_9	-62.8215	24.2058	Hepatocytes
ASGR1pos310_5_10	-61.8223	33.1372	Hepatocytes
ASGR1pos310_5_11	-34.4551	51.5953	Hepatocytes
ASGR1pos310_5_12	-59.3187	25.3649	Hepatocytes
ASGR1pos310_5_13	-65.2475	30.0004	Hepatocytes
ASGR1pos310_5_15	-66.3659	-3.33505	Hepatocytes
ASGR1pos310_5_18	-45.9002	43.538	Hepatocytes
ASGR1pos310_5_21	-52.2099	8.89069	Hepatocytes
ASGR1pos310_5_23	-66.5325	28.6251	Hepatocytes
ASGR1pos310_5_27	-28.4545	55.7325	Hepatocytes
ASGR1pos310_5_29	-47.4757	39.921	Hepatocytes
ASGR1pos310_5_30	-74.1453	7.79965	Hepatocytes
ASGR1pos310_5_31	-25.6828	62.7285	Hepatocytes
ASGR1pos310_5_34	-70.0392	8.4287	Hepatocytes
ASGR1pos310_5_35	-56.9626	36.4454	Hepatocytes
ASGR1pos310_5_36	-65.3061	-2.95139	Hepatocytes
ASGR1pos310_5_37	-36.6911	50.7182	Hepatocytes
ASGR1pos310_5_39	-69.2612	8.89838	Hepatocytes
ASGR1pos310_5_40	-64.096	29.9244	Hepatocytes
ASGR1pos310_5_42	-63.6928	30.3475	Hepatocytes
ASGR1pos310_5_44	-61.4337	33.1313	Hepatocytes
ASGR1pos310_5_45	-48.1828	40.248	Hepatocytes
ASGR1pos310_5_47	-67.2034	21.2524	Hepatocytes
ASGR1pos310_5_48	-70.5708	25.7253	Hepatocytes
ASGR1pos310_5_52	-33.4541	51.0086	Hepatocytes
ASGR1pos310_5_53	-66.0957	30.689	Hepatocytes
ASGR1pos310_5_54	-71.7132	17.7673	Hepatocytes
ASGR1pos310_5_56	-43.0298	45.3237	Hepatocytes
ASGR1pos310_5_57	-0.146366	73.5792	Hepatocytes
ASGR1pos310_5_58	-74.8597	18.2124	Hepatocytes
ASGR1pos310_5_59	-25.8354	62.4703	Hepatocytes
ASGR1pos310_5_60	-66.8946	21.1986	Hepatocytes
ASGR1pos310_5_61	-29.2525	56.4833	Hepatocytes
ASGR1pos310_5_63	-65.0697	23.8047	Hepatocytes
ASGR1pos310_5_64	-54.1802	27.3113	Hepatocytes
ASGR1pos310_5_67	-41.7097	45.81	Hepatocytes
ASGR1pos310_5_68	-46.7931	40.616	Hepatocytes
ASGR1pos310_5_70	-63.6464	30.9856	Hepatocytes
ASGR1pos310_5_73	-40.7194	45.8253	Hepatocytes
ASGR1pos310_5_74	-35.8237	49.8638	Hepatocytes
ASGR1pos310_5_76	-42.7036	41.1653	Hepatocytes
ASGR1pos310_5_77	-25.9964	62.2086	Hepatocytes
ASGR1pos310_5_78	-63.7339	23.4696	Hepatocytes
ASGR1pos310_5_79	-55.0738	18.7859	Hepatocytes
ASGR1pos310_5_84	-44.0788	39.0419	Hepatocytes
ASGR1pos310_5_85	-77.8347	-6.79591	Hepatocytes
ASGR1pos310_5_86	-71.1145	24.7992	Hepatocytes
ASGR1pos310_5_87	-45.2084	38.6244	Hepatocytes
ASGR1pos310_5_90	-37.7887	51.0518	Hepatocytes
ASGR1pos310_5_91	-65.2283	26.4535	Hepatocytes
ASGR1pos310_5_94	-51.5002	40.0636	Hepatocytes
ASGR1pos310_5_95	-43.5234	45.0601	Hepatocytes
ASGR1pos310_5_96	-67.6152	30.5473	Hepatocytes
ASGR1pos310_6_97	-63.4139	21.9837	Hepatocytes
ASGR1pos310_6_98	-35.2239	49.9938	Hepatocytes
ASGR1pos310_6_99	-36.5738	50.9322	Hepatocytes
ASGR1pos310_6_101	-70.7107	21.774	Hepatocytes
ASGR1pos310_6_102	-50.1927	38.5223	Hepatocytes
ASGR1pos310_6_104	-27.6856	61.6371	Hepatocytes
ASGR1pos310_6_107	-51.0363	40.3823	Hepatocytes
ASGR1pos310_6_108	-69.3524	12.7683	Hepatocytes
ASGR1pos310_6_109	-36.5609	49.503	Hepatocytes
ASGR1pos310_6_110	-41.823	41.0324	Hepatocytes
ASGR1pos310_6_112	-69.7278	27.4017	Hepatocytes
ASGR1pos310_6_113	-72.8894	5.19401	Hepatocytes
ASGR1pos310_6_114	-55.0121	19.0388	Hepatocytes
ASGR1pos310_6_117	-43.4787	45.3075	Hepatocytes
ASGR1pos310_6_118	-51.5742	35.079	Hepatocytes
ASGR1pos310_6_119	-63.9792	24.4855	Hepatocytes
ASGR1pos310_6_120	-63.0576	22.1434	Hepatocytes
ASGR1pos310_6_124	-67.2378	26.9788	Hepatocytes
ASGR1pos310_6_127	-28.4543	55.6719	Hepatocytes
ASGR1pos310_6_129	-56.968	34.3124	Hepatocytes
ASGR1pos310_6_130	-29.7325	56.3501	Hepatocytes
ASGR1pos310_6_131	-39.9664	47.3182	Hepatocytes
ASGR1pos310_6_135	-53.8634	40.5519	Hepatocytes
ASGR1pos310_6_138	-39.7986	47.8776	Hepatocytes
ASGR1pos310_6_143	-40.8264	44.631	Hepatocytes
ASGR1pos310_6_144	-70.073	26.6233	Hepatocytes
ASGR1pos310_6_146	-52.7901	8.95632	Hepatocytes
ASGR1pos310_6_149	-58.5774	4.01795	Hepatocytes
ASGR1pos310_6_151	-55.5392	37.0307	Hepatocytes
ASGR1pos310_6_156	-39.4637	47.6215	Hepatocytes
ASGR1pos310_6_158	-65.6118	-3.1595	Hepatocytes
ASGR1pos310_6_160	-60.319	24.8718	Hepatocytes
ASGR1pos310_6_161	-63.6842	26.5808	Hepatocytes
ASGR1pos310_6_162	-67.2643	19.4235	Hepatocytes
ASGR1pos310_6_168	-55.871	34.7369	Hepatocytes
ASGR1pos310_6_169	-40.621	47.1233	Hepatocytes
ASGR1pos310_6_170	-53.1594	27.6573	Hepatocytes
ASGR1pos310_6_172	-52.8658	38.5383	Hepatocytes
ASGR1pos310_6_173	-51.3175	27.182	Hepatocytes
ASGR1pos310_6_174	-36.8601	49.3735	Hepatocytes
ASGR1pos310_6_175	-62.3388	30.1828	Hepatocytes
ASGR1pos310_6_176	-54.9605	26.699	Hepatocytes
ASGR1pos310_6_177	-37.4277	50.4245	Hepatocytes
ASGR1pos310_6_179	-60.1016	31.0656	Hepatocytes
ASGR1pos310_6_180	-70.303	12.2737	Hepatocytes
ASGR1pos310_6_182	-61.0879	33.2295	Hepatocytes
ASGR1pos310_6_183	-57.4921	36.9601	Hepatocytes
ASGR1pos310_6_186	-33.7704	51.9871	Hepatocytes
ASGR1pos310_6_188	-48.0172	40.7624	Hepatocytes
ASGR1pos310_6_189	-67.7402	20.0674	Hepatocytes
ASGR1pos310_6_190	-63.184	34.3324	Hepatocytes
ASGR1pos310_6_191	-63.8703	25.4897	Hepatocytes
ASGR1pos310_7_1	-74.6769	11.9216	Hepatocytes
ASGR1pos310_7_3	-27.0989	61.9966	Hepatocytes
ASGR1pos310_7_5	-64.3339	24.5596	Hepatocytes
ASGR1pos310_7_7	-47.1088	42.9942	Hepatocytes
ASGR1pos310_7_8	-59.5919	33.7751	Hepatocytes
ASGR1pos310_7_10	-72.4373	20.5029	Hepatocytes
ASGR1pos310_7_11	-73.3842	13.7507	Hepatocytes
ASGR1pos310_7_12	-68.9176	24.9882	Hepatocytes
ASGR1pos310_7_14	9.9406	72.7352	Hepatocytes
ASGR1pos310_7_15	-48.7301	41.0593	Hepatocytes
ASGR1pos310_7_16	-66.9242	28.9036	Hepatocytes
ASGR1pos310_7_17	-55.5203	37.0777	Hepatocytes
ASGR1pos310_7_18	-73.0502	20.0407	Hepatocytes
ASGR1pos310_7_19	-53.4681	39.6281	Hepatocytes
ASGR1pos310_7_21	-73.8821	13.8896	Hepatocytes
ASGR1pos310_7_22	-53.4862	32.3905	Hepatocytes
ASGR1pos310_7_23	-25.1344	62.1414	Hepatocytes
ASGR1pos310_7_27	-67.0938	27.8854	Hepatocytes
ASGR1pos310_7_29	-26.4632	61.4347	Hepatocytes
ASGR1pos310_7_30	-50.01	38.7951	Hepatocytes
ASGR1pos310_7_34	-43.3289	45.2445	Hepatocytes
ASGR1pos310_7_35	-43.9436	44.5492	Hepatocytes
ASGR1pos310_7_36	-35.7295	50.2725	Hepatocytes
ASGR1pos310_7_37	-53.2285	41.0028	Hepatocytes
ASGR1pos310_7_38	-59.4522	32.0948	Hepatocytes
ASGR1pos310_7_42	-51.8254	38.5377	Hepatocytes
ASGR1pos310_7_43	-24.9086	63.4951	Hepatocytes
ASGR1pos310_7_44	-3.05245	77.4368	Hepatocytes
ASGR1pos310_7_45	-38.5155	49.304	Hepatocytes
ASGR1pos310_7_48	-25.4894	62.8283	Hepatocytes
ASGR1pos310_7_50	-49.3918	40.1086	Hepatocytes
ASGR1pos310_7_52	-54.6656	38.8196	Hepatocytes
ASGR1pos310_7_54	-26.5948	61.6927	Hepatocytes
ASGR1pos310_7_56	-0.397826	73.7899	Hepatocytes
ASGR1pos310_7_57	-56.4997	37.2479	Hepatocytes
ASGR1pos310_7_58	-75.0259	9.88932	Hepatocytes
ASGR1pos310_7_59	-33.95	49.7373	Hepatocytes
ASGR1pos310_7_60	-56.851	37.0501	Hepatocytes
ASGR1pos310_7_61	-50.9096	37.6549	Hepatocytes
ASGR1pos310_7_62	-32.7066	55.5006	Hepatocytes
ASGR1pos310_7_63	-41.7081	40.6865	Hepatocytes
ASGR1pos310_7_64	-66.1172	32.019	Hepatocytes
ASGR1pos310_7_65	-72.0456	11.7509	Hepatocytes
ASGR1pos310_7_67	-36.502	49.2147	Hepatocytes
ASGR1pos310_7_68	-66.0314	24.9969	Hepatocytes
ASGR1pos310_7_71	-67.3366	28.7251	Hepatocytes
ASGR1pos310_7_73	-41.0479	44.3165	Hepatocytes
ASGR1pos310_7_76	-53.7507	32.5435	Hepatocytes
ASGR1pos310_7_80	-66.5771	27.8446	Hepatocytes
ASGR1pos310_7_81	-74.4304	7.5669	Hepatocytes
ASGR1pos310_7_83	-42.582	45.3079	Hepatocytes
ASGR1pos310_7_85	-67.8044	27.9025	Hepatocytes
ASGR1pos310_7_87	-70.1838	10.5935	Hepatocytes
ASGR1pos310_7_92	-66.0271	28.9028	Hepatocytes
ASGR1pos310_7_93	-57.9641	32.9315	Hepatocytes
ASGR1pos310_7_94	-46.3331	43.8611	Hepatocytes
ASGR1pos310_7_95	-66.5949	29.2017	Hepatocytes
ASGR1pos310_8_98	-42.7478	44.3091	Hepatocytes
ASGR1pos310_8_100	-62.1736	34.7824	Hepatocytes
ASGR1pos310_8_102	-67.8103	23.0794	Hepatocytes
ASGR1pos310_8_104	-52.3616	38.9527	Hepatocytes
ASGR1pos310_8_107	-43.4352	39.887	Hepatocytes
ASGR1pos310_8_110	-64.3841	24.4776	Hepatocytes
ASGR1pos310_8_115	-64.7806	24.096	Hepatocytes
ASGR1pos310_8_117	-60.2657	30.9637	Hepatocytes
ASGR1pos310_8_118	-62.4628	30.0713	Hepatocytes
ASGR1pos310_8_119	-51.5048	35.1255	Hepatocytes
ASGR1pos310_8_124	-59.2076	25.7669	Hepatocytes
ASGR1pos310_8_125	-64.7718	29.8202	Hepatocytes
ASGR1pos310_8_129	-22.6061	66.3341	Hepatocytes
ASGR1pos310_8_130	-46.5933	43.3681	Hepatocytes
ASGR1pos310_8_132	-57.81	34.8495	Hepatocytes
ASGR1pos310_8_134	-52.0762	37.5399	Hepatocytes
ASGR1pos310_8_135	-66.8418	1.9498	Hepatocytes
ASGR1pos310_8_141	-35.585	49.6218	Hepatocytes
ASGR1pos310_8_143	-24.8583	63.5465	Hepatocytes
ASGR1pos310_8_145	-47.7365	41.407	Hepatocytes
ASGR1pos310_8_151	-62.4392	32.2099	Hepatocytes
ASGR1pos310_8_153	-52.5878	36.3538	Hepatocytes
ASGR1pos310_8_154	-46.2416	41.6572	Hepatocytes
ASGR1pos310_8_156	-14.4547	67.762	Hepatocytes
ASGR1pos310_8_157	-53.0306	38.7279	Hepatocytes
ASGR1pos310_8_164	-62.2212	30.5017	Hepatocytes
ASGR1pos310_8_170	-41.3622	45.292	Hepatocytes
ASGR1pos310_8_175	-68.1196	28.0362	Hepatocytes
ASGR1pos310_8_179	-56.2816	35.0924	Hepatocytes
ASGR1pos310_8_182	-65.6953	29.9293	Hepatocytes
ASGR1pos310_8_183	-73.6131	15.7559	Hepatocytes
ASGR1pos310_8_185	-67.209	23.4032	Hepatocytes
ASGR1pos310_8_187	-53.8065	32.6089	Hepatocytes
ASGR1pos310_8_189	-30.1191	55.9435	Hepatocytes
ASGR1pos310_8_190	-14.5357	67.983	Hepatocytes
ASGR1pos315_1_25	-67.8172	-2.04062	Hepatocytes
ASGR1pos315_1_28	-72.9213	0.772979	Hepatocytes
ASGR1pos315_1_36	-72.8795	-2.09284	Hepatocytes
ASGR1pos315_1_39	-66.881	-3.60686	Hepatocytes
ASGR1pos315_1_48	-4.43486	51.3859	Hepatocytes
ASGR1pos315_1_54	-72.0234	-0.526087	Hepatocytes
ASGR1pos315_1_60	-61.1654	28.2395	Hepatocytes
ASGR1pos315_1_62	-68.5742	-2.14262	Hepatocytes
ASGR1pos315_1_67	-42.3438	-22.7844	Cholangiocytes
ASGR1pos315_1_71	-58.5098	29.8842	Hepatocytes
ASGR1pos315_1_81	-69.1269	-2.43848	Hepatocytes
ASGR1pos315_2_106	-60.7257	5.05258	Hepatocytes
ASGR1pos315_2_111	-74.112	-6.13713	Hepatocytes
ASGR1pos315_2_129	-74.9346	-3.40167	Hepatocytes
ASGR1pos315_2_135	-61.1679	9.43081	Hepatocytes
ASGR1pos315_2_159	-47.6062	36.5996	Hepatocytes
ASGR1pos315_2_164	-65.3086	3.85327	Hepatocytes
ASGR1pos315_2_169	-63.7858	21.879	Hepatocytes
ASGR1pos315_2_180	-64.9128	0.470073	Hepatocytes
ASGR1pos315_2_181	-68.9959	15.4868	Hepatocytes
ASGR1pos315_2_184	-55.1199	15.0913	Hepatocytes
ASGR1pos315_3_6	-70.1504	-4.69566	Hepatocytes
ASGR1pos315_3_29	-70.7411	0.577492	Hepatocytes
ASGR1pos315_3_33	-68.8821	-2.68417	Hepatocytes
ASGR1pos315_3_36	-74.9557	5.57692	Hepatocytes
ASGR1pos315_3_41	-61.2845	9.07138	Hepatocytes
ASGR1pos315_3_48	-66.5459	-1.783	Hepatocytes
ASGR1pos315_3_53	-66.1648	4.24736	Hepatocytes
ASGR1pos315_3_74	9.63176	-4.25551	T_NK
ASGR1pos315_3_81	-55.5616	12.9888	Hepatocytes
ASGR1pos315_3_92	-70.9574	-4.7583	Hepatocytes
ASGR1pos315_4_109	-64.973	5.03267	Hepatocytes
ASGR1pos315_4_119	-66.6619	7.45731	Hepatocytes
ASGR1pos315_4_122	-69.2539	-3.1755	Hepatocytes
ASGR1pos315_4_143	-55.8358	13.7366	Hepatocytes
ASGR1pos315_4_148	-72.3964	-0.333336	Hepatocytes
ASGR1pos315_4_159	-65.4382	4.61537	Hepatocytes
ASGR1pos315_4_166	-67.4596	-2.39747	Hepatocytes
ASGR1pos325_1_2	15.0927	-22.6241	T_NK
ASGR1pos325_1_3	-71.8575	-5.1856	Hepatocytes
ASGR1pos325_1_5	41.2212	-39.2683	T_NK
ASGR1pos325_1_6	-73.8427	-3.17743	Hepatocytes
ASGR1pos325_1_7	-69.7933	25.1838	Hepatocytes
ASGR1pos325_1_9	33.3054	-2.58062	T_NK
ASGR1pos325_1_10	-71.2357	-3.20456	Hepatocytes
ASGR1pos325_1_11	-72.2021	9.66573	Hepatocytes
ASGR1pos325_1_12	-23.9262	-34.9394	Hepatocytes
ASGR1pos325_1_14	68.8582	-33.811	T_NK
ASGR1pos325_1_15	-72.0493	4.68202	Hepatocytes
ASGR1pos325_1_16	-43.1813	-40.4024	Cholangiocytes
ASGR1pos325_1_17	8.11825	2.62988	T_NK
ASGR1pos325_1_21	-67.1859	-3.41676	Hepatocytes
ASGR1pos325_1_22	-75.1663	-6.25469	Hepatocytes
ASGR1pos325_1_23	-67.8407	-2.95071	Hepatocytes
ASGR1pos325_1_25	60.3778	-23.3653	T_NK
ASGR1pos325_1_28	-75.0227	16.7574	Hepatocytes
ASGR1pos325_1_32	13.1633	-21.6361	T_NK
ASGR1pos325_1_33	7.53905	-6.78564	T_NK
ASGR1pos325_1_34	-49.0825	38.9453	Hepatocytes
ASGR1pos325_1_36	63.5832	-23.7189	T_NK
ASGR1pos325_1_37	-52.2774	33.4386	Hepatocytes
ASGR1pos325_1_38	65.9114	-2.27944	T_NK
ASGR1pos325_1_39	-70.3954	22.703	Hepatocytes
ASGR1pos325_1_40	-46.9123	38.224	Hepatocytes
ASGR1pos325_1_41	-10.2375	-72.0654	Hepatocytes
ASGR1pos325_1_43	-66.1976	1.25567	Hepatocytes
ASGR1pos325_1_44	57.7418	-49.8815	T_NK
ASGR1pos325_1_45	-42.9721	44.6404	Hepatocytes
ASGR1pos325_1_53	69.6802	-11.9009	T_NK
ASGR1pos325_1_54	-69.7858	23.0173	Hepatocytes
ASGR1pos325_1_55	-52.0101	33.5966	Hepatocytes
ASGR1pos325_1_60	-69.9033	-2.59827	Hepatocytes
ASGR1pos325_1_61	-58.4455	23.592	Hepatocytes
ASGR1pos325_1_62	64.3807	-38.8897	T_NK
ASGR1pos325_1_64	35.0229	15.3982	T_NK
ASGR1pos325_1_66	-66.5748	-3.54522	Hepatocytes
ASGR1pos325_1_67	55.199	-41.5215	T_NK
ASGR1pos325_1_68	31.2235	14.4746	T_NK
ASGR1pos325_1_70	-43.6414	39.3898	Hepatocytes
ASGR1pos325_1_71	-53.5358	-23.7914	Hepatocytes
ASGR1pos325_1_72	59.0988	-21.7612	T_NK
ASGR1pos325_1_73	55.6003	-41.4195	T_NK
ASGR1pos325_1_74	-70.2521	23.5889	Hepatocytes
ASGR1pos325_1_75	56.9966	-8.84508	T_NK
ASGR1pos325_1_76	61.9264	-30.9749	T_NK
ASGR1pos325_1_77	55.7153	-5.54891	T_NK
ASGR1pos325_1_78	-70.2318	15.5634	Hepatocytes
ASGR1pos325_1_79	-62.2047	32.9567	Hepatocytes
ASGR1pos325_1_81	-63.2045	4.88729	Hepatocytes
ASGR1pos325_1_83	-72.4809	-3.28772	Hepatocytes
ASGR1pos325_1_84	-73.42	7.07754	Hepatocytes
ASGR1pos325_1_85	-72.7712	21.077	Hepatocytes
ASGR1pos325_1_86	61.7223	-31.6293	T_NK
ASGR1pos325_1_87	54.7907	-49.6873	T_NK
ASGR1pos325_1_88	-19.3406	-23.3196	T_NK
ASGR1pos325_1_89	-71.2593	9.87043	Hepatocytes
ASGR1pos325_1_92	-38.0318	49.6373	Hepatocytes
ASGR1pos325_1_93	57.9867	14.7151	T_NK
ASGR1pos325_1_94	62.5739	-0.226174	T_NK
ASGR1pos325_2_98	64.634	-34.5473	T_NK
ASGR1pos325_2_100	-29.0601	-26.8132	Hepatocytes
ASGR1pos325_2_102	-51.0643	33.8839	Hepatocytes
ASGR1pos325_2_104	-62.8469	5.02639	Hepatocytes
ASGR1pos325_2_105	60.9234	-34.9567	T_NK
ASGR1pos325_2_109	-36.7756	45.9762	Hepatocytes
ASGR1pos325_2_117	64.7626	1.91624	T_NK
ASGR1pos325_2_118	-72.9039	7.72219	Hepatocytes
ASGR1pos325_2_120	-71.1069	1.71891	Hepatocytes
ASGR1pos325_2_122	53.3882	-50.1468	T_NK
ASGR1pos325_2_123	-62.5096	24.0895	Hepatocytes
ASGR1pos325_2_124	-24.8952	61.0072	Hepatocytes
ASGR1pos325_2_127	-69.1387	24.8068	Hepatocytes
ASGR1pos325_2_128	31.2783	-50.7334	T_NK
ASGR1pos325_2_130	-70.7234	11.5685	Hepatocytes
ASGR1pos325_2_131	-72.0491	9.5427	Hepatocytes
ASGR1pos325_2_132	-74.0011	1.88015	Hepatocytes
ASGR1pos325_2_133	39.9388	13.8793	T_NK
ASGR1pos325_2_135	56.369	-42.2402	T_NK
ASGR1pos325_2_137	69.8013	-7.09943	T_NK
ASGR1pos325_2_138	-73.9794	12.6153	Hepatocytes
ASGR1pos325_2_140	59.017	-40.4363	T_NK
ASGR1pos325_2_141	49.3718	-19.1794	T_NK
ASGR1pos325_2_143	64.6137	-31.0454	T_NK
ASGR1pos325_2_144	12.1592	-16.3109	T_NK
ASGR1pos325_2_145	-71.5971	-4.81378	Hepatocytes
ASGR1pos325_2_151	53.8557	-25.8766	T_NK
ASGR1pos325_2_154	-67.4587	24.7092	Hepatocytes
ASGR1pos325_2_155	64.2745	-5.97638	T_NK
ASGR1pos325_2_158	66.1075	-2.18364	T_NK
ASGR1pos325_2_159	-71.5001	16.1867	Hepatocytes
ASGR1pos325_2_160	-70.8265	16.6995	Hepatocytes
ASGR1pos325_2_162	-62.149	33.3265	Hepatocytes
ASGR1pos325_2_163	-73.2313	16.093	Hepatocytes
ASGR1pos325_2_166	-38.747	46.4806	Hepatocytes
ASGR1pos325_2_167	-69.3792	22.9795	Hepatocytes
ASGR1pos325_2_168	-54.6366	27.1118	Hepatocytes
ASGR1pos325_2_169	64.4616	-31.0955	T_NK
ASGR1pos325_2_170	-61.1817	22.8351	Hepatocytes
ASGR1pos325_2_171	65.58	1.45249	T_NK
ASGR1pos325_2_173	-41.7091	46.4588	Hepatocytes
ASGR1pos325_2_175	14.1232	13.6012	T_NK
ASGR1pos325_2_176	-67.2378	10.9379	Hepatocytes
ASGR1pos325_2_177	48.4677	-45.1759	T_NK
ASGR1pos325_2_178	-60.494	34.3383	Hepatocytes
ASGR1pos325_2_181	-38.0806	46.8758	Hepatocytes
ASGR1pos325_2_183	-68.1021	24.6795	Hepatocytes
ASGR1pos325_2_184	13.7602	-34.496	T_NK
ASGR1pos325_2_185	-69.3076	23.7456	Hepatocytes
ASGR1pos325_2_188	-38.553	47.8234	Hepatocytes
ASGR1pos325_2_190	-63.5527	26.4702	Hepatocytes
ASGR1pos325_2_191	-73.236	8.77015	Hepatocytes
ASGR1pos325_2_192	-61.595	27.9868	Hepatocytes
ASGR1posCD45neg_10_98	-59.8341	33.2014	Hepatocytes
ASGR1posCD45neg_10_100	-48.6711	37.9934	Hepatocytes
ASGR1posCD45neg_10_106	-68.5029	25.857	Hepatocytes
ASGR1posCD45neg_10_109	-44.823	-18.3692	Cholangiocytes
ASGR1posCD45neg_10_110	-71.8396	8.46992	Hepatocytes
ASGR1posCD45neg_10_114	-70.4348	24.5663	Hepatocytes
ASGR1posCD45neg_10_122	-54.4708	37.4803	Hepatocytes
ASGR1posCD45neg_10_124	-60.4645	34.1776	Hepatocytes
ASGR1posCD45neg_10_126	-71.4472	14.5181	Hepatocytes
ASGR1posCD45neg_10_127	-50.2797	39.9384	Hepatocytes
ASGR1posCD45neg_10_129	-71.1984	8.14958	Hepatocytes
ASGR1posCD45neg_10_130	-74.7762	15.5254	Hepatocytes
ASGR1posCD45neg_10_134	-64.2257	31.0741	Hepatocytes
ASGR1posCD45neg_10_138	-45.7981	-6.53143	Hepatocytes
ASGR1posCD45neg_10_141	-48.1416	38.6372	Hepatocytes
ASGR1posCD45neg_10_142	-65.7451	1.00472	Hepatocytes
ASGR1posCD45neg_10_144	-72.7286	7.58298	Hepatocytes
ASGR1posCD45neg_10_146	-54.5142	32.3889	Hepatocytes
ASGR1posCD45neg_10_148	-63.0085	35.2612	Hepatocytes
ASGR1posCD45neg_10_149	-60.0876	-35.9517	Cholangiocytes
ASGR1posCD45neg_10_150	-69.9085	23.1679	Hepatocytes
ASGR1posCD45neg_10_152	-73.0373	6.75084	Hepatocytes
ASGR1posCD45neg_10_154	-70.2479	-2.58455	Hepatocytes
ASGR1posCD45neg_10_158	-71.394	-0.0674096	Hepatocytes
ASGR1posCD45neg_10_169	-75.7905	15.1486	Hepatocytes
ASGR1posCD45neg_10_171	-74.2583	14.0296	Hepatocytes
ASGR1posCD45neg_10_173	-73.3999	7.53106	Hepatocytes
ASGR1posCD45neg_10_175	-73.8913	11.1282	Hepatocytes
ASGR1posCD45neg_10_176	-72.1894	6.36699	Hepatocytes
ASGR1posCD45neg_10_178	-72.9911	18.8378	Hepatocytes
ASGR1posCD45neg_10_181	-73.267	6.88326	Hepatocytes
ASGR1posCD45neg_10_183	-69.4302	6.57265	Hepatocytes
ASGR1posCD45neg_10_184	-72.2161	17.6783	Hepatocytes
ASGR1posCD45neg_10_185	-62.6426	33.4927	Hepatocytes
ASGR1posCD45neg_10_188	-50.6592	40.2896	Hepatocytes
ASGR1posCD45neg_10_191	-72.8818	6.11077	Hepatocytes
ASGR1posCD45neg_10_192	-72.6023	15.73	Hepatocytes
ASGR1posCD45neg_9_1	-73.0246	19.9797	Hepatocytes
ASGR1posCD45neg_9_2	-27.5476	-44.2985	Hepatocytes
ASGR1posCD45neg_9_4	-73.5999	2.48342	Hepatocytes
ASGR1posCD45neg_9_5	-72.9516	9.25113	Hepatocytes
ASGR1posCD45neg_9_6	-42.7176	44.8431	Hepatocytes
ASGR1posCD45neg_9_8	-72.0416	7.88063	Hepatocytes
ASGR1posCD45neg_9_10	-66.8851	25.2405	Hepatocytes
ASGR1posCD45neg_9_12	-60.4104	34.1557	Hepatocytes
ASGR1posCD45neg_9_14	-71.5158	15.9489	Hepatocytes
ASGR1posCD45neg_9_15	-71.028	-1.28832	Hepatocytes
ASGR1posCD45neg_9_21	-60.2522	33.1281	Hepatocytes
ASGR1posCD45neg_9_27	-60.9331	33.8449	Hepatocytes
ASGR1posCD45neg_9_28	-71.8717	5.3436	Hepatocytes
ASGR1posCD45neg_9_29	-47.7103	37.9361	Hepatocytes
ASGR1posCD45neg_9_30	-62.9043	32.6891	Hepatocytes
ASGR1posCD45neg_9_33	-70.2083	26.1035	Hepatocytes
ASGR1posCD45neg_9_35	-68.7538	12.7147	Hepatocytes
ASGR1posCD45neg_9_37	-73.9314	8.50011	Hepatocytes
ASGR1posCD45neg_9_41	-28.0391	60.799	Hepatocytes
ASGR1posCD45neg_9_43	-39.1316	47.3067	Hepatocytes
ASGR1posCD45neg_9_45	-75.4215	15.9724	Hepatocytes
ASGR1posCD45neg_9_49	-61.2197	34.2032	Hepatocytes
ASGR1posCD45neg_9_50	-72.3966	-4.02611	Hepatocytes
ASGR1posCD45neg_9_51	-73.5789	9.02778	Hepatocytes
ASGR1posCD45neg_9_52	-73.4396	18.8955	Hepatocytes
ASGR1posCD45neg_9_55	-70.6626	25.887	Hepatocytes
ASGR1posCD45neg_9_56	-69.3222	24.8663	Hepatocytes
ASGR1posCD45neg_9_60	-67.4727	25.415	Hepatocytes
ASGR1posCD45neg_9_62	-47.6199	39.6165	Hepatocytes
ASGR1posCD45neg_9_63	-38.5998	46.3201	Hepatocytes
ASGR1posCD45neg_9_67	-26.1897	62.1663	Hepatocytes
ASGR1posCD45neg_9_68	-28.2533	-35.8843	Hepatocytes
ASGR1posCD45neg_9_71	-73.2691	7.11368	Hepatocytes
ASGR1posCD45neg_9_72	-65.964	25.6679	Hepatocytes
ASGR1posCD45neg_9_75	-67.9799	10.642	Hepatocytes
ASGR1posCD45neg_9_78	-69.1661	23.9972	Hepatocytes
ASGR1posCD45neg_9_79	-41.1514	40.9604	Hepatocytes
ASGR1posCD45neg_9_81	-73.3297	-1.52914	Hepatocytes
ASGR1posCD45neg_9_82	-23.0505	66.6855	Hepatocytes
ASGR1posCD45neg_9_83	-51.481	38.6125	Hepatocytes
ASGR1posCD45neg_9_84	-25.0635	15.1523	Hepatocytes
ASGR1posCD45neg_9_91	-49.4104	37.9461	Hepatocytes
ASGR1posCD45neg_9_92	-37.2246	48.8187	Hepatocytes
ASGR1posCD45neg_9_94	-73.1899	14.548	Hepatocytes
ASGR1posCD45neg_9_95	-27.8854	-45.5457	Hepatocytes
ASGR1posCD45neg_9_96	-54.0988	27.3534	Hepatocytes
ASGR1posCD45pos_11_1	29.1357	-31.6581	T_NK
ASGR1posCD45pos_11_3	29.6519	-29.1404	T_NK
ASGR1posCD45pos_11_4	31.4699	-48.385	T_NK
ASGR1posCD45pos_11_5	29.9293	-20.6329	T_NK
ASGR1posCD45pos_11_6	42.0218	-3.42129	T_NK
ASGR1posCD45pos_11_7	30.1954	-20.1823	T_NK
ASGR1posCD45pos_11_9	41.3305	-6.5041	T_NK
ASGR1posCD45pos_11_10	24.3394	-33.5568	T_NK
ASGR1posCD45pos_11_11	40.7671	-4.6749	Hepatocytes
ASGR1posCD45pos_11_12	12.7556	-24.0493	T_NK
ASGR1posCD45pos_11_15	12.5132	-21.4202	T_NK
ASGR1posCD45pos_11_16	39.5632	-3.25499	T_NK
ASGR1posCD45pos_11_17	11.5635	-20.9838	T_NK
ASGR1posCD45pos_11_18	58.7774	-18.3474	T_NK
ASGR1posCD45pos_11_19	33.3334	-46.257	T_NK
ASGR1posCD45pos_11_20	29.0781	-15.505	T_NK
ASGR1posCD45pos_11_21	31.7484	-21.3817	T_NK
ASGR1posCD45pos_11_22	35.0213	-6.49029	T_NK
ASGR1posCD45pos_11_23	26.53	12.8847	T_NK
ASGR1posCD45pos_11_24	40.393	16.8425	T_NK
ASGR1posCD45pos_11_25	29.6643	-20.5185	T_NK
ASGR1posCD45pos_11_26	40.0805	12.9058	T_NK
ASGR1posCD45pos_11_27	37.1786	-43.2434	T_NK
ASGR1posCD45pos_11_28	42.4443	-7.72378	T_NK
ASGR1posCD45pos_11_29	33.3211	-40.7953	T_NK
ASGR1posCD45pos_11_32	51.6441	-18.6478	T_NK
ASGR1posCD45pos_11_33	36.9145	18.37	T_NK
ASGR1posCD45pos_11_34	39.7064	-2.86519	T_NK
ASGR1posCD45pos_11_35	42.575	-7.59121	T_NK
ASGR1posCD45pos_11_36	37.2515	-27.6171	T_NK
ASGR1posCD45pos_11_37	33.8692	2.46997	Hepatocytes
ASGR1posCD45pos_11_38	27.238	-51.0533	T_NK
ASGR1posCD45pos_11_39	38.7406	4.75353	T_NK
ASGR1posCD45pos_11_40	44.4888	-5.61215	T_NK
ASGR1posCD45pos_11_41	37.1925	-27.2189	T_NK
ASGR1posCD45pos_11_42	59.1271	-23.0062	T_NK
ASGR1posCD45pos_11_43	37.0865	3.82871	T_NK
ASGR1posCD45pos_11_44	39.4004	10.0911	Hepatocytes
ASGR1posCD45pos_11_45	35.6949	6.91206	T_NK
ASGR1posCD45pos_11_46	28.5701	-29.2606	T_NK
ASGR1posCD45pos_11_48	39.1775	3.62182	T_NK
ASGR1posCD45pos_11_49	35.5055	-25.3028	T_NK
ASGR1posCD45pos_11_50	28.8211	-29.6832	T_NK
ASGR1posCD45pos_11_51	59.0971	-22.8021	T_NK
ASGR1posCD45pos_11_52	36.9071	-25.8534	T_NK
ASGR1posCD45pos_11_53	34.74	-26.3229	T_NK
ASGR1posCD45pos_11_54	63.9738	-26.5985	T_NK
ASGR1posCD45pos_11_55	23.7507	-13.6098	T_NK
ASGR1posCD45pos_11_56	19.2677	-19.0035	Hepatocytes
ASGR1posCD45pos_11_58	60.2801	-35.792	T_NK
ASGR1posCD45pos_11_60	45.7846	-4.79303	T_NK
ASGR1posCD45pos_11_61	37.1836	-27.868	T_NK
ASGR1posCD45pos_11_62	-4.29763	-0.154452	T_NK
ASGR1posCD45pos_11_63	31.9885	-19.2846	T_NK
ASGR1posCD45pos_11_64	27.4035	26.9333	T_NK
ASGR1posCD45pos_11_65	41.1726	-20.148	T_NK
ASGR1posCD45pos_11_66	41.2746	-2.68597	T_NK
ASGR1posCD45pos_11_68	41.5693	-3.36481	T_NK
ASGR1posCD45pos_11_69	43.0026	-2.06486	T_NK
ASGR1posCD45pos_11_70	35.46	-28.4639	T_NK
ASGR1posCD45pos_11_71	42.5345	-4.1405	T_NK
ASGR1posCD45pos_11_72	33.7804	-5.7468	T_NK
ASGR1posCD45pos_11_73	31.3218	-21.3469	T_NK
ASGR1posCD45pos_11_74	35.9864	7.80867	T_NK
ASGR1posCD45pos_11_75	36.0887	19.2533	T_NK
ASGR1posCD45pos_11_76	40.4722	5.41696	T_NK
ASGR1posCD45pos_11_77	59.5081	-21.3466	T_NK
ASGR1posCD45pos_11_78	47.8691	-44.5279	T_NK
ASGR1posCD45pos_11_79	31.9697	-25.5552	T_NK
ASGR1posCD45pos_11_80	35.679	-24.188	T_NK
ASGR1posCD45pos_11_81	32.5744	-2.78785	T_NK
ASGR1posCD45pos_11_82	58.7218	20.3026	Hepatocytes
ASGR1posCD45pos_11_83	38.657	3.90216	T_NK
ASGR1posCD45pos_11_84	51.8206	-44.6059	T_NK
ASGR1posCD45pos_11_85	65.8354	2.18873	T_NK
ASGR1posCD45pos_11_86	64.9177	-32.5004	T_NK
ASGR1posCD45pos_11_87	26.6663	11.0612	T_NK
ASGR1posCD45pos_11_88	41.9601	-31.2906	T_NK
ASGR1posCD45pos_11_89	58.4481	-33.3392	T_NK
ASGR1posCD45pos_11_90	38.4038	4.06112	Hepatocytes
ASGR1posCD45pos_11_92	44.3416	-28.0398	T_NK
ASGR1posCD45pos_11_93	31.2557	-41.6644	T_NK
ASGR1posCD45pos_11_94	31.8744	3.83754	T_NK
ASGR1posCD45pos_11_95	57.3254	-34.5462	T_NK
ASGR1posCD45pos_12_97	29.2879	-29.8031	T_NK
ASGR1posCD45pos_12_98	29.6843	-28.1705	T_NK
ASGR1posCD45pos_12_99	34.4667	9.08202	T_NK
ASGR1posCD45pos_12_100	39.4661	13.53	T_NK
ASGR1posCD45pos_12_102	31.1854	-20.846	T_NK
ASGR1posCD45pos_12_103	41.638	-8.52944	T_NK
ASGR1posCD45pos_12_104	2.00401	0.22051	Hepatocytes
ASGR1posCD45pos_12_105	31.4128	3.03704	T_NK
ASGR1posCD45pos_12_108	24.8687	15.3739	T_NK
ASGR1posCD45pos_12_109	39.6946	11.6332	Hepatocytes
ASGR1posCD45pos_12_110	42.3183	-5.29646	T_NK
ASGR1posCD45pos_12_111	21.1771	-12.4482	T_NK
ASGR1posCD45pos_12_113	13.2147	-22.0084	T_NK
ASGR1posCD45pos_12_114	-12.2503	-17.8292	T_NK
ASGR1posCD45pos_12_115	15.5979	-1.60872	T_NK
ASGR1posCD45pos_12_116	69.8852	-12.3575	T_NK
ASGR1posCD45pos_12_118	58.6648	-21.8872	T_NK
ASGR1posCD45pos_12_119	60.5252	-26.192	T_NK
ASGR1posCD45pos_12_121	34.5213	12.5895	T_NK
ASGR1posCD45pos_12_122	32.9274	-23.4899	T_NK
ASGR1posCD45pos_12_123	-27.1897	42.5059	Hepatocytes
ASGR1posCD45pos_12_124	39.7322	9.78641	Hepatocytes
ASGR1posCD45pos_12_127	46.7525	22.2148	T_NK
ASGR1posCD45pos_12_129	36.5442	10.0076	Hepatocytes
ASGR1posCD45pos_12_130	-20.7735	-23.6229	Hepatocytes
ASGR1posCD45pos_12_131	23.9186	9.53659	T_NK
ASGR1posCD45pos_12_134	32.6485	26.2352	T_NK
ASGR1posCD45pos_12_136	40.9634	-6.3239	T_NK
ASGR1posCD45pos_12_137	42.8807	-2.61149	T_NK
ASGR1posCD45pos_12_139	24.963	15.9245	T_NK
ASGR1posCD45pos_12_141	30.6769	-20.2213	T_NK
ASGR1posCD45pos_12_142	37.4947	-0.313193	T_NK
ASGR1posCD45pos_12_145	52.0827	-24.3339	T_NK
ASGR1posCD45pos_12_147	51.2152	11.7715	T_NK
ASGR1posCD45pos_12_148	38.407	34.3857	T_NK
ASGR1posCD45pos_12_150	35.4709	15.4149	T_NK
ASGR1posCD45pos_12_153	51.7625	-30.6368	T_NK
ASGR1posCD45pos_12_154	-18.7739	-23.4273	T_NK
ASGR1posCD45pos_12_155	57.1774	-17.9931	T_NK
ASGR1posCD45pos_12_156	34.8135	3.98424	Hepatocytes
ASGR1posCD45pos_12_158	68.9155	-2.30942	T_NK
ASGR1posCD45pos_12_159	66.156	-14.425	T_NK
ASGR1posCD45pos_12_161	40.4791	5.62324	T_NK
ASGR1posCD45pos_12_162	38.1486	-26.3915	T_NK
ASGR1posCD45pos_12_163	38.4162	-7.0402	T_NK
ASGR1posCD45pos_12_165	31.5219	26.7578	T_NK
ASGR1posCD45pos_12_166	40.6076	-6.57178	T_NK
ASGR1posCD45pos_12_167	47.892	-44.4714	T_NK
ASGR1posCD45pos_12_168	11.9493	-21.4539	T_NK
ASGR1posCD45pos_12_169	68.8143	-0.989041	T_NK
ASGR1posCD45pos_12_170	40.4961	4.42832	Hepatocytes
ASGR1posCD45pos_12_171	41.2246	16.673	T_NK
ASGR1posCD45pos_12_172	27.2518	26.962	Hepatocytes
ASGR1posCD45pos_12_173	40.5405	15.6635	T_NK
ASGR1posCD45pos_12_174	2.01456	-0.0332269	T_NK
ASGR1posCD45pos_12_175	32.5319	-2.77658	T_NK
ASGR1posCD45pos_12_177	41.2372	-4.78234	T_NK
ASGR1posCD45pos_12_178	40.9792	-7.02292	T_NK
ASGR1posCD45pos_12_180	49.1863	-44.3781	T_NK
ASGR1posCD45pos_12_181	40.8561	-6.52514	T_NK
ASGR1posCD45pos_12_182	31.772	4.08299	T_NK
ASGR1posCD45pos_12_183	38.8671	0.925801	T_NK
ASGR1posCD45pos_12_184	49.5807	13.2038	T_NK
ASGR1posCD45pos_12_185	40.5525	3.97776	T_NK
ASGR1posCD45pos_12_186	42.3788	-8.8993	T_NK
ASGR1posCD45pos_12_187	-21.61	-25.0121	Hepatocytes
ASGR1posCD45pos_12_188	62.5315	-25.904	T_NK
ASGR1posCD45pos_12_189	41.1154	-4.29382	T_NK
ASGR1posCD45pos_12_190	27.7421	16.5473	T_NK
ASGR1posCD45pos_12_191	40.6221	16.5547	T_NK
ASGR1pos_4_43	-6.51445	-78.1563	B_cells
ASGR1pos_4_105	39.3993	-57.2529	T_NK
ASGR1pos_4_110	-10.5132	7.69897	Cholangiocytes
ASGR1pos_4_120	55.8986	-24.6129	T_NK
ASGR1pos_4_125	34.1414	-44.1812	T_NK
ASGR1pos_4_135	-68.6487	-41.0651	Cholangiocytes
ASGR1pos_4_142	44.2205	-6.98484	T_NK
ASGR1pos_4_144	2.23041	10.7372	Cholangiocytes
ASGR1pos_4_150	23.9579	-32.5254	T_NK
ASGR1pos_4_154	-6.43817	-67.8346	T_NK
ASGR1pos_4_175	-49.8498	-41.4282	Cholangiocytes
ASGR1pos_4_176	-49.3161	42.592	Hepatocytes
ASGR1posfresh_4_105	39.3896	-57.2541	T_NK
ASGR1posfresh_4_110	-10.5053	7.69886	Cholangiocytes
ASGR1posfresh_4_117	21.3393	31.3655	T_NK
ASGR1posfresh_4_120	57.2159	-29.3681	T_NK
ASGR1posfresh_4_125	34.9888	-52.1114	T_NK
ASGR1posfresh_4_135	-68.7104	-41.0661	Cholangiocytes
ASGR1posfresh_4_138	27.6542	24.7006	T_NK
ASGR1posfresh_4_142	44.1716	-7.01662	T_NK
ASGR1posfresh_4_144	2.42291	10.8956	T_NK
ASGR1posfresh_4_150	23.9376	-32.6548	T_NK
ASGR1posfresh_4_151	-6.43883	-74.7309	Hepatocytes
ASGR1posfresh_4_154	28.6907	-17.6905	T_NK
ASGR1posfresh_4_157	16.6229	32.1251	Cholangiocytes
ASGR1posfresh_4_175	-49.8845	-41.5226	Cholangiocytes
ASGR1posfresh_4_176	-49.2653	42.6703	Hepatocytes
CD34pos315_5_3	27.773	-4.88973	T_NK
CD34pos315_5_10	54.316	-5.07902	T_NK
CD34pos315_5_16	12.5383	35.9647	Central_venous_LSECs
CD34pos315_5_26	-9.40976	-26.9976	Macrophage
CD34pos315_5_35	8.71097	-45.3499	Macrophage
CD34pos315_5_47	-18.4702	-16.1078	Central_venous_LSECs
CD34pos315_5_59	11.507	32.9324	Central_venous_LSECs
CD34pos315_5_65	7.41712	-46.6784	Macrophage
CD34pos315_5_67	55.1191	10.405	T_NK
CD34pos315_5_70	63.5838	-29.8035	T_NK
CD34pos315_5_80	-7.84334	-47.276	Macrophage
CD34pos315_5_82	8.56841	-44.6333	Macrophage
CD34pos315_6_98	12.0089	38.5689	Central_venous_LSECs
CD34pos315_6_114	61.7225	2.24581	T_NK
CD34pos315_6_123	11.5203	32.9738	Central_venous_LSECs
CD34pos315_6_130	57.9643	13.33	T_NK
CD34pos315_6_170	18.5059	31.8257	Central_venous_LSECs
CD34pos315_6_182	-12.6743	-20.2716	Macrophage
CD34pos315_6_190	67.8822	-32.5786	T_NK
CD34pos325fresh_10_43	-6.30876	-78.6994	B_cells
CD34pos325fresh_10_112	67.0677	-42.3133	T_NK
CD34pos325fresh_10_115	52.9182	-43.4954	T_NK
CD34pos325fresh_10_138	-12.2261	-13.4612	Macrophage
CD34pos325fresh_10_144	-53.031	-43.7313	Cholangiocytes
CD34pos325fresh_10_147	-13.7465	-21.2727	Macrophage
CD34pos325fresh_10_161	32.985	-56.6475	T_NK
CD34pos325fresh_10_171	44.5845	-33.4695	T_NK
CD34pos325fresh_10_178	-17.3427	-34.5587	Central_venous_LSECs
CD34pos325fresh_10_186	-51.1381	-41.2262	Cholangiocytes
CD34pos325fresh_11_43	-6.4806	-78.2492	B_cells
CD34pos325fresh_11_62	59.2026	18.3803	T_NK
CD34pos325fresh_11_95	67.1176	-42.3354	Central_venous_LSECs
CD34pos325fresh_12_155	10.2053	-50.4972	Macrophage
CD34pos325fresh_12_166	10.7094	-46.3995	Macrophage
CD34pos325fresh_12_175	-13.1349	-20.7364	Macrophage
CD34pos325fresh_12_181	6.02604	-20.2278	Central_venous_LSECs
CD34pos325fresh_12_183	63.1848	-15.1817	T_NK
CD34pos325fresh_12_187	-7.82035	-71.4491	B_cells
CD34pos325fresh_9_9	10.2183	-50.4661	Macrophage
CD34pos325fresh_9_18	10.6127	-49.6462	Macrophage
CD34pos325fresh_9_21	57.9907	-23.4792	T_NK
CD34pos325fresh_9_24	13.718	-45.7681	Macrophage
CD34pos325fresh_9_27	33.9197	-35.3127	T_NK
CD34pos325fresh_9_44	-10.7449	-48.9427	Macrophage
CD34pos_10_128	-23.0511	-35.0975	T_NK
CD34pos_10_129	34.5944	-24.2827	B_cells
CD34pos_10_151	68.8951	-13.8613	T_NK
CD34pos_10_179	-11.7038	-25.2632	Macrophage
CD34pos_9_1	-15.7929	-25.3017	Macrophage
CD34pos_9_7	-9.80716	-32.8514	T_NK
CD34pos_9_27	56.4136	-37.5434	T_NK
CD34pos_9_33	51.1282	15.7182	T_NK
CD34pos_9_55	-13.1431	-11.6744	Central_venous_LSECs
CD34pos_9_57	-17.2906	-18.818	Central_venous_LSECs
CD34pos_9_59	-9.51704	-21.7	Macrophage
CD34pos_9_61	16.748	31.5277	Cholangiocytes
CD34pos_9_68	-12.2331	-12.2439	Macrophage
CD34pos_9_70	12.4869	-72.3431	B_cells
CD34pos_9_71	-50.9393	36.0446	Hepatocytes
CD34pos_9_78	-13.4779	-29.6806	Macrophage
CD45_NPC_P5_10_59	21.6248	25.5269	Macrophage
CD45_NPC_P5_10_106	20.0206	21.0989	Macrophage
CD45_NPC_P5_10_108	8.32267	15.1259	T_NK
CD45_NPC_P5_10_112	28.3421	-28.9648	T_NK
CD45_NPC_P5_10_113	15.7865	27.3184	Cholangiocytes
CD45_NPC_P5_10_120	54.6136	25.0108	T_NK
CD45_NPC_P5_10_125	41.8795	12.6275	T_NK
CD45_NPC_P5_10_136	4.40521	-50.5121	Macrophage
CD45_NPC_P5_10_137	21.0795	32.7085	Cholangiocytes
CD45_NPC_P5_10_143	8.2027	2.60958	T_NK
CD45_NPC_P5_10_151	22.871	-11.1475	T_NK
CD45_NPC_P5_10_166	20.9681	32.3322	T_NK
CD45_NPC_P5_10_170	58.2972	-44.9501	T_NK
CD45_NPC_P5_10_173	59.2714	-43.7373	T_NK
CD45_NPC_P5_10_175	4.60222	29.9526	Macrophage
CD45_NPC_P5_10_177	56.534	-46.3738	T_NK
CD45_NPC_P5_10_184	22.8816	26.602	Macrophage
CD45_NPC_P5_11_7	-0.518837	-53.7597	Macrophage
CD45_NPC_P5_11_13	26.5076	11.7927	T_NK
CD45_NPC_P5_11_14	25.0496	29.0039	T_NK
CD45_NPC_P5_11_17	48.8961	27.5469	T_NK
CD45_NPC_P5_11_22	34.7238	-2.77961	T_NK
CD45_NPC_P5_11_25	20.2301	15.6964	T_NK
CD45_NPC_P5_11_29	12.992	17.5495	T_NK
CD45_NPC_P5_11_31	49.1813	-1.58554	T_NK
CD45_NPC_P5_11_32	27.911	13.3951	T_NK
CD45_NPC_P5_11_33	13.6728	8.73716	T_NK
CD45_NPC_P5_11_36	33.3706	34.9026	T_NK
CD45_NPC_P5_11_38	-10.4945	-17.8187	T_NK
CD45_NPC_P5_11_56	3.51237	-38.0613	Macrophage
CD45_NPC_P5_11_57	-2.17782	-86.9226	B_cells
CD45_NPC_P5_11_59	33.4652	35.7939	T_NK
CD45_NPC_P5_11_60	72.3914	-9.90493	T_NK
CD45_NPC_P5_11_62	55.4087	3.70864	T_NK
CD45_NPC_P5_11_63	-18.7566	-26.9237	T_NK
CD45_NPC_P5_11_64	33.6686	33.9141	T_NK
CD45_NPC_P5_11_70	32.6401	22.5778	T_NK
CD45_NPC_P5_11_74	36.7981	27.5803	T_NK
CD45_NPC_P5_11_78	69.0208	-33.9088	T_NK
CD45_NPC_P5_11_90	37.2573	27.3987	T_NK
CD45_NPC_P5_11_93	52.8137	-32.9162	T_NK
CD45_NPC_P5_11_96	50.6185	-15.6272	T_NK
CD45_NPC_P5_12_101	32.9969	14.5608	T_NK
CD45_NPC_P5_12_110	33.0105	14.5342	T_NK
CD45_NPC_P5_12_113	24.1225	8.93158	Cholangiocytes
CD45_NPC_P5_12_125	32.2459	14.5031	T_NK
CD45_NPC_P5_12_128	33.7754	-34.1727	T_NK
CD45_NPC_P5_12_129	35.817	-25.96	T_NK
CD45_NPC_P5_12_134	53.4385	16.4178	T_NK
CD45_NPC_P5_12_136	25.6471	12.6201	T_NK
CD45_NPC_P5_12_137	42.3214	-1.6361	T_NK
CD45_NPC_P5_12_141	24.3827	19.8361	T_NK
CD45_NPC_P5_12_142	26.3952	25.4623	T_NK
CD45_NPC_P5_12_145	33.7274	26.5164	T_NK
CD45_NPC_P5_12_150	30.6804	13.8064	T_NK
CD45_NPC_P5_12_158	23.8622	19.6589	T_NK
CD45_NPC_P5_12_166	37.242	20.7637	T_NK
CD45_NPC_P5_12_170	55.9264	23.3332	T_NK
CD45_NPC_P5_12_171	24.0243	31.9432	T_NK
CD45_NPC_P5_12_179	32.4015	26.3393	T_NK
CD45_NPC_P5_12_180	35.3297	26.0991	T_NK
CD45_NPC_P5_12_184	64.2612	-28.2144	T_NK
CD45_NPC_P5_12_185	35.4553	18.47	T_NK
CD45_NPC_P5_12_187	26.3893	25.3801	T_NK
CD45_NPC_P5_12_191	49.4445	-12.0749	T_NK
CD45_NPC_P5_12_192	48.334	15.2913	T_NK
CD45_NPC_P5_9_24	22.8286	-11.2096	T_NK
CD45_NPC_P5_9_42	51.7835	18.8432	T_NK
CD45_NPC_P5_9_47	24.131	12.5951	T_NK
CD45_NPC_P5_9_54	22.8973	29.1245	T_NK
CD45_NPC_P5_9_70	43.0826	-2.63162	T_NK
CD45_NPC_P5_9_80	6.43588	-6.45143	T_NK
CD45_NPC_P5_9_85	45.2839	-14.9367	T_NK
CD45_NPC_P5_9_88	65.6598	-8.90779	T_NK
CD45negASGR1neg315_10_108	0.583528	-87.0454	B_cells
CD45negASGR1neg315_10_116	-69.4795	-1.89143	Hepatocytes
CD45negASGR1neg315_10_123	-43.8934	-28.8555	Cholangiocytes
CD45negASGR1neg315_10_142	12.55	-72.3501	B_cells
CD45negASGR1neg315_10_145	-70.8603	-2.50799	Hepatocytes
CD45negASGR1neg315_10_151	-46.0217	-30.598	Cholangiocytes
CD45negASGR1neg315_10_154	-50.1908	-36.1907	Cholangiocytes
CD45negASGR1neg315_11_42	14.4674	-67.2212	B_cells
CD45negASGR1neg315_7_8	3.96229	28.9365	Macrophage
CD45negASGR1neg315_7_9	-38.4321	-26.8099	Cholangiocytes
CD45negASGR1neg315_7_14	-68.2825	-4.30671	Hepatocytes
CD45negASGR1neg315_7_15	23.2064	1.33023	T_NK
CD45negASGR1neg315_7_29	-1.28417	-91.5844	B_cells
CD45negASGR1neg315_7_33	23.3734	-1.02677	T_NK
CD45negASGR1neg315_7_90	28.979	20.5746	T_NK
CD45negASGR1neg315_8_103	27.5744	-1.01576	T_NK
CD45negASGR1neg315_8_105	-0.293785	-11.4859	Hepatocytes
CD45negASGR1neg315_8_153	28.6792	-6.19703	T_NK
CD45negASGR1neg315_8_170	-66.4953	7.36122	Hepatocytes
CD45negASGR1neg315_9_12	-65.2106	4.30195	Hepatocytes
CD45negASGR1neg315_9_75	-39.3924	-15.1626	Cholangiocytes
CD45negASGR1negBio_5_6	-27.8132	-44.4727	Hepatocytes
CD45negASGR1negBio_5_13	-54.0281	32.4992	Hepatocytes
CD45negASGR1negBio_5_20	-51.6057	35.6237	Hepatocytes
CD45negASGR1negBio_5_28	14.3967	-62.06	B_cells
CD45negASGR1negBio_5_43	-1.31728	-90.6304	B_cells
CD45negASGR1negBio_5_50	-20.1226	-56.8509	Cholangiocytes
CD45negASGR1negBio_5_61	-26.7296	-40.4814	Hepatocytes
CD45negASGR1negBio_5_64	-4.86114	-72.9623	T_NK
CD45negASGR1negBio_5_70	-27.3073	-40.5889	Hepatocytes
CD45negASGR1negBio_6_43	-6.50983	-78.2117	B_cells
CD45negASGR1negBio_6_111	-17.2397	-22.9618	B_cells
CD45negASGR1negBio_6_123	-29.097	-38.3922	Cholangiocytes
CD45negASGR1negBio_6_130	-3.47756	-73.5741	B_cells
CD45negASGR1negBio_6_139	-28.1427	-40.1991	Hepatocytes
CD45negASGR1negBio_6_154	-4.81892	-82.4929	B_cells
CD45negASGR1negBio_6_179	17.9607	-65.2005	B_cells
CD45negASGR1negBio_6_187	-5.62078	-84.0838	B_cells
CD45negASGR1negBio_6_190	-49.346	42.5707	Hepatocytes
CD45negASGR1negBio_7_7	-71.1603	3.51042	Hepatocytes
CD45negASGR1negBio_7_10	-53.7454	-44.3555	Cholangiocytes
CD45negASGR1negBio_7_11	4.01441	28.9717	Macrophage
CD45negASGR1negBio_7_35	-55.8688	40.5568	Hepatocytes
CD45negASGR1negBio_7_57	-21.4451	-32.1912	Hepatocytes
CD45negASGR1negBio_7_64	-3.41774	-84.2499	B_cells
CD45negASGR1negBio_7_66	-74.7943	14.2882	Hepatocytes
CD45negASGR1negBio_7_82	18.1981	-64.2579	B_cells
CD45negASGR1negBio_8_112	-7.38168	-75.7536	T_NK
CD45negASGR1negBio_8_117	-17.2635	-22.9548	B_cells
CD45negASGR1negBio_8_173	-22.334	-17.503	Cholangiocytes
CD45pos315_13_1	8.65343	-44.9756	Macrophage
CD45pos315_13_2	57.6199	-33.0343	T_NK
CD45pos315_13_3	61.8113	-10.1875	T_NK
CD45pos315_13_4	48.6545	1.48452	T_NK
CD45pos315_13_6	64.6976	-29.1441	T_NK
CD45pos315_13_10	48.8648	2.17997	T_NK
CD45pos315_13_11	40.7108	-22.5852	T_NK
CD45pos315_13_12	25.0393	29.9798	T_NK
CD45pos315_13_13	45.1256	-2.3027	T_NK
CD45pos315_13_14	43.7119	-35.8739	T_NK
CD45pos315_13_15	24.4506	-21.0924	T_NK
CD45pos315_13_17	52.2637	-11.8463	T_NK
CD45pos315_13_18	20.0258	22.1769	T_NK
CD45pos315_13_20	62.7122	-11.5695	T_NK
CD45pos315_13_22	35.6135	-8.90547	T_NK
CD45pos315_13_23	25.4773	-25.4546	T_NK
CD45pos315_13_24	59.2183	10.0551	T_NK
CD45pos315_13_25	45.7792	-41.1835	T_NK
CD45pos315_13_27	49.8736	19.1622	T_NK
CD45pos315_13_28	30.3464	39.2445	T_NK
CD45pos315_13_30	45.404	-16.0599	T_NK
CD45pos315_13_31	65.4444	2.47127	T_NK
CD45pos315_13_33	64.256	-17.187	T_NK
CD45pos315_13_35	53.8898	12.7793	T_NK
CD45pos315_13_37	40.4768	-15.1976	T_NK
CD45pos315_13_38	6.35283	28.6512	Macrophage
CD45pos315_13_39	31.808	-34.3277	T_NK
CD45pos315_13_40	62.7809	-33.3419	T_NK
CD45pos315_13_42	43.2554	22.0979	T_NK
CD45pos315_13_43	62.0197	-7.63412	T_NK
CD45pos315_13_44	14.1447	-62.2139	T_NK
CD45pos315_13_45	51.5114	18.1572	T_NK
CD45pos315_13_49	53.0721	14.2242	T_NK
CD45pos315_13_50	23.5929	-11.3661	T_NK
CD45pos315_13_52	64.2193	-0.22979	T_NK
CD45pos315_13_53	55.6974	14.9609	T_NK
CD45pos315_13_54	64.0039	-12.9539	T_NK
CD45pos315_13_55	28.9807	-39.525	T_NK
CD45pos315_13_57	64.5965	2.44382	T_NK
CD45pos315_13_59	53.6754	-8.49091	T_NK
CD45pos315_13_62	44.0492	-35.8234	T_NK
CD45pos315_13_63	25.0591	-46.615	T_NK
CD45pos315_13_65	45.3267	-1.78023	T_NK
CD45pos315_13_67	47.3252	-13.1885	T_NK
CD45pos315_13_68	68.4124	-10.8564	T_NK
CD45pos315_13_69	67.859	-10.9865	T_NK
CD45pos315_13_70	52.5179	0.512654	T_NK
CD45pos315_13_72	65.0742	-12.3746	T_NK
CD45pos315_13_73	54.4073	-28.0278	T_NK
CD45pos315_13_75	64.6878	-6.92983	T_NK
CD45pos315_13_76	61.933	-23.155	T_NK
CD45pos315_13_77	-6.05604	-19.6504	Macrophage
CD45pos315_13_78	29.5679	-23.617	T_NK
CD45pos315_13_79	32.1898	15.6428	T_NK
CD45pos315_13_82	51.0336	18.9699	T_NK
CD45pos315_13_84	56.1939	-49.6213	T_NK
CD45pos315_13_87	32.1509	-34.1174	T_NK
CD45pos315_13_88	63.8659	-30.1903	T_NK
CD45pos315_13_89	25.0631	-11.8439	T_NK
CD45pos315_13_90	45.6677	-17.7272	T_NK
CD45pos315_13_92	47.2536	-4.30387	T_NK
CD45pos315_13_93	44.6334	0.364679	T_NK
CD45pos315_13_94	30.4158	39.2657	T_NK
CD45pos315_13_95	20.6591	14.9917	T_NK
CD45pos315_13_96	35.1031	-39.4561	T_NK
CD45pos315_14_99	67.8056	-9.98132	T_NK
CD45pos315_14_101	28.4011	13.2395	T_NK
CD45pos315_14_102	26.9275	25.6972	T_NK
CD45pos315_14_103	30.2439	12.3339	T_NK
CD45pos315_14_105	53.6109	-32.2584	T_NK
CD45pos315_14_106	55.5299	-23.2317	T_NK
CD45pos315_14_107	45.4993	-22.8696	T_NK
CD45pos315_14_108	22.6968	-0.755651	T_NK
CD45pos315_14_112	27.4816	-35.7393	T_NK
CD45pos315_14_113	27.0284	-21.5079	T_NK
CD45pos315_14_114	68.1253	-1.66414	T_NK
CD45pos315_14_116	54.8924	17.9565	T_NK
CD45pos315_14_118	30.3463	12.5068	T_NK
CD45pos315_14_119	56.0473	12.5042	T_NK
CD45pos315_14_121	52.3568	11.6887	T_NK
CD45pos315_14_122	66.3799	-34.6513	T_NK
CD45pos315_14_124	52.8313	17.4445	T_NK
CD45pos315_14_127	40.8747	-17.5638	T_NK
CD45pos315_14_128	43.6518	-16.912	T_NK
CD45pos315_14_131	51.0896	16.8255	T_NK
CD45pos315_14_133	23.022	29.912	T_NK
CD45pos315_14_134	47.171	1.99552	T_NK
CD45pos315_14_135	44.1251	16.8018	T_NK
CD45pos315_14_137	62.2681	-11.5612	T_NK
CD45pos315_14_138	47.0211	-10.3783	T_NK
CD45pos315_14_139	70.7056	-28.0925	T_NK
CD45pos315_14_140	48.2972	3.48691	T_NK
CD45pos315_14_142	63.5297	-44.0396	T_NK
CD45pos315_14_145	61.3051	-49.5635	T_NK
CD45pos315_14_147	41.5204	-0.447207	T_NK
CD45pos315_14_148	25.5848	10.4877	T_NK
CD45pos315_14_149	53.6338	17.6179	T_NK
CD45pos315_14_150	43.2833	14.326	T_NK
CD45pos315_14_151	43.4137	17.4657	T_NK
CD45pos315_14_152	26.3832	-25.585	T_NK
CD45pos315_14_153	-11.682	-21.9064	Macrophage
CD45pos315_14_156	31.1531	16.6162	T_NK
CD45pos315_14_157	4.74558	-38.8881	Macrophage
CD45pos315_14_158	65.5725	-5.47438	T_NK
CD45pos315_14_159	44.3488	0.814114	T_NK
CD45pos315_14_161	49.7856	0.0260761	T_NK
CD45pos315_14_163	54.4208	13.893	T_NK
CD45pos315_14_164	46.4942	7.26912	T_NK
CD45pos315_14_166	35.4524	-14.8684	T_NK
CD45pos315_14_167	28.9136	-7.38809	T_NK
CD45pos315_14_168	44.081	-19.0362	T_NK
CD45pos315_14_170	65.6582	-7.71396	T_NK
CD45pos315_14_172	22.5176	29.2987	T_NK
CD45pos315_14_175	46.0711	-13.1292	T_NK
CD45pos315_14_177	53.3881	-13.3571	T_NK
CD45pos315_14_178	53.996	-15.4319	T_NK
CD45pos315_14_179	54.862	-2.92975	T_NK
CD45pos315_14_180	30.2206	10.5897	T_NK
CD45pos315_14_181	67.6416	-2.14885	T_NK
CD45pos315_14_182	51.1614	13.0471	T_NK
CD45pos315_14_183	64.6532	3.08041	T_NK
CD45pos315_14_186	63.0845	-16.4375	T_NK
CD45pos315_14_187	29.2275	-5.65293	T_NK
CD45pos315_14_188	46.0594	15.6746	T_NK
CD45pos315_14_189	67.9111	-4.20081	T_NK
CD45pos315_14_190	61.0585	-17.8476	T_NK
CD45pos315_15_1	48.5365	6.50357	T_NK
CD45pos315_15_2	53.2722	-30.3787	T_NK
CD45pos315_15_3	50.8665	18.9335	T_NK
CD45pos315_15_4	51.3324	-9.2394	T_NK
CD45pos315_15_5	28.9053	-37.1823	T_NK
CD45pos315_15_6	63.4849	-42.2678	T_NK
CD45pos315_15_7	52.1799	-33.7959	T_NK
CD45pos315_15_11	36.9827	-15.2822	T_NK
CD45pos315_15_13	31.195	10.4371	T_NK
CD45pos315_15_14	29.8206	-9.03857	T_NK
CD45pos315_15_18	56.6992	18.5686	T_NK
CD45pos315_15_19	29.7927	-23.5722	T_NK
CD45pos315_15_20	41.3233	-18.241	T_NK
CD45pos315_15_23	39.0864	-16.0311	T_NK
CD45pos315_15_24	31.646	-34.223	T_NK
CD45pos315_15_25	50.9708	16.9759	T_NK
CD45pos315_15_26	57.7691	-5.45958	T_NK
CD45pos315_15_29	-12.3899	-21.5129	Macrophage
CD45pos315_15_30	46.4155	6.14296	T_NK
CD45pos315_15_31	43.2008	0.574152	T_NK
CD45pos315_15_32	30.898	-46.2222	T_NK
CD45pos315_15_33	47.764	-15.1456	T_NK
CD45pos315_15_34	51.0107	13.1762	T_NK
CD45pos315_15_36	-21.7462	-33.8943	Macrophage
CD45pos315_15_38	48.7694	-18.8214	T_NK
CD45pos315_15_42	43.1145	21.992	T_NK
CD45pos315_15_43	53.919	14.0406	T_NK
CD45pos315_15_44	47.6321	-4.34009	T_NK
CD45pos315_15_45	45.4131	-24.7034	T_NK
CD45pos315_15_46	31.365	7.85892	T_NK
CD45pos315_15_47	54.8007	-20.3766	T_NK
CD45pos315_15_48	54.2228	-6.7949	T_NK
CD45pos315_15_50	44.9266	8.2002	T_NK
CD45pos315_15_51	50.9941	20.0636	T_NK
CD45pos315_15_53	52.3265	6.9144	T_NK
CD45pos315_15_55	23.6041	-20.6814	T_NK
CD45pos315_15_56	49.4941	8.79073	T_NK
CD45pos315_15_58	31.0708	10.3245	T_NK
CD45pos315_15_59	48.7363	7.68829	T_NK
CD45pos315_15_60	37.1214	-6.5884	T_NK
CD45pos315_15_61	25.1867	-33.3521	T_NK
CD45pos315_15_62	45.8731	6.20648	T_NK
CD45pos315_15_65	28.1125	-6.5236	T_NK
CD45pos315_15_66	53.892	-12.326	T_NK
CD45pos315_15_67	52.6332	17.4951	T_NK
CD45pos315_15_70	35.8359	-5.81946	T_NK
CD45pos315_15_71	46.4643	8.63436	T_NK
CD45pos315_15_72	28.6899	-36.8284	T_NK
CD45pos315_15_73	29.0972	-6.14454	T_NK
CD45pos315_15_75	58.389	12.3822	T_NK
CD45pos315_15_76	10.6824	-48.8843	Macrophage
CD45pos315_15_77	47.9741	-34.555	T_NK
CD45pos315_15_78	35.6007	-15.2334	T_NK
CD45pos315_15_79	23.9285	-19.2524	T_NK
CD45pos315_15_82	32.3457	13.9975	T_NK
CD45pos315_15_84	30.105	-10.1647	T_NK
CD45pos315_15_86	54.8874	-22.0934	T_NK
CD45pos315_15_87	63.98	-35.4294	T_NK
CD45pos315_15_89	43.7372	10.9302	T_NK
CD45pos315_15_90	61.1926	8.45557	T_NK
CD45pos315_15_91	70.8207	-27.8786	T_NK
CD45pos315_15_92	24.218	12.4	T_NK
CD45pos315_15_93	28.6763	-21.2723	T_NK
CD45pos315_15_94	65.4523	5.23916	T_NK
CD45pos315_15_95	27.1609	-23.6694	T_NK
CD45pos315_15_96	25.5926	-36.1072	T_NK
CD45pos315_16_97	45.7722	-27.2721	T_NK
CD45pos315_16_100	56.4632	7.77193	T_NK
CD45pos315_16_101	48.1034	10.9434	T_NK
CD45pos315_16_102	53.125	-12.8395	T_NK
CD45pos315_16_104	42.8978	-45.8541	T_NK
CD45pos315_16_105	53.8953	-23.2937	T_NK
CD45pos315_16_107	45.3754	-1.89685	T_NK
CD45pos315_16_113	6.67401	-46.6089	Macrophage
CD45pos315_16_115	30.5116	9.59137	T_NK
CD45pos315_16_116	46.5774	8.23327	T_NK
CD45pos315_16_117	48.1291	0.0910364	T_NK
CD45pos315_16_118	48.0603	-32.9738	T_NK
CD45pos315_16_119	28.9256	-17.2367	T_NK
CD45pos315_16_120	56.1139	8.57807	T_NK
CD45pos315_16_121	25.333	-26.9481	T_NK
CD45pos315_16_122	57.9603	-15.2194	T_NK
CD45pos315_16_123	45.113	2.51209	T_NK
CD45pos315_16_124	47.8194	-10.4117	T_NK
CD45pos315_16_125	30.5358	-11.3833	T_NK
CD45pos315_16_126	40.3308	-18.396	T_NK
CD45pos315_16_128	63.1792	-17.0461	T_NK
CD45pos315_16_130	41.4253	-23.3554	T_NK
CD45pos315_16_131	13.8325	2.17269	T_NK
CD45pos315_16_132	45.8614	-3.82651	T_NK
CD45pos315_16_134	50.385	-7.62701	T_NK
CD45pos315_16_139	47.7659	3.31456	T_NK
CD45pos315_16_140	35.6657	-15.1401	T_NK
CD45pos315_16_142	48.052	-40.7117	T_NK
CD45pos315_16_143	44.2247	0.824548	T_NK
CD45pos315_16_144	36.3799	-5.57714	T_NK
CD45pos315_16_145	-16.4288	-5.98409	T_NK
CD45pos315_16_147	31.2927	17.0946	T_NK
CD45pos315_16_149	49.4049	-10.2031	T_NK
CD45pos315_16_151	35.8701	-45.0236	T_NK
CD45pos315_16_152	70.4476	-27.4161	T_NK
CD45pos315_16_153	46.6271	8.54936	T_NK
CD45pos315_16_154	32.4103	-31.0251	T_NK
CD45pos315_16_155	46.5811	7.34195	T_NK
CD45pos315_16_156	55.0457	-29.3502	T_NK
CD45pos315_16_157	36.5019	-6.28013	T_NK
CD45pos315_16_158	26.6558	-22.3478	T_NK
CD45pos315_16_159	45.5512	15.3183	T_NK
CD45pos315_16_161	43.8686	11.0302	T_NK
CD45pos315_16_163	59.1295	-26.2697	T_NK
CD45pos315_16_165	31.1776	9.81895	T_NK
CD45pos315_16_166	41.6632	-23.3808	T_NK
CD45pos315_16_167	23.6071	-47.7162	T_NK
CD45pos315_16_168	2.76428	4.98311	T_NK
CD45pos315_16_170	57.9832	22.3335	T_NK
CD45pos315_16_172	9.04575	-46.5537	Macrophage
CD45pos315_16_173	48.254	-2.67734	T_NK
CD45pos315_16_174	50.1929	-29.0726	T_NK
CD45pos315_16_176	30.991	16.84	T_NK
CD45pos315_16_177	65.3676	5.09006	T_NK
CD45pos315_16_179	47.7556	-0.375358	T_NK
CD45pos315_16_180	35.6979	-15.2286	T_NK
CD45pos315_16_181	52.7641	-13.6484	T_NK
CD45pos315_16_182	50.6194	-34.19	T_NK
CD45pos315_16_185	54.782	-23.229	T_NK
CD45pos315_16_186	53.9662	-0.592095	T_NK
CD45pos315_16_187	51.7829	-39.7344	T_NK
CD45pos315_16_188	56.6627	-34.2798	T_NK
CD45pos315_16_191	65.7776	-10.0875	T_NK
CD45pos325_5_1	29.0476	-33.3938	T_NK
CD45pos325_5_2	-3.28307	-26.904	T_NK
CD45pos325_5_5	31.5781	-48.8228	T_NK
CD45pos325_5_6	43.8748	-29.879	T_NK
CD45pos325_5_7	27.8201	-52.0971	T_NK
CD45pos325_5_10	25.4939	-37.9233	T_NK
CD45pos325_5_11	-8.57001	-45.639	Macrophage
CD45pos325_5_12	30.1738	-54.5844	T_NK
CD45pos325_5_13	29.9098	-16.5256	T_NK
CD45pos325_5_14	26.9473	-42.5031	T_NK
CD45pos325_5_15	25.5074	-36.3069	T_NK
CD45pos325_5_16	26.773	-30.5496	T_NK
CD45pos325_5_18	34.9199	-31.8878	T_NK
CD45pos325_5_19	25.379	11.17	T_NK
CD45pos325_5_20	28.9926	-15.9561	T_NK
CD45pos325_5_21	54.0038	10.4271	T_NK
CD45pos325_5_23	34.3747	-42.9528	T_NK
CD45pos325_5_25	22.981	-13.8051	T_NK
CD45pos325_5_26	27.4204	24.8034	T_NK
CD45pos325_5_27	44.545	23.9007	T_NK
CD45pos325_5_29	-10.0967	-43.934	Macrophage
CD45pos325_5_30	57.368	-18.6202	T_NK
CD45pos325_5_31	38.298	-30.7104	T_NK
CD45pos325_5_32	65.8014	-13.2446	T_NK
CD45pos325_5_33	-9.97839	-17.125	T_NK
CD45pos325_5_34	31.4742	-42.0867	T_NK
CD45pos325_5_35	37.9811	-14.9133	T_NK
CD45pos325_5_36	46.8726	-18.0393	T_NK
CD45pos325_5_37	58.0905	-15.0323	T_NK
CD45pos325_5_39	37.6466	-15.4394	T_NK
CD45pos325_5_40	49.1791	1.35395	T_NK
CD45pos325_5_41	-5.65393	-73.6021	T_NK
CD45pos325_5_42	6.55651	-50.3721	Macrophage
CD45pos325_5_43	-17.4243	-25.5487	T_NK
CD45pos325_5_44	33.7898	-35.9848	T_NK
CD45pos325_5_45	44.2686	-29.6348	T_NK
CD45pos325_5_47	-18.5664	-28.3103	T_NK
CD45pos325_5_50	-11.9878	-25.945	Macrophage
CD45pos325_5_51	56.0424	-49.3813	T_NK
CD45pos325_5_53	35.7817	-49.1241	T_NK
CD45pos325_5_54	2.73321	63.1873	Hepatocytes
CD45pos325_5_56	41.9439	-46.1917	T_NK
CD45pos325_5_60	35.0967	-21.7231	T_NK
CD45pos325_5_61	53.3713	-7.52056	T_NK
CD45pos325_5_62	18.2745	21.9972	T_NK
CD45pos325_5_64	62.1165	-7.17483	T_NK
CD45pos325_5_65	14.1828	-6.01424	T_NK
CD45pos325_5_66	46.4997	-14.9577	T_NK
CD45pos325_5_67	21.7242	-11.0481	T_NK
CD45pos325_5_68	45.9978	11.1706	T_NK
CD45pos325_5_69	53.562	-47.7081	T_NK
CD45pos325_5_70	43.7558	-35.9587	T_NK
CD45pos325_5_71	48.184	-22.7877	T_NK
CD45pos325_5_72	-11.9357	-14.3528	T_NK
CD45pos325_5_74	24.8942	-33.4315	T_NK
CD45pos325_5_75	53.9036	-48.7089	T_NK
CD45pos325_5_77	33.0811	-41.2744	T_NK
CD45pos325_5_78	42.3688	-31.2441	T_NK
CD45pos325_5_80	42.8519	-42.369	T_NK
CD45pos325_5_81	8.61053	13.8544	T_NK
CD45pos325_5_82	3.08231	-49.441	Macrophage
CD45pos325_5_83	63.5041	-41.9091	T_NK
CD45pos325_5_84	30.7364	-54.9399	T_NK
CD45pos325_5_85	33.4271	-25.8926	T_NK
CD45pos325_5_86	6.83198	-6.28139	T_NK
CD45pos325_5_89	-12.2035	-20.9172	Macrophage
CD45pos325_5_93	32.9919	-34.9312	T_NK
CD45pos325_5_94	43.5827	-3.73227	T_NK
CD45pos325_5_95	41.7608	-20.8811	T_NK
CD45pos325_5_96	26.567	-46.9243	T_NK
CD45pos325_6_97	37.9934	26.197	T_NK
CD45pos325_6_99	22.1997	10.6263	T_NK
CD45pos325_6_100	37.2107	-7.0161	T_NK
CD45pos325_6_101	36.3758	12.4233	T_NK
CD45pos325_6_102	12.0134	-34.2757	T_NK
CD45pos325_6_103	37.6007	-44.1929	T_NK
CD45pos325_6_104	30.6099	-52.6195	T_NK
CD45pos325_6_107	37.3063	-0.680989	T_NK
CD45pos325_6_109	-19.1688	-27.5713	T_NK
CD45pos325_6_110	57.5523	-48.249	T_NK
CD45pos325_6_111	37.9144	-47.0721	T_NK
CD45pos325_6_112	-18.1825	-27.3839	T_NK
CD45pos325_6_113	10.8714	-44.9225	Macrophage
CD45pos325_6_114	26.1394	-36.63	T_NK
CD45pos325_6_115	35.3785	-21.2936	T_NK
CD45pos325_6_116	26.4789	-27.9778	T_NK
CD45pos325_6_117	-13.4326	-29.9098	T_NK
CD45pos325_6_119	51.5471	-7.65211	T_NK
CD45pos325_6_120	-0.196174	-53.2909	Macrophage
CD45pos325_6_121	15.4574	20.3955	T_NK
CD45pos325_6_122	27.5285	-52.1527	T_NK
CD45pos325_6_124	69.1677	-26.4439	T_NK
CD45pos325_6_125	-23.8683	-36.5249	Macrophage
CD45pos325_6_126	55.8871	-5.59559	T_NK
CD45pos325_6_127	25.6993	-26.4277	T_NK
CD45pos325_6_128	26.5344	-24.6282	T_NK
CD45pos325_6_129	57.5125	21.7649	T_NK
CD45pos325_6_130	-12.6198	-15.5477	T_NK
CD45pos325_6_131	38.5612	-18.099	T_NK
CD45pos325_6_132	39.2387	-33.5486	T_NK
CD45pos325_6_133	37.0619	0.64582	T_NK
CD45pos325_6_134	30.9005	-31.8448	T_NK
CD45pos325_6_136	46.5441	-30.3976	T_NK
CD45pos325_6_141	44.7037	-37.8374	T_NK
CD45pos325_6_142	48.5983	-44.5414	T_NK
CD45pos325_6_143	27.498	-33.4302	T_NK
CD45pos325_6_144	27.601	-51.3875	T_NK
CD45pos325_6_146	62.2818	-11.3494	T_NK
CD45pos325_6_147	30.6593	10.1378	T_NK
CD45pos325_6_148	34.7585	-13.9081	T_NK
CD45pos325_6_149	47.0436	22.0718	T_NK
CD45pos325_6_151	31.4665	-32.1759	T_NK
CD45pos325_6_154	56.2416	-23.8823	T_NK
CD45pos325_6_155	24.1643	-25.3526	T_NK
CD45pos325_6_156	26.103	-26.521	T_NK
CD45pos325_6_158	35.2644	-21.8795	T_NK
CD45pos325_6_160	44.6324	-28.8782	T_NK
CD45pos325_6_161	28.1728	-47.9811	T_NK
CD45pos325_6_162	60.5303	-34.6964	T_NK
CD45pos325_6_163	55.9414	-23.8805	T_NK
CD45pos325_6_164	40.409	-1.10263	T_NK
CD45pos325_6_165	5.98431	16.4747	T_NK
CD45pos325_6_167	-18.7097	-26.6977	T_NK
CD45pos325_6_168	30.028	-41.8561	T_NK
CD45pos325_6_169	42.7223	-38.187	T_NK
CD45pos325_6_170	40.8803	-24.3523	T_NK
CD45pos325_6_172	30.6171	-36.4059	T_NK
CD45pos325_6_174	24.6242	-11.7496	T_NK
CD45pos325_6_176	31.1624	-11.6547	T_NK
CD45pos325_6_177	27.7115	-13.7587	T_NK
CD45pos325_6_178	-17.2766	-26.2767	T_NK
CD45pos325_6_179	15.3536	19.7832	T_NK
CD45pos325_6_180	-20.209	-28.8631	Macrophage
CD45pos325_6_183	49.2303	-18.5727	T_NK
CD45pos325_6_185	8.34631	1.558	T_NK
CD45pos325_6_186	-14.4865	-26.7271	Macrophage
CD45pos325_6_190	24.1286	-24.9874	T_NK
CD45pos325_7_1	-19.4751	-28.044	T_NK
CD45pos325_7_2	35.6848	-49.9618	T_NK
CD45pos325_7_3	25.8508	-19.2316	T_NK
CD45pos325_7_4	56.8258	-45.8463	T_NK
CD45pos325_7_5	31.7712	-38.5693	T_NK
CD45pos325_7_7	64.4163	3.36225	T_NK
CD45pos325_7_8	30.5858	-52.6776	T_NK
CD45pos325_7_9	56.7201	-42.247	T_NK
CD45pos325_7_13	27.622	-32.924	T_NK
CD45pos325_7_14	48.1526	-44.6983	T_NK
CD45pos325_7_15	33.6544	-24.5856	T_NK
CD45pos325_7_16	31.6873	-22.4724	T_NK
CD45pos325_7_17	52.806	-49.7346	T_NK
CD45pos325_7_18	32.3381	-29.702	T_NK
CD45pos325_7_19	55.9371	-50.568	T_NK
CD45pos325_7_20	36.3168	-52.4453	T_NK
CD45pos325_7_21	41.9847	-37.9061	T_NK
CD45pos325_7_22	49.1534	-45.1565	T_NK
CD45pos325_7_23	32.6217	-28.9664	T_NK
CD45pos325_7_24	-12.5169	-17.4979	T_NK
CD45pos325_7_26	49.002	-7.50435	T_NK
CD45pos325_7_27	39.5757	-42.1701	T_NK
CD45pos325_7_28	72.5633	-16.1529	T_NK
CD45pos325_7_29	43.5001	-38.8951	T_NK
CD45pos325_7_30	10.154	17.7072	T_NK
CD45pos325_7_31	39.9632	-18.5849	T_NK
CD45pos325_7_32	14.3928	-67.0367	B_cells
CD45pos325_7_34	50.6626	-41.3102	T_NK
CD45pos325_7_36	32.3275	-57.6386	T_NK
CD45pos325_7_37	38.0949	-47.4315	T_NK
CD45pos325_7_40	22.553	25.2747	Macrophage
CD45pos325_7_41	-3.48476	-72.234	T_NK
CD45pos325_7_42	59.1419	5.40809	T_NK
CD45pos325_7_43	22.9791	-47.5954	T_NK
CD45pos325_7_45	58.7176	-33.7825	T_NK
CD45pos325_7_49	38.6118	-39.506	T_NK
CD45pos325_7_50	16.7296	27.3605	T_NK
CD45pos325_7_52	55.2318	-48.2082	T_NK
CD45pos325_7_53	-8.15921	-46.6649	Macrophage
CD45pos325_7_54	37.3801	-50.8954	T_NK
CD45pos325_7_55	31.5819	-42.2734	T_NK
CD45pos325_7_56	24.2594	-11.2541	T_NK
CD45pos325_7_57	42.263	-24.0403	T_NK
CD45pos325_7_59	29.2967	-47.9219	T_NK
CD45pos325_7_60	53.7213	-46.9373	T_NK
CD45pos325_7_61	29.6343	-55.1709	T_NK
CD45pos325_7_62	30.3145	-36.8938	T_NK
CD45pos325_7_63	27.9806	-52.7111	T_NK
CD45pos325_7_64	22.197	23.9256	T_NK
CD45pos325_7_65	40.8977	-48.5636	T_NK
CD45pos325_7_66	72.5831	-25.2422	T_NK
CD45pos325_7_67	5.58811	8.23544	T_NK
CD45pos325_7_68	46.9467	-14.8718	T_NK
CD45pos325_7_69	52.0692	11.9103	T_NK
CD45pos325_7_71	21.4732	-10.9624	T_NK
CD45pos325_7_74	34.2443	-20.1332	T_NK
CD45pos325_7_76	54.0547	-41.5915	T_NK
CD45pos325_7_77	33.9462	-40.7819	T_NK
CD45pos325_7_79	32.1087	-56.2771	T_NK
CD45pos325_7_81	72.5553	-16.2911	T_NK
CD45pos325_7_82	27.6549	-23.5421	T_NK
CD45pos325_7_84	29.4334	-53.2303	T_NK
CD45pos325_7_86	45.8576	-39.4878	T_NK
CD45pos325_7_88	34.7058	-47.7468	T_NK
CD45pos325_7_90	40.5246	-48.9672	T_NK
CD45pos325_7_92	-18.382	-27.8723	T_NK
CD45pos325_7_95	31.7395	-48.5446	T_NK
CD45pos325_7_96	6.74952	-22.2411	T_NK
CD45pos325_8_97	32.2397	-56.2443	T_NK
CD45pos325_8_98	27.5358	-51.3727	T_NK
CD45pos325_8_100	27.6956	-28.502	T_NK
CD45pos325_8_104	27.8059	-53.4575	T_NK
CD45pos325_8_108	57.311	-17.2825	T_NK
CD45pos325_8_110	35.3563	-53.0361	T_NK
CD45pos325_8_113	-26.2345	36.7699	Hepatocytes
CD45pos325_8_114	7.54301	-14.8125	T_NK
CD45pos325_8_116	28.1447	-28.7673	T_NK
CD45pos325_8_117	35.1026	15.3627	T_NK
CD45pos325_8_122	-13.8987	-25.7683	Macrophage
CD45pos325_8_125	31.8741	-27.3881	T_NK
CD45pos325_8_128	30.8457	-49.9631	T_NK
CD45pos325_8_131	47.6963	-42.7312	T_NK
CD45pos325_8_133	26.46	25.8867	T_NK
CD45pos325_8_134	12.554	0.770502	T_NK
CD45pos325_8_136	69.1285	-0.563264	T_NK
CD45pos325_8_137	54.1011	-13.1213	T_NK
CD45pos325_8_138	13.665	8.72248	T_NK
CD45pos325_8_139	48.1099	-22.7891	T_NK
CD45pos325_8_140	19.2686	22.517	T_NK
CD45pos325_8_141	52.7264	0.520325	T_NK
CD45pos325_8_145	27.2753	-47.9663	T_NK
CD45pos325_8_146	34.1226	-34.0925	T_NK
CD45pos325_8_148	30.1328	-41.4759	T_NK
CD45pos325_8_151	41.7416	30.272	T_NK
CD45pos325_8_153	33.3171	-41.7032	T_NK
CD45pos325_8_154	10.044	-20.2648	T_NK
CD45pos325_8_155	25.4138	-21.9459	T_NK
CD45pos325_8_156	51.927	-40.7431	T_NK
CD45pos325_8_157	29.529	-40.5158	T_NK
CD45pos325_8_160	29.6568	-41.0805	T_NK
CD45pos325_8_162	58.6931	-43.8443	T_NK
CD45pos325_8_164	25.1838	-50.2062	T_NK
CD45pos325_8_165	33.6775	26.3147	T_NK
CD45pos325_8_170	33.983	-35.7727	T_NK
CD45pos325_8_171	48.9998	-5.81056	T_NK
CD45pos325_8_172	27.5245	-21.2991	T_NK
CD45pos325_8_173	22.8653	7.90223	T_NK
CD45pos325_8_174	35.4656	-52.1725	T_NK
CD45pos325_8_176	38.3456	-28.1611	T_NK
CD45pos325_8_177	12.5305	-16.1599	T_NK
CD45pos325_8_180	45.1981	6.37761	T_NK
CD45pos325_8_181	-11.3064	-15.7242	T_NK
CD45pos325_8_182	29.6342	-54.4112	T_NK
CD45pos325_8_183	45.2621	-25.4849	T_NK
CD45pos325_8_185	10.0275	-18.3098	T_NK
CD45pos325_8_186	51.1662	-22.7516	T_NK
CD45pos325_8_188	36.0054	-25.4535	T_NK
CD45pos325_8_192	31.3395	-36.9344	T_NK
CD45posfresh_5_1	54.5604	-36.5272	T_NK
CD45posfresh_5_2	47.8458	-36.5878	T_NK
CD45posfresh_5_3	58.0593	-49.6426	T_NK
CD45posfresh_5_4	68.2052	-26.2683	T_NK
CD45posfresh_5_5	-15.4513	-26.9612	T_NK
CD45posfresh_5_6	46.3058	-36.7549	T_NK
CD45posfresh_5_7	39.949	-20.7117	T_NK
CD45posfresh_5_8	53.0724	-39.0855	T_NK
CD45posfresh_5_10	47.8968	-42.764	T_NK
CD45posfresh_5_11	52.6377	-16.9807	T_NK
CD45posfresh_5_12	34.9289	-39.6798	T_NK
CD45posfresh_5_13	40.8446	-18.0753	T_NK
CD45posfresh_5_14	-50.7212	-34.8066	Cholangiocytes
CD45posfresh_5_15	53.2891	-37.7713	T_NK
CD45posfresh_5_16	-6.94104	-74.326	T_NK
CD45posfresh_5_17	68.7623	-26.1867	T_NK
CD45posfresh_5_18	47.2438	-37.1877	T_NK
CD45posfresh_5_19	47.8061	-22.7108	T_NK
CD45posfresh_5_21	4.32511	-48.8556	Macrophage
CD45posfresh_5_23	46.5321	-9.75105	T_NK
CD45posfresh_5_24	45.5162	-33.3711	T_NK
CD45posfresh_5_25	14.3126	-66.8624	B_cells
CD45posfresh_5_26	66.383	-14.1056	T_NK
CD45posfresh_5_27	55.3817	-22.0355	T_NK
CD45posfresh_5_28	67.0822	-26.5023	T_NK
CD45posfresh_5_29	36.3117	-6.56312	T_NK
CD45posfresh_5_30	52.7432	-49.6939	T_NK
CD45posfresh_5_32	54.3326	-16.7836	T_NK
CD45posfresh_5_34	56.7711	11.9326	T_NK
CD45posfresh_5_35	-7.11326	-73.7059	T_NK
CD45posfresh_5_36	12.9029	-72.38	B_cells
CD45posfresh_5_37	4.59177	-11.8568	T_NK
CD45posfresh_5_39	54.0635	-38.8738	T_NK
CD45posfresh_5_41	41.2879	-48.009	T_NK
CD45posfresh_5_42	24.5387	18.1352	T_NK
CD45posfresh_5_43	53.3835	-8.7094	T_NK
CD45posfresh_5_44	-9.71997	-38.4308	Macrophage
CD45posfresh_5_45	53.9723	-49.5933	T_NK
CD45posfresh_5_46	64.0992	-37.4875	T_NK
CD45posfresh_5_47	42.7827	-19.9554	T_NK
CD45posfresh_5_48	64.358	3.2798	T_NK
CD45posfresh_5_49	39.2861	-16.6722	T_NK
CD45posfresh_5_50	61.394	-41.6284	T_NK
CD45posfresh_5_51	50.513	-39.1588	T_NK
CD45posfresh_5_52	22.6641	-8.83826	T_NK
CD45posfresh_5_53	35.388	-27.3408	T_NK
CD45posfresh_5_56	51.9698	1.94737	T_NK
CD45posfresh_5_57	59.5535	-35.812	T_NK
CD45posfresh_5_58	48.3023	-13.696	T_NK
CD45posfresh_5_59	10.3209	-50.3381	Macrophage
CD45posfresh_5_60	54.1697	-44.688	T_NK
CD45posfresh_5_61	60.1757	-42.5001	T_NK
CD45posfresh_5_62	55.4809	-13.7064	T_NK
CD45posfresh_5_64	30.2175	12.5059	T_NK
CD45posfresh_5_65	44.2727	-5.3844	T_NK
CD45posfresh_5_66	61.7594	1.76362	T_NK
CD45posfresh_5_67	61.2169	-6.57948	T_NK
CD45posfresh_5_68	-7.39917	-67.8616	T_NK
CD45posfresh_5_69	44.7501	-32.8035	T_NK
CD45posfresh_5_70	55.419	-50.2929	T_NK
CD45posfresh_5_71	28.9617	7.9938	T_NK
CD45posfresh_5_72	-1.32814	-20.5428	Macrophage
CD45posfresh_5_73	47.1189	-39.0635	T_NK
CD45posfresh_5_74	50.8184	-8.93454	T_NK
CD45posfresh_5_76	35.5398	-40.6867	T_NK
CD45posfresh_5_77	-13.098	-21.8072	Macrophage
CD45posfresh_5_78	25.5321	-27.3813	T_NK
CD45posfresh_5_79	61.6563	3.38326	T_NK
CD45posfresh_5_80	57.4823	-33.2415	T_NK
CD45posfresh_5_81	24.1732	16.955	T_NK
CD45posfresh_5_83	53.7889	-7.19631	T_NK
CD45posfresh_5_84	39.5986	-25.0466	T_NK
CD45posfresh_5_85	45.8771	-18.0551	T_NK
CD45posfresh_5_86	48.4928	0.236927	T_NK
CD45posfresh_5_87	55.2127	-13.3405	T_NK
CD45posfresh_5_88	14.8261	0.496669	T_NK
CD45posfresh_5_89	12.0359	-47.0251	Macrophage
CD45posfresh_5_90	-5.66476	0.0953004	T_NK
CD45posfresh_5_91	-3.03892	2.40279	T_NK
CD45posfresh_5_92	55.0058	-48.7104	T_NK
CD45posfresh_5_93	37.8072	-31.2616	T_NK
CD45posfresh_5_94	31.1484	8.94608	T_NK
CD45posfresh_5_96	32.3418	-30.815	T_NK
CD45posfresh_6_97	67.1268	-29.8862	T_NK
CD45posfresh_6_99	66.5716	-34.396	T_NK
CD45posfresh_6_100	65.5326	-4.67003	T_NK
CD45posfresh_6_101	65.1089	-28.2718	T_NK
CD45posfresh_6_102	66.2855	-26.4232	T_NK
CD45posfresh_6_103	51.336	-20.2087	T_NK
CD45posfresh_6_105	45.62	-28.2638	T_NK
CD45posfresh_6_106	57.2696	-33.1822	T_NK
CD45posfresh_6_107	62.1996	-17.1371	T_NK
CD45posfresh_6_108	23.2183	29.949	T_NK
CD45posfresh_6_109	32.4244	21.7391	T_NK
CD45posfresh_6_110	54.7648	-13.7467	T_NK
CD45posfresh_6_111	48.5047	-18.8327	T_NK
CD45posfresh_6_112	27.208	-42.9102	T_NK
CD45posfresh_6_115	11.0194	-15.9593	T_NK
CD45posfresh_6_116	52.4953	-7.964	T_NK
CD45posfresh_6_117	45.9903	15.8957	T_NK
CD45posfresh_6_118	48.0861	-33.2674	T_NK
CD45posfresh_6_119	40.0744	14.1702	T_NK
CD45posfresh_6_120	57.2069	-29.3313	T_NK
CD45posfresh_6_121	60.2451	-32.8322	T_NK
CD45posfresh_6_122	45.3597	-33.1621	T_NK
CD45posfresh_6_124	49.7784	19.0669	T_NK
CD45posfresh_6_128	53.0817	-13.5435	T_NK
CD45posfresh_6_129	28.2963	-20.6021	T_NK
CD45posfresh_6_130	-0.725759	-53.9438	Macrophage
CD45posfresh_6_131	22.0291	-15.4575	T_NK
CD45posfresh_6_132	48.1445	1.48556	T_NK
CD45posfresh_6_133	29.2362	18.4593	T_NK
CD45posfresh_6_134	-6.99448	-69.9095	T_NK
CD45posfresh_6_135	65.3751	-14.7673	Cholangiocytes
CD45posfresh_6_136	32.5259	-34.5862	T_NK
CD45posfresh_6_138	48.1323	-22.7328	T_NK
CD45posfresh_6_139	43.3198	16.134	T_NK
CD45posfresh_6_141	52.6853	-30.4726	T_NK
CD45posfresh_6_142	59.4678	-25.4942	T_NK
CD45posfresh_6_143	69.7331	-7.30567	T_NK
CD45posfresh_6_144	51.7561	-33.549	T_NK
CD45posfresh_6_145	-12.2267	-13.3086	B_cells
CD45posfresh_6_146	27.4597	-21.415	T_NK
CD45posfresh_6_147	31.2296	13.9479	T_NK
CD45posfresh_6_148	33.712	-42.826	T_NK
CD45posfresh_6_149	48.4085	3.81929	T_NK
CD45posfresh_6_150	28.7255	-18.6834	T_NK
CD45posfresh_6_151	-6.08278	-74.3279	T_NK
CD45posfresh_6_152	33.0572	-37.7505	T_NK
CD45posfresh_6_153	23.9392	-11.5254	T_NK
CD45posfresh_6_154	34.3607	-42.9925	T_NK
CD45posfresh_6_155	42.0581	-19.7407	T_NK
CD45posfresh_6_156	38.7643	-3.75882	T_NK
CD45posfresh_6_157	34.726	-14.6509	T_NK
CD45posfresh_6_158	71.4573	-26.8414	T_NK
CD45posfresh_6_159	66.7711	-31.4423	T_NK
CD45posfresh_6_160	46.2058	-38.7007	T_NK
CD45posfresh_6_161	71.5329	-26.9009	T_NK
CD45posfresh_6_162	48.2991	-33.2606	T_NK
CD45posfresh_6_163	23.3645	-11.1306	T_NK
CD45posfresh_6_164	35.8221	-4.32301	T_NK
CD45posfresh_6_165	44.6946	-1.56414	T_NK
CD45posfresh_6_167	13.6256	-45.8649	Macrophage
CD45posfresh_6_168	55.5284	-50.2795	T_NK
CD45posfresh_6_169	44.8324	-24.7817	T_NK
CD45posfresh_6_170	0.381506	-53.0619	Macrophage
CD45posfresh_6_172	46.1802	-35.42	T_NK
CD45posfresh_6_173	34.1336	-56.8583	T_NK
CD45posfresh_6_175	38.0952	-47.1518	Macrophage
CD45posfresh_6_177	31.6419	11.8475	T_NK
CD45posfresh_6_178	29.836	-39.2375	T_NK
CD45posfresh_6_179	-12.3822	-17.2096	T_NK
CD45posfresh_6_183	63.7463	-37.7627	T_NK
CD45posfresh_6_184	-19.8359	-28.6094	T_NK
CD45posfresh_6_185	31.5986	11.3642	T_NK
CD45posfresh_6_186	47.1973	-38.2866	T_NK
CD45posfresh_6_187	51.7889	-20.1978	T_NK
CD45posfresh_6_192	52.4943	-8.69866	T_NK
CD45posfresh_7_1	52.3867	-32.1382	T_NK
CD45posfresh_7_2	46.2831	-15.9886	T_NK
CD45posfresh_7_3	54.9121	-12.1339	T_NK
CD45posfresh_7_4	25.3478	-46.0733	T_NK
CD45posfresh_7_5	31.2745	-36.021	T_NK
CD45posfresh_7_7	36.2396	-53.1014	T_NK
CD45posfresh_7_8	31.6096	-37.3238	T_NK
CD45posfresh_7_10	2.10288	6.00835	T_NK
CD45posfresh_7_11	45.0829	-25.1317	T_NK
CD45posfresh_7_12	56.2883	-48.6915	T_NK
CD45posfresh_7_14	54.6137	-45.8897	T_NK
CD45posfresh_7_15	27.0754	-47.1297	T_NK
CD45posfresh_7_16	-5.29692	-74.5479	T_NK
CD45posfresh_7_17	51.2842	-8.05102	T_NK
CD45posfresh_7_18	59.7688	-9.46568	T_NK
CD45posfresh_7_19	35.8426	-53.4182	T_NK
CD45posfresh_7_20	39.145	-31.6378	T_NK
CD45posfresh_7_22	32.1235	-28.4827	T_NK
CD45posfresh_7_23	48.7864	-17.3301	T_NK
CD45posfresh_7_25	52.5829	-4.78239	T_NK
CD45posfresh_7_26	43.7626	-24.0597	T_NK
CD45posfresh_7_27	41.5606	-25.5914	T_NK
CD45posfresh_7_28	66.3203	-26.6963	T_NK
CD45posfresh_7_29	52.2141	-48.1427	T_NK
CD45posfresh_7_30	56.4092	-49.1803	T_NK
CD45posfresh_7_31	45.4555	-23.088	T_NK
CD45posfresh_7_32	42.3092	-41.8589	T_NK
CD45posfresh_7_33	13.5397	-46.116	Macrophage
CD45posfresh_7_36	49.1637	-47.1384	T_NK
CD45posfresh_7_37	35.2207	-37.3223	T_NK
CD45posfresh_7_38	42.5714	-20.636	T_NK
CD45posfresh_7_39	41.9655	-25.5343	T_NK
CD45posfresh_7_42	46.3219	-0.288217	T_NK
CD45posfresh_7_44	59.1784	-40.7113	T_NK
CD45posfresh_7_45	-19.5811	-28.8966	T_NK
CD45posfresh_7_46	43.8683	-16.6814	T_NK
CD45posfresh_7_47	48.8321	-42.2764	T_NK
CD45posfresh_7_48	54.7631	1.79493	T_NK
CD45posfresh_7_49	41.5738	-39.2487	T_NK
CD45posfresh_7_50	54.9854	-41.3774	T_NK
CD45posfresh_7_51	52.4126	-38.2162	T_NK
CD45posfresh_7_52	39.7356	-22.3317	T_NK
CD45posfresh_7_53	23.9142	-11.4744	T_NK
CD45posfresh_7_54	44.0273	-30.6597	T_NK
CD45posfresh_7_55	39.4423	-21.7568	T_NK
CD45posfresh_7_56	36.5836	-4.12126	T_NK
CD45posfresh_7_58	13.2064	-46.0841	Macrophage
CD45posfresh_7_60	47.5907	-14.9125	T_NK
CD45posfresh_7_61	34.8542	-45.2309	T_NK
CD45posfresh_7_62	46.7304	-36.5028	T_NK
CD45posfresh_7_63	59.9794	-42.4343	T_NK
CD45posfresh_7_64	60.0627	-34.115	T_NK
CD45posfresh_7_65	60.6161	-42.211	T_NK
CD45posfresh_7_66	47.3631	-37.4012	T_NK
CD45posfresh_7_67	61.5187	-40.9156	T_NK
CD45posfresh_7_68	-4.45832	-67.6244	T_NK
CD45posfresh_7_69	35.8119	-27.6556	T_NK
CD45posfresh_7_70	55.3124	-50.0133	T_NK
CD45posfresh_7_71	63.183	-36.8124	T_NK
CD45posfresh_7_73	66.3918	-26.1949	T_NK
CD45posfresh_7_74	53.5731	-46.4178	T_NK
CD45posfresh_7_75	29.8193	-17.0032	T_NK
CD45posfresh_7_76	53.3121	-41.6052	T_NK
CD45posfresh_7_78	28.4193	-37.4299	T_NK
CD45posfresh_7_79	25.3137	14.0011	T_NK
CD45posfresh_7_80	25.6764	-21.2938	T_NK
CD45posfresh_7_81	28.8439	-17.0508	T_NK
CD45posfresh_7_82	53.1737	-12.5144	T_NK
CD45posfresh_7_83	44.7675	-41.5532	T_NK
CD45posfresh_7_84	35.7941	-53.4473	T_NK
CD45posfresh_7_85	30.2456	-36.3891	T_NK
CD45posfresh_7_86	54.0921	-1.19438	T_NK
CD45posfresh_7_87	70.4791	-8.47309	T_NK
CD45posfresh_7_88	48.6968	-7.4131	T_NK
CD45posfresh_7_89	48.3963	-17.5309	T_NK
CD45posfresh_7_90	34.8108	-42.0401	T_NK
CD45posfresh_7_91	42.8384	-18.3536	T_NK
CD45posfresh_7_93	26.5354	-28.881	T_NK
CD45posfresh_7_94	63.7438	-13.5068	T_NK
CD45posfresh_7_95	46.5951	-2.56181	T_NK
CD45posfresh_7_96	24.7828	-50.3005	T_NK
CD45posfresh_8_97	61.0179	-40.7437	T_NK
CD45posfresh_8_98	44.5849	-30.8152	T_NK
CD45posfresh_8_99	64.978	-32.2032	T_NK
CD45posfresh_8_100	51.9981	-11.7546	T_NK
CD45posfresh_8_102	65.0132	-12.7222	T_NK
CD45posfresh_8_103	34.9806	-32.6908	T_NK
CD45posfresh_8_104	34.0533	-32.9744	T_NK
CD45posfresh_8_105	47.0033	13.5718	T_NK
CD45posfresh_8_106	53.217	-47.4459	T_NK
CD45posfresh_8_107	53.1348	-11.7192	T_NK
CD45posfresh_8_109	64.9728	4.41739	T_NK
CD45posfresh_8_110	20.6542	-26.969	T_NK
CD45posfresh_8_112	26.7881	-48.1267	T_NK
CD45posfresh_8_113	52.8491	-49.3946	T_NK
CD45posfresh_8_114	45.5062	-28.9567	T_NK
CD45posfresh_8_115	35.2804	-17.9137	T_NK
CD45posfresh_8_116	52.565	0.492877	T_NK
CD45posfresh_8_117	-53.5885	-41.3299	Cholangiocytes
CD45posfresh_8_118	26.4796	-22.5253	T_NK
CD45posfresh_8_119	38.0686	-5.81893	T_NK
CD45posfresh_8_120	13.3347	-72.3274	B_cells
CD45posfresh_8_122	33.5351	-29.8616	T_NK
CD45posfresh_8_123	52.4375	-31.0878	T_NK
CD45posfresh_8_125	3.31121	-51.1478	Macrophage
CD45posfresh_8_127	37.2021	-51.6052	T_NK
CD45posfresh_8_129	39.5741	-48.4195	T_NK
CD45posfresh_8_130	41.9962	-28.871	T_NK
CD45posfresh_8_131	27.0549	-21.154	T_NK
CD45posfresh_8_132	54.8823	-25.3257	T_NK
CD45posfresh_8_134	-3.70695	-68.2927	T_NK
CD45posfresh_8_135	35.7768	35.9419	Cholangiocytes
CD45posfresh_8_136	22.7222	-14.4107	T_NK
CD45posfresh_8_137	58.1849	9.59341	T_NK
CD45posfresh_8_138	61.5281	-1.64214	T_NK
CD45posfresh_8_140	47.8021	-18.7614	T_NK
CD45posfresh_8_141	63.2541	-45.9503	T_NK
CD45posfresh_8_142	55.5266	-12.9162	T_NK
CD45posfresh_8_143	57.1047	-5.11417	T_NK
CD45posfresh_8_146	38.6185	-4.3028	T_NK
CD45posfresh_8_148	48.926	-17.1644	T_NK
CD45posfresh_8_149	32.2756	13.1927	T_NK
CD45posfresh_8_150	39.2535	-0.891309	T_NK
CD45posfresh_8_151	-6.06989	-74.0801	T_NK
CD45posfresh_8_152	52.2181	-41.4691	T_NK
CD45posfresh_8_153	-12.4879	-17.2594	T_NK
CD45posfresh_8_154	39.3725	-21.7056	T_NK
CD45posfresh_8_155	54.1395	-10.4075	T_NK
CD45posfresh_8_157	46.1268	-1.53591	T_NK
CD45posfresh_8_158	45.8164	6.07723	T_NK
CD45posfresh_8_160	42.7325	-38.0861	T_NK
CD45posfresh_8_162	33.7112	-29.8372	T_NK
CD45posfresh_8_163	4.24273	-49.3324	Macrophage
[truncated: 5,132 more rows]

## Sheet: 10x liver
tSNE result of 10x liver dataset
	TSNE1	TSNE2	cluster
P3TLH_CGTTCTGAGTCGTTTG_1	19.7967	-44.0982	Hepatocytes
P3TLH_TCTATTGTCCTATTCA_1	-19.0084	-25.603	Hepatocytes
P2TLH_AGATCTGTCCTGTACC_1	-44.24	-50.936	Hepatocytes
P3TLH_CACCAGGTCAGAAATG_1	-5.14033	-39.0919	Hepatocytes
P3TLH_AGTTGGTGTTAAAGAC_1	37.1334	-19.8074	Hepatocytes
P2TLH_ACGAGGAGTTCCGGCA_1	-35.5489	-59.5554	Hepatocytes
P4TLH_TTAGTTCGTACAGTGG_1	24.4021	51.1054	T_NK
P4TLH_CCTCTGACAGGTCCAC_1	26.1364	44.4173	T_NK
P3TLH_CACATTTAGACCACGA_1	39.1625	-7.60937	Hepatocytes
P3TLH_GCTTCCAAGGGAAACA_1	-10.1455	-17.1936	Hepatocytes
P4TLH_TCACAAGTCGCGTAGC_1	73.2247	24.8346	T_NK
P4TLH_TATCAGGGTTCCTCCA_1	20.116	53.2587	T_NK
P5TLH_TATCTCAGTGTTCGAT_1	45.0324	7.97037	T_NK
P3TLH_GTCGGGTGTCTTGCGG_1	12.2885	-23.114	Hepatocytes
P5TLH_TACTCGCAGGAATCGC_1	69.2525	-8.94261	T_NK
P5TLH_TAGGCATTCCATGAAC_1	38.4509	40.0529	T_NK
P1TLH_CAGATCAAGTAGGTGC_1	35.8094	63.5535	T_NK
P4TLH_GCGGGTTTCTAAGCCA_1	49.7271	23.2004	T_NK
P1TLH_AGCTTGAGTGAGGCTA_1	45.0056	57.3736	T_NK
P5TLH_CTACCCAAGCAGATCG_1	45.8779	12.1949	T_NK
P3TLH_CGATGTACATGCATGT_1	3.53081	-24.9248	Hepatocytes
P4TLH_CAGCGACTCTGGCGAC_1	4.33756	66.6962	B_cells
P3TLH_CGCTGGAGTGTGACCC_1	-25.4494	70.5877	Periportal_LSECs
P3TLH_TTTGTCAAGGTCATCT_1	36.6135	-11.2602	Hepatocytes
P5TLH_GAAATGAAGTGTACGG_1	22.9613	24.7287	T_NK
P5TLH_CTCAGAACATTCCTGC_1	66.3527	-1.74038	T_NK
P3TLH_TACTCATTCCCATTTA_1	21.2459	-36.8616	Hepatocytes
P3TLH_GCAGTTATCGCCAGCA_1	28.3053	-1.79548	Hepatocytes
P2TLH_TTGACTTGTTCGGGCT_1	-33.6584	62.766	Periportal_LSECs
P3TLH_GCGCGATAGTTACCCA_1	28.3436	-22.755	Hepatocytes
P5TLH_CAGTCCTCACAGGTTT_1	27.0377	23.2142	T_NK
P1TLH_CAGAGAGCAATCACAC_1	-61.2664	-27.3062	Macrophage
P4TLH_AGAGCGACATGATCCA_1	61.2114	36.2864	T_NK
P1TLH_TATTACCAGGATGTAT_1	38.5027	64.8033	T_NK
P5TLH_TGTATTCAGTGACATA_1	-52.7901	-16.3325	Macrophage
P3TLH_GACCTGGAGCTTATCG_1	37.7704	-10.6808	Hepatocytes
P5TLH_TCAGCAAGTAACGCGA_1	21.4435	37.4043	T_NK
P4TLH_ATAAGAGGTCCGCTGA_1	72.6723	28.106	T_NK
P4TLH_AGTGGGACATGCAACT_1	54.9791	24.3413	T_NK
P3TLH_GCTGCGAAGGATATAC_1	28.3086	-1.57694	Hepatocytes
P3TLH_GTGAAGGCACAGGAGT_1	23.2569	-39.3173	Hepatocytes
P3TLH_ATAACGCCATCACGTA_1	-12.0567	-16.3298	Hepatocytes
P3TLH_ATTGGACAGAGGTAGA_1	26.3086	-35.6924	Hepatocytes
P3TLH_TTGCGTCCAATGAATG_1	18.3174	-3.06481	Hepatocytes
P3TLH_TAGTGGTAGTGTTTGC_1	-72.3006	-7.63993	Macrophage
P3TLH_AACTGGTTCCTGCCAT_1	16.5145	-37.0186	Hepatocytes
P4TLH_GGTATTGCAATGGAGC_1	-36.9448	39.3907	Central_venous_LSECs
P5TLH_CTCGGAGAGTCGATAA_1	47.1202	9.40257	T_NK
P3TLH_ACCGTAAAGCAGATCG_1	1.86135	-43.3324	Hepatocytes
P4TLH_CTGATCCTCCAAGCCG_1	-26.3592	69.3431	Periportal_LSECs
P3TLH_TTGACTTTCATTTGGG_1	22.661	-16.9433	Hepatocytes
P5TLH_GCTCTGTCATGCTAGT_1	-12.663	0.573504	Hepatocytes
P3TLH_TGGTTAGTCAATAAGG_1	13.5412	-38.0063	Hepatocytes
P2TLH_CAGCTGGTCACAACGT_1	-22.4027	-64.4871	Hepatocytes
P3TLH_TTTACTGCACCTTGTC_1	28.1367	-50.8766	Hepatocytes
P1TLH_GTATCTTGTTTACTCT_1	-52.4968	25.1748	Macrophage
P5TLH_CGTGTAAGTGTGAAAT_1	11.5199	-68.9323	Hepatocytes
P3TLH_TGACAACGTCATCGGC_1	17.1436	-34.8253	Hepatocytes
P4TLH_CCCATACAGTTTCCTT_1	-56.268	9.0958	Macrophage
P3TLH_AAGGCAGGTGTTGGGA_1	-6.99909	-16.4771	Hepatocytes
P1TLH_TTAACTCAGATATGCA_1	-44.4955	44.0404	Central_venous_LSECs
P3TLH_ATTCTACAGCGTAATA_1	29.7175	-12.6826	Hepatocytes
P2TLH_TTCGGTCTCTCATTCA_1	-9.33474	23.8069	B_cells
P1TLH_CGTTAGATCTAGAGTC_1	28.2933	65.0904	T_NK
P3TLH_GTCACGGCAGATCGGA_1	-18.3577	-23.1097	Hepatocytes
P5TLH_CAAGAAATCCTTGGTC_1	53.6465	11.317	T_NK
P3TLH_ACACCAATCTTTCCTC_1	19.6659	-4.62111	Hepatocytes
P3TLH_GATGAAAAGATACACA_1	-3.85891	-36.2786	Hepatocytes
P3TLH_TGAAAGAGTGAGGGTT_1	-19.8869	-6.21599	Hepatocytes
P3TLH_CCATTCGCAAGCCTAT_1	28.9356	-42.7779	Hepatocytes
P3TLH_GGATGTTGTCATACTG_1	27.5055	-15.448	Hepatocytes
P5TLH_ATCATCTGTACGCACC_1	62.8996	3.09414	T_NK
P4TLH_AATCGGTTCTAACTCT_1	-45.7628	-3.72167	Macrophage
P5TLH_CATTCGCTCGCAAGCC_1	-14.4219	37.3807	B_cells
P1TLH_CGGACTGGTAGTAGTA_1	-40.9966	50.4802	Central_venous_LSECs
P1TLH_CACATTTGTCGCGGTT_1	-52.4506	24.5487	Macrophage
P5TLH_TTGTAGGAGCTTATCG_1	70.9936	-5.01136	T_NK
P4TLH_AACACGTCAATGAAAC_1	-30.2245	23.0761	Cholangiocytes
P2TLH_TACTCGCAGTTCGCGC_1	-26.2677	60.9454	Periportal_LSECs
P1TLH_TCAGGTAGTTGCTCCT_1	-1.76183	-81.5884	Hepatocytes
P5TLH_TCACGAAAGGTGATTA_1	26.1817	23.3503	T_NK
P2TLH_ACACCCTGTGTGTGCC_1	-31.0214	-62.7293	Hepatocytes
P5TLH_CCACCTAAGAAGGTGA_1	53.522	12.6631	T_NK
P5TLH_GGGCACTCAGGGAGAG_1	-57.5962	16.2125	Macrophage
P5TLH_TCGAGGCAGTATGACA_1	9.54017	-74.0255	Hepatocytes
P2TLH_GTGCAGCCATGGTCAT_1	-15.4339	43.0809	B_cells
P3TLH_GATGAGGAGGAATTAC_1	-10.5912	-28.2515	Hepatocytes
P3TLH_GTCTTCGTCGAGAACG_1	33.7635	-27.3137	Hepatocytes
P1TLH_AGAGTGGTCTCCCTGA_1	36.3245	64.8181	T_NK
P1TLH_TAAGAGATCATGTGGT_1	-0.662217	-78.0389	Hepatocytes
P5TLH_TCCCGATGTCCGCTGA_1	45.811	13.552	T_NK
P5TLH_CACCACTAGACCTAGG_1	29.5192	21.9912	T_NK
P3TLH_GCCTCTAAGATGTGGC_1	-76.566	-5.62365	Macrophage
P5TLH_AGGCCACGTCTCTTAT_1	43.02	12.1738	T_NK
P4TLH_GATGCTAGTTTAGCTG_1	23.3505	51.8406	T_NK
P3TLH_CAGGTGCGTCTAGTGT_1	-9.45202	-27.9989	Hepatocytes
P2TLH_CATGCCTTCGTCCGTT_1	-30.5262	-62.579	Hepatocytes
P4TLH_CGTCAGGTCCACTGGG_1	25.5972	45.0029	T_NK
P4TLH_TTAGGACAGCATCATC_1	-57.3652	9.02799	Macrophage
P3TLH_CCAGCGATCACCTCGT_1	40.2704	-21.6323	Hepatocytes
P2TLH_TCAGGATCAGAAGCAC_1	-49.3244	-54.2399	Hepatocytes
P1TLH_CTACGTCTCCTCAATT_1	-47.6374	44.0318	Central_venous_LSECs
P3TLH_TACTTGTTCACGCGGT_1	5.92256	-30.3447	Hepatocytes
P3TLH_GTAACTGAGTGACTCT_1	36.6521	-20.7833	Hepatocytes
P1TLH_GGTATTGCAAAGCGGT_1	35.7503	67.2399	T_NK
P3TLH_CACACCTTCGCTAGCG_1	8.71643	-11.8485	Hepatocytes
P5TLH_AGTCTTTTCGCAGGCT_1	25.0938	20.3348	T_NK
P5TLH_ACGATACTCTGTCCGT_1	-48.7199	-16.7425	Macrophage
P3TLH_GAAGCAGCATCCAACA_1	28.5137	-46.1615	Hepatocytes
P2TLH_TGAGGGACAGACGCTC_1	-3.93954	27.7074	B_cells
P5TLH_GGATGTTGTTCACCTC_1	34.6974	31.7389	T_NK
P4TLH_GTCACAATCAACACGT_1	72.4062	23.1285	T_NK
P4TLH_CGAACATTCACGCATA_1	-58.912	-4.16116	Macrophage
P3TLH_CACAGTATCGTTACAG_1	24.7648	-57.8542	Hepatocytes
P1TLH_GTTTCTACACGGCGTT_1	78.549	15.0963	T_NK
P5TLH_CATGGCGAGGTCATCT_1	29.4196	34.4164	T_NK
P2TLH_GAGTCCGCATCCGCGA_1	-52.7446	15.4291	Macrophage
P1TLH_AGGCCACGTCCAGTTA_1	-51.4143	-1.52364	Macrophage
P4TLH_TACTCGCCAAGTAATG_1	-63.6223	11.5961	Macrophage
P1TLH_ATTATCCCATTCCTCG_1	-47.6181	-0.339763	Macrophage
P2TLH_AGTCTTTCACTTACGA_1	-36.4486	-61.5114	Hepatocytes
P4TLH_AAGTCTGGTTCGAATC_1	55.8733	26.0118	T_NK
P3TLH_AGGGAGTCAGTGGGAT_1	-14.1158	-25.8068	Hepatocytes
P3TLH_CGATCGGTCATTCACT_1	6.21097	-10.1578	Hepatocytes
P5TLH_ACATACGGTCCGAATT_1	45.4831	10.0318	T_NK
P3TLH_CCTACACTCGGAAACG_1	5.55833	-39.6342	Hepatocytes
P3TLH_CGGACTGCAAGCGAGT_1	-21.7333	30.8142	B_cells
P3TLH_CTAATGGCAGTACACT_1	-0.48515	-17.9683	Hepatocytes
P4TLH_CACACCTGTCGATTGT_1	-62.3487	8.35306	Macrophage
P3TLH_ATTCTACCAATGACCT_1	30.0527	-44.1068	Hepatocytes
P1TLH_CACAAACAGTCGTACT_1	50.1118	29.5199	T_NK
P1TLH_GAATAAGGTCGCGTGT_1	-52.369	22.1397	Macrophage
P3TLH_ACGCCGACATCACAAC_1	-14.472	-6.12962	Hepatocytes
P5TLH_TGCCAAAGTTAAGATG_1	32.8972	22.2178	T_NK
P3TLH_GGAGCAACAGACAAGC_1	-77.74	-4.39296	Macrophage
P1TLH_AGCTTGAGTCAGAGGT_1	-44.5898	44.359	Central_venous_LSECs
P3TLH_ATGGGAGAGTGTCTCA_1	-23.9456	-19.1798	Hepatocytes
P3TLH_TTTACTGGTCTCCCTA_1	-70.6215	-9.93729	Macrophage
P2TLH_GCTGCAGCAGGATTGG_1	-14.6525	41.3979	B_cells
P5TLH_TAAGAGATCACAGTAC_1	68.3299	3.90009	T_NK
P3TLH_AGAGTGGGTCACTGGC_1	-71.8163	-1.00048	Macrophage
P3TLH_AAGGTTCTCAGGATCT_1	33.1627	-24.7744	Hepatocytes
P5TLH_GGAAAGCTCAGCTTAG_1	52.1452	12.9196	T_NK
P2TLH_TGTATTCTCGGCTTGG_1	-27.3216	67.4579	Periportal_LSECs
P4TLH_CCGTTCATCTTGTATC_1	-61.8198	11.6313	Macrophage
P3TLH_ATCGAGTAGCCTATGT_1	25.1221	-4.69413	Hepatocytes
P5TLH_GGACGTCTCGCACTCT_1	-30.0408	59.3698	Periportal_LSECs
P2TLH_GGGCATCCAGATGGCA_1	-34.1357	-66.8536	Hepatocytes
P4TLH_GTTCGGGGTCTAGAGG_1	18.8007	45.1816	T_NK
P1TLH_TGGGAAGGTAGGGTAC_1	28.2668	62.8633	T_NK
P5TLH_GACGGCTGTGAACCTT_1	-27.8844	58.4297	Periportal_LSECs
P3TLH_ACGGGCTTCGGCTTGG_1	-70.7345	-4.67757	Macrophage
P3TLH_CTACACCTCAGCACAT_1	25.2233	-49.5913	Hepatocytes
P2TLH_TCACAAGGTGCAGTAG_1	-27.3437	14.4315	Cholangiocytes
P1TLH_TCCACACCACCACCAG_1	54.9942	42.4261	T_NK
P5TLH_GAATAAGAGATCCTGT_1	11.733	-71.9991	Hepatocytes
P5TLH_GACGTGCAGTGGCACA_1	-30.0186	65.5398	Periportal_LSECs
P2TLH_CACATTTGTAGCTTGT_1	-28.4144	-49.3301	Hepatocytes
P1TLH_CACACTCAGATGCGAC_1	36.6002	55.6021	T_NK
P4TLH_CTAGCCTAGTGGGATC_1	-18.5592	32.3285	B_cells
P2TLH_GCGGGTTGTCTAGTGT_1	-41.3235	-56.4623	Hepatocytes
P1TLH_GGCTGGTGTAGGGTAC_1	-4.99511	-83.2632	Hepatocytes
P5TLH_TACACGACATCTGGTA_1	-30.5202	16.8264	Cholangiocytes
P3TLH_AAGGAGCGTAATCACC_1	14.8121	-36.5506	Hepatocytes
P3TLH_ATCACGAAGGCTAGAC_1	30.3478	-54.5175	Hepatocytes
P2TLH_TTCTACACAACCGCCA_1	-20.7415	-68.2356	Hepatocytes
P2TLH_TATGCCCAGAGTCTGG_1	-75.1594	16.6401	Macrophage
P4TLH_GCAAACTCAAGTACCT_1	67.9473	26.5577	T_NK
P5TLH_ATCATCTTCTTAACCT_1	7.93835	-72.8377	Hepatocytes
P5TLH_GCATGATGTCAGAGGT_1	-26.0747	54.8214	Periportal_LSECs
P3TLH_AACTTTCTCGCGTTTC_1	-5.84191	-15.4257	Hepatocytes
P3TLH_CGTGTAATCCACTGGG_1	11.6627	-36.1985	Hepatocytes
P4TLH_GTAGTCACATTTGCTT_1	-5.35961	39.4448	B_cells
P5TLH_GTCACAACAAAGAATC_1	8.37711	-68.9429	Hepatocytes
P3TLH_CGAGCACCAAGCTGTT_1	23.6237	-46.0728	Hepatocytes
P2TLH_TGTCCCATCTGGTATG_1	-44.4774	-53.583	Hepatocytes
P3TLH_TGGCCAGTCTTTACAC_1	22.2184	-46.869	Hepatocytes
P1TLH_GTCACAATCACTGGGC_1	-52.2542	21.1653	Macrophage
P2TLH_ACGCCGATCTGCAGTA_1	-55.3845	-2.52786	Macrophage
P4TLH_CAGGTGCTCTTGTCAT_1	60.314	38.3226	T_NK
P3TLH_ATCCGAAAGAGCCCAA_1	37.0014	-53.6333	Hepatocytes
P3TLH_TAGGCATAGTTGTAGA_1	6.60972	-10.483	Hepatocytes
P3TLH_GGGCACTCACAGACAG_1	1.34343	-8.67666	Hepatocytes
P3TLH_CATCGAAGTTGCGTTA_1	-24.8575	14.0707	Cholangiocytes
P3TLH_GGCGACTAGCCGATTT_1	29.3929	-0.139156	Hepatocytes
P5TLH_GCTCTGTGTCTCGTTC_1	70.0818	-6.01732	T_NK
P2TLH_GCTGCAGAGAATGTTG_1	-1.4333	30.6795	B_cells
P1TLH_CAAGGCCAGAGACTTA_1	-47.7058	45.3176	Central_venous_LSECs
P2TLH_GGGCATCGTGGCTCCA_1	-4.16029	24.5406	B_cells
P3TLH_CAAGAAAAGCGATAGC_1	14.7455	-21.9868	Hepatocytes
P3TLH_GCAGTTATCGTGTAGT_1	-8.17371	-27.7314	Hepatocytes
P2TLH_TGCTGCTGTCACTTCC_1	-1.85872	40.7425	B_cells
P4TLH_CGTAGCGCACATCCGG_1	-74.4505	8.87489	Macrophage
P3TLH_GAATAAGTCACAATGC_1	23.4619	-9.95724	Hepatocytes
P3TLH_GAACCTAGTATGGTTC_1	14.8419	-24.9464	Hepatocytes
P3TLH_CGAATGTCATCAGTCA_1	13.8974	-43.2699	Hepatocytes
P1TLH_GGGTTGCCAAGTCATC_1	-45.4353	47.3443	Central_venous_LSECs
P3TLH_CGGACGTAGACGCAAC_1	35.3683	-15.4047	Hepatocytes
P2TLH_CAAGATCTCGTTGCCT_1	-24.4485	-66.1019	Hepatocytes
P2TLH_TCTGGAAGTCCGAATT_1	-27.6201	-49.2356	Hepatocytes
P5TLH_TTCTTAGGTGCGAAAC_1	22.9515	25.7006	T_NK
P1TLH_GGACATTAGATAGCAT_1	19.249	-26.9265	Hepatocytes
P3TLH_CGGGTCAAGCAATCTC_1	-67.1875	14.7188	Macrophage
P2TLH_CTCGGGATCTCACATT_1	-21.4255	-67.5702	Hepatocytes
P2TLH_TATCTCACAGTTTACG_1	-49.8138	-52.2889	Hepatocytes
P3TLH_CAGCGACCACCTCGGA_1	-10.64	-21.0075	Hepatocytes
P3TLH_GGCCGATCAGATCTGT_1	2.67785	-32.3474	Hepatocytes
P2TLH_AAGGTTCAGCCAACAG_1	-0.805224	21.5155	B_cells
P3TLH_GCAGCCACAACCGCCA_1	1.34832	-36.3336	Hepatocytes
P3TLH_CTGTTTATCGGAAACG_1	-69.053	-3.28798	Macrophage
P2TLH_TAGACCACATGGATGG_1	-2.7654	41.8089	B_cells
P2TLH_TTCTACAGTTCAGACT_1	5.17972	72.1271	T_NK
P3TLH_TCGCGAGGTCGCATAT_1	2.6487	-21.6546	Hepatocytes
P5TLH_AGAATAGTCCTGCCAT_1	15.2815	23.1576	T_NK
P3TLH_AGTGTCAGTATTACCG_1	-21.446	-21.0547	Hepatocytes
P2TLH_TTAGGCATCTGACCTC_1	-17.3669	29.9275	B_cells
P3TLH_GACACGCTCCAGTAGT_1	-5.60838	-23.144	Hepatocytes
P3TLH_ATCTGCCGTACATCCA_1	22.1818	-58.3683	Hepatocytes
P3TLH_ATTTCTGTCTCTTGAT_1	23.4212	-7.47526	Hepatocytes
P3TLH_CGCCAAGGTACTCAAC_1	-1.16914	-24.6655	Hepatocytes
P2TLH_CTCACACTCTGACCTC_1	-34.9897	-60.4817	Hepatocytes
P4TLH_ATTATCCTCTCTGAGA_1	-39.4006	56.8989	Periportal_LSECs
P3TLH_GATGAGGAGAACAACT_1	-72.5441	-3.14734	Macrophage
P5TLH_ACGCAGCAGCTGCGAA_1	22.2203	36.0359	T_NK
P4TLH_TGGTTCCCAAACGCGA_1	-43.5466	55.8832	Central_venous_LSECs
P3TLH_GATGAGGGTGTGACGA_1	-18.6524	-23.1557	Hepatocytes
P2TLH_ACTGATGGTTGCGCAC_1	-34.1206	-61.4871	Hepatocytes
P2TLH_GTTCTCGTCGTAGATC_1	-45.9765	-52.4684	Hepatocytes
P2TLH_CAGCAGCCATTCTTAC_1	-67.1729	18.7951	Macrophage
P4TLH_AGGTCATAGGGCTTCC_1	-32.7715	71.2872	Periportal_LSECs
P4TLH_ACGCCAGTCAACCATG_1	-40.7219	50.8649	Central_venous_LSECs
P3TLH_CACACTCTCGGCGGTT_1	33.6932	-14.2261	Hepatocytes
P3TLH_GTCGTAAAGAAACGAG_1	31.2905	-1.44056	Hepatocytes
P5TLH_TGGCTGGCAATACGCT_1	46.6706	10.2246	T_NK
P5TLH_CTAATGGAGGCCCTTG_1	67.5188	-5.13901	T_NK
P2TLH_AGTCTTTAGCTGGAAC_1	-5.38242	31.3392	B_cells
P3TLH_CCTAGCTCACGGACAA_1	32.1787	-43.898	Hepatocytes
P3TLH_CTGAAACAGATATACG_1	32.12	-30.203	Hepatocytes
P1TLH_TACGGTAAGTGTGGCA_1	52.9615	31.4832	T_NK
P3TLH_CGCTTCACACACCGAC_1	28.5772	-25.1706	Hepatocytes
P1TLH_AGACGTTAGTCGCCGT_1	-60.5239	-28.7083	Macrophage
P1TLH_GCTTGAATCGCCTGTT_1	35.3193	67.3447	T_NK
P5TLH_CTCACACAGCTAACTC_1	11.6815	-68.4766	Hepatocytes
P2TLH_CATCAGAAGTTACGGG_1	-34.8338	63.4095	Periportal_LSECs
P4TLH_TCCCGATCATCATCCC_1	-59.4418	-3.26445	Macrophage
P3TLH_GTTACAGAGGCTAGGT_1	33.3763	-10.3053	Hepatocytes
P5TLH_TACCTATCAGTTCCCT_1	0.702589	-66.7391	Hepatocytes
P3TLH_AACCATGCATTACCTT_1	33.2898	-23.3187	Hepatocytes
P5TLH_GATCGCGCAATGTTGC_1	11.1768	-69.4411	Hepatocytes
P2TLH_TTAGGACCAAAGTCAA_1	-52.501	15.3913	Macrophage
P3TLH_ACTGTCCCATCAGTCA_1	-0.492481	-32.2756	Hepatocytes
P2TLH_CTTTGCGTCCACGAAT_1	-4.17355	24.2351	B_cells
P3TLH_ACTTTCATCAGTACGT_1	-73.6673	-6.32829	Macrophage
P2TLH_TGCCCTATCTTACCGC_1	-36.7102	-52.4902	Hepatocytes
P5TLH_CAAGAAAAGGCAGTCA_1	33.8931	27.3611	T_NK
P2TLH_TGGCGCACATCACGAT_1	0.784257	31.0393	B_cells
P3TLH_CCTATTAGTAGGAGTC_1	27.1534	-51.2262	Hepatocytes
P3TLH_GGAACTTAGCTTATCG_1	37.8566	-6.83059	Hepatocytes
P3TLH_CCTCAGTGTTGGTGGA_1	-22.5024	-20.6924	Hepatocytes
P5TLH_TTAACTCGTTGGTTTG_1	33.2518	23.0653	T_NK
P3TLH_CACCAGGGTCCGAACC_1	-13.1993	-23.8009	Hepatocytes
P3TLH_GGATGTTTCTTTACGT_1	27.2482	-30.3582	Hepatocytes
P3TLH_CCTACACTCTTATCTG_1	6.34906	-10.5059	Hepatocytes
P5TLH_AGGTCATAGTGACTCT_1	21.5038	34.8462	T_NK
P3TLH_GTAACTGTCCTAGTGA_1	16.5778	-16.3085	Hepatocytes
P3TLH_GCCAAATCACACGCTG_1	-72.1887	-5.88378	Macrophage
P5TLH_GTGCTTCGTCTCCCTA_1	-27.518	57.572	Periportal_LSECs
P3TLH_TTCCCAGTCCGTAGGC_1	14.5225	-16.5399	Hepatocytes
P5TLH_CTAATGGTCATCATTC_1	46.9143	9.17282	T_NK
P5TLH_TGACTTTCATGTAGTC_1	-28.1717	58.4775	Periportal_LSECs
P4TLH_GGGCACTCAGTAGAGC_1	68.7366	21.8971	T_NK
P2TLH_TTCCCAGCAGATGAGC_1	-37.6904	-53.3529	Hepatocytes
P2TLH_GGACGTCTCGGAGCAA_1	-28.3168	-51.4763	Hepatocytes
P5TLH_CCTTACGCACACGCTG_1	32.0313	27.7623	T_NK
P2TLH_CTGCGGAGTTCCGGCA_1	-38.7534	-63.241	Hepatocytes
P1TLH_AACACGTCATTAACCG_1	44.3208	64.74	T_NK
P2TLH_GTAGTCACAAGGTTCT_1	-38.787	-60.4278	Hepatocytes
P5TLH_ACTGTCCGTTACCGAT_1	-47.3666	-10.5999	Macrophage
P3TLH_CGGAGTCGTCGGGTCT_1	30.6377	-24.8261	Hepatocytes
P3TLH_CACTCCATCTGGCGAC_1	1.34856	-30.9681	Hepatocytes
P5TLH_GATGAAAGTCTTCTCG_1	69.4428	-5.21339	T_NK
P3TLH_GCTTCCAGTGCACCAC_1	11.8409	-2.78684	Hepatocytes
P5TLH_TCAGGTATCCAATGGT_1	63.8148	-4.7964	T_NK
P3TLH_AAGGCAGCAGACAAAT_1	19.2278	-2.89693	Hepatocytes
P3TLH_GATGCTATCGGTTAAC_1	34.5017	-4.88434	Hepatocytes
P5TLH_GATGAAAGTAGCGTCC_1	-57.9059	-2.39348	Macrophage
P4TLH_CTAACTTCAATCGGTT_1	27.7377	50.8803	T_NK
P2TLH_AGAGTGGAGGATGCGT_1	-1.53331	20.1237	B_cells
P1TLH_TTGCCGTAGCACACAG_1	49.3385	28.9507	T_NK
P2TLH_CGAATGTAGGCAGTCA_1	-48.3665	-56.8852	Hepatocytes
P3TLH_AGCTCCTCATGTCTCC_1	8.09245	-8.36916	Hepatocytes
P5TLH_TAGCCGGGTTCGTGAT_1	-28.4843	55.5658	Periportal_LSECs
P1TLH_TACTCATTCAGCTTAG_1	-2.03438	-77.2526	Hepatocytes
P3TLH_TTTGCGCAGAGATGAG_1	6.2153	-6.80556	Hepatocytes
P4TLH_CCGTTCACAGGTTTCA_1	60.3296	37.0782	T_NK
P2TLH_AACTCCCGTGAAATCA_1	-36.6175	53.0441	Central_venous_LSECs
P4TLH_CTGTGCTCAACTTGAC_1	25.8008	48.5708	T_NK
P4TLH_CGCTTCATCTGAGGGA_1	55.7872	38.3972	T_NK
P1TLH_AAATGCCAGAGATGAG_1	-45.4691	46.1145	Central_venous_LSECs
P2TLH_CGCTTCATCCTAAGTG_1	-48.2768	-51.7196	Hepatocytes
P5TLH_CACAAACAGCCAGTAG_1	-26.8653	61.6982	Periportal_LSECs
P2TLH_CGGACGTGTATTCTCT_1	-29.7615	-58.0365	Hepatocytes
P3TLH_TCCCGATAGAAGGCCT_1	15.8122	-21.2636	Hepatocytes
P3TLH_GGACGTCCAAGAGGCT_1	-5.83423	-11.9467	Hepatocytes
P2TLH_GTTCGGGGTCATATGC_1	-28.9958	-65.7504	Hepatocytes
P3TLH_CGTCAGGCATCGGACC_1	20.1633	-8.67522	Hepatocytes
P3TLH_CGACCTTAGACAATAC_1	8.38875	-34.3746	Hepatocytes
P3TLH_GCATGTATCCGTACAA_1	-4.76335	41.7522	B_cells
P2TLH_GGAGCAAGTCCAACTA_1	-50.5454	-55.7271	Hepatocytes
P3TLH_GAAATGATCAGCGATT_1	10.7383	-3.80768	Hepatocytes
P3TLH_TCAGGATCACATCCGG_1	15.3742	-6.32231	Hepatocytes
P3TLH_CCTCAGTCACCTGGTG_1	-15.7297	-7.84602	Hepatocytes
P3TLH_TGAGAGGCAAGACACG_1	35.8263	-54.0584	Hepatocytes
P3TLH_CGGACTGCAGTAAGAT_1	-25.3334	14.984	Cholangiocytes
P5TLH_GTAACTGGTGTCGCTG_1	47.4549	7.74458	T_NK
P5TLH_GAAACTCAGGCGTACA_1	67.362	-5.07752	T_NK
P4TLH_CGGAGCTTCCGCAGTG_1	-38.3001	43.6498	Central_venous_LSECs
P4TLH_GGCCGATAGCCACGTC_1	-58.2938	12.9245	Macrophage
P4TLH_CATATGGCAAAGTCAA_1	58.0619	24.5971	T_NK
P3TLH_AAGACCTAGTGTACTC_1	30.8066	-52.3439	Hepatocytes
P3TLH_GCATGTAAGAGCCCAA_1	32.215	-10.356	Hepatocytes
P3TLH_TAAGCGTTCGTACGGC_1	-6.51272	-13.7963	Hepatocytes
P3TLH_TCTGGAATCCAAGCCG_1	-8.13638	-18.7702	Hepatocytes
P4TLH_GACACGCCAAGTTGTC_1	-29.1883	71.3207	Periportal_LSECs
P3TLH_ATGGGAGGTTTACTCT_1	-78.1046	-5.42336	Macrophage
P3TLH_TACTCATCACACAGAG_1	23.6667	-9.87939	Hepatocytes
P3TLH_TAGGCATGTGCTCTTC_1	-20.0586	-24.3706	Hepatocytes
P5TLH_ACGGCCACACTTCGAA_1	31.7291	26.9685	T_NK
P5TLH_ATGCGATAGGCATGTG_1	46.2573	14.9438	T_NK
P2TLH_CTCTACGAGCAACGGT_1	-3.98703	19.8487	B_cells
P5TLH_CTCCTAGGTAAGGATT_1	8.72071	-71.264	Hepatocytes
P5TLH_AGTAGTCCAGGTCGTC_1	34.6314	33.7847	T_NK
P3TLH_GTCACGGTCAAACCAC_1	-1.22659	34.2193	B_cells
P5TLH_CTGATCCGTACTTCTT_1	-29.7233	65.9787	Periportal_LSECs
P3TLH_AATCCAGTCCGCGCAA_1	28.8508	-60.4474	Hepatocytes
P4TLH_CCATTCGAGATCTGCT_1	57.572	37.0151	T_NK
P3TLH_TTGACTTGTTCCCGAG_1	8.98768	-36.1383	Hepatocytes
P3TLH_TCAGGATAGGCAATTA_1	-22.9735	-23.622	Hepatocytes
P2TLH_TCGAGGCAGTTCCACA_1	-1.50541	29.5727	B_cells
P2TLH_AACCATGGTCCGTGAC_1	-27.5475	66.3866	Periportal_LSECs
P5TLH_AAGGCAGAGTATCGAA_1	65.6549	3.30474	T_NK
P2TLH_GTTCTCGAGTCCAGGA_1	-29.6688	-65.0394	Hepatocytes
P2TLH_CGTCAGGAGAGCTTCT_1	-54.9653	17.7777	Macrophage
P5TLH_GAGGTGATCACCGTAA_1	0.548597	65.158	B_cells
P1TLH_GTTCTCGAGAGACTAT_1	-45.1777	43.5201	Central_venous_LSECs
P4TLH_CTACCCAGTCAAAGCG_1	-39.8448	50.2415	Central_venous_LSECs
P1TLH_GCTTCCAAGGCGATAC_1	-59.4463	-26.381	Macrophage
P3TLH_CTTTGCGGTTACGGAG_1	-24.2405	-23.2667	Hepatocytes
P4TLH_TCAGGATAGCCGCCTA_1	-58.3145	-15.8315	Macrophage
P5TLH_ACTGCTCAGGTGCTAG_1	-48.6838	-18.0775	Macrophage
P3TLH_CGATCGGTCACAGTAC_1	35.5059	-9.99381	Hepatocytes
P4TLH_AAGGCAGAGACAGGCT_1	-60.0167	11.0595	Macrophage
P4TLH_AGTGTCATCGTACCGG_1	69.9663	18.6785	T_NK
P3TLH_GAAACTCGTCCGTGAC_1	15.3428	-11.6076	Hepatocytes
P5TLH_GACGTTAGTATATGGA_1	30.392	37.737	T_NK
P4TLH_GTGCTTCGTATATCCG_1	-3.25905	32.047	B_cells
P4TLH_CTGAAACAGGACACCA_1	-62.1363	-5.5975	Macrophage
P3TLH_CCCAGTTAGGAGCGTT_1	22.5295	-40.6518	Hepatocytes
P3TLH_TTCGAAGTCTACGAGT_1	-51.1741	5.02166	Macrophage
P2TLH_CCCTCCTTCTTCCTTC_1	-19.4736	-57.412	Hepatocytes
P5TLH_AGGCCACCAGAGCCAA_1	-28.2957	53.7012	Periportal_LSECs
P2TLH_CCTTCGAAGGCGCTCT_1	-31.0192	-67.2923	Hepatocytes
P3TLH_AGACGTTGTAAGAGAG_1	23.4646	-20.7273	Hepatocytes
P5TLH_TCTGAGAAGATCCTGT_1	46.6826	11.7251	T_NK
P3TLH_GACACGCCAAATCCGT_1	26.9177	-14.5863	Hepatocytes
P3TLH_AGATTGCGTCAACATC_1	-12.3988	-16.4478	Hepatocytes
P5TLH_CGTTCTGTCATCTGTT_1	-31.2996	17.7156	Cholangiocytes
P1TLH_AAAGCAAGTCGCGTGT_1	32.4312	62.7276	T_NK
P5TLH_TTTGTCATCGGCATCG_1	-0.165832	67.31	B_cells
P1TLH_GTGCGGTCATGGTTGT_1	-64.0767	-25.558	Macrophage
P3TLH_CGCGTTTAGATCACGG_1	25.1293	-13.1253	Hepatocytes
P5TLH_GTCCTCATCCAAACAC_1	33.5287	33.5113	T_NK
P3TLH_TCTTCGGGTCTAGTCA_1	-70.0708	-3.1751	Macrophage
P1TLH_AAAGCAAGTTGATTCG_1	-58.883	-26.6087	Macrophage
P2TLH_TTCTTAGGTAGGAGTC_1	-34.9582	-63.1069	Hepatocytes
P2TLH_CTTAACTCACCTATCC_1	-11.4596	23.6291	B_cells
P3TLH_GTTACAGAGGCCCTTG_1	-16.4899	-8.91103	Hepatocytes
P1TLH_CTCGGGACAAAGGAAG_1	-4.77914	-84.8594	Hepatocytes
P5TLH_TACCTTATCTTCTGGC_1	-17.2126	31.8666	B_cells
P1TLH_TGGGAAGGTTTAAGCC_1	-52.4869	24.3744	Macrophage
P2TLH_ACAGCCGCACAGATTC_1	-34.3358	48.4741	Central_venous_LSECs
P3TLH_CACCTTGAGTGTCTCA_1	-21.446	-7.06111	Hepatocytes
P3TLH_CGGAGTCGTAGAGCTG_1	5.64685	-24.8828	Hepatocytes
P5TLH_GAATGAACACAGAGGT_1	45.0474	12.8476	T_NK
P5TLH_CTAGCCTTCACCACCT_1	2.87484	72.7867	B_cells
P3TLH_GATGAGGCATTCACTT_1	-8.82717	-27.4231	Hepatocytes
P3TLH_GTGAAGGAGGCACATG_1	-68.3362	2.12476	Macrophage
P4TLH_GCTGCGATCTGATACG_1	-62.4271	11.3133	Macrophage
P5TLH_ATCTGCCGTCAGAATA_1	-52.7702	-19.5778	Macrophage
P3TLH_ATCTACTGTATAAACG_1	37.8212	-36.6346	Hepatocytes
P5TLH_CGGACTGTCAGTACGT_1	-27.5593	63.0325	Periportal_LSECs
P2TLH_GAGGTGAAGACTGTAA_1	-30.7571	-63.9789	Hepatocytes
P5TLH_GGATGTTAGAGCCTAG_1	-59.5631	16.3865	Macrophage
P3TLH_TGTGTTTCAGACAAGC_1	15.9788	0.951381	Hepatocytes
P3TLH_GAACCTATCTGAGTGT_1	23.6347	-27.6262	Hepatocytes
P2TLH_CTGTGCTCAAGTACCT_1	-1.8159	31.4067	B_cells
P3TLH_CGAGAAGAGTGGCACA_1	21.661	-52.4024	Hepatocytes
P1TLH_TGTGTTTAGCGTCAAG_1	78.6912	9.06575	T_NK
P4TLH_CAACTAGGTCCTAGCG_1	-9.39178	35.6244	B_cells
P1TLH_CCTACACGTTTGTTGG_1	-38.5134	40.8746	Central_venous_LSECs
P3TLH_TGCGCAGCACAAGCCC_1	6.08668	-38.241	Hepatocytes
P1TLH_TACCTATGTAGAAGGA_1	-14.6188	37.4076	B_cells
P4TLH_TGACTTTCAGCTCCGA_1	68.4454	24.0044	T_NK
P1TLH_CGAGAAGGTTATGCGT_1	-1.27253	-80.1193	Hepatocytes
P3TLH_ACGAGCCCACATTAGC_1	-46.8083	5.52502	Macrophage
P2TLH_TCTCATAAGGACCACA_1	-30.9216	-59.8395	Hepatocytes
P5TLH_TGGCGCAGTCGCTTCT_1	-52.1423	-12.8785	Macrophage
P5TLH_GATGCTAGTCTCTTTA_1	2.49029	70.7587	B_cells
P3TLH_CCTTCGAAGCCTATGT_1	25.0902	-60.0328	Hepatocytes
P2TLH_GATCTAGCAGATAATG_1	-56.1993	15.4119	Macrophage
P2TLH_ACGAGCCCAGCCTTGG_1	7.04145	68.6797	B_cells
P5TLH_GATCGCGCATCCAACA_1	63.5393	-1.005	T_NK
P5TLH_AGCGTCGTCATAAAGG_1	21.7294	39.0468	T_NK
P4TLH_TGCCCATTCTAACTTC_1	40.8905	49.2485	T_NK
P2TLH_ACTATCTGTCGGCTCA_1	-20.0932	-56.8646	Hepatocytes
P3TLH_AAACCTGCAGTCAGCC_1	36.9148	-38.1283	Hepatocytes
P3TLH_TGGCCAGGTCTAACGT_1	11.4509	-11.0481	Hepatocytes
P1TLH_CAACCAACAATCCGAT_1	37.3232	54.4354	T_NK
P5TLH_CTCGTCACAAGCGATG_1	10.8802	-71.7933	Hepatocytes
P3TLH_TTATGCTTCAGTTAGC_1	9.19813	-40.9089	Hepatocytes
P3TLH_TGCTGCTTCACTCCTG_1	-8.95431	-36.227	Hepatocytes
P4TLH_GATCGTAGTCTTTCAT_1	66.6771	24.4043	T_NK
P5TLH_TATCTCAAGAGATGAG_1	41.4118	10.2235	T_NK
P1TLH_CCGTGGAAGTTGAGAT_1	-63.8188	-23.0234	Macrophage
P5TLH_ACTGCTCGTTGGTAAA_1	63.8228	6.19726	T_NK
P4TLH_AAAGATGAGGACGAAA_1	-58.1841	11.8023	Macrophage
P4TLH_GCAGTTATCTCTAGGA_1	67.9486	21.5326	T_NK
P5TLH_GCATACAAGCCAGAAC_1	64.5908	-1.50646	T_NK
P2TLH_AGGGATGCAACACCTA_1	-3.97939	21.4636	B_cells
P3TLH_GCGCCAACACCTCGTT_1	32.9741	-29.7302	Hepatocytes
P1TLH_AGCCTAACAAGGTTCT_1	-0.698902	-82.0553	Hepatocytes
P1TLH_CATCGGGCACATTCGA_1	-50.3407	1.87794	Macrophage
P5TLH_TCTCTAAAGAAGGACA_1	7.69546	-73.4816	Hepatocytes
P3TLH_CGAACATCATGCCTTC_1	18.9343	3.77155	Hepatocytes
P2TLH_GATGCTAAGAAAGTGG_1	-37.3678	-53.2267	Hepatocytes
P3TLH_CCCATACCACGTGAGA_1	-12.9017	-19.0223	Hepatocytes
P3TLH_GAGGTGAAGCCCAATT_1	11.9871	-23.6711	Hepatocytes
P3TLH_CTTTGCGGTGTCGCTG_1	-11.5142	-28.1877	Hepatocytes
P1TLH_CAAGTTGAGTAGATGT_1	-62.2026	-26.7954	Macrophage
P3TLH_GTACTTTAGTACATGA_1	26.429	-47.527	Hepatocytes
P5TLH_AAAGTAGCAAGGTTCT_1	-50.4933	-12.6344	Macrophage
P2TLH_AACTGGTCACTGTGTA_1	-27.2171	-52.2314	Hepatocytes
P2TLH_AGAGCGAAGCCCAATT_1	-23.0702	-70.9718	Hepatocytes
P5TLH_GCGCCAATCGTAGGAG_1	-49.8724	-16.7307	Macrophage
P5TLH_CACACTCCATTACCTT_1	61.6825	4.45955	T_NK
P1TLH_TAGTGGTAGGCCCGTT_1	-73.8099	10.8171	Macrophage
P2TLH_ATTTCTGAGGAGTTGC_1	-29.7989	68.8006	Periportal_LSECs
P5TLH_TCTTTCCCATTCACTT_1	-26.0679	63.4056	Periportal_LSECs
P5TLH_CAGCAGCCATAGGATA_1	0.251894	64.276	B_cells
P4TLH_CAGTAACGTCTAGCGC_1	-61.7582	6.13111	Macrophage
P3TLH_GTATTCTTCAAGGTAA_1	-0.0148938	-11.0261	Hepatocytes
P2TLH_CAAGGCCAGTCGATAA_1	-29.8976	-57.13	Hepatocytes
P5TLH_CTGCTGTTCTCTGCTG_1	64.119	3.61321	T_NK
P4TLH_GGCCGATAGCCACTAT_1	-63.5227	10.71	Macrophage
P1TLH_GGGTCTGGTCTCCCTA_1	78.0177	9.07165	T_NK
P1TLH_CTTAGGAGTACACCGC_1	31.6913	67.1442	T_NK
P4TLH_TTAGTTCTCGCGCCAA_1	70.5114	23.7587	T_NK
P3TLH_CTGCTGTCAGTCTTCC_1	-6.01804	42.4344	B_cells
P2TLH_GAGTCCGCACGTTGGC_1	-5.08149	20.374	B_cells
P3TLH_CACAGTAAGAGCTTCT_1	37.1341	-51.904	Hepatocytes
P5TLH_GCTCTGTAGCTCTCGG_1	71.6472	-5.23612	T_NK
P3TLH_GGGTTGCGTCATTAGC_1	2.32825	-40.6691	Hepatocytes
P3TLH_GGATTACGTTCAGACT_1	6.14677	-38.3364	Hepatocytes
P5TLH_TATCTCAGTGGTCTCG_1	0.192821	70.2768	B_cells
P3TLH_CATGACACATAGACTC_1	-29.1423	19.1272	Cholangiocytes
P4TLH_CCTAGCTGTCAACATC_1	7.9825	-63.6208	Hepatocytes
P5TLH_ACATCAGGTGGTAACG_1	45.478	8.51899	T_NK
P2TLH_GGCGTGTCAATGCCAT_1	-37.0169	-60.5689	Hepatocytes
P3TLH_TCATTTGAGAGCCCAA_1	25.6622	-39.8054	Hepatocytes
P4TLH_TAGACCATCCTTCAAT_1	-37.4907	39.4479	Central_venous_LSECs
P3TLH_CGACCTTAGATGCCAG_1	32.9532	-5.61039	Hepatocytes
P2TLH_ACGCCAGGTAGCTCCG_1	-46.2664	-57.0402	Hepatocytes
P4TLH_GTGCATAGTGCTAGCC_1	30.6327	41.996	T_NK
P1TLH_TTCGGTCTCCGAGCCA_1	33.3808	64.4904	T_NK
P3TLH_TTGGAACCAGGCTGAA_1	-19.3196	-3.87045	Hepatocytes
P5TLH_TTGCGTCGTCATGCCG_1	-8.07317	40.8976	B_cells
P2TLH_TGCCAAAAGCGTTCCG_1	-34.4383	-62.257	Hepatocytes
P1TLH_CGGCTAGGTTAAGTAG_1	40.9632	60.9824	T_NK
P4TLH_TACACGAAGCAGGTCA_1	-61.6026	-16.2319	Macrophage
P1TLH_ACGGCCAGTCTAGTGT_1	-34.2095	47.3319	Central_venous_LSECs
P3TLH_CAGCATAGTCGTCTTC_1	-10.7141	-30.366	Hepatocytes
P3TLH_CAAGAAAAGTACGCGA_1	-26.0686	73.5564	Periportal_LSECs
P1TLH_GGGCATCCATGGTAGG_1	-32.9835	24.5339	Macrophage
P5TLH_CTGTGCTGTCATACTG_1	-54.724	2.25639	Macrophage
P3TLH_CTTACCGAGTTGTAGA_1	-42.7115	-3.14038	Macrophage
P3TLH_GGGATGACACGGTAGA_1	-13.5761	-25.5378	Hepatocytes
P4TLH_ATTACTCCACGAAAGC_1	71.9551	35.9771	T_NK
P3TLH_TTTGGTTAGTTCGCAT_1	20.0376	-25.2924	Central_venous_LSECs
P3TLH_TGACTAGTCCTTTCTC_1	28.9087	-4.0872	Hepatocytes
P2TLH_GTTACAGAGCAATATG_1	-38.6161	-59.1352	Hepatocytes
P5TLH_ACTGAACTCAACACGT_1	4.75131	72.2396	B_cells
P3TLH_CGAGAAGCATACAGCT_1	-5.96836	42.3671	B_cells
P1TLH_CAGCTGGCAGTTCATG_1	-51.1225	19.9956	Macrophage
P5TLH_ATGAGGGAGGAACTGC_1	-56.1195	2.57362	Macrophage
P2TLH_GTCATTTTCTTGTTTG_1	-44.3492	10.2107	Macrophage
P5TLH_GTATCTTAGACCCACC_1	-51.8925	-17.8673	Macrophage
P5TLH_CCTCAGTTCTCCAGGG_1	11.9705	-73.5267	Hepatocytes
P4TLH_CCTTTCTTCGGAGCAA_1	-11.3897	36.3924	B_cells
P1TLH_CTGATAGTCGGTCCGA_1	-50.5329	-2.45002	Macrophage
P3TLH_GAAGCAGGTAGCGCTC_1	-18.5433	-2.97744	Hepatocytes
P2TLH_TAGAGCTGTTATGTGC_1	-10.4216	22.1926	B_cells
P1TLH_CTGCCTATCATTTGGG_1	-51.2544	-2.36477	Macrophage
P5TLH_CGGAGTCAGATGTGGC_1	14.1426	22.7016	T_NK
P2TLH_CGCGTTTTCATTGCGA_1	-39.618	-62.0611	Hepatocytes
P2TLH_GAAACTCTCTGTCTAT_1	-13.3461	28.7789	B_cells
P5TLH_CAAGGCCCATGATCCA_1	-27.1855	56.935	Periportal_LSECs
P2TLH_CGCGGTAGTCTCCATC_1	-28.1768	14.0294	Cholangiocytes
P3TLH_CTCGTCAGTAGGCATG_1	2.33395	-28.5815	Hepatocytes
P3TLH_CAAGATCGTAGGCTGA_1	25.1468	-10.3973	Hepatocytes
P2TLH_CAACCAATCACCATAG_1	-28.718	-64.0077	Hepatocytes
P3TLH_CATGACAGTAAATACG_1	12.5726	-31.9079	Hepatocytes
P5TLH_ACGTCAACAGGCTCAC_1	21.8184	21.4818	T_NK
P1TLH_CACTCCATCGGCTTGG_1	-57.1156	-22.895	Macrophage
P1TLH_GCCTCTAGTCCTGCTT_1	-50.2295	-1.93245	Macrophage
P5TLH_CACAGTAAGCGGCTTC_1	-40.8933	47.8812	Central_venous_LSECs
P3TLH_GCGCAGTAGCTCCTCT_1	-3.49662	-35.2302	Hepatocytes
P1TLH_GTGAAGGGTGGTCCGT_1	-59.6845	-28.4397	Macrophage
P5TLH_GGCGTGTCAGTCCTTC_1	-53.6856	-18.3135	Macrophage
P4TLH_CCTTCCCCACTAAGTC_1	55.0558	37.8365	T_NK
P4TLH_ACTGTCCTCTGAGTGT_1	73.2582	28.4854	T_NK
P4TLH_GCTCTGTAGCGATGAC_1	-14.1684	24.8992	B_cells
P3TLH_TCGTACCAGCCACGTC_1	-18.3896	-2.12504	Hepatocytes
P5TLH_ACACCAATCTTGTATC_1	67.4324	-3.11561	T_NK
P4TLH_CACAGTATCAGCACAT_1	62.583	24.9667	T_NK
P4TLH_CATCGGGAGGCTATCT_1	70.1054	20.8586	T_NK
P5TLH_TAGCCGGCAGTATAAG_1	-53.2271	-16.3812	Macrophage
P5TLH_TGGTTCCGTGTGGTTT_1	25.987	33.2893	T_NK
P3TLH_GAGCAGAAGTTAGGTA_1	16.481	-42.4112	Hepatocytes
P3TLH_GTCTCGTGTACTTAGC_1	13.1152	-25.7917	Hepatocytes
P4TLH_GTTCATTCACAGAGGT_1	3.03547	66.5548	B_cells
P4TLH_TTGGCAATCATTGCGA_1	-63.8489	-8.10184	Macrophage
P5TLH_ACATCAGAGCCAGTTT_1	34.5807	21.3275	T_NK
P2TLH_TTCGAAGAGCCACCTG_1	-36.6442	-63.2384	Hepatocytes
P5TLH_CCAATCCAGTGGGTTG_1	-14.2539	40.1161	B_cells
P5TLH_TATCTCATCAGTCAGT_1	29.4101	33.1259	T_NK
P4TLH_AGCAGCCCATTGGGCC_1	-64.5435	11.2504	Macrophage
P3TLH_ATCGAGTTCACCACCT_1	29.0835	-56.9094	Hepatocytes
P1TLH_CCACCTAAGGCAGTCA_1	-52.8422	24.9408	Macrophage
P3TLH_CATGCCTCAATGTAAG_1	22.8583	-58.3288	Hepatocytes
P4TLH_GTAGTCAGTGCGCTTG_1	72.8296	27.8482	T_NK
P4TLH_CACATAGCACCCTATC_1	31.5652	34.5085	T_NK
P5TLH_GCAGCCAGTACGCACC_1	21.3758	34.9068	T_NK
P3TLH_CGATGTAGTGAAATCA_1	19.5955	-50.9584	Hepatocytes
P5TLH_GAAACTCCACCCATGG_1	10.1187	-70.442	Hepatocytes
P4TLH_ACCCACTTCGGATGTT_1	22.5542	51.8191	T_NK
P5TLH_CCATGTCAGAAACGAG_1	-50.925	-9.23535	Macrophage
P5TLH_CCCTCCTCACATGTGT_1	24.725	20.6435	T_NK
P3TLH_TTTCCTCTCAGCACAT_1	7.48226	-41.8953	Hepatocytes
P1TLH_AAGGCAGCAGCAGTTT_1	-41.3032	39.405	Central_venous_LSECs
P3TLH_CTCCTAGCAGATTGCT_1	17.6866	-40.9312	Hepatocytes
P2TLH_TGCGGGTGTAAGTGGC_1	-45.172	-47.4782	Hepatocytes
P5TLH_GTATTCTGTGGTCTCG_1	1.45754	64.001	B_cells
P3TLH_GTCACGGAGTATTGGA_1	-1.39679	-15.7987	Hepatocytes
P3TLH_CTGAAACAGGTTCCTA_1	-1.11112	34.1803	B_cells
P5TLH_AAGACCTGTTTAGGAA_1	-49.4862	-20.1184	Macrophage
P5TLH_AAACCTGCAGTTCATG_1	49.0168	10.5356	T_NK
P3TLH_GATCGTAGTGTGCCTG_1	8.94195	-36.4168	Hepatocytes
P4TLH_GTCCTCATCAAAGACA_1	56.1989	21.6185	T_NK
P3TLH_CACAGTATCATCTGCC_1	5.7086	-23.2216	Hepatocytes
P4TLH_GAGTCCGTCGAGGTAG_1	22.0471	48.8518	T_NK
P5TLH_CTGCTGTTCAGATAAG_1	31.4385	26.8592	T_NK
P4TLH_TGATTTCGTCGAAAGC_1	68.9407	22.63	T_NK
P1TLH_TAGGCATTCTTCGAGA_1	44.6723	57.7607	T_NK
P5TLH_TCAATCTTCAGTACGT_1	-57.5898	-2.3469	Macrophage
P4TLH_GGCTGGTGTGTTAAGA_1	37.2534	43.7473	T_NK
P5TLH_ATGCGATTCATAGCAC_1	27.549	33.8953	T_NK
P2TLH_ACGGCCATCTACCAGA_1	-48.1937	-55.6767	Hepatocytes
P3TLH_ATCTACTAGTGCCATT_1	28.9747	-35.3177	Hepatocytes
P4TLH_GTAACGTAGGCATGGT_1	16.6417	52.5598	T_NK
P1TLH_GTTTCTAAGGGTTCCC_1	-57.4643	-10.2818	Macrophage
P1TLH_CACAGTAGTCTGGAGA_1	-42.5085	44.4493	Central_venous_LSECs
P4TLH_TGCACCTGTTGCTCCT_1	-60.5472	-3.49137	Macrophage
P5TLH_AACTCAGCACAGCGTC_1	13.9958	23.7763	T_NK
P3TLH_CAACCTCAGGCCCTTG_1	-5.21816	-30.1471	Hepatocytes
P3TLH_GATGAGGTCCAGTATG_1	38.8721	-17.4055	Hepatocytes
P3TLH_GGGACCTTCCACTCCA_1	8.99163	-5.95051	Hepatocytes
P3TLH_TCCCGATCACCTTGTC_1	-73.7147	-4.10636	Macrophage
P5TLH_TGACTAGCATACTACG_1	45.379	9.7046	T_NK
P3TLH_CCACCTAAGGAGTACC_1	28.4186	0.427274	Hepatocytes
P3TLH_CGTGTAAAGGACCACA_1	-7.7985	-11.3256	Hepatocytes
P5TLH_CAGGTGCGTAGCGCTC_1	-59.0039	15.5423	Macrophage
P3TLH_TACACGAGTCTCCACT_1	-22.6998	-6.63305	Hepatocytes
P3TLH_TGAAAGAGTGTGGCTC_1	20.9958	-48.9162	Hepatocytes
P1TLH_CACATAGGTCTAGTGT_1	-55.3453	21.8204	Macrophage
P3TLH_CTCCTAGCATGAGCGA_1	-7.55317	-34.7251	Hepatocytes
P3TLH_AGTTGGTGTTCATGGT_1	-26.8391	16.3255	Cholangiocytes
P3TLH_ACTTTCACAGGGATTG_1	4.6043	-40.7141	Hepatocytes
P3TLH_CAGCCGATCCAGATCA_1	20.437	-31.5491	Hepatocytes
P3TLH_GCATACAAGTGATCGG_1	34.4921	-19.5189	Hepatocytes
P5TLH_GTCGGGTCAACAACCT_1	44.7349	11.4151	T_NK
P2TLH_TACTCGCGTCAAACTC_1	-3.10306	26.8101	B_cells
P5TLH_GGGAGATAGACTTGAA_1	17.8434	21.1818	T_NK
P3TLH_CTTTGCGCACCGGAAA_1	32.1768	-57.7326	Hepatocytes
P5TLH_GGTGCGTTCACAAACC_1	47.8785	13.5932	T_NK
P2TLH_TCGCGAGGTAGATTAG_1	-31.1338	-63.5401	Hepatocytes
P5TLH_CCGTACTAGCCACGTC_1	31.097	19.8229	T_NK
P2TLH_CCGTACTTCGCTTGTC_1	-1.63735	31.3297	B_cells
P5TLH_CGGACACTCCCTAATT_1	-72.3181	10.1777	Macrophage
P4TLH_AGCCTAACAACTTGAC_1	-58.4943	-14.1179	Macrophage
P4TLH_TTAACTCTCCGTACAA_1	-25.2468	64.6854	Periportal_LSECs
P5TLH_GGTGCGTCAACTGGCC_1	24.814	36.7331	T_NK
P1TLH_GTCACGGAGTACGCGA_1	33.8054	54.4241	T_NK
P3TLH_ACTATCTTCGGCATCG_1	15.3174	1.85924	Hepatocytes
P2TLH_GGACAAGAGTTAAGTG_1	-33.4487	-58.4671	Hepatocytes
P3TLH_CGTTGGGAGTTACGGG_1	30.2557	-55.7905	Hepatocytes
P5TLH_CCCATACTCAACACGT_1	30.6127	29.6828	T_NK
P1TLH_CTTAGGAGTAACGACG_1	56.1929	42.185	T_NK
P3TLH_TGAAAGATCGTGGGAA_1	6.31076	-19.9427	Hepatocytes
P1TLH_GACGTGCGTCCCTACT_1	-39.4794	38.4662	Central_venous_LSECs
P2TLH_CGTCTACCACAGATTC_1	45.6332	49.1757	T_NK
P3TLH_ACACCAACAGGCTCAC_1	3.19276	-7.58722	Hepatocytes
P4TLH_CGTGTAAAGGATCGCA_1	48.841	23.1951	T_NK
P3TLH_CTCTAATGTGCGATAG_1	18.3801	-4.08297	Hepatocytes
P5TLH_CCTTCCCCACAACTGT_1	63.3688	-2.32713	T_NK
P4TLH_AGCTTGAGTTGGTAAA_1	-74.4936	8.53839	Macrophage
P4TLH_CTTAACTTCGCTAGCG_1	72.0312	22.5739	T_NK
P1TLH_TCTGAGATCATGCAAC_1	-35.538	56.0189	Central_venous_LSECs
P3TLH_ATAGACCGTAGTACCT_1	18.2718	-26.0299	Hepatocytes
P2TLH_CTGCGGACAAGGTTCT_1	1.30117	20.7249	B_cells
P4TLH_GCGCCAAGTCGTTGTA_1	2.66946	66.2895	B_cells
P3TLH_CATATGGAGCTACCGC_1	19.3486	-39.9213	Hepatocytes
P3TLH_CAACTAGTCGCCTGTT_1	41.7038	-25.0132	Hepatocytes
P3TLH_TTTGTCACACGAGAGT_1	22.6958	-56.282	Hepatocytes
P5TLH_CCTAAAGAGCCGATTT_1	-31.6427	16.7011	Cholangiocytes
P3TLH_ATCACGACATTACCTT_1	-1.0209	-44.9148	Hepatocytes
P3TLH_GACGTTAGTAGAGTGC_1	-7.82343	-19.3233	Hepatocytes
P4TLH_TTCGGTCTCCACGACG_1	68.9607	25.4901	T_NK
P3TLH_ACGCAGCAGATTACCC_1	-20.3237	-21.9702	Hepatocytes
P5TLH_CTCGAAAGTTCAGCGC_1	9.04689	-69.1979	Hepatocytes
P1TLH_CTGATCCAGTCACGCC_1	-51.8733	-0.166625	Macrophage
P4TLH_TGAGCATCAAGAAGAG_1	-49.3742	-0.00211417	Macrophage
P5TLH_ACTATCTGTAGTGAAT_1	-51.4183	-15.3952	Macrophage
P4TLH_GGTGCGTAGATCCCAT_1	17.5524	50.2087	T_NK
P3TLH_GCTTGAACATCCTAGA_1	18.3661	-9.61837	Hepatocytes
P3TLH_CAAGTTGAGTCTCAAC_1	-14.9594	-21.909	Hepatocytes
P5TLH_TTAGGCATCACCATAG_1	-0.22836	65.2766	B_cells
P5TLH_AGGGAGTGTATTACCG_1	65.1884	-1.59916	T_NK
P1TLH_CGGACACAGATGTAAC_1	-40.9844	39.0545	Central_venous_LSECs
P4TLH_CGAGCACTCTCTGCTG_1	-67.8506	8.52754	Macrophage
P5TLH_GACTGCGCAGATCCAT_1	-32.5162	63.7391	Periportal_LSECs
P3TLH_TTCGGTCGTCATTAGC_1	11.5467	0.49953	Hepatocytes
P2TLH_ATCCGAAGTCGCGGTT_1	-52.5983	13.1774	Macrophage
P3TLH_AACCGCGCACGAAGCA_1	21.4488	-59.3657	Hepatocytes
P2TLH_GCCTCTAAGCTCCTCT_1	-26.5983	-66.1788	Hepatocytes
P4TLH_TTCTCCTAGCTGAAAT_1	-61.1669	8.72832	Macrophage
P3TLH_GAGCAGAAGTGCAAGC_1	-22.6092	-9.58202	Hepatocytes
P4TLH_CATATGGGTCGTGGCT_1	-40.0035	45.7904	Central_venous_LSECs
P3TLH_ATCATCTTCAGCGACC_1	-0.262342	-11.1633	Hepatocytes
P3TLH_TAGCCGGGTAAGTGTA_1	33.3271	-7.92492	Hepatocytes
P3TLH_CGAATGTCACAACTGT_1	-16.4479	-21.9692	Hepatocytes
P3TLH_ACGCCGACACGAAAGC_1	-4.69641	-20.887	Hepatocytes
P3TLH_GTGTTAGCACCGATAT_1	-26.2502	14.6786	Cholangiocytes
P5TLH_GCTCCTACATCGGAAG_1	9.04694	-68.7398	Hepatocytes
P3TLH_AACACGTGTTCAGTAC_1	11.4039	-27.198	Hepatocytes
P5TLH_TCAGCAATCGGTCCGA_1	31.9221	29.9283	T_NK
P5TLH_CATCGAACAAGTTCTG_1	70.3556	-6.59027	T_NK
P2TLH_ACATACGCAGACTCGC_1	-26.4304	55.694	Periportal_LSECs
P5TLH_ACTGATGAGGGCACTA_1	-63.8211	-4.49534	Macrophage
P3TLH_TGCGTGGAGACGCACA_1	-52.4168	11.1939	Macrophage
P3TLH_ACTTACTAGCGATGAC_1	-22.7019	67.1913	Periportal_LSECs
P3TLH_TGCGTGGTCATGGTCA_1	1.18661	-24.8243	Hepatocytes
P3TLH_CGGCTAGGTGACAAAT_1	29.7164	-11.1062	Hepatocytes
P5TLH_TGTATTCTCTCGTTTA_1	28.4824	29.2253	T_NK
P3TLH_CATCAAGTCGTTGACA_1	21.4845	-37.5875	Hepatocytes
P5TLH_TACTTGTCAGATTGCT_1	-51.0053	-17.1747	Macrophage
P4TLH_TTCTCAAAGGAATTAC_1	50.1353	23.353	T_NK
P2TLH_TTGACTTGTAAGGATT_1	0.770407	21.7084	B_cells
P3TLH_CAAGTTGAGTTTGCGT_1	41.4667	-17.1785	Hepatocytes
P5TLH_CCATTCGAGTCCCACG_1	66.017	-3.57178	T_NK
P5TLH_ATCATGGCATATGGTC_1	52.4551	13.8186	T_NK
P2TLH_TTTCCTCTCCGCAGTG_1	-33.6441	-51.1737	Hepatocytes
P4TLH_ACTGAGTTCAAACCGT_1	4.31863	67.4935	B_cells
P4TLH_ACTGTCCTCTTCAACT_1	-0.223722	-65.0712	Hepatocytes
P2TLH_GTAGTCAGTACGAAAT_1	-29.7111	21.5789	Cholangiocytes
P3TLH_ATCGAGTCACCCAGTG_1	28.8069	-59.0797	Hepatocytes
P3TLH_GACCTGGGTGGTCCGT_1	-8.93068	-36.6159	Hepatocytes
P5TLH_CTGAAACGTATTCTCT_1	67.5503	-4.06221	T_NK
P2TLH_CCTAGCTAGGGATACC_1	-4.48056	32.4759	B_cells
P2TLH_AGCTTGAAGCCACTAT_1	-36.9937	-62.7241	Hepatocytes
P3TLH_TTAGGACGTCTACCTC_1	23.4168	-16.7037	Hepatocytes
P4TLH_ATAAGAGTCAGCTGGC_1	39.9276	42.1747	T_NK
P1TLH_GTACTTTTCAGTCCCT_1	-51.1869	0.170152	Macrophage
P4TLH_CTACCCATCCCACTTG_1	3.74182	69.7439	B_cells
P2TLH_GTGAAGGAGCGTAGTG_1	1.432	25.1178	B_cells
P1TLH_AGAATAGCATCTCCCA_1	28.8552	65.9918	T_NK
P5TLH_AGCAGCCTCGCAGGCT_1	27.1467	38.0961	T_NK
P3TLH_GGGCATCCAAGACACG_1	1.79283	-37.9884	Hepatocytes
P4TLH_AAAGCAATCTACTATC_1	-75.0662	8.63659	Macrophage
P5TLH_ACCGTAAAGAGACTTA_1	37.4558	34.1578	T_NK
P3TLH_GTACGTAAGGAGTTTA_1	-25.72	16.4275	Cholangiocytes
P5TLH_CACAAACAGTATGACA_1	-52.1386	-14.6823	Macrophage
P5TLH_AGCGTATTCAAACCAC_1	32.0556	19.2015	T_NK
P4TLH_GCAAACTAGACTACAA_1	-17.2344	1.08629	Hepatocytes
P1TLH_CCCATACCAACACCCG_1	-64.6727	-23.0065	Macrophage
P3TLH_TTCTTAGTCTATCGCC_1	-20.6365	-22.5067	Hepatocytes
P2TLH_AACTCAGGTCACAAGG_1	-2.68435	37.9691	B_cells
P5TLH_AAGACCTGTCACTTCC_1	23.9415	23.7135	T_NK
P3TLH_GTACGTACATGGATGG_1	37.8075	-35.0838	Hepatocytes
P3TLH_GGACGTCAGTGTGAAT_1	-12.0419	-26.5791	Hepatocytes
P2TLH_GTCATTTCATTAGGCT_1	-39.8639	-60.7065	Hepatocytes
P3TLH_TATTACCAGGATTCGG_1	-10.4594	-31.3224	Hepatocytes
P3TLH_AGTAGTCAGACAAGCC_1	-18.2759	-23.6419	Hepatocytes
P4TLH_GTACTTTCACATGGGA_1	4.1827	66.4072	B_cells
P5TLH_TGGCCAGTCAGGATCT_1	-32.8418	58.9939	Periportal_LSECs
P5TLH_CGCGTTTCAGCTATTG_1	-48.1492	-18.9861	Macrophage
P1TLH_AAACCTGTCCTCATTA_1	-26.6013	19.664	Cholangiocytes
P1TLH_TTAGGACCAAGCCGCT_1	36.1761	43.0704	T_NK
P5TLH_GTCTTCGTCAGTTGAC_1	-48.8563	-15.4114	Macrophage
P1TLH_GAGTCCGAGTGAACGC_1	-49.5395	0.890114	Macrophage
P3TLH_GATCGCGTCACCGTAA_1	-7.4352	41.0706	B_cells
P3TLH_GCAGCCAGTGACCAAG_1	5.71675	-10.321	Hepatocytes
P1TLH_ACCTTTAGTCCGAATT_1	-51.4637	23.3171	Macrophage
P3TLH_TGTCCCATCATCGATG_1	31.6208	-22.8163	Hepatocytes
P5TLH_CCGTTCACAGTAAGAT_1	45.0173	10.1823	T_NK
P2TLH_GCAGTTAAGGATATAC_1	-30.4066	-59.2853	Hepatocytes
P2TLH_CTACATTTCCCACTTG_1	-44.5084	-52.799	Hepatocytes
P4TLH_GGGTTGCCAAAGAATC_1	3.39252	64.3997	B_cells
P5TLH_TTTGTCAGTTTAGGAA_1	-26.6687	63.2582	Periportal_LSECs
P3TLH_CGCTATCAGACTGTAA_1	19.777	-1.50403	Hepatocytes
P2TLH_TTGTAGGCAGCCTTGG_1	0.209693	29.7133	B_cells
P3TLH_GCCTCTACAAGCCATT_1	-12.2378	-33.1871	Hepatocytes
P5TLH_CAGCAGCGTGGCTCCA_1	24.3551	37.139	T_NK
P3TLH_TACACGAAGGAATCGC_1	11.0385	-45.0249	Hepatocytes
P5TLH_GTCACGGTCTGGCGAC_1	30.6603	19.0681	T_NK
P3TLH_CACAAACAGAAGGTTT_1	-44.8448	-15.8889	Macrophage
P5TLH_CGGAGCTAGTGTACGG_1	9.66474	-68.7659	Hepatocytes
P5TLH_GTGCATATCGAATGCT_1	47.4347	7.86364	T_NK
P1TLH_TCCACACAGAATGTGT_1	78.9612	10.4632	T_NK
P2TLH_CGGAGTCTCCGAGCCA_1	-20.7767	-67.2453	Hepatocytes
P3TLH_CGATCGGTCGGAGGTA_1	34.8581	-19.0767	Hepatocytes
P2TLH_AACTCAGTCCACTGGG_1	-5.51762	32.472	B_cells
P3TLH_ATTGGTGCACAAGTAA_1	-0.956439	-44.9932	Hepatocytes
P2TLH_CCAGCGACAGGGTATG_1	-19.1337	30.1761	B_cells
P4TLH_GGGCATCTCGCCAGCA_1	72.8698	30.8349	T_NK
P1TLH_CGACTTCGTCCTAGCG_1	-43.0414	45.1195	Central_venous_LSECs
P3TLH_AGGGTGACAGGACCCT_1	33.2167	-29.873	Hepatocytes
P2TLH_AGCGTCGTCAAACCAC_1	-10.8605	26.3553	B_cells
P5TLH_ATAGACCGTCTTCAAG_1	43.6151	14.0576	T_NK
P1TLH_GGGCACTAGTGAACGC_1	-51.9459	23.623	Macrophage
P2TLH_CAAGTTGCAGTCGATT_1	-26.1268	-71.1737	Hepatocytes
P4TLH_TCCACACCACTACAGT_1	56.6025	37.762	T_NK
P2TLH_CGATTGACACCTTGTC_1	-25.0453	-53.5593	Hepatocytes
P3TLH_GTGCAGCGTAGCGTGA_1	13.9369	-34.3928	Hepatocytes
P2TLH_CTGATAGTCCACGCAG_1	-40.1319	-59.4373	Hepatocytes
P3TLH_TCGTAGAAGTTTCCTT_1	25.9946	-5.59943	Hepatocytes
P2TLH_ACGATACTCTTAGAGC_1	-1.57248	22.8934	B_cells
P3TLH_TTGTAGGAGTGTCCAT_1	19.4564	2.55164	Hepatocytes
P3TLH_CTAATGGAGTGACATA_1	12.3252	-41.5611	Hepatocytes
P2TLH_ATGCGATCAAACCCAT_1	-45.1635	11.3385	Macrophage
P5TLH_CCATGTCCAGTATGCT_1	16.19	25.1067	T_NK
P4TLH_AAACGGGAGGCGTACA_1	33.1746	47.5769	T_NK
P1TLH_ACGTCAAAGCGCTCCA_1	51.0227	30.2752	T_NK
P5TLH_CCATGTCAGGGTCTCC_1	32.8	16.303	T_NK
P5TLH_CGTCCATCAATCTACG_1	55.2161	8.58887	T_NK
P4TLH_CTCGAAACATTCCTCG_1	72.4347	24.3672	T_NK
P3TLH_CAGTCCTGTGGTGTAG_1	35.2742	-18.0855	Hepatocytes
P3TLH_CATGGCGTCTGCAGTA_1	-54.8812	-2.85697	Macrophage
P3TLH_CGAACATTCGGAGGTA_1	3.52062	-39.1303	Hepatocytes
P3TLH_CCCAGTTAGCTGCAAG_1	4.0474	-31.1063	Hepatocytes
P4TLH_GACAGAGAGGCTCATT_1	55.5381	18.3326	T_NK
P3TLH_CAACCTCCAAGGACAC_1	13.0843	-34.3272	Hepatocytes
P3TLH_GCTGCAGAGCTAGTCT_1	-22.5962	65.1157	Periportal_LSECs
P1TLH_CAACCAAAGGATTCGG_1	48.2967	29.1274	T_NK
P3TLH_TCCACACGTCTAGAGG_1	36.3605	-8.82644	Hepatocytes
P1TLH_ATGCGATTCGTTGCCT_1	-4.95113	-83.4086	Hepatocytes
P3TLH_CAAGAAATCTACCTGC_1	30.4028	-55.4209	Hepatocytes
P2TLH_CTAGAGTTCTCCCTGA_1	-38.1164	-60.8266	Hepatocytes
P2TLH_TTCGAAGAGGGTCTCC_1	-38.6608	-58.6932	Hepatocytes
P4TLH_CACACAACATCGATGT_1	-59.3503	11.4166	Macrophage
P3TLH_CAGATCAGTGCGCTTG_1	28.0578	-12.5099	Hepatocytes
P3TLH_TAGGCATGTACCAGTT_1	32.4501	-24.2867	Hepatocytes
P5TLH_CATCAAGAGCGTAATA_1	-30.1505	56.143	Periportal_LSECs
P2TLH_TGTCCCATCGCCAAAT_1	-47.1983	-56.1216	Hepatocytes
P4TLH_CAGCAGCAGACCCACC_1	-59.4354	-15.095	Macrophage
P5TLH_CTAGAGTAGCTCTCGG_1	26.2292	34.3419	T_NK
P3TLH_CCACTACCATGACATC_1	3.76823	-9.01948	Hepatocytes
P3TLH_CCTTACGGTGACGCCT_1	37.8773	-9.5198	Hepatocytes
P5TLH_TTGTAGGAGCCGTCGT_1	-33.1858	63.9932	Periportal_LSECs
P3TLH_GATCTAGGTCAGATAA_1	4.07386	-36.6756	Hepatocytes
P4TLH_GCCTCTACAAACTGTC_1	-73.657	10.7199	Macrophage
P3TLH_CTCTAATAGCGTGTCC_1	-24.4461	57.7575	Periportal_LSECs
P3TLH_TCAGGTATCGCGTTTC_1	-14.3738	-6.42249	Hepatocytes
P3TLH_GCGCGATCATGTTGAC_1	35.4025	-42.23	Hepatocytes
P5TLH_ATGCGATAGGAGCGAG_1	20.2401	30.5927	T_NK
P5TLH_AAGGCAGAGTGGCACA_1	-58.48	2.69108	Macrophage
P4TLH_TTGACTTCACGGTGTC_1	-12.1243	38.9323	B_cells
P1TLH_GACTAACCATGCATGT_1	43.831	60.6481	T_NK
P5TLH_GGGCACTCACTACAGT_1	46.9441	8.73609	T_NK
P3TLH_CACAGGCGTCATTAGC_1	10.6815	-48.8956	Hepatocytes
P1TLH_TACGGATAGATGCCAG_1	-1.87226	-81.0614	Hepatocytes
P4TLH_CACCTTGTCGGACAAG_1	17.1425	45.9797	T_NK
P5TLH_TCTCATACAAAGAATC_1	2.83764	70.9716	B_cells
P3TLH_TCGTAGAAGACAGAGA_1	-67.0473	-4.26219	Macrophage
P1TLH_CGATCGGGTTCGTTGA_1	38.0384	59.6306	T_NK
P1TLH_CGCCAAGCATGGTTGT_1	-45.4123	41.4256	Central_venous_LSECs
P3TLH_CTCGTCAGTCCGAATT_1	30.3651	-12.363	Hepatocytes
P3TLH_ACGTCAAAGGGCTCTC_1	27.7763	-26.7173	Hepatocytes
P3TLH_TGCACCTCACTGAAGG_1	-5.42339	-19.9642	Hepatocytes
P3TLH_GTGCATAGTTTGCATG_1	25.3449	-7.34251	Hepatocytes
P3TLH_AGATTGCTCGTCTGAA_1	-5.22472	-40.4349	Hepatocytes
P3TLH_TCATTTGAGACCTAGG_1	-24.5664	-20.8636	Hepatocytes
P4TLH_TGACAACAGGCCCGTT_1	28.2191	49.5888	T_NK
P5TLH_TATGCCCTCACTCTTA_1	28.6543	25.5213	T_NK
P5TLH_TGCACCTTCCTAAGTG_1	-56.2793	-0.508842	Macrophage
P2TLH_GGATTACTCATAAAGG_1	-9.0384	24.2824	B_cells
P5TLH_TAAACCGAGTGTACGG_1	67.4392	0.0920398	T_NK
P5TLH_TATGCCCCATCCTAGA_1	28.3594	22.4001	T_NK
P1TLH_ACCTTTACAGCATGAG_1	36.9279	59.1689	T_NK
P5TLH_GGACATTGTCCGAACC_1	66.9444	-7.69852	T_NK
P2TLH_TTCCCAGTCCAGTAGT_1	-5.88331	31.8906	B_cells
P1TLH_CGCCAAGCACTGCCAG_1	56.1267	42.1591	T_NK
P2TLH_ATCGAGTAGTACGCCC_1	-4.435	26.8043	B_cells
P3TLH_TCGTACCGTTCGGCAC_1	33.3289	-31.5307	Hepatocytes
P3TLH_AGGGTGACAGACACTT_1	-1.76447	-45.3642	Hepatocytes
P3TLH_GTGCTTCCAACGATGG_1	-21.5619	-19.1737	Hepatocytes
P3TLH_CTTCTCTCACAACGTT_1	-2.1105	-19.6022	Hepatocytes
P2TLH_ATTCTACTCGTATCAG_1	-4.96776	25.6397	B_cells
P3TLH_CGTCTACCACGGTGTC_1	19.2404	-13.6987	Hepatocytes
P3TLH_CCGGTAGGTTCGTTGA_1	10.8141	-31.4631	Hepatocytes
P4TLH_TGGACGCGTATAGTAG_1	30.865	51.09	T_NK
P5TLH_TGAAAGATCAAGCCTA_1	21.6094	37.4723	T_NK
P5TLH_ATGGGAGGTACGACCC_1	-27.2218	62.1581	Periportal_LSECs
P2TLH_GATGCTAGTCATTAGC_1	-54.927	14.8095	Macrophage
P3TLH_AGCGTATTCTGGAGCC_1	-13.2786	-21.1614	Hepatocytes
P2TLH_TACAGTGAGGCGCTCT_1	-29.746	-54.0271	Hepatocytes
P2TLH_TCTTTCCCACTTGGAT_1	-43.0448	-56.7685	Hepatocytes
P4TLH_CCGGTAGTCCGGGTGT_1	-62.1222	-4.8038	Macrophage
P5TLH_ATCACGATCGGCATCG_1	21.8188	38.6929	T_NK
P5TLH_CAGCAGCAGTGTGGCA_1	0.520737	67.7188	B_cells
P1TLH_TCTTTCCCATGTTCCC_1	1.50703	-77.9615	Hepatocytes
P4TLH_GCGCAGTAGGGCATGT_1	-62.4784	10.9417	Macrophage
P2TLH_TACTCATGTAGCTCCG_1	-43.1568	7.46153	Macrophage
P4TLH_GTGCAGCCAACTGCGC_1	-18.2026	31.9521	B_cells
P5TLH_ACGATGTTCAAGGTAA_1	61.4778	5.85956	T_NK
P3TLH_CTACGTCAGCCAGTTT_1	31.3777	-10.2951	Hepatocytes
P5TLH_GGACGTCTCGATCCCT_1	27.8049	25.8498	T_NK
P3TLH_GCATGATCACTGCCAG_1	-66.7148	-3.38575	Macrophage
P4TLH_CCTACACTCACCATAG_1	-60.159	10.0855	Macrophage
P1TLH_CCTTACGCACTACAGT_1	-0.778763	-79.5752	Hepatocytes
P3TLH_CAGCTGGGTACAGTGG_1	38.1238	-9.16657	Hepatocytes
P3TLH_CCGTACTAGACTGTAA_1	22.379	-50.7333	Hepatocytes
P5TLH_GACGTTAAGTCGATAA_1	8.87507	-69.3522	Hepatocytes
P3TLH_CGACCTTGTACATCCA_1	-6.80959	-12.657	Hepatocytes
P4TLH_CACATTTCACTGCCAG_1	19.4669	48.8567	T_NK
P2TLH_CACAGGCAGCCCAACC_1	-13.1262	29.0582	B_cells
P3TLH_TGATTTCTCTGCTGTC_1	25.5071	-12.7694	Hepatocytes
P4TLH_GATGAGGTCAGCACAT_1	24.314	48.9398	T_NK
P1TLH_CAACCTCCAGCTTCGG_1	-46.5231	41.814	Central_venous_LSECs
P5TLH_CCTAAAGAGTGCGTGA_1	42.3068	9.89214	T_NK
P2TLH_CTCGAAACAGACACTT_1	-40.578	-47.9628	Hepatocytes
P3TLH_GCATACAAGGACGAAA_1	33.5796	-9.89387	Hepatocytes
P3TLH_CCTACCACAAGCGAGT_1	35.29	-12.7085	Hepatocytes
P4TLH_CCTTACGGTCACAAGG_1	-63.0353	-8.77941	Macrophage
P3TLH_GTCTCGTGTATATGGA_1	-18.9205	-19.4939	Hepatocytes
P3TLH_CAGCCGAAGTTTCCTT_1	-1.19498	-43.6452	Hepatocytes
P3TLH_CTGCCTACAAAGCAAT_1	38.0063	-9.61653	Hepatocytes
P5TLH_CTGAAACTCTGGGCCA_1	8.25995	-71.4232	Hepatocytes
P4TLH_TACAGTGGTGTATGGG_1	-57.8459	-16.0956	Macrophage
P3TLH_CGCCAAGGTAGCAAAT_1	-8.61775	-22.2526	Hepatocytes
P1TLH_CCGTACTTCCATTCTA_1	78.9388	14.9761	T_NK
P2TLH_GATCGATCAGCCTATA_1	-66.8864	18.9517	Macrophage
P3TLH_TCAACGACAGTAAGAT_1	40.3747	-25.543	Hepatocytes
P5TLH_GACGCGTTCTTGACGA_1	63.3995	-2.47676	T_NK
P5TLH_CGGAGTCAGGCATTGG_1	68.5116	-0.471238	T_NK
P3TLH_CGGAGCTGTTATCACG_1	21.5177	-0.616109	Hepatocytes
P5TLH_AACACGTAGGCTAGAC_1	24.3493	32.0263	T_NK
P3TLH_GCTGGGTGTCCGACGT_1	22.6594	0.54211	Hepatocytes
P5TLH_GGGACCTTCAGAGGTG_1	-71.6093	7.44999	Macrophage
P2TLH_TTGGCAACAGGTGCCT_1	-53.1321	12.6012	Macrophage
P1TLH_TGCGTGGCACGCCAGT_1	-41.8863	41.1886	Central_venous_LSECs
P4TLH_TTCTCAAGTACCGTAT_1	20.2571	52.6571	T_NK
P4TLH_GAATGAATCCTTGCCA_1	-27.468	71.6014	Periportal_LSECs
P2TLH_TTTCCTCGTACGACCC_1	-30.0078	-57.8571	Hepatocytes
P3TLH_TGCGTGGTCTAACGGT_1	15.4104	-26.7934	Hepatocytes
P1TLH_CCCATACTCTGATTCT_1	34.931	64.8404	T_NK
P3TLH_CCTATTATCGTACGGC_1	27.2194	-43.7899	Hepatocytes
P4TLH_CAGAATCGTGATAAAC_1	31.3826	46.2239	T_NK
P3TLH_CAAGTTGGTAGGGACT_1	28.7882	-35.6528	Hepatocytes
P4TLH_GTGTTAGAGGAGTTGC_1	56.2744	25.9953	T_NK
P1TLH_GAGTCCGCAGGTTTCA_1	43.9989	61.6142	T_NK
P3TLH_GAAATGAGTGGCAAAC_1	7.61714	-7.19208	Hepatocytes
P1TLH_ATTGGTGGTTGGACCC_1	36.7756	60.9929	T_NK
P2TLH_AACTCTTGTGTTTGTG_1	-11.8435	23.6023	B_cells
P3TLH_CGGACACCAGCTGCAC_1	39.4011	-14.4678	Hepatocytes
P3TLH_GGACATTTCCATTCTA_1	-3.39697	-13.1777	Hepatocytes
P2TLH_ATCCGAAAGTGTACCT_1	-50.3731	-55.7194	Hepatocytes
P3TLH_ACACCAATCGGTGTTA_1	16.724	-41.7397	Hepatocytes
P3TLH_GTGTTAGCAATCTGCA_1	0.576064	-28.8026	Hepatocytes
P5TLH_CTGTGCTCACATCTTT_1	30.588	35.445	T_NK
P1TLH_TATCTCAAGACTAAGT_1	0.648791	-78.4679	Hepatocytes
P2TLH_CGGTTAAGTCGAACAG_1	-35.2249	-61.9591	Hepatocytes
P3TLH_TGGCTGGCAGAAGCAC_1	22.4797	-31.9721	Hepatocytes
P3TLH_ACTTGTTCACCACGTG_1	24.0145	-27.4637	Hepatocytes
P3TLH_GCAGTTAAGCGAGAAA_1	2.6281	-26.0839	Hepatocytes
P3TLH_GATCGTAAGCGCCTTG_1	-18.2011	-22.0407	Hepatocytes
P2TLH_GTTCATTGTTCGGCAC_1	-25.7165	-70.6055	Hepatocytes
P2TLH_AGATCTGTCACTTCAT_1	-27.0378	66.6627	Periportal_LSECs
P3TLH_GTATTCTGTCGCATCG_1	5.44245	-42.8371	Hepatocytes
P2TLH_TAAGAGATCGTGACAT_1	-4.71267	23.4118	B_cells
P1TLH_CGTGAGCTCAAACGGG_1	-50.4092	20.4188	Macrophage
P3TLH_TGCTGCTTCTAAGCCA_1	11.9432	-45.743	Hepatocytes
P3TLH_CTGATAGTCTGTCCGT_1	-5.27896	-20.1813	Hepatocytes
P3TLH_TGAAAGACACATGACT_1	33.2657	-50.9667	Hepatocytes
P3TLH_GCGGGTTTCCCATTAT_1	30.29	-43.3642	Hepatocytes
P5TLH_TTAGTTCCATAGGATA_1	38.3628	31.9451	T_NK
P2TLH_ACGATGTAGTACGCGA_1	-28.0401	-52.6425	Hepatocytes
P5TLH_GGGACCTGTTCAGACT_1	30.1729	26.6376	T_NK
P3TLH_CCGTGGAAGGTTCCTA_1	-21.8425	-21.8869	Hepatocytes
P4TLH_GACTGCGGTAAGGGCT_1	-11.0635	38.0568	B_cells
P5TLH_CTGCTGTTCCTCGCAT_1	-56.0334	-2.22838	Macrophage
P3TLH_CTCGGAGAGCGCTTAT_1	33.1782	-20.955	Hepatocytes
P3TLH_GAACATCGTCCTAGCG_1	-18.3754	-5.60115	Hepatocytes
P5TLH_TTCTACAAGGCAAAGA_1	-56.2543	16.8061	Macrophage
P2TLH_GCGGGTTTCCGTCATC_1	0.621906	21.1165	B_cells
P4TLH_GACAGAGAGACGCACA_1	55.327	18.1281	T_NK
P3TLH_GAAGCAGCATGTCTCC_1	21.7988	-49.6691	Hepatocytes
P3TLH_AGCTCTCGTTCTCATT_1	-11.26	-34.615	Hepatocytes
P1TLH_GTTCGGGGTAAATGAC_1	78.9013	14.2268	T_NK
P3TLH_ATGAGGGCATTTGCCC_1	31.0975	-47.909	Hepatocytes
P3TLH_CGGGTCATCAACGAAA_1	17.6824	-60.3841	Hepatocytes
P2TLH_CTCGGGATCACTCCTG_1	-28.2581	-51.325	Hepatocytes
P3TLH_CGTCTACCATATACCG_1	-1.70409	-13.1281	Hepatocytes
P3TLH_GTATCTTAGTAGCGGT_1	1.6289	-47.8195	Hepatocytes
P1TLH_CGCCAAGGTCCAGTAT_1	45.7148	63.5761	T_NK
P4TLH_GGACAGAGTCGCTTCT_1	18.4068	51.0929	T_NK
P2TLH_CGTCACTCAGTATAAG_1	-3.09324	22.4078	B_cells
P2TLH_TGTGGTAAGAGGACGG_1	-35.7902	-64.9121	Hepatocytes
P3TLH_CCCATACGTTGTTTGG_1	32.7332	-51.9089	Hepatocytes
P1TLH_CCCATACCACTTGGAT_1	-43.1196	7.71443	Macrophage
P4TLH_GTAACGTCAAGAAAGG_1	-60.1395	-2.04219	Macrophage
P3TLH_CTAGTGACATTACCTT_1	16.7543	-48.716	Hepatocytes
P3TLH_CCTACCAAGTGTACTC_1	15.3782	-20.4985	Hepatocytes
P4TLH_CAGAGAGAGCGTGAAC_1	22.3315	45.8685	T_NK
P4TLH_GAATGAACAAGGGTCA_1	-50.3533	6.77257	Macrophage
P4TLH_CATCGAATCTTGTATC_1	19.9008	51.9791	T_NK
P3TLH_CAGCTGGAGAGTTGGC_1	39.3153	-9.04203	Hepatocytes
P3TLH_TCAGGTACATGGGACA_1	24.9859	-16.5262	Hepatocytes
P3TLH_TGGTTAGCAAGGCTCC_1	15.393	-25.8727	Hepatocytes
P5TLH_CTCGAAACATGCAACT_1	26.597	33.1387	T_NK
P4TLH_AACTGGTAGCCACGCT_1	-23.3181	62.3654	Periportal_LSECs
P2TLH_ATGGGAGCAGGACCCT_1	-4.25682	25.2877	B_cells
P5TLH_CTCGTCAAGTTAACGA_1	-29.6638	59.0189	Periportal_LSECs
P3TLH_TCGGGACTCAACACAC_1	33.4536	-2.42823	Hepatocytes
P1TLH_TCTCTAAAGACCGGAT_1	-52.2944	24.6252	Macrophage
P5TLH_CCTTACGAGCAGACTG_1	24.1471	25.6039	T_NK
P3TLH_GCTGCGAAGTCGATAA_1	1.34296	-24.9108	Hepatocytes
P3TLH_GACTGCGAGACAGGCT_1	30.3424	-18.687	Hepatocytes
P3TLH_ATCATGGCAGTACACT_1	24.0317	-40.7885	Hepatocytes
P2TLH_CATTCGCCAAGTAGTA_1	-17.9366	-57.2386	Periportal_LSECs
P2TLH_CAAGGCCCACCGCTAG_1	-11.741	26.5116	B_cells
P3TLH_AGCGGTCCATTGGGCC_1	30.62	-58.266	Hepatocytes
P3TLH_GTCACAAAGGGTGTGT_1	35.6225	-9.98269	Hepatocytes
P5TLH_CGATGTATCACTTATC_1	11.3165	-71.0992	Hepatocytes
P1TLH_GCTTGAACAAAGTGCG_1	-1.83315	-80.251	Hepatocytes
P3TLH_CGAACATAGTCCTCCT_1	-13.1566	-24.8557	Hepatocytes
P4TLH_ATCGAGTGTAGAAGGA_1	39.3796	40.7249	T_NK
P3TLH_CGTCAGGCACACCGCA_1	-4.44905	-12.4504	Hepatocytes
P3TLH_GTATTCTTCAGGCGAA_1	28.3131	-21.867	Hepatocytes
P1TLH_GACCTGGGTAGTAGTA_1	-60.5572	-23.3682	Macrophage
P3TLH_CCACGGATCGTCCGTT_1	-7.05178	-16.099	Hepatocytes
P4TLH_TTTCCTCGTCTTGTCC_1	-54.1046	20.7502	Macrophage
P4TLH_AAACGGGAGATATGGT_1	74.6153	23.5358	T_NK
P3TLH_CATCCACAGATACACA_1	-5.60756	-29.8662	Hepatocytes
P4TLH_ATTATCCCATTAACCG_1	55.6195	18.8042	T_NK
P3TLH_CTCGTCAGTCTAACGT_1	-76.6385	-4.8355	Macrophage
P5TLH_CGTCCATTCCGCATCT_1	-52.891	-11.012	Macrophage
P4TLH_TCTATTGAGGTGCACA_1	-76.0824	8.0572	Macrophage
P1TLH_AAGCCGCAGGGCACTA_1	-47.2624	41.1135	Central_venous_LSECs
P5TLH_AAAGCAAGTGTCAATC_1	-34.4221	62.2277	Periportal_LSECs
P5TLH_CGAATGTCAAATCCGT_1	65.9815	-7.06571	T_NK
P4TLH_CTGATAGTCCTAAGTG_1	-14.3409	25.4486	B_cells
P3TLH_CTCAGAACATGAGCGA_1	33.5997	-29.1339	Hepatocytes
P2TLH_TACTTACTCAATCTCT_1	-29.7231	22.9398	Periportal_LSECs
P4TLH_GGCTGGTAGAGGGATA_1	17.7264	50.1336	T_NK
P1TLH_TATGCCCTCCAAACTG_1	-48.7935	0.979543	Macrophage
P2TLH_CACAGGCAGTTTCCTT_1	-26.2542	-68.4008	Hepatocytes
P2TLH_GGACGTCTCCCGGATG_1	-34.4884	-58.0288	Hepatocytes
P3TLH_CAGTCCTTCTCCAGGG_1	-45.6112	8.13188	Macrophage
P3TLH_TTTATGCTCAACTCTT_1	1.05567	-34.8608	Hepatocytes
P1TLH_TTGACTTTCTCAACTT_1	43.1861	58.8505	T_NK
P2TLH_AAGGAGCTCCGCAAGC_1	-10.6763	28.1481	B_cells
P2TLH_TGTATTCAGTACGATA_1	-1.92298	27.9602	B_cells
P5TLH_CGTTGGGTCGGAAACG_1	64.8887	2.79244	T_NK
P3TLH_AAGGAGCCAATCTACG_1	23.0126	-59.3146	Hepatocytes
P5TLH_CGGACTGCACACCGAC_1	33.4022	35.7875	T_NK
P3TLH_TGGACGCGTCTAAACC_1	-67.8218	-3.91766	Macrophage
P1TLH_TACCTATGTTGGTGGA_1	-41.8409	43.1172	Central_venous_LSECs
P4TLH_CTCATTAGTTGTGGAG_1	72.0064	27.3616	T_NK
P3TLH_ATCTGCCGTAGAGCTG_1	23.4801	-12.2876	Hepatocytes
P4TLH_TGACTTTAGGATGTAT_1	55.7538	26.5808	T_NK
P4TLH_CGATCGGAGATGCGAC_1	5.75351	72.9391	T_NK
P5TLH_TTGGCAAGTGTAACGG_1	-50.0795	-17.1109	Macrophage
P2TLH_GTGCTTCGTACCGGCT_1	-42.2912	-58.45	Hepatocytes
P1TLH_CTGATAGCAATGACCT_1	-55.0375	22.5184	Macrophage
P5TLH_GATCAGTGTAAAGGAG_1	10.0825	-71.6421	Hepatocytes
P3TLH_CTACGTCGTGTGGTTT_1	37.513	-53.0251	Hepatocytes
P4TLH_CGTTCTGAGATCTGCT_1	-62.468	-28.1059	Macrophage
P3TLH_AGAGCTTGTGACGCCT_1	7.59053	-31.8723	Hepatocytes
P3TLH_CGGACGTGTTCCATGA_1	11.9735	-50.1096	Hepatocytes
P1TLH_TGACTAGGTATAGGTA_1	-47.5695	2.41966	Macrophage
P1TLH_GAACCTACAAAGGAAG_1	-42.502	7.18058	Macrophage
P5TLH_GACGCGTTCCCGACTT_1	-31.7182	17.3785	Cholangiocytes
P1TLH_TTGACTTGTCAGAGGT_1	-51.5723	22.4763	Macrophage
P4TLH_CTCTACGGTACCGTTA_1	19.6964	52.609	T_NK
P4TLH_GACACGCAGATGCCTT_1	72.8175	29.6105	T_NK
P3TLH_CCTTCCCCAGACGCAA_1	-15.3039	-7.92067	Hepatocytes
P3TLH_GCGCCAAGTCTCGTTC_1	5.2097	-25.6583	Hepatocytes
P4TLH_CTCATTATCTGTGCAA_1	-28.9187	17.0498	Cholangiocytes
P3TLH_CTACATTAGCGTGAAC_1	-14.7395	-2.8745	Hepatocytes
P1TLH_AGAGCGAAGCTGAACG_1	-7.21595	-82.9777	Hepatocytes
P2TLH_CTACACCGTCTCCATC_1	-13.9547	27.1875	B_cells
P1TLH_TATGCCCTCGTAGGAG_1	38.0114	68.9665	T_NK
P5TLH_CACACAAGTGTATGGG_1	20.4484	23.3045	T_NK
P1TLH_GCGCAACTCAAGGCTT_1	-17.6353	-57.1867	Central_venous_LSECs
P4TLH_CAGCGACGTAGGACAC_1	74.0387	30.6524	T_NK
P4TLH_TGCGTGGTCTCGCTTG_1	-24.2852	65.788	Periportal_LSECs
P3TLH_CCCATACCACGAAAGC_1	33.8752	-24.6504	Hepatocytes
P4TLH_TGAGCATCATCGATGT_1	35.2238	44.1625	T_NK
P5TLH_CTGTTTAAGACTAGAT_1	24.4396	33.7715	T_NK
P3TLH_TACGGATAGTGATCGG_1	-20.6622	-25.1125	Hepatocytes
P5TLH_GTTACAGGTTATGTGC_1	68.4831	-8.07914	T_NK
P5TLH_CAAGTTGTCAAACGGG_1	52.3656	11.2829	T_NK
P1TLH_CAAGTTGTCCTGCTTG_1	-61.9145	-27.6682	Macrophage
P2TLH_CCTTCGAGTGTTAAGA_1	-26.539	-64.1381	Hepatocytes
P3TLH_TTAGTTCGTAGCGTCC_1	35.5967	-16.4961	Hepatocytes
P2TLH_TGAGGGAGTAAGGGCT_1	-25.9924	-50.6465	Hepatocytes
P3TLH_ACGAGGACATGTCTCC_1	-19.6911	-21.4202	Hepatocytes
P4TLH_TTAACTCGTCCGAGTC_1	64.6992	22.391	T_NK
P2TLH_GCGCAGTCAATAGCGG_1	-1.08678	38.9429	B_cells
P3TLH_AGAGCGATCGTGGTCG_1	32.729	-15.0552	Hepatocytes
P3TLH_CAACCTCTCAACGCTA_1	-20.4404	-19.6347	Hepatocytes
P3TLH_AGCTCTCTCAGGATCT_1	-4.63751	-38.9145	Hepatocytes
P3TLH_ATCTGCCGTTCCACTC_1	19.5888	-11.4388	Hepatocytes
P4TLH_GACAGAGAGATCACGG_1	68.3608	30.2068	T_NK
P5TLH_CGGACTGCACGCTTTC_1	-52.3508	-20.5409	Macrophage
P1TLH_AACCGCGTCCACGCAG_1	33.6827	62.0795	T_NK
P5TLH_CCCATACGTTGTGGCC_1	19.8709	20.4557	T_NK
P3TLH_CACAGGCAGACTGTAA_1	36.1944	-18.0762	Hepatocytes
P3TLH_CTGCTGTAGGTACTCT_1	4.70594	-40.0516	Hepatocytes
P3TLH_AACTCTTCATCTCGCT_1	-26.9496	17.9726	Cholangiocytes
P5TLH_GGCGACTTCAGCTCGG_1	9.76555	-68.4432	Hepatocytes
P3TLH_AACTCCCTCACATAGC_1	22.1028	-4.60382	Hepatocytes
P1TLH_TGAGGGATCAAACCAC_1	-47.204	46.2884	Central_venous_LSECs
P4TLH_CTACGTCGTCGTTGTA_1	68.1463	16.2038	T_NK
P1TLH_ATAACGCAGAGAGCTC_1	37.5122	66.2296	T_NK
P2TLH_CAGCGACTCTCTAGGA_1	-39.7847	-58.6369	Hepatocytes
P3TLH_TCAATCTCATTCCTCG_1	5.35878	-42.7079	Hepatocytes
P3TLH_AAGTCTGAGTATGACA_1	27.8108	-7.11695	Hepatocytes
P1TLH_CTAATGGGTATCTGCA_1	39.4788	63.8023	T_NK
P4TLH_AGCCTAAGTACTTAGC_1	-63.8061	9.80337	Macrophage
P1TLH_CTCGTACAGGAGTCTG_1	-48.2026	47.8144	Central_venous_LSECs
P1TLH_AAGGTTCAGTGGACGT_1	-63.8945	-23.6589	Macrophage
P5TLH_TGCTACCTCCGTCATC_1	-56.4055	16.8115	Macrophage
P4TLH_CATCGAACACCACGTG_1	15.0621	51.7391	T_NK
P3TLH_TCGCGTTCAGTACACT_1	30.0862	-44.7326	Hepatocytes
P4TLH_GTGTGCGCACAAGTAA_1	56.2646	21.4928	T_NK
P4TLH_ATTGGACCATCAGTAC_1	73.4619	25.7609	T_NK
P2TLH_TCAGCAAGTCTAGGTT_1	-25.7117	-53.3092	Hepatocytes
P4TLH_ACGCAGCGTAAAGTCA_1	-75.3354	7.8239	Macrophage
P3TLH_ACGAGGACACCGCTAG_1	26.9164	-50.4169	Hepatocytes
P2TLH_ACCGTAAGTTGAGTTC_1	-41.2603	-60.6753	Hepatocytes
P3TLH_TAAGAGATCGAATGGG_1	16.5572	-36.7476	Hepatocytes
P4TLH_ATTCTACAGTCGATAA_1	-16.3758	1.43116	Hepatocytes
P1TLH_TTGCCGTGTGTGAAAT_1	38.0987	65.6233	T_NK
P3TLH_AGGCCACAGCAGACTG_1	-15.9229	-26.0081	Hepatocytes
P3TLH_GTCGTAAAGTGTACCT_1	-7.7874	-34.3123	Hepatocytes
P3TLH_CGTAGGCGTCTCTCGT_1	-46.4007	8.75025	Macrophage
P2TLH_AACACGTTCATCGATG_1	-26.058	-53.0558	Hepatocytes
P4TLH_TGTTCCGGTGGCGAAT_1	-58.8282	-14.6393	Macrophage
P4TLH_CGTAGGCTCGGCATCG_1	68.4599	26.9997	T_NK
P3TLH_CAGCCGATCGCCTGTT_1	3.72762	-45.6902	Hepatocytes
P2TLH_AGTGGGAGTAAATGTG_1	-26.2356	-62.8242	Hepatocytes
P3TLH_GGGATGACATATACGC_1	35.0913	-8.71779	Hepatocytes
P2TLH_TATCTCATCTCAAACG_1	-46.916	-46.284	Hepatocytes
P5TLH_AAGTCTGGTGTTCTTT_1	17.9344	27.5506	T_NK
P1TLH_CCTATTAAGTGAAGAG_1	-5.28654	-84.8417	Hepatocytes
P4TLH_TCGTAGACACTAGTAC_1	34.0674	46.702	T_NK
P1TLH_TATGCCCTCTAACTTC_1	-41.6592	40.788	Central_venous_LSECs
P4TLH_GGAACTTGTTCCATGA_1	-62.158	9.92662	Macrophage
P4TLH_TTGAACGAGTTCGCAT_1	68.4258	20.6245	T_NK
P4TLH_TCTTTCCAGTGACATA_1	20.2895	44.721	T_NK
P2TLH_TTTGTCACACATGTGT_1	-34.3495	-60.51	Hepatocytes
P3TLH_GTCACAACAATCTACG_1	13.0752	-49.9662	Hepatocytes
P3TLH_CATATTCCACGAGAGT_1	-24.7274	-20.8293	Hepatocytes
P4TLH_CCTAAAGGTCCCGACA_1	56.8158	18.867	T_NK
P2TLH_TGACTAGAGAACAATC_1	-21.1319	-67.598	Hepatocytes
P1TLH_GACTAACCAAGCGATG_1	-38.5512	43.2336	Central_venous_LSECs
P4TLH_CAGAGAGAGCAGGTCA_1	71.2246	27.8136	T_NK
P5TLH_GGGCATCCATTACCTT_1	23.9782	26.263	T_NK
P4TLH_TCGGGACAGGCGTACA_1	72.9505	20.1563	T_NK
P2TLH_GAATAAGCACTTAAGC_1	-67.0679	15.9309	Macrophage
P4TLH_ATTGGTGCACCATCCT_1	57.4874	22.5201	T_NK
P2TLH_TGAGCATTCGGTCTAA_1	-45.8365	-50.173	Hepatocytes
P5TLH_TACGGGCAGATCACGG_1	41.8146	13.9138	T_NK
P5TLH_TGCTACCGTAGGCTGA_1	4.91369	72.7264	Periportal_LSECs
P5TLH_CTTTGCGGTTACGTCA_1	28.2504	36.2301	T_NK
P1TLH_TTGAACGAGGACTGGT_1	4.40675	69.5408	B_cells
P3TLH_TGGCCAGAGGAGTTTA_1	4.20251	-31.6458	Hepatocytes
P3TLH_CTGAAACCAAGGCTCC_1	32.3514	-55.9386	Hepatocytes
P1TLH_TACCTATAGGACAGCT_1	-43.1253	3.72296	Macrophage
P1TLH_TAGAGCTTCGTAGGAG_1	-59.6701	-23.0499	Macrophage
P3TLH_CTAGCCTCAATTCCTT_1	6.77752	-23.1334	Hepatocytes
P3TLH_ACCCACTGTGGGTATG_1	29.1561	-0.752437	Hepatocytes
P3TLH_TGCGCAGGTTCGCGAC_1	14.533	-1.58916	Hepatocytes
P4TLH_CACCACTTCAAAGTAG_1	-62.2033	11.1011	Macrophage
P5TLH_CCTCAGTGTCCGCTGA_1	-50.341	-14.9603	Macrophage
P4TLH_AGGTCCGTCGATGAGG_1	29.8138	44.8437	T_NK
P2TLH_CAGCGACCATAGGATA_1	-44.9834	-51.9804	Hepatocytes
P2TLH_CTCGGGACATTGCGGC_1	-27.3512	-51.4987	Hepatocytes
P5TLH_TCCCGATTCTACTATC_1	33.4416	32.4853	T_NK
P3TLH_CAGCGACCAGCCTTTC_1	10.7289	-33.0674	Hepatocytes
P1TLH_TCGTACCTCACGCATA_1	49.6774	29.0183	T_NK
P3TLH_CAAGAAATCCAGTAGT_1	-25.9227	72.1064	Periportal_LSECs
P1TLH_CGTAGGCTCTGTCTCG_1	-41.8432	36.3898	Central_venous_LSECs
P3TLH_GACTGCGTCACAACGT_1	-67.4729	14.9055	Macrophage
P4TLH_GCCAAATCAACACGCC_1	-7.37038	36.4257	B_cells
P5TLH_CGTTCTGAGATACACA_1	29.6257	36.4544	T_NK
P5TLH_CTCTAATAGGGTGTTG_1	-15.2548	-57.1377	Macrophage
P1TLH_CGTAGGCAGTTGTAGA_1	-4.61258	-82.4228	Hepatocytes
P3TLH_CAGGTGCAGATCTGAA_1	-4.05031	-37.4271	Hepatocytes
P5TLH_TTTCCTCAGTGGTAAT_1	-48.2584	-15.1065	Macrophage
P3TLH_CCTCTGAAGCTCTCGG_1	10.5664	-33.3243	Hepatocytes
P4TLH_ACTTGTTTCAATCTCT_1	71.4085	27.6101	T_NK
P3TLH_AGATCTGAGCTACCGC_1	-25.9698	73.1505	Periportal_LSECs
P2TLH_TCTGAGAAGTACGTTC_1	-67.2035	16.777	Macrophage
P1TLH_CAGGTGCTCTTTACAC_1	42.8084	59.1161	T_NK
P3TLH_TTGTAGGTCTCTTATG_1	16.9627	-4.67923	Hepatocytes
P3TLH_AATCGGTGTAGCACGA_1	-7.25002	-32.6313	Hepatocytes
P3TLH_CGGACTGTCTACCAGA_1	-65.418	2.25808	Macrophage
P5TLH_ATGGGAGGTCGTCTTC_1	-28.3164	53.5633	Periportal_LSECs
P4TLH_AACCATGAGATGCCTT_1	-59.0384	-19.7737	Macrophage
P3TLH_TGACTAGCATACGCTA_1	18.6085	-12.6629	Hepatocytes
P2TLH_GTCGTAACACCCATGG_1	-45.9089	-50.5469	Hepatocytes
P1TLH_GACACGCCAGCGATCC_1	-44.5933	39.709	Central_venous_LSECs
P3TLH_TGACGGCCACTTCTGC_1	-7.04329	-22.7748	Hepatocytes
P2TLH_TCCACACAGTACGTTC_1	-25.1578	-56.9792	Hepatocytes
P2TLH_CCTTCGATCAAGCCTA_1	-42.1905	6.3396	Macrophage
P3TLH_GGTGCGTTCCAACCAA_1	-1.46531	-10.2831	Hepatocytes
P4TLH_CGGACACGTGCAGACA_1	-14.1781	0.831372	Hepatocytes
P3TLH_AGCTCTCAGCTGGAAC_1	1.42844	-31.099	Hepatocytes
P3TLH_GGACAGATCTAGCACA_1	41.354	-23.9975	Hepatocytes
P5TLH_AACTCCCGTGGAAAGA_1	22.7671	21.4027	T_NK
P4TLH_AGATCTGCATGTTGAC_1	-59.2561	-1.51209	Macrophage
P4TLH_CGTAGGCTCATCTGCC_1	-74.4876	8.01019	Macrophage
P2TLH_GTGAAGGGTCCGAATT_1	-26.7281	-65.1487	Hepatocytes
P2TLH_TACGGATCATATGGTC_1	-35.6155	-62.7186	Hepatocytes
P2TLH_AAGGCAGTCCCTTGTG_1	-37.7612	-54.8456	Hepatocytes
P1TLH_AGGTCCGTCGCCCTTA_1	52.2717	30.6617	T_NK
P2TLH_ATCATGGAGACCGGAT_1	-37.2801	-57.5319	Hepatocytes
P1TLH_CGTCAGGGTCGCTTTC_1	-40.9783	39.3675	Central_venous_LSECs
P5TLH_ATGAGGGTCTTCATGT_1	38.975	34.4317	T_NK
P3TLH_GTCTTCGAGGCTACGA_1	-8.68818	-15.767	Hepatocytes
P5TLH_CACACAAAGAACTCGG_1	-68.2051	13.2053	Macrophage
P3TLH_AGCATACGTAAGAGGA_1	-16.5523	-8.49948	Hepatocytes
P5TLH_AACCGCGTCGTCCGTT_1	61.9214	-3.54849	T_NK
P3TLH_CGTAGCGCAGCCTGTG_1	32.5747	-22.5249	Hepatocytes
P1TLH_TTTGTCAGTCAAAGCG_1	-52.5513	22.4511	Macrophage
P3TLH_GAACCTAAGACCTAGG_1	18.9606	-7.49452	Hepatocytes
P5TLH_GTTCTCGAGTCGTACT_1	-40.7951	47.702	Central_venous_LSECs
P3TLH_AGCTTGATCCTATTCA_1	32.596	-14.8077	Hepatocytes
P5TLH_GGACATTAGTATGACA_1	-14.2352	37.4036	B_cells
P5TLH_CCCAATCGTCAGTGGA_1	0.0303223	71.3244	B_cells
P4TLH_ACTTACTCAACACGCC_1	68.9203	29.569	T_NK
P4TLH_TCGCGTTTCAAAGTAG_1	-48.5804	-0.569042	Macrophage
P3TLH_CACACTCTCTGGGCCA_1	18.2111	-31.7856	Hepatocytes
P3TLH_AACACGTGTAAACGCG_1	-2.78592	-32.3237	Hepatocytes
P3TLH_GCAAACTAGAGTACAT_1	39.6332	-20.5697	Hepatocytes
P3TLH_GTCATTTGTGTGACGA_1	30.235	-44.9557	Hepatocytes
P2TLH_TGGTTCCAGGCGATAC_1	-28.1843	-60.6711	Hepatocytes
P2TLH_TACAGTGGTGGTCCGT_1	-48.4079	-54.9152	Hepatocytes
P3TLH_CGAGAAGAGTACGTAA_1	16.1278	-20.6406	Hepatocytes
P3TLH_CCTTCCCTCACCCTCA_1	23.0674	-20.0552	Hepatocytes
P3TLH_ATGCGATGTTGATTGC_1	12.1162	-44.7275	Hepatocytes
P1TLH_ATGAGGGTCTGTCAAG_1	-2.8804	-82.9692	Hepatocytes
P4TLH_CGAGCACTCACTCCTG_1	-43.9635	55.4631	Central_venous_LSECs
P2TLH_AGATTGCAGAAGGACA_1	-1.65959	28.3003	B_cells
P3TLH_AGCGTATTCACCTCGT_1	34.8553	-27.0477	Hepatocytes
P4TLH_TGCCCTAAGACTGGGT_1	-56.2724	12.6954	Macrophage
P3TLH_TAGAGCTGTGGGTATG_1	-11.6085	-23.7155	Hepatocytes
P1TLH_CGACCTTAGTCTTGCA_1	39.9267	60.0988	T_NK
P3TLH_TTGCCGTTCGATGAGG_1	-6.80338	-18.7825	Hepatocytes
P5TLH_CTGAAGTAGGCTCTTA_1	-45.5089	-12.274	Macrophage
P2TLH_AGAATAGTCCACGTGG_1	-37.7718	-63.6327	Hepatocytes
P1TLH_TGAGGGACAAATACAG_1	76.9205	14.4152	T_NK
P4TLH_GTAACGTCAATCCGAT_1	-29.9723	50.4408	Periportal_LSECs
P3TLH_GGCCGATCAATGAAAC_1	-25.2671	59.5763	Periportal_LSECs
P5TLH_TTGGCAATCTGAGGGA_1	34.027	28.0951	T_NK
P2TLH_TTAGGACCAAGAAAGG_1	-55.7554	15.2818	Macrophage
P2TLH_GTCACGGGTAGTAGTA_1	-24.1788	-55.4638	Hepatocytes
P5TLH_GTTAAGCAGGCTAGCA_1	13.871	23.3899	T_NK
P2TLH_ACTGTCCTCTTCAACT_1	-7.60288	30.4847	B_cells
P4TLH_ATTACTCAGATCCCGC_1	-11.4794	35.8563	B_cells
P1TLH_TCTCATAAGCGATCCC_1	-61.3103	-25.7892	Macrophage
P4TLH_TGCGCAGGTCATACTG_1	52.9607	38.2606	B_cells
P5TLH_GGCTCGAAGTGTGAAT_1	-32.6223	63.3586	Periportal_LSECs
P1TLH_TAGACCATCATCTGCC_1	34.5493	61.61	T_NK
P5TLH_CTTACCGAGATCGATA_1	-14.611	40.0867	B_cells
P2TLH_GTGCAGCAGTCCGGTC_1	-24.8235	-67.3008	Hepatocytes
P3TLH_ATCGAGTGTTTACTCT_1	0.361887	-23.9649	Hepatocytes
P1TLH_TTATGCTGTAGCTGCC_1	-57.1112	-25.9472	Macrophage
P3TLH_GGGAGATGTCTCTCGT_1	1.88908	-39.6292	Hepatocytes
P5TLH_TTGTAGGAGAGTCGGT_1	28.0153	34.3343	T_NK
P4TLH_TAAGAGATCAGCAACT_1	-61.5241	-1.44789	Macrophage
P1TLH_ATGAGGGGTATATCCG_1	79.1124	15.5326	T_NK
P3TLH_GGCGACTGTAGCGCAA_1	10.6231	-48.7836	Hepatocytes
P3TLH_GAACATCAGGCTACGA_1	6.21563	-21.9791	Hepatocytes
P3TLH_TCGTACCGTTGGACCC_1	-3.24558	-13.3988	Hepatocytes
P5TLH_GGCGACTGTAGGAGTC_1	-28.2705	60.9905	Periportal_LSECs
P1TLH_TTCTACACATTGGTAC_1	-59.1712	-8.66326	Macrophage
P1TLH_CACACCTCACGGTGTC_1	-4.33057	-84.459	Hepatocytes
P3TLH_CGAGAAGAGAGGGATA_1	32.8633	-45.2661	Hepatocytes
P4TLH_TCTCATAGTTAAAGTG_1	-57.8254	11.7558	Macrophage
P1TLH_CCTAAAGCAGCGATCC_1	-5.34809	-81.6918	Hepatocytes
P1TLH_ATGAGGGAGGAACTGC_1	-46.0865	44.3379	Central_venous_LSECs
P3TLH_ATGGGAGAGGAGTTGC_1	18.6552	-25.8645	Hepatocytes
P3TLH_GACGGCTAGTTATCGC_1	6.07147	-21.8572	Hepatocytes
P5TLH_GTCTTCGAGTGGTCCC_1	20.9433	30.1315	T_NK
P3TLH_TACTTACCAAAGAATC_1	32.1485	-51.1147	Hepatocytes
P4TLH_GAAACTCTCTAACTGG_1	-55.9974	-7.65603	Macrophage
P4TLH_GAACGGATCCACTCCA_1	-28.2707	15.9188	Cholangiocytes
P2TLH_GCGCAACTCCGTAGTA_1	-8.66501	25.0379	B_cells
P2TLH_GGGAGATCAGGGTATG_1	-20.929	19.7568	B_cells
P5TLH_GTACTTTGTACAGCAG_1	39.3163	12.8042	T_NK
P5TLH_TCAGGTATCGAATGCT_1	15.8969	23.0232	T_NK
P5TLH_AACTGGTCACATCCAA_1	-1.26027	70.9505	B_cells
P4TLH_CACCTTGAGAGCTGGT_1	59.0552	25.7806	T_NK
P1TLH_GACCAATAGCGTAATA_1	42.1494	61.2781	T_NK
P3TLH_TACCTATGTCCGTGAC_1	-5.63413	-40.6379	Hepatocytes
P4TLH_TTGAACGGTTCTGAAC_1	24.0431	49.6159	T_NK
P3TLH_TCCCGATGTGTCTGAT_1	24.6005	-4.69997	Hepatocytes
P5TLH_GGAGCAATCGAATGCT_1	-26.4954	64.5464	Periportal_LSECs
P5TLH_TTGAACGTCGAACTGT_1	49.1724	9.75749	T_NK
P2TLH_TGCTACCGTTGATTGC_1	-40.8977	-61.8545	Hepatocytes
P5TLH_TTCGGTCCATGTTCCC_1	66.0366	-1.95376	T_NK
P5TLH_CATATGGGTGAGTGAC_1	47.4151	9.71852	T_NK
P3TLH_TAAGAGAGTTAGGGTG_1	31.4218	-26.7811	Hepatocytes
P3TLH_GGGATGAAGCGTTTAC_1	31.7189	-15.9741	Hepatocytes
P5TLH_TTGCCGTCATGGTAGG_1	-54.5132	-17.938	Macrophage
P4TLH_CTAATGGCATGTCTCC_1	34.1544	42.8156	T_NK
P3TLH_ATTGGTGGTAGGGTAC_1	-2.9982	-36.964	Hepatocytes
P4TLH_CCTTACGGTTAGGGTG_1	71.8288	22.0102	T_NK
P5TLH_CCGGTAGAGTGGGATC_1	66.3849	-5.19406	T_NK
P3TLH_AATCGGTAGGAGCGTT_1	33.252	-31.4223	Hepatocytes
P2TLH_TGGGCGTAGGCTAGCA_1	-10.8102	23.7357	B_cells
P5TLH_ACGATACAGGTTCCTA_1	-49.7933	-15.4811	Macrophage
P5TLH_CAGTCCTTCCTCAACC_1	11.2909	-72.7171	Hepatocytes
P3TLH_CCTTCCCTCATCGCTC_1	32.9701	-57.1142	Hepatocytes
P3TLH_GATTCAGGTGTGGTTT_1	15.1581	-42.7113	Hepatocytes
P3TLH_CAGAATCTCCCATTTA_1	6.96713	-23.2681	Hepatocytes
P5TLH_CATGCCTAGCCAGTTT_1	51.2456	10.4243	T_NK
P3TLH_TTTGGTTAGATGGCGT_1	15.1013	2.17402	Hepatocytes
P5TLH_TTCGAAGTCCGTCATC_1	68.8837	-7.91075	T_NK
P3TLH_TCGGTAATCGTGGGAA_1	-19.7555	-24.1145	Hepatocytes
P3TLH_CTAGAGTCAACTTGAC_1	-47.8356	-46.3912	Hepatocytes
P2TLH_CTAATGGAGCAGGTCA_1	-24.7835	-72.3143	Hepatocytes
P4TLH_CGCTTCAGTTCCTCCA_1	61.2659	25.1358	T_NK
P1TLH_GACAGAGAGAAACCGC_1	-13.4899	-1.53725	Hepatocytes
P5TLH_TGCACCTAGTGGTAAT_1	9.23946	-71.4066	Hepatocytes
P1TLH_CGTTGGGGTATTACCG_1	79.6702	9.64852	T_NK
P5TLH_CACAAACGTTCCGTCT_1	-57.4744	16.3213	Macrophage
P5TLH_GGATGTTGTGCACGAA_1	-47.9335	-17.3117	Macrophage
P1TLH_TGGGAAGGTGAAATCA_1	43.579	64.8615	T_NK
P3TLH_CGTTAGATCGCCAAAT_1	10.8192	-40.3766	Hepatocytes
P4TLH_ACGCAGCGTACCGCTG_1	21.6584	52.4373	T_NK
P3TLH_TTTCCTCAGCGGCTTC_1	-7.91844	-13.7204	Hepatocytes
P4TLH_CATTCGCCATACTACG_1	14.6637	48.8648	T_NK
P1TLH_ACCAGTAAGCCTCGTG_1	-46.5571	48.2775	Central_venous_LSECs
P3TLH_TTCTCAAGTCCAGTGC_1	-17.8491	-9.33074	Hepatocytes
P3TLH_GCCTCTACACTATCTT_1	27.8613	-5.93386	Hepatocytes
P1TLH_CCCAGTTCACAGTCGC_1	3.70988	72.1376	B_cells
P1TLH_ACGAGGAGTGCGAAAC_1	-4.11744	-82.426	Hepatocytes
P5TLH_CCTTCCCTCGCCTGAG_1	38.2059	33.8423	T_NK
P3TLH_CCAATCCGTTCCCGAG_1	3.51161	-16.5916	Hepatocytes
P1TLH_GTGCATATCTAACTTC_1	55.9596	42.0633	T_NK
P1TLH_GATCAGTGTGAGGGTT_1	-59.4775	-22.7846	Macrophage
P1TLH_CACCACTGTACGCTGC_1	40.2006	58.4277	T_NK
P3TLH_CTTTGCGTCCTAGAAC_1	37.2177	-19.2145	Hepatocytes
P2TLH_GAGGTGACAGACTCGC_1	-11.6421	26.8511	B_cells
P4TLH_TAGTGGTGTACCGTAT_1	23.2539	51.5363	T_NK
P3TLH_AATCGGTGTGCTCTTC_1	-16.4684	-11.7216	Hepatocytes
P5TLH_CCTACACAGACTCGGA_1	23.0102	24.9102	T_NK
P2TLH_ATGTGTGAGTCATCCA_1	-44.9016	10.7619	Macrophage
P4TLH_TGCCCTACATAAGACA_1	21.5098	44.1122	T_NK
P4TLH_AAGGCAGAGCCACGCT_1	72.9133	30.1324	T_NK
P3TLH_GCTTGAAAGATGCGAC_1	-73.5124	-9.41603	Macrophage
P3TLH_CGCTATCCAGTGACAG_1	13.319	-19.426	Hepatocytes
P1TLH_GGCTCGAAGAAGCCCA_1	-48.9142	1.82046	Macrophage
P3TLH_GCCAAATGTAGGCATG_1	19.6217	-42.4011	Hepatocytes
P5TLH_CATCCACGTTCAGTAC_1	64.8262	-5.83029	T_NK
P2TLH_TAAGAGAGTCGTCTTC_1	-29.7325	-63.9829	Hepatocytes
P1TLH_TTCTTAGTCTTGTTTG_1	42.5375	65.3012	T_NK
P3TLH_CAAGAAAAGGCAGTCA_1	22.2017	-4.94022	Hepatocytes
P3TLH_ATGCGATCATAAGACA_1	33.2201	-15.6448	Hepatocytes
P2TLH_ACGAGGAAGTGGTAGC_1	-65.6999	17.2403	Macrophage
P2TLH_GCTGCGATCTGTTTGT_1	-27.252	-50.1474	Hepatocytes
P2TLH_TGAGGGAGTTGAGTTC_1	-5.13627	30.7977	B_cells
P3TLH_GTCGGGTGTAACGTTC_1	28.7566	-28.6754	Hepatocytes
P5TLH_TTCTCCTGTCCGAATT_1	7.3709	-67.6866	Hepatocytes
P2TLH_TCTGGAATCTTGTTTG_1	-38.2926	52.3573	Central_venous_LSECs
P3TLH_CGGACTGTCAGCATGT_1	-17.5706	-8.42034	Hepatocytes
P5TLH_ATGAGGGAGGGCTCTC_1	53.1689	10.4979	T_NK
P2TLH_CCTTACGGTCAGGACA_1	1.46123	20.5319	B_cells
P2TLH_TACCTATTCGGCTTGG_1	-43.9341	-47.551	Hepatocytes
P3TLH_GGGATGAGTCCGAACC_1	-6.57986	-14.8485	Hepatocytes
P3TLH_CATTATCGTTCAGTAC_1	19.3282	-36.9553	Hepatocytes
P1TLH_GAACGGATCGTATCAG_1	76.7419	15.8563	T_NK
P3TLH_CTAGAGTAGATGGCGT_1	24.5276	-52.4438	Hepatocytes
P1TLH_AAACGGGGTTCGGGCT_1	42.3655	59	T_NK
P3TLH_AGAGTGGGTCAGAGGT_1	-35.1754	64.7071	Periportal_LSECs
P3TLH_TTAGTTCGTCGTTGTA_1	-12.1634	-26.2444	Hepatocytes
P3TLH_CTAGTGAGTAAGTGTA_1	-14.0307	-20.7703	Hepatocytes
P5TLH_ATGTGTGGTAGCCTAT_1	63.5532	3.66976	T_NK
P4TLH_ATGGGAGTCGCCGTGA_1	69.3891	24.913	T_NK
P3TLH_GCATGATAGTTCCACA_1	-27.9939	19.0482	Cholangiocytes
P3TLH_GATCGATTCAAGGTAA_1	19.3854	-11.2836	Hepatocytes
P3TLH_AAAGTAGCATGGAATA_1	-62.783	-15.3725	Macrophage
P5TLH_GACTGCGAGCAAATCA_1	-50.3243	-9.58659	Macrophage
P3TLH_ACAGCTAAGATGAGAG_1	33.5238	-7.36151	Hepatocytes
P5TLH_ACGATACGTCCTAGCG_1	50.6396	11.0127	T_NK
P5TLH_TTGCGTCCAATGGTCT_1	32.3424	17.0236	T_NK
P2TLH_CATCGAAAGCGCTTAT_1	-71.6409	16.7796	Macrophage
P3TLH_GATCAGTTCACAATGC_1	-2.03429	-13.9243	Hepatocytes
P2TLH_CCTTTCTAGGACAGAA_1	-25.903	-67.0047	Hepatocytes
P1TLH_CCCTCCTTCTCTTATG_1	43.4199	59.6427	T_NK
P4TLH_ACAGCCGTCGAACTGT_1	-62.1712	-5.70623	Macrophage
P2TLH_ATCTGCCCATGTCGAT_1	-14.6794	29.9117	B_cells
P3TLH_GATCGCGCAACTTGAC_1	25.5012	-15.5927	Hepatocytes
P5TLH_TCCACACCATTGGGCC_1	-47.439	-17.9626	Macrophage
P1TLH_GTACTCCCAGATGGGT_1	43.701	59.2787	T_NK
P5TLH_AGAGCTTTCATCACCC_1	-29.3777	59.2787	Periportal_LSECs
P5TLH_CTAACTTAGCTACCGC_1	61.5633	5.68844	T_NK
P1TLH_CTGTTTAAGGAATGGA_1	-46.0358	47.0028	Central_venous_LSECs
P3TLH_TCGTACCAGGCACATG_1	-26.9844	18.566	Cholangiocytes
P5TLH_CGCGTTTGTGATAAAC_1	43.6806	12.9758	T_NK
P2TLH_ACGTCAATCTGTCTAT_1	-14.3742	29.9114	B_cells
P3TLH_AAATGCCGTGACAAAT_1	-59.0113	-20.9483	Macrophage
P4TLH_CTAGCCTGTCACTGGC_1	70.6935	25.3676	T_NK
P1TLH_ACTGATGCATAAGACA_1	-61.314	-24.6814	Macrophage
P3TLH_GTTCGGGCAGACAGGT_1	-10.3218	-18.3492	Hepatocytes
P5TLH_GCATGTATCTCGTATT_1	51.5165	13.4806	T_NK
P2TLH_GACGCGTGTGTGACGA_1	-10.0523	29.8035	B_cells
P5TLH_GGTGTTATCCAAACTG_1	22.768	21.6985	T_NK
P5TLH_AAAGCAATCTTCTGGC_1	63.2954	3.32593	T_NK
P2TLH_AGATTGCAGTAGTGCG_1	-31.8013	71.2286	Periportal_LSECs
P2TLH_GAATGAATCCGTCATC_1	-9.68174	33.2456	B_cells
P5TLH_AAGCCGCGTGATAAAC_1	48.8928	10.1584	T_NK
P4TLH_GTCACGGAGGAGTAGA_1	37.6271	42.3602	T_NK
P4TLH_AATCCAGTCAGCTTAG_1	65.6942	29.529	T_NK
P3TLH_CAACCTCAGCTAGGCA_1	29.1739	-24.646	Hepatocytes
P5TLH_GGTGTTATCGTTTGCC_1	28.9361	28.3088	T_NK
P3TLH_AAGCCGCGTGATAAAC_1	29.5156	-44.0274	Hepatocytes
P1TLH_GCACATAGTTCGTTGA_1	38.822	61.9614	T_NK
P5TLH_GGGTTGCCATGTCGAT_1	10.451	-73.4397	Hepatocytes
P5TLH_AGCATACAGGGTCTCC_1	15.9697	24.9329	T_NK
P3TLH_AAACGGGTCGGAGGTA_1	-52.1022	3.94487	Macrophage
P4TLH_CTCGAGGAGGTTACCT_1	28.2773	49.7403	T_NK
P3TLH_TGACTAGTCCCTTGTG_1	21.6769	-49.2602	Hepatocytes
P1TLH_TCTTCGGAGAAACGCC_1	-35.5213	55.84	Central_venous_LSECs
P4TLH_CCAGCGATCACAGGCC_1	-40.6096	50.7364	Central_venous_LSECs
P2TLH_ACTTGTTGTTGATTGC_1	2.2803	27.494	B_cells
P5TLH_CAGCCGATCCGCGTTT_1	28.3543	21.8609	T_NK
P3TLH_TTTCCTCCACCAGGTC_1	20.3084	-6.80382	Hepatocytes
P5TLH_CTAGCCTCAAGACACG_1	26.753	34.9747	T_NK
P5TLH_CAAGGCCCACCCATTC_1	27.2681	26.5619	T_NK
P2TLH_CTACGTCAGTTAGCGG_1	-32.0969	71.3115	Periportal_LSECs
P2TLH_TGACAACAGCCAACAG_1	-28.8067	-61.2368	Hepatocytes
P4TLH_CATCGGGCATTCTTAC_1	4.25703	67.6352	B_cells
P4TLH_GAATAAGGTCACTTCC_1	8.05164	-64.4851	Hepatocytes
P2TLH_CATGACACATCTACGA_1	-27.273	65.2663	Periportal_LSECs
P5TLH_TGGCGCAGTAGCTCCG_1	-53.8638	-20.5318	Macrophage
P5TLH_TGGTTAGTCCGAACGC_1	-51.5581	-16.3789	Macrophage
P5TLH_GTCACGGCATGCTAGT_1	2.86436	-70.063	Hepatocytes
P3TLH_CGATGTAGTCTGCAAT_1	2.1851	-25.0956	Hepatocytes
P5TLH_GTCCTCAAGAGTAAGG_1	32.0082	18.7773	T_NK
P2TLH_GTCCTCAGTCATATCG_1	-25.5762	60.0022	Periportal_LSECs
P4TLH_TCTTTCCGTATATGGA_1	40.9846	49.2145	T_NK
P4TLH_GGACGTCAGTGTGAAT_1	-63.8076	-7.25757	Macrophage
P4TLH_CTCCTAGTCGTAGGTT_1	74.1589	23.9136	T_NK
P3TLH_CGAACATAGCTCCTCT_1	30.6307	-17.9002	Hepatocytes
P4TLH_AGATTGCGTCAAGCGA_1	3.01746	62.2427	B_cells
P4TLH_ACATACGGTGGTCCGT_1	19.2398	49.0996	T_NK
P5TLH_CGCCAAGGTCTACCTC_1	-57.5721	1.07784	Macrophage
P3TLH_GTGCATAGTTCCCTTG_1	-22.0391	-8.9062	Hepatocytes
P5TLH_ATAAGAGAGATAGTCA_1	65.044	-4.24718	T_NK
P1TLH_TACTTACCACGAGAGT_1	79.5553	9.22736	T_NK
P2TLH_CATATGGAGGATGGAA_1	-9.6451	32.017	B_cells
P1TLH_CCATGTCTCTGTCTCG_1	-73.9472	9.59115	Macrophage
P3TLH_GTTTCTAGTTCAGACT_1	-20.7377	-22.5635	Hepatocytes
P1TLH_GGACAGAAGAGCTATA_1	29.9762	66.4513	T_NK
P1TLH_CCGGTAGCATACAGCT_1	-57.735	-24.3658	Macrophage
P1TLH_TAGAGCTGTTCGTTGA_1	-50.7118	21.9754	Macrophage
P4TLH_CTAGAGTCACTCAGGC_1	44.9722	47.7228	T_NK
P5TLH_CATCGAAAGAAACCGC_1	64.0074	-1.11028	T_NK
P3TLH_ACTTACTGTGCACTTA_1	36.5385	-6.34807	Hepatocytes
P1TLH_CAGTCCTAGTGTTTGC_1	-45.3721	-3.62002	Macrophage
P3TLH_AACTCCCTCACGGTTA_1	-54.0893	10.3614	Macrophage
P3TLH_TCACAAGCACGGTGTC_1	29.0843	-47.4874	Hepatocytes
P3TLH_TGCACCTAGGAATCGC_1	-11.382	-24.5398	Hepatocytes
P2TLH_CGTGTCTCATTTGCCC_1	-3.9139	27.2667	B_cells
P1TLH_CTAAGACAGCGCCTCA_1	-35.3406	55.0181	Central_venous_LSECs
P4TLH_AGCGGTCGTAAGGGAA_1	-13.1715	0.892509	Hepatocytes
P3TLH_ACTTTCACATACTCTT_1	-68.4212	-9.15452	Macrophage
P5TLH_GCATACATCACAATGC_1	40.3303	11.7254	T_NK
P2TLH_TCGCGTTAGACTTGAA_1	-13.6608	42.2021	B_cells
P1TLH_CGGGTCAAGGCCGAAT_1	-45.6045	2.90112	Macrophage
P4TLH_AAAGTAGAGGTTCCTA_1	70.8502	27.6077	T_NK
P3TLH_AGTGGGAAGACTAGGC_1	37.177	-6.64176	Hepatocytes
P5TLH_GACCTGGTCGCCATAA_1	21.5677	25.6995	T_NK
P3TLH_CATTCGCCATCAGTAC_1	19.0257	-13.4032	Hepatocytes
P2TLH_AGGCCACGTGCACCAC_1	-42.9603	-54.8913	Hepatocytes
P5TLH_CTGCGGAAGTGGTAAT_1	70.9315	-2.25985	T_NK
P1TLH_CTTACCGTCGTCTGAA_1	-45.6987	55.6559	Central_venous_LSECs
P3TLH_AACGTTGTCACAAACC_1	3.64916	-39.8578	Hepatocytes
P4TLH_ATCGAGTCAATCCGAT_1	-18.4054	32.0571	B_cells
P3TLH_ACATCAGGTTCTGGTA_1	23.8264	-27.5608	Hepatocytes
P3TLH_GAGCAGACAGTCAGCC_1	34.6663	-54.0619	Hepatocytes
P1TLH_CTTACCGCAATGGATA_1	32.3747	63.9249	T_NK
P3TLH_TCAGGTAAGGGTTTCT_1	23.397	-12.1494	Hepatocytes
P4TLH_TGGTTCCCAGGGATTG_1	72.926	34.8255	T_NK
P5TLH_CGAACATTCTGCAAGT_1	-27.2613	14.4463	Cholangiocytes
P3TLH_GGACGTCAGCAAATCA_1	25.814	-16.2808	Hepatocytes
P5TLH_CGGAGCTCATGCGCAC_1	-0.679253	71.525	B_cells
P2TLH_ACTTGTTCAGTGAGTG_1	-41.0351	-62.1858	Hepatocytes
P2TLH_TCATTTGCAGTGGAGT_1	-17.4064	26.0919	B_cells
P3TLH_ACGTCAAGTTACGCGC_1	28.9889	-46.1022	Hepatocytes
P3TLH_ACGATGTAGCTAACTC_1	-22.6573	-6.61828	Hepatocytes
P5TLH_GACACGCCAAATCCGT_1	18.8406	28.1954	T_NK
P4TLH_CTTCTCTAGGCCATAG_1	20.8034	53.1345	T_NK
P3TLH_TTGAACGAGGTGATTA_1	-71.9832	-4.78073	Macrophage
P4TLH_ACCCACTCAATGGAGC_1	-59.3556	-14.2866	Macrophage
P2TLH_AGAGCGAAGAACAATC_1	-6.92047	41.3859	B_cells
P3TLH_TACGGGCCAGTCCTTC_1	22.789	-20.9594	Hepatocytes
P3TLH_GACACGCAGCTAGTTC_1	16.3839	-7.3471	Hepatocytes
P3TLH_ATCCGAAAGTTACCCA_1	36.2527	-12.551	Hepatocytes
P5TLH_CTCGAGGAGTCGCCGT_1	-40.8851	47.7935	Central_venous_LSECs
P4TLH_GAACCTACAATGAATG_1	70.6788	23.4907	T_NK
P2TLH_GTACGTAAGAGCTGCA_1	-32.0725	-60.5615	Hepatocytes
P1TLH_GTGCTTCGTGCACCAC_1	-53.7719	22.5623	Macrophage
P1TLH_CTTTGCGAGGATGTAT_1	-50.6021	21.501	Macrophage
P1TLH_CATCCACCATGAAGTA_1	36.2289	62.8309	T_NK
P3TLH_TCATTACAGTACACCT_1	12.1593	-24.6992	Hepatocytes
P2TLH_AGTGGGAAGGGAACGG_1	-23.2341	-57.7713	Hepatocytes
P3TLH_ACGGCCATCGGATGGA_1	-40.2924	50.9259	Central_venous_LSECs
P1TLH_CTAGAGTCAGCTGTGC_1	36.0475	43.2236	T_NK
P5TLH_CGTCTACCAGTATCTG_1	9.58628	-74.3577	Hepatocytes
P5TLH_GTAGGCCAGTGCGTGA_1	17.0541	22.9051	T_NK
P3TLH_AGGCCACAGTGTTAGA_1	4.82068	-21.4543	Hepatocytes
P3TLH_CGGACTGCAAACTGCT_1	2.55555	-16.2558	Hepatocytes
P3TLH_CGTGTAAAGTGGGATC_1	8.32722	-9.19733	Hepatocytes
P4TLH_CGGCTAGAGCGATTCT_1	-61.3054	-16.3769	Macrophage
P1TLH_CCTTACGCAGGGATTG_1	79.084	15.7815	T_NK
P3TLH_AGACGTTTCAGTTAGC_1	-5.80519	-33.2307	Hepatocytes
P5TLH_ACACCCTCAGGTTTCA_1	9.86872	-70.0139	Hepatocytes
P3TLH_CCTTCCCCAGCTCGCA_1	32.065	-45.4706	Hepatocytes
P4TLH_GGACGTCGTGAGGGTT_1	43.7368	38.0804	T_NK
P3TLH_GTGTTAGCATGGAATA_1	23.3141	-16.8323	Hepatocytes
P3TLH_ATAAGAGAGATGCCTT_1	-72.4978	17.9064	Macrophage
P3TLH_TATGCCCGTCTTCTCG_1	14.0867	-14.7665	Hepatocytes
P2TLH_GCTGCAGCAGGCTGAA_1	-45.9701	12.1626	Macrophage
P3TLH_CTTCTCTAGATGTGTA_1	-0.34673	-38.8842	Hepatocytes
P3TLH_ATGCGATAGCGGCTTC_1	16.4566	-29.6098	Hepatocytes
P5TLH_CACATAGCAAGCCCAC_1	-54.989	2.46839	Macrophage
P2TLH_AAAGATGGTGTAACGG_1	-28.8598	-61.1329	Hepatocytes
P2TLH_TCAGGATTCAGTTCGA_1	-45.2194	-49.3603	Hepatocytes
P3TLH_CCTATTACAAGTTGTC_1	22.2566	-30.3005	Hepatocytes
P4TLH_AGGTCATTCCGTCATC_1	14.2974	48.9218	T_NK
P3TLH_GAATGAAGTCCAGTGC_1	20.3471	-47.3517	Hepatocytes
P2TLH_GCAGCCATCAGTTCGA_1	-27.0539	67.132	Periportal_LSECs
P5TLH_GAAGCAGAGAGCTTCT_1	48.2949	9.66921	T_NK
P3TLH_AACTTTCTCAACTCTT_1	16.4255	-29.5003	Hepatocytes
P3TLH_GCATACAGTAGCACGA_1	10.2667	-28.1378	Hepatocytes
P5TLH_TGGCTGGAGATTACCC_1	24.5458	36.0333	T_NK
P3TLH_GTTTCTAAGTACGTTC_1	25.9867	-6.53709	Hepatocytes
P2TLH_ACTATCTTCCCACTTG_1	-28.1333	-69.5877	Hepatocytes
P1TLH_TCATTACTCGTAGATC_1	53.3368	30.108	T_NK
P1TLH_AACCGCGTCGTGGACC_1	36.4865	60.34	T_NK
P3TLH_CGTAGCGTCAGTACGT_1	13.1945	1.69607	Hepatocytes
P5TLH_GTTTCTACAGCTCGCA_1	67.8811	-6.34916	T_NK
P3TLH_ATAACGCTCCCACTTG_1	30.8193	-57.5408	Hepatocytes
P5TLH_CTCGAGGAGGGCACTA_1	-53.0625	-11.1575	Macrophage
P4TLH_AAACGGGGTCATACTG_1	-9.44798	18.284	T_NK
P2TLH_TAAACCGTCACCGGGT_1	-1.12268	20.7691	B_cells
P3TLH_CGATGGCCAGTTTACG_1	-1.0104	-42.1733	Hepatocytes
P5TLH_TTCCCAGGTGGGTATG_1	34.5403	34.5767	T_NK
P2TLH_AGTGGGATCCGAACGC_1	-27.6302	17.4479	Cholangiocytes
P1TLH_CGTTGGGAGCTTTGGT_1	-30.1994	50.3715	Periportal_LSECs
P2TLH_GATGAGGTCCTTTCTC_1	-35.6682	-61.4943	Hepatocytes
P4TLH_GGGCACTAGACACTAA_1	-57.2752	9.31745	Macrophage
P4TLH_GCAAACTTCTGTGCAA_1	56.5721	27.9716	T_NK
P5TLH_TCAGCAATCTAACTCT_1	38.5767	16.7021	T_NK
P2TLH_TCTGGAACAGGGTACA_1	-31.7731	-61.0803	Hepatocytes
P3TLH_GCTGGGTCAGACGCTC_1	-18.5356	-28.0858	Hepatocytes
P1TLH_GAACATCCATCGACGC_1	-47.7729	41.7956	Central_venous_LSECs
P3TLH_CTACACCCACAAGACG_1	36.3983	-19.2664	Hepatocytes
P5TLH_GTTCATTCAGATCGGA_1	46.7994	15.395	T_NK
P3TLH_ACTGATGCACGGCTAC_1	19.6251	-8.6701	Hepatocytes
P2TLH_ACCAGTAGTTATTCTC_1	-25.7339	-71.0563	Hepatocytes
P3TLH_TAGACCAAGCTCTCGG_1	31.4999	-3.90937	Hepatocytes
P5TLH_CCTTTCTCAATGGTCT_1	-47.0813	-13.1936	Macrophage
P3TLH_AGCAGCCTCGACCAGC_1	-1.73983	-19.8784	Hepatocytes
P2TLH_CTCATTATCCAAACAC_1	-49.4825	-49.8954	Hepatocytes
P2TLH_CAGTCCTGTACTTGAC_1	-34.6091	62.8172	Periportal_LSECs
P3TLH_GCGCAGTTCTAACTCT_1	-0.927739	-22.8322	Hepatocytes
P3TLH_CGCTTCAAGTGTTTGC_1	19.0441	-50.4665	Hepatocytes
P5TLH_CGTCCATGTCAAAGAT_1	45.8947	13.3309	T_NK
P4TLH_ATTATCCAGCTGGAAC_1	71.8021	21.7017	T_NK
P3TLH_GTGCGGTGTTCGTGAT_1	-12.7461	-8.32159	Hepatocytes
P3TLH_TGTGTTTAGTTAAGTG_1	10.8249	-43.7316	Hepatocytes
P2TLH_CGTCAGGCACGCCAGT_1	-6.25573	31.3701	B_cells
P4TLH_AAACGGGAGCGTTTAC_1	71.7167	36.1923	Periportal_LSECs
P3TLH_ACGGGTCGTTTGACAC_1	-16.1174	-20.4756	Hepatocytes
P3TLH_AACCATGTCGGAGGTA_1	13.985	-23.4366	Hepatocytes
P2TLH_CCTAAAGGTGTGTGCC_1	-30.8496	-51.3197	Hepatocytes
P4TLH_AGTGGGATCAGGTTCA_1	65.4186	22.1476	T_NK
P4TLH_CGACTTCCAACAACCT_1	-60.4065	4.92473	Macrophage
P5TLH_TCACGAACACGAGGTA_1	29.5632	28.1556	T_NK
P5TLH_CAAGGCCGTCTTCAAG_1	-49.0973	-13.6501	Macrophage
P5TLH_GTCGTAAGTGTTGGGA_1	52.1239	11.1552	T_NK
P2TLH_TGCGTGGAGTAAGTAC_1	-27.6998	-61.9177	Hepatocytes
P2TLH_TCGTACCTCTTGTTTG_1	-2.3758	26.5592	B_cells
P2TLH_CAGCTAAGTCCAGTAT_1	-44.8889	-46.5837	Hepatocytes
P5TLH_CCTACACGTTGAGTTC_1	61.2017	0.227966	T_NK
P1TLH_GCGCCAATCTATCCTA_1	-63.5345	-23.7013	Macrophage
P5TLH_GATTCAGAGATGCGAC_1	27.5511	24.547	T_NK
P5TLH_GGGCACTGTCGATTGT_1	-27.4699	62.4302	Periportal_LSECs
P3TLH_AAGGTTCAGGCTAGGT_1	25.2847	-24.8662	Hepatocytes
P3TLH_GAGCAGAAGGGTATCG_1	15.3128	-3.3629	Hepatocytes
P1TLH_GTAGTCACATCGGGTC_1	-41.4899	42.8838	Central_venous_LSECs
P1TLH_TACCTTAGTACCGCTG_1	-50.4529	17.7152	Macrophage
P3TLH_GGACAAGTCAACGCTA_1	21.9205	-6.33448	Hepatocytes
P3TLH_AGTGTCAAGTACTTGC_1	20.4231	2.4316	Hepatocytes
P1TLH_CGTCACTAGTACATGA_1	-3.96782	-82.8954	Hepatocytes
P4TLH_TGTGTTTGTACCTACA_1	8.0804	-64.5072	Hepatocytes
P3TLH_AAGGTTCAGGCAGTCA_1	-0.518524	-35.4771	Hepatocytes
P3TLH_CACACTCGTGTTCGAT_1	21.8586	-50.2294	Hepatocytes
P3TLH_CTCGTCAGTAACGCGA_1	-78.5422	-5.15812	Macrophage
P3TLH_ATCATGGCATTTGCTT_1	26.1134	-7.99461	Hepatocytes
P2TLH_CCTTCGAGTAACGTTC_1	-30.2532	13.7194	Periportal_LSECs
P3TLH_GTGGGTCGTTACAGAA_1	-10.2748	-31.4527	Hepatocytes
P3TLH_GAGTCCGGTTTACTCT_1	7.96524	-32.8337	Hepatocytes
P3TLH_GATCGTACACAAGTAA_1	7.23381	-4.32721	Hepatocytes
P5TLH_CGCTTCATCAAACAAG_1	-50.0429	-10.356	Macrophage
P5TLH_AGCTCCTTCAAGGCTT_1	-54.8078	0.458092	Macrophage
P2TLH_CAAGATCGTCGACTAT_1	-39.962	-57.3773	Hepatocytes
P1TLH_CGGACACAGATGTGGC_1	-50.0235	21.592	Macrophage
P4TLH_CACAAACAGTACGACG_1	-73.5614	18.4515	Macrophage
P4TLH_AGATTGCGTGTTCTTT_1	71.9728	36.3213	T_NK
P4TLH_CGTCTACGTGGCTCCA_1	-63.9325	10.2218	Macrophage
P4TLH_ATCATCTAGTGCAAGC_1	-60.2398	-15.8661	Macrophage
P2TLH_ACTTTCACAAATCCGT_1	-2.64118	28.0616	B_cells
P2TLH_TGAAAGAGTTAAAGAC_1	-37.9303	-54.7071	Hepatocytes
P1TLH_GACGCGTAGACCTTTG_1	-3.09968	-78.0573	Hepatocytes
P3TLH_GTAACGTAGCGAAGGG_1	23.2558	-48.2444	Hepatocytes
P3TLH_CACAGTAGTTCCTCCA_1	37.1891	-12.8632	Hepatocytes
P3TLH_AAGACCTCATAACCTG_1	21.4025	-50.0112	Hepatocytes
P3TLH_CGGTTAACACATTCGA_1	28.6636	-37.0782	Hepatocytes
P5TLH_TTGGCAAGTTGACGTT_1	30.988	28.7837	T_NK
P3TLH_GCATGCGGTTGCCTCT_1	-7.23604	-36.1959	Hepatocytes
P4TLH_GATGCTATCCTAGGGC_1	-59.4782	-13.5963	Macrophage
P5TLH_TTTGTCATCCACGCAG_1	-51.0091	-19.4269	Macrophage
P3TLH_CTGCCTAAGTGTCCAT_1	-5.86164	-15.0498	Hepatocytes
P2TLH_CACAGTAAGTTCGATC_1	-41.6012	-54.5564	Hepatocytes
P5TLH_CCACTACTCACCTCGT_1	9.99974	-73.9041	Hepatocytes
P3TLH_GCGCGATCACGGTAAG_1	25.2115	-6.79396	Hepatocytes
P1TLH_TATCAGGTCTAACCGA_1	38.9649	62.2678	T_NK
P3TLH_TGGACGCAGCGAAGGG_1	-68.7847	15.2369	Macrophage
P4TLH_CTAGAGTTCCTTGCCA_1	71.2544	23.7333	T_NK
P5TLH_TCTTTCCAGTTGAGAT_1	45.865	13.137	T_NK
P4TLH_GATGAAAGTGTGAAAT_1	20.7505	49.4514	T_NK
P2TLH_ACATGGTTCTATGTGG_1	-48.8766	-49.4284	Hepatocytes
P3TLH_TGATTTCAGGCGTACA_1	23.9461	-13.1738	Hepatocytes
P2TLH_ACTATCTCAGCATGAG_1	-30.5386	-65.756	Hepatocytes
P5TLH_CCATTCGTCAACCATG_1	-48.2243	-11.9783	Macrophage
P3TLH_GCAAACTCAGCTGCAC_1	31.4044	-7.27163	Hepatocytes
P5TLH_CGATCGGTCTTCAACT_1	67.4214	-5.65989	T_NK
P1TLH_GGCAATTGTCGTGGCT_1	-62.1565	-26.5053	Macrophage
P5TLH_ATCTACTGTCTAGGTT_1	0.261915	-66.1898	Hepatocytes
P2TLH_CGCTATCAGCAACGGT_1	-39.4332	-53.6481	Hepatocytes
P2TLH_CAGCTAATCCAGGGCT_1	-48.3458	-56.1219	Hepatocytes
P3TLH_ACGCAGCAGGCTCATT_1	-51.7581	4.67825	Macrophage
P4TLH_AGATCTGGTCGTTGTA_1	72.7935	30.5977	T_NK
P5TLH_AACTTTCTCTGCAGTA_1	32.388	31.6686	T_NK
P2TLH_CACAGGCAGAGCAATT_1	-0.960504	28.1072	B_cells
P3TLH_GCTTGAAGTTCCACTC_1	-23.4647	-5.61327	Hepatocytes
P5TLH_CTGGTCTCAATAAGCA_1	67.7071	-8.44761	T_NK
P2TLH_AGAATAGGTCTTGCGG_1	-32.3903	-66.7698	Hepatocytes
P3TLH_AAGGAGCTCGGAAACG_1	34.5972	-4.12337	Hepatocytes
P1TLH_ACCAGTATCTATCCTA_1	-40.9463	38.2505	Central_venous_LSECs
P4TLH_GTCCTCAGTGCAGGTA_1	38.3009	42.9908	T_NK
P4TLH_CATGCCTGTAATAGCA_1	20.4999	53.6887	T_NK
P2TLH_CACAGTATCCTATGTT_1	-27.7423	56.7576	Periportal_LSECs
P3TLH_TCGGGACTCTGATACG_1	-18.2441	-24.6195	Hepatocytes
P4TLH_AGCGTCGTCTCCGGTT_1	28.439	50.8682	T_NK
P3TLH_GTTCATTAGATCCTGT_1	7.78989	-9.44918	Hepatocytes
P4TLH_CCTCTGATCGGTGTTA_1	-12.6039	1.58575	Hepatocytes
P3TLH_GAGGTGATCATGCAAC_1	-3.41683	-18.7574	Hepatocytes
P4TLH_AACTCAGTCTGTGCAA_1	-60.1746	-16.1338	Macrophage
P3TLH_CTGCTGTAGGTAAACT_1	31.8756	-52.8754	Hepatocytes
P2TLH_AGGCCACGTAGCGTAG_1	-46.1626	-53.9487	Hepatocytes
P3TLH_CCTTACGGTCCGAACC_1	20.6476	-15.4105	Hepatocytes
P3TLH_GTAACTGAGCAGACTG_1	-22.8601	-24.8094	Hepatocytes
P1TLH_CACATAGCAAAGTGCG_1	40.7396	65.209	T_NK
P2TLH_CTAACTTGTGCGATAG_1	-13.9464	29.6574	B_cells
P3TLH_CGAGAAGGTCCGTCAG_1	-6.56246	-35.2417	Hepatocytes
P3TLH_TGCCCATAGCGTTTAC_1	32.7757	-14.9249	Hepatocytes
P5TLH_TCTCATAGTTCACCTC_1	26.6378	37.574	T_NK
P3TLH_CGTCCATCAAGAAGAG_1	13.6933	-2.84163	Hepatocytes
P5TLH_TCCCGATTCACTATTC_1	27.9365	35.3527	T_NK
P3TLH_TGACTTTTCTGGCGAC_1	-29.3961	19.5392	Cholangiocytes
P5TLH_TGACGGCTCAGGATCT_1	33.4281	23.9309	T_NK
P5TLH_AGACGTTTCTTGCATT_1	-30.6796	63.123	Periportal_LSECs
P5TLH_CTGAAACGTGAACCTT_1	-67.4849	12.2872	Macrophage
P3TLH_TGTATTCGTATAGGGC_1	-15.1078	-3.71883	Hepatocytes
P3TLH_CATCCACAGCGATAGC_1	33.5324	-29.1885	Hepatocytes
P4TLH_TTGTAGGCAGATGAGC_1	34.6878	44.9173	T_NK
P5TLH_GTGCATAGTTATCCGA_1	-56.4445	-26.6422	Macrophage
P1TLH_CTACATTGTGTCAATC_1	78.5056	8.91914	T_NK
P2TLH_TTCGAAGTCTCGCTTG_1	-29.09	-69.7622	Hepatocytes
P4TLH_AAGGTTCTCAATACCG_1	-72.2533	6.18871	Macrophage
P3TLH_TGTGTTTGTGATAAGT_1	10.5875	-10.2397	Hepatocytes
P4TLH_TCTTCGGAGTGGGATC_1	18.6171	54.5578	T_NK
P5TLH_CCTCTGATCAAGGTAA_1	16.8249	23.7732	T_NK
P4TLH_GTGCTTCTCAACACCA_1	56.096	21.6653	T_NK
P5TLH_TCACGAAGTATTAGCC_1	-1.1995	68.2424	B_cells
P1TLH_CGTCTACGTAAAGGAG_1	32.3117	66.1624	T_NK
P5TLH_ATGAGGGGTTGGTTTG_1	26.1765	35.281	T_NK
P3TLH_CGGCTAGTCTCTGCTG_1	35.0906	-14.7475	Hepatocytes
P4TLH_AAGTCTGGTGGTTTCA_1	-61.5718	9.27424	Macrophage
P4TLH_GATCGCGCAGCATGAG_1	-60.4705	-7.04687	Macrophage
P2TLH_GAGCAGAAGGCAGGTT_1	-1.72516	27.1573	B_cells
P4TLH_GACGTTAAGGATGTAT_1	-57.1507	9.12415	Macrophage
P3TLH_CCTAGCTTCATCACCC_1	23.9768	-47.3381	Hepatocytes
P3TLH_GCACTCTAGGCGACAT_1	23.952	-60.2386	Hepatocytes
P3TLH_CAACCAATCAGGCGAA_1	8.1062	-7.83555	Hepatocytes
P2TLH_TTGGCAATCACGGTTA_1	-20.9048	-68.881	Hepatocytes
P5TLH_GACACGCAGTTTGCGT_1	-48.8645	-13.0868	Macrophage
P5TLH_ACTATCTAGCCGTCGT_1	34.3331	22.6515	T_NK
P4TLH_TGTGTTTAGATTACCC_1	-62.5295	11.6112	Macrophage
P3TLH_TCGTAGACACAGCCCA_1	20.2571	-20.5555	Hepatocytes
P2TLH_TGGGCGTGTGATGATA_1	-45.5451	11.73	Macrophage
P5TLH_TCAGCAAGTCGCTTCT_1	22.4626	32.7361	T_NK
P5TLH_ACCGTAATCCTCGCAT_1	55.708	11.5755	T_NK
P4TLH_TGCCCATGTGTTGAGG_1	-77.5108	6.43816	Macrophage
P3TLH_CCGTACTGTCAGTGGA_1	9.27092	-43.782	Hepatocytes
P5TLH_TCGGTAAAGTGGGCTA_1	69.1357	-9.05616	T_NK
P2TLH_GTTTCTACAGGCTCAC_1	-2.67984	31.5085	B_cells
P5TLH_TGCCCATAGGTAGCCA_1	46.2618	12.0683	T_NK
P2TLH_ACTGCTCTCGAATCCA_1	-29.6849	-51.5144	Hepatocytes
P2TLH_CAGATCAGTTTGTTGG_1	-32.907	-52.3929	Hepatocytes
P5TLH_GCATGCGGTCAACTGT_1	68.5636	-7.87351	T_NK
P5TLH_CTAAGACCACAGACAG_1	-48.9278	7.58716	T_NK
P4TLH_GAGTCCGGTCCGAATT_1	71.9739	26.8638	T_NK
P4TLH_GGAATAACAAGTAATG_1	65.3366	21.3294	T_NK
P5TLH_TGCGTGGAGATATGGT_1	33.801	23.2112	T_NK
P3TLH_GCGACCATCTATCCCG_1	28.7077	-45.0255	Hepatocytes
P3TLH_GTGAAGGCAGGAATCG_1	6.29481	-8.98751	Hepatocytes
P5TLH_GTTAAGCAGAGTAAGG_1	17.9878	23.5403	T_NK
P2TLH_CCTTCCCTCTTGACGA_1	-32.7443	-62.0001	Hepatocytes
P3TLH_AGCTCCTGTTTGTGTG_1	30.7972	-16.5347	Hepatocytes
P2TLH_TCTGAGATCTTGGGTA_1	-14.7653	34.9424	B_cells
P2TLH_CCTCTGAAGCTCCTCT_1	-68.0922	-4.5669	Macrophage
P3TLH_TGCACCTCAACGATGG_1	29.1951	-2.53665	Hepatocytes
P2TLH_TGCGCAGGTACCTACA_1	-8.53934	21.8266	B_cells
P2TLH_CGGACGTTCATCGCTC_1	-10.5718	26.4513	B_cells
P1TLH_ATTTCTGGTACGCTGC_1	-46.0138	43.9843	Central_venous_LSECs
P3TLH_GTAACTGTCATCTGCC_1	36.0284	-51.3057	Hepatocytes
P4TLH_ATAAGAGAGAAAGTGG_1	50.5446	23.0842	T_NK
P3TLH_GTTAAGCGTGTGGCTC_1	22.7887	-54.9918	Hepatocytes
P3TLH_GGACATTGTCTCGTTC_1	14.9268	-42.5899	Hepatocytes
P3TLH_ATCCACCTCAGTGCAT_1	-75.7581	-5.25531	Macrophage
P4TLH_CAGTCCTTCCGCATAA_1	-11.3602	36.2744	B_cells
P3TLH_CCGTACTTCATGCATG_1	13.7331	-1.9435	Hepatocytes
P2TLH_AGGCCACTCGCATGGC_1	-6.50641	31.9386	B_cells
P1TLH_GTCACGGTCACCATAG_1	29.0146	62.5985	T_NK
P5TLH_GAAGCAGGTGGCAAAC_1	-29.8574	15.6544	Cholangiocytes
P3TLH_ACCGTAATCCTGCTTG_1	39.1953	-13.7536	Hepatocytes
P4TLH_ACACCGGGTACTTGAC_1	-15.1231	0.992902	Hepatocytes
P1TLH_CCACCTATCATCTGTT_1	-25.6066	57.9469	Periportal_LSECs
P3TLH_CTCATTATCTTATCTG_1	10.3787	-45.54	Hepatocytes
P3TLH_CGAGCACGTCTAGCCG_1	3.45548	-46.4781	Hepatocytes
P5TLH_TCCCGATGTCTTCGTC_1	9.59933	-73.4676	Hepatocytes
P5TLH_TCTCTAATCATACGGT_1	-0.124603	70.2916	B_cells
P3TLH_CGATGGCCATTTGCCC_1	3.60036	-41.1778	Hepatocytes
P4TLH_CGGACACTCCTTTCGG_1	-65.8652	-19.0011	Macrophage
P1TLH_GCATGCGTCACCACCT_1	-43.7902	43.7564	Central_venous_LSECs
P3TLH_TGGCTGGTCCCTGACT_1	-77.222	-4.94912	Macrophage
P3TLH_TCACAAGGTATATGGA_1	-13.7549	-24.3108	Hepatocytes
P3TLH_CCACCTAAGAGCTGGT_1	-4.46777	42.0027	B_cells
P3TLH_TGACAACTCGAGAGCA_1	39.6496	-15.2328	Hepatocytes
P3TLH_CACCACTTCGTAGATC_1	5.24468	-26.6983	Hepatocytes
P4TLH_CACATAGAGTAGCCGA_1	70.3184	19.0366	T_NK
P1TLH_CGGACACAGATACACA_1	-48.5592	16.5854	Macrophage
P3TLH_ATGAGGGAGGGATACC_1	-71.5575	-9.32422	Macrophage
P2TLH_AGAGCTTGTTTGCATG_1	-44.2762	-56.3432	Hepatocytes
P1TLH_GTGTGCGTCTATGTGG_1	-59.3614	-25.3042	Macrophage
P1TLH_GGGATGAGTCGAAAGC_1	27.8813	67.6428	T_NK
P4TLH_GGGAGATCAGGCTCAC_1	-11.2612	38.5712	B_cells
P3TLH_GGCCGATTCGACCAGC_1	29.2356	-56.9817	Hepatocytes
P2TLH_TGACGGCGTCTCGTTC_1	-25.6329	-51.649	Hepatocytes
P5TLH_ACACCGGTCACTTCAT_1	32.5561	32.5707	T_NK
P4TLH_AAAGATGTCTACCTGC_1	72.3995	23.4906	T_NK
P2TLH_GACTACATCTCATTCA_1	-15.5928	27.4115	B_cells
P3TLH_CCTTTCTTCTGTTTGT_1	7.4046	-27.3057	Hepatocytes
P4TLH_CACCAGGGTGAGGGTT_1	71.4672	24.096	T_NK
P3TLH_GATCGATCAGTCAGCC_1	32.0226	-50.9123	Hepatocytes
P3TLH_ATTGGTGCAATGAATG_1	-11.1993	-19.1332	Hepatocytes
P5TLH_TTTATGCAGTACGCGA_1	50.8157	12.1581	T_NK
P4TLH_ATAAGAGTCGTTGCCT_1	-26.8085	69.6943	Periportal_LSECs
P5TLH_CGTGAGCCAGACACTT_1	0.0299415	69.7454	B_cells
P1TLH_CACAAACCAATTGCTG_1	38.7114	54.8573	T_NK
P2TLH_CCTCTGAGTCCAGTGC_1	-32.3816	-64.8311	Hepatocytes
P3TLH_GGCCGATGTACAAGTA_1	41.4223	-15.1515	Hepatocytes
P3TLH_TGAGAGGGTGAAATCA_1	41.4813	-24.608	Hepatocytes
P3TLH_CCTACACAGTATGACA_1	-11.5577	-26.6791	Hepatocytes
P4TLH_GCATGCGCAGCCAATT_1	72.0261	27.3674	T_NK
P4TLH_TGGTTAGTCCGCGGTA_1	68.0208	30.3862	T_NK
P4TLH_GAACGGAGTTGAGTTC_1	-3.18407	41.9695	B_cells
P2TLH_GTTTCTAGTAGCGTCC_1	-24.9385	-71.2089	Hepatocytes
P1TLH_GTTAAGCTCTCAACTT_1	44.3777	62.3057	T_NK
P3TLH_GATGAGGGTCACACGC_1	26.8784	-55.8762	Hepatocytes
P3TLH_CGATTGATCGGCCGAT_1	6.83254	-24.597	Hepatocytes
P5TLH_TTGACTTTCTAACCGA_1	27.2498	38.0422	T_NK
P4TLH_CTTTGCGTCAGGTTCA_1	14.9964	48.8251	T_NK
P1TLH_CTTTGCGGTTATGTGC_1	40.2349	66.1381	T_NK
P4TLH_TACGGATTCTGCGTAA_1	-37.1667	43.9757	Central_venous_LSECs
P1TLH_ACTGAGTCAAGCGAGT_1	-43.4256	6.36332	Macrophage
P3TLH_CAGCTAAAGTACGTAA_1	-14.3891	-23.3936	Hepatocytes
P1TLH_TTGGAACAGCAGATCG_1	-49.0566	2.03576	Macrophage
P4TLH_AGCGGTCGTTCTGAAC_1	4.40454	67.3685	B_cells
P3TLH_CTTAGGACACCGATAT_1	21.8892	-48.636	Hepatocytes
P3TLH_AATCCAGCATGCGCAC_1	-11.501	-18.0773	Hepatocytes
P3TLH_ACACCCTGTCGCGGTT_1	-26.5122	19.6421	Cholangiocytes
P3TLH_CAGCTAAAGGGTCGAT_1	8.44755	-31.6133	Hepatocytes
P4TLH_GCTCCTAAGCCTCGTG_1	27.5247	46.1662	T_NK
P1TLH_CGTCCATTCACATACG_1	27.421	67.57	T_NK
P2TLH_CTAAGACGTCTCATCC_1	-34.7097	-51.4085	Hepatocytes
P3TLH_CGGCTAGTCAATCACG_1	-67.7529	11.7641	Macrophage
P2TLH_CTGGTCTGTAAAGGAG_1	-37.6362	-56.3864	Hepatocytes
P5TLH_CAGCTAAGTTCGCTAA_1	-59.1535	15.615	Macrophage
P3TLH_GACACGCAGCTGCCCA_1	33.1466	-50.1817	Hepatocytes
P5TLH_GACTAACGTCGAAAGC_1	0.979717	62.7964	B_cells
P3TLH_GCGCAACAGGTACTCT_1	13.5506	-42.4355	Hepatocytes
P4TLH_GGAACTTCAGGCAGTA_1	50.6049	23.0742	T_NK
P2TLH_GTCACGGAGCTCAACT_1	-37.4011	-62.081	Hepatocytes
P5TLH_GTCGTAAAGTTTCCTT_1	26.3429	23.2321	T_NK
P3TLH_GATCGATGTCATGCAT_1	20.1602	-59.2711	Hepatocytes
P3TLH_ACGGCCATCCACGTGG_1	-73.4088	-7.97219	Macrophage
P2TLH_ACGCCAGTCGCCATAA_1	-25.2704	-55.0272	Hepatocytes
P4TLH_AACTCAGGTGGGTCAA_1	-28.01	71.8993	Periportal_LSECs
P4TLH_TGACAACCACATGGGA_1	-59.3585	10.8195	Macrophage
P3TLH_GATCTAGCATCTCGCT_1	26.1846	-18.2471	Hepatocytes
P4TLH_TAAGCGTTCTCGTATT_1	68.5037	27.1965	T_NK
P2TLH_CGTAGCGAGAATGTGT_1	-44.042	-57.347	Hepatocytes
P5TLH_CAGAGAGCATGCATGT_1	30.1254	21.8616	T_NK
P3TLH_ACTGAGTAGGCTCTTA_1	23.8767	-44.3363	Hepatocytes
P4TLH_TTGAACGAGCTAGTTC_1	21.0558	49.1179	T_NK
P1TLH_AGAGCTTAGGAGTAGA_1	-33.7744	46.0357	Central_venous_LSECs
P3TLH_CTGCGGAGTTCCACGG_1	19.1843	-29.257	Hepatocytes
P5TLH_TGCGTGGGTTTGTTGG_1	47.8188	15.1451	T_NK
P5TLH_GAAACTCGTACCAGTT_1	-31.0119	16.4785	Cholangiocytes
P5TLH_TTAGTTCTCAATCTCT_1	-54.2542	16.1637	Macrophage
P3TLH_TACGGTAAGGTACTCT_1	-14.7861	-30.8037	Hepatocytes
P3TLH_TGCCCTATCACCGGGT_1	34.4501	-54.1136	Hepatocytes
P3TLH_GGAACTTAGTGGTCCC_1	2.28016	-6.99494	Hepatocytes
P2TLH_CGATGGCTCTCCGGTT_1	-34.1986	-64.0037	Hepatocytes
P2TLH_TAAACCGTCTAACGGT_1	-42.3836	-59.9215	Hepatocytes
P1TLH_TTTGTCATCCTTGACC_1	-57.8132	-25.7202	Macrophage
P5TLH_GCATACATCTGGCGAC_1	-26.993	62.7707	Periportal_LSECs
P5TLH_CGAGCCATCTGAAAGA_1	-3.33128	36.6502	B_cells
P4TLH_CCTAGCTCATTCCTCG_1	50.2189	23.1926	T_NK
P3TLH_ATCACGACAATCGGTT_1	-3.44999	-25.9356	Hepatocytes
P1TLH_CTTCTCTAGCCAGGAT_1	35.1024	59.6402	T_NK
P1TLH_GCAGTTACAATCAGAA_1	75.9951	21.7386	T_NK
P5TLH_TGGCTGGCACCTGGTG_1	55.9153	8.32733	T_NK
P1TLH_TGTGTTTGTGAAATCA_1	-49.2906	46.9456	Central_venous_LSECs
P2TLH_ACGCCAGTCGATGAGG_1	-29.022	-63.0248	Hepatocytes
P3TLH_CTGATCCTCATACGGT_1	-17.8956	-21.6221	Hepatocytes
P1TLH_TTAGGACAGTGCCATT_1	76.5677	14.5966	T_NK
P2TLH_TTCTCAAAGGCTAGAC_1	-27.2868	-53.0286	Hepatocytes
P5TLH_ACGGAGATCATTGCCC_1	53.6668	13.0968	T_NK
P3TLH_ACGGAGAAGATAGGAG_1	29.3632	-26.7683	Hepatocytes
P3TLH_TGCCCTAAGGACACCA_1	-6.67951	-14.0261	Hepatocytes
P3TLH_TACTCGCGTTATCCGA_1	-1.82559	-42.3348	Hepatocytes
P2TLH_CCACTACAGTTGAGTA_1	-3.18941	35.3604	B_cells
P4TLH_GCAGCCACATTACGAC_1	32.2996	47.3455	T_NK
P4TLH_CATCCACGTGCACCAC_1	-67.3818	11.6783	Macrophage
P4TLH_TGCTACCTCAGGATCT_1	69.1757	25.2867	T_NK
P2TLH_ATTACTCTCTGGTATG_1	-68.1333	17.8304	Macrophage
P5TLH_CATGCCTTCGTCTGCT_1	29.8589	34.6186	T_NK
P4TLH_CTCGGGAGTCGCGTGT_1	40.4071	48.4733	T_NK
P1TLH_TGACTAGTCCTTAATC_1	37.7367	59.7896	T_NK
P1TLH_GTGCTTCCAGAAGCAC_1	40.1269	66.1471	T_NK
P3TLH_CCCAGTTTCAGCTGGC_1	34.0621	-3.30728	Hepatocytes
P3TLH_TCGGTAAGTCGGCATC_1	6.0016	-20.5283	Hepatocytes
P5TLH_GCGCCAACACACCGCA_1	22.1361	19.9319	T_NK
P3TLH_ACGATACAGTTAAGTG_1	-10.8962	-24.5313	Hepatocytes
P2TLH_ACGTCAAGTTCAGGCC_1	-39.2481	-56.0022	Hepatocytes
P5TLH_CTCCTAGTCAGTACGT_1	23.44	36.1025	T_NK
P5TLH_TGACTTTTCGGCTTGG_1	-57.3331	0.453325	Macrophage
P3TLH_CACCTTGAGAGTTGGC_1	22.7112	-58.5826	Hepatocytes
P1TLH_ATGTGTGTCATTATCC_1	-51.4703	18.9693	Macrophage
P3TLH_ACTATCTCACACCGCA_1	31.2518	-14.7494	Hepatocytes
P5TLH_CGAGCCATCCACGAAT_1	17.7595	54.7704	T_NK
P3TLH_AGCTCTCGTAGCACGA_1	9.47056	-31.6943	Hepatocytes
P5TLH_CAGCTAAAGTAGATGT_1	32.7582	37.3832	T_NK
P3TLH_TGAGAGGAGTGTACGG_1	19.6217	-18.8892	Hepatocytes
P5TLH_GCAAACTGTCTTGATG_1	61.4758	4.93366	T_NK
P1TLH_TGTGTTTTCTATCCCG_1	34.2653	65.9949	T_NK
P3TLH_CGTAGGCTCTAGCACA_1	-20.8363	-7.56844	Hepatocytes
P3TLH_CGGCTAGCAGTCACTA_1	29.9309	-1.58779	Hepatocytes
P2TLH_CAGCATAAGGATTCGG_1	-9.22006	23.6953	B_cells
P1TLH_CGGACGTGTGACTCAT_1	-43.4312	55.792	Central_venous_LSECs
P4TLH_AGGCCGTGTGTGACCC_1	61.6142	25.1302	T_NK
P1TLH_TGGGAAGAGACAGAGA_1	-51.1086	1.59828	Macrophage
P1TLH_TAAGAGAGTCGGCTCA_1	38.9607	40.765	T_NK
P5TLH_CGAGAAGAGATGTGTA_1	-50.6012	-17.7659	Macrophage
P4TLH_AACTTTCAGCTAACAA_1	56.666	26.681	T_NK
P4TLH_TCGGGACCAGCGATCC_1	-63.0075	-4.33455	Macrophage
P1TLH_GCCTCTACACACAGAG_1	-3.13402	-81.7854	Hepatocytes
P2TLH_ATCGAGTAGACTAGAT_1	-34.7664	64.3453	Periportal_LSECs
P4TLH_CATCGGGCACCAGATT_1	25.913	46.927	T_NK
P1TLH_GATGAAATCGGCCGAT_1	30.7435	61.2797	T_NK
P3TLH_ACACCGGGTGAGGGTT_1	-13.637	-19.925	Hepatocytes
P3TLH_AAATGCCAGTGCCAGA_1	27.7907	-56.0202	Hepatocytes
P1TLH_CACACAAAGGGCACTA_1	-45.0788	45.6571	Central_venous_LSECs
P3TLH_TTGCCGTTCCGAACGC_1	-24.6275	71.3403	Periportal_LSECs
P5TLH_ACTTTCACATACTCTT_1	63.4794	-0.285798	T_NK
P5TLH_CAGATCAAGAACAATC_1	-11.9188	0.208109	Hepatocytes
P4TLH_CGGACACTCCTACAGA_1	-25.4806	65.0631	Periportal_LSECs
P4TLH_TGCGTGGGTTCAGTAC_1	-73.3775	8.58236	Macrophage
P3TLH_AGGTCATGTAACGCGA_1	21.5887	-46.0831	Hepatocytes
P3TLH_CTCTACGAGCATGGCA_1	-8.76422	-35.1084	Hepatocytes
P5TLH_GAGGTGATCGTTGACA_1	-31.4387	23.6222	Periportal_LSECs
P3TLH_CCCTCCTAGCGATAGC_1	36.0213	-28.8233	Hepatocytes
P4TLH_CGTAGGCAGGCTAGAC_1	-11.0112	38.2835	B_cells
P1TLH_CACACTCTCCGAGCCA_1	-39.9132	38.7353	Central_venous_LSECs
P2TLH_AAGACCTTCGCGGATC_1	-30.8626	-60.0826	Hepatocytes
P2TLH_ACCCACTTCTTGCCGT_1	-34.6323	-59.9802	Hepatocytes
P4TLH_GTCACGGAGTAGATGT_1	-59.0494	-19.646	Macrophage
P2TLH_GAATGAACATCTCCCA_1	-28.3396	-49.5493	Hepatocytes
P3TLH_CCTTCCCAGCTAAACA_1	4.28844	-40.3806	Hepatocytes
P5TLH_CTTCTCTGTAGCGTCC_1	-14.4747	35.4925	B_cells
P3TLH_CACACAATCTACCTGC_1	-11.2674	-22.6941	Hepatocytes
P3TLH_ACGTCAAAGCTCAACT_1	36.4648	-36.3932	Hepatocytes
P4TLH_TACGGGCGTTGAGGTG_1	41.3337	46.2915	T_NK
P3TLH_AGTAGTCGTCTAGTGT_1	12.3904	-6.0635	Hepatocytes
P3TLH_CGTAGCGAGGTGCACA_1	27.6704	-27.7227	Hepatocytes
P4TLH_AAACGGGCATATGCTG_1	73.7058	30.5298	T_NK
P3TLH_GCACATACACCGAAAG_1	16.5024	-49.6432	Hepatocytes
P2TLH_GACGGCTCACACGCTG_1	-12.6147	29.5814	B_cells
P3TLH_AGAATAGGTGTTTGGT_1	38.1407	-35.2974	Hepatocytes
P3TLH_TAAACCGGTTACGCGC_1	35.4931	-20.7816	Hepatocytes
P2TLH_TACGGATAGGAGCGTT_1	-32.1817	56.9775	Periportal_LSECs
P1TLH_CTAGTGAAGACATAAC_1	-40.0752	43.521	Central_venous_LSECs
P1TLH_GGGATGAAGGCGACAT_1	76.3021	11.2309	T_NK
P3TLH_CGATGGCTCGGTGTCG_1	-16.6514	-23.7166	Hepatocytes
P4TLH_CTCAGAACAGTAGAGC_1	74.624	13.4891	T_NK
P2TLH_CTGCGGAAGTACGTAA_1	-32.5338	-57.5151	Hepatocytes
P4TLH_ACTATCTCACCGGAAA_1	20.1596	53.7261	T_NK
P3TLH_CATGACATCTCACATT_1	-3.22199	-14.54	Hepatocytes
P2TLH_AAGGCAGTCCTCAACC_1	-8.83554	23.5253	B_cells
P3TLH_GGTGCGTCAACACCCG_1	-0.521118	-13.8221	Hepatocytes
P2TLH_TCACAAGTCTTCATGT_1	-7.42532	31.1513	B_cells
P4TLH_GCAGCCACATACCATG_1	-29.871	50.4468	Periportal_LSECs
P5TLH_TCAGATGTCCAGGGCT_1	7.59331	-67.7365	Hepatocytes
P3TLH_GACACGCAGGGTATCG_1	10.9765	-22.6072	Hepatocytes
P3TLH_TCGCGTTAGGGATACC_1	8.96084	-45.7713	Hepatocytes
P3TLH_CACAGGCAGGAGTTTA_1	3.274	-7.13063	Hepatocytes
P3TLH_GAGGTGAAGACAGGCT_1	18.506	-33.8717	Hepatocytes
P3TLH_TGGTTAGTCACATAGC_1	26.1289	-5.71568	Hepatocytes
P3TLH_TCGCGTTGTCGCTTTC_1	-7.99215	-24.154	Hepatocytes
P4TLH_CGACTTCCATTCTCAT_1	-25.8194	55.3291	Periportal_LSECs
P2TLH_GCTGCTTTCTTTAGTC_1	-30.0935	-54.2911	Hepatocytes
P1TLH_CTCAGAAGTGTGACGA_1	-42.5471	39.0292	Central_venous_LSECs
P3TLH_CCAATCCCAAAGCGGT_1	22.7998	-44.9456	Hepatocytes
P3TLH_GCGAGAACACGTCTCT_1	9.56921	-28.3366	Hepatocytes
P3TLH_TTCTTAGGTACCTACA_1	-8.50166	-32.4336	Hepatocytes
P4TLH_GGAACTTGTTTGTTGG_1	-24.273	64.936	Periportal_LSECs
P3TLH_ACCCACTAGATGCCTT_1	-22.543	-6.57906	Hepatocytes
P3TLH_GACGTGCAGTTAAGTG_1	6.17033	-27.6372	Hepatocytes
P3TLH_GCAAACTTCAAAGTAG_1	31.5694	-48.9177	Hepatocytes
P3TLH_CTAGAGTCACGTGAGA_1	-10.2675	-18.2309	Hepatocytes
P1TLH_TTATGCTTCCAAGCCG_1	-47.515	-0.440526	Macrophage
P5TLH_ATTACTCTCTACTCAT_1	62.826	-1.39488	T_NK
P4TLH_CTCGTCACAATGGAGC_1	7.93315	-63.754	Hepatocytes
P3TLH_TTTCCTCCATCACGTA_1	14.7877	-37.4546	Hepatocytes
P5TLH_CTACCCAGTCAGATAA_1	0.617386	67.5313	B_cells
P5TLH_CATCAAGTCCAGATCA_1	50.1257	9.93632	T_NK
P4TLH_GGCGACTCAGAAGCAC_1	35.9723	49.673	T_NK
P3TLH_AGATTGCAGCTGCGAA_1	35.7196	-10.6766	Hepatocytes
P5TLH_CGTCTACAGCGCTCCA_1	-51.7031	-16.7729	Macrophage
P4TLH_TACCTTAGTCCTCTTG_1	-7.16487	40.7303	B_cells
P1TLH_CACACAAGTCACTTCC_1	-51.0184	-2.04044	Macrophage
P5TLH_GCCTCTAAGCTAGTGG_1	-29.775	15.8234	Cholangiocytes
P5TLH_ACTGAGTTCCTCATTA_1	41.4624	10.728	T_NK
P4TLH_TTGCCGTTCGTACGGC_1	69.9812	21.9556	T_NK
P1TLH_CAGTAACCAGATGAGC_1	-27.8405	16.9986	Cholangiocytes
P3TLH_ACACTGATCGCTTAGA_1	-3.42324	-34.5175	Hepatocytes
P2TLH_AGAATAGTCTCGCTTG_1	-31.1527	-51.8765	Hepatocytes
P3TLH_TGGCTGGCACACAGAG_1	-16.8323	-25.9877	Hepatocytes
P3TLH_GCTCCTAAGTTAACGA_1	-3.44269	-12.998	Hepatocytes
P1TLH_CTAAGACTCAGGTTCA_1	45.3102	63.5864	T_NK
P3TLH_AGATCTGCAGTCGTGC_1	-25.4961	14.8584	Cholangiocytes
P3TLH_CACACTCGTGTGCGTC_1	14.5169	-5.21201	Hepatocytes
P1TLH_TGAAAGAAGCGGCTTC_1	39.4148	67.9808	T_NK
P1TLH_GAAATGAAGTCCGTAT_1	79.0169	12.2985	T_NK
P2TLH_ACTGTCCCAATGTAAG_1	-40.7999	-57.7933	Hepatocytes
P1TLH_CTACATTAGGTGACCA_1	-53.085	23.8296	Macrophage
P1TLH_ACTTTCAAGACTGTAA_1	-50.5138	24.3759	Macrophage
P3TLH_GGACAAGCACGCTTTC_1	30.309	-56.3431	Hepatocytes
P3TLH_TCATTACAGGTGCTTT_1	-19.2521	-9.09719	Hepatocytes
P5TLH_TCTGAGATCCTGTAGA_1	-33.7598	46.0177	Central_venous_LSECs
P4TLH_AGCTCCTTCTGCGTAA_1	56.157	37.5273	T_NK
P2TLH_CATTCGCAGCTGTTCA_1	-14.4858	42.2366	B_cells
P3TLH_GCATGATCACAACGCC_1	-3.02823	35.2751	B_cells
P3TLH_CAGAGAGAGATCCCAT_1	7.67504	-24.4335	Hepatocytes
P3TLH_CGTCTACAGAGTGAGA_1	24.2828	-58.035	Hepatocytes
P2TLH_GCCTCTAGTCTCTTTA_1	-48.2026	-55.2095	Hepatocytes
P1TLH_GACGCGTAGTCCTCCT_1	-40.2075	39.1977	Central_venous_LSECs
P5TLH_ATCTACTTCACCTTAT_1	28.668	33.6788	T_NK
P4TLH_TTTGTCACACCAGCAC_1	27.9129	49.7361	T_NK
P1TLH_GCAGTTATCCCTCAGT_1	-50.1118	-0.190429	Macrophage
P4TLH_CAGCGACCACATGACT_1	-28.2055	70.0921	Periportal_LSECs
P3TLH_GTACTCCGTAGGAGTC_1	1.24251	-44.9465	Hepatocytes
P2TLH_CGGCTAGTCTCATTCA_1	2.36698	21.9908	B_cells
P2TLH_GTGCAGCGTGAGGCTA_1	-16.1282	28.7525	Central_venous_LSECs
P4TLH_CACATAGCACTTAAGC_1	59.853	25.6882	T_NK
P3TLH_GCGCCAATCAAACCGT_1	24.8123	-12.1417	Hepatocytes
P2TLH_AGGGTGACACCAGGCT_1	-48.6135	-53.4864	Hepatocytes
P4TLH_CACTCCAAGAATGTGT_1	25.2943	52.0423	T_NK
P5TLH_TGCCCATAGTGTACTC_1	31.0434	28.8588	T_NK
P1TLH_GGACAAGGTGATAAGT_1	-49.18	19.6379	Macrophage
P3TLH_GTTCTCGTCGCGATCG_1	19.2245	-1.95801	Hepatocytes
P3TLH_CAGCCGATCTCCAGGG_1	-63.5503	-16.0908	Macrophage
P4TLH_TATGCCCGTTTGTTTC_1	32.2042	45.0321	T_NK
P3TLH_GGTATTGCACATTTCT_1	-67.749	-3.63596	Macrophage
P4TLH_CGAGCCATCCTGTACC_1	60.924	38.577	T_NK
P3TLH_CTGATAGTCAGTTTGG_1	17.2319	-27.0547	Hepatocytes
P1TLH_CTGCCTAGTTCCTCCA_1	28.0876	64.7446	T_NK
P1TLH_GATGCTAGTATATGAG_1	38.6466	58.324	T_NK
P3TLH_GGACAAGGTTGGTAAA_1	-5.0522	-13.5684	Hepatocytes
P5TLH_CCTCTGAGTCCATCCT_1	35.0854	37.9498	T_NK
P2TLH_GATGAAACACACATGT_1	-28.1564	-65.9839	Hepatocytes
P3TLH_CTAGCCTTCGGCCGAT_1	-70.066	-1.89199	Macrophage
P1TLH_CCTTACGCATGCATGT_1	-61.3514	-25.9655	Macrophage
P1TLH_CTGTGCTTCTTAGCCC_1	37.1849	66.0305	T_NK
P3TLH_TGAAAGACAGCCTGTG_1	14.69	-30.023	Hepatocytes
P4TLH_ACTGTCCGTCCTCTTG_1	41.1748	49.7076	T_NK
P2TLH_ATTGGTGGTGACGGTA_1	-68.4154	16.2051	Macrophage
P3TLH_TGGGCGTAGGCTCATT_1	-10.0341	-11.7588	Hepatocytes
P3TLH_GATCTAGGTTATCCGA_1	-12.0605	-34.5525	Hepatocytes
P2TLH_CCTCAGTAGGGAGTAA_1	-42.3806	-48.0837	Hepatocytes
P3TLH_CATTCGCTCGTAGGAG_1	23.8735	-54.1069	Hepatocytes
P3TLH_GCATGCGCAGCCTTGG_1	32.4991	-32.2411	Hepatocytes
P3TLH_CGTGTAACAACAACCT_1	12.3093	-8.85774	Hepatocytes
P2TLH_CGATCGGAGACCGGAT_1	-26.7428	-50.2988	Hepatocytes
P5TLH_GGAATAAAGGCCGAAT_1	29.648	23.4739	T_NK
P3TLH_ATGGGAGAGTTCGCAT_1	4.77887	-44.4192	Hepatocytes
P3TLH_GTCTCGTTCAGATAAG_1	18.8581	-29.5351	Hepatocytes
P4TLH_TACTCATCATCTACGA_1	-60.6699	-7.35008	Macrophage
P3TLH_ACTATCTCAAGCTGAG_1	-19.7218	-21.3283	Hepatocytes
P3TLH_TCAACGATCAGTACGT_1	8.08343	-8.5626	Hepatocytes
P4TLH_AAGGAGCAGCGTAATA_1	23.2253	49.5556	T_NK
P5TLH_CTCTGGTTCAAGAAGT_1	-57.7024	16.6197	Macrophage
P3TLH_GAACATCCATTGGGCC_1	28.3789	-54.1422	Hepatocytes
P2TLH_AAGTCTGCAAGCCATT_1	-23.0634	-57.6345	Hepatocytes
P3TLH_AGCTCTCAGGCCCTTG_1	22.3456	-47.3258	Hepatocytes
P3TLH_CCTTCGATCTAACTTC_1	12.5265	-41.1871	Hepatocytes
P3TLH_TCGCGAGCACACCGCA_1	31.191	-49.4025	Hepatocytes
P2TLH_AGTCTTTCAAGCGATG_1	-3.2627	26.7512	B_cells
P3TLH_CGAGCCACATGTAAGA_1	15.5222	-26.6945	Hepatocytes
P4TLH_ACTGAACGTGTGACGA_1	60.3992	24.4515	T_NK
P3TLH_AAAGTAGCATTTCAGG_1	-2.34961	-13.0029	Hepatocytes
P5TLH_GCTCCTACACGAAACG_1	30.3348	21.0045	T_NK
P3TLH_GTGGGTCTCGGTCCGA_1	15.0232	-20.9	Hepatocytes
P3TLH_GCACATATCCCAAGAT_1	1.84558	-26.1029	Hepatocytes
P3TLH_GACTAACAGATGGGTC_1	10.1578	-11.4306	Hepatocytes
P5TLH_TGGCTGGAGAGCTATA_1	-51.8609	-11.8596	Macrophage
P3TLH_CTGTTTACAAAGGAAG_1	-67.7848	-2.93093	Macrophage
P5TLH_CGCGGTAAGAAACGCC_1	-29.357	58.3546	Periportal_LSECs
P4TLH_ACCCACTCAAGGGTCA_1	19.2304	48.8589	T_NK
P5TLH_ATTATCCGTTGATTGC_1	49.6566	12.0534	T_NK
P2TLH_ACAGCCGTCTTGTTTG_1	-28.1103	-66.717	Hepatocytes
P2TLH_TTTCCTCCAGCGTCCA_1	-32.2518	-62.2708	Hepatocytes
P1TLH_CAGAATCTCCGCTGTT_1	-60.0541	-25.2576	Macrophage
P1TLH_GTTTCTATCAGCGACC_1	40.9478	63.9513	T_NK
P4TLH_CGGGTCACAAACGCGA_1	8.04108	-63.8347	Hepatocytes
P3TLH_AGGCCACAGCAATCTC_1	24.5848	-47.3315	Hepatocytes
P3TLH_CATCCACAGCTAGTGG_1	19.0633	-9.96668	Hepatocytes
P3TLH_TCTCATAGTATTCTCT_1	31.7856	-50.0837	Hepatocytes
P4TLH_CGCGGTACATTCCTGC_1	21.3273	48.7548	T_NK
P5TLH_ATTTCTGGTTCCTCCA_1	24.1907	22.0289	T_NK
P3TLH_CCTTCCCAGGAATTAC_1	3.2884	-32.7255	Hepatocytes
P5TLH_GTAACTGAGTGTCCCG_1	-0.0273501	68.1381	B_cells
P3TLH_GCGCAGTGTTGGAGGT_1	-74.8588	-3.14779	Macrophage
P5TLH_AAACCTGAGTACGTTC_1	66.7071	5.7304	T_NK
P3TLH_GGACATTTCGGCTTGG_1	-25.4628	70.912	Periportal_LSECs
P2TLH_CTCTACGCATATGCTG_1	-34.7744	-62.4258	Hepatocytes
[truncated: 6,105 more rows]

## Sheet: drop-seq pancreas
tSNE result of drop-seq pancreas dataset
	TSNE1	TSNE2	cluster
human3_lib2.final_cell_0210	65.199	11.5808	beta
human2_lib3.final_cell_0322	9.77779	41.0803	beta
human1_lib2.final_cell_0572	-26.6438	-57.527	ductal
human3_lib4.final_cell_0152	-34.4065	-5.77374	alpha
human2_lib2.final_cell_0142	24.7938	-9.69827	beta
human1_lib3.final_cell_0118	-22.0025	-64.2592	ductal
human1_lib1.final_cell_0228	4.36046	9.93664	beta
human4_lib1.final_cell_0040	-7.01962	-69.7225	ductal
human2_lib1.final_cell_0519	-12.1833	31.5395	alpha
human3_lib3.final_cell_0007	45.9531	-53.4422	acinar
human1_lib3.final_cell_0509	4.28367	6.56025	beta
human1_lib2.final_cell_0067	29.9118	-37.0507	acinar
human3_lib1.final_cell_0433	-35.0752	-44.8783	ductal
human3_lib4.final_cell_0757	-34.2769	-51.8802	ductal
human1_lib2.final_cell_0180	16.0303	15.8164	beta
human4_lib3.final_cell_0647	-39.1346	51.3957	alpha
human2_lib2.final_cell_0557	-6.76048	40.0542	alpha
human1_lib1.final_cell_0192	7.54336	62.708	delta
human3_lib1.final_cell_0205	-33.8902	13.8818	alpha
human2_lib2.final_cell_0437	-20.9049	29.1389	alpha
human1_lib3.final_cell_0225	7.04712	19.2242	beta
human1_lib3.final_cell_0265	6.44982	11.4545	beta
human1_lib1.final_cell_0531	10.8503	4.33969	beta
human4_lib1.final_cell_0240	-80.1823	15.4326	gamma
human3_lib4.final_cell_0086	40.7385	-45.1488	acinar
human4_lib3.final_cell_0692	-0.451962	-15.8979	beta
human3_lib1.final_cell_0731	-43.7936	-15.5926	alpha
human3_lib2.final_cell_0197	-33.4968	-0.059067	alpha
human1_lib3.final_cell_0264	6.37216	65.7896	delta
human3_lib1.final_cell_0257	61.7131	7.49077	beta
human2_lib1.final_cell_0023	-23.2115	37.8831	alpha
human1_lib1.final_cell_0292	25.9314	19.5695	beta
human3_lib1.final_cell_0208	56.3277	17.4344	beta
human3_lib4.final_cell_0491	-36.1541	-57.2953	ductal
human3_lib4.final_cell_0663	56.5382	16.9603	beta
human1_lib3.final_cell_0156	34.686	-33.3574	acinar
human4_lib1.final_cell_0127	17.4788	-55.8103	ductal
human3_lib1.final_cell_0615	-34.4551	-40.9085	ductal
human3_lib1.final_cell_0772	-32.6312	-51.7854	ductal
human3_lib2.final_cell_0064	46.8001	-44.2145	acinar
human2_lib2.final_cell_0291	-10.9882	28.6144	alpha
human3_lib2.final_cell_0012	40.8107	-56.6487	acinar
human3_lib2.final_cell_0439	53.0171	15.5124	beta
human3_lib3.final_cell_0206	58.2528	6.37149	beta
human3_lib2.final_cell_0179	-73.265	1.80957	gamma
human3_lib3.final_cell_0799	-52.4401	-17.836	alpha
human2_lib2.final_cell_0395	-8.3416	41.6982	alpha
human3_lib1.final_cell_0007	34.7666	-52.5248	acinar
human1_lib3.final_cell_0327	-20.7585	-64.2488	ductal
human3_lib4.final_cell_0111	44.7162	-40.4535	acinar
human2_lib2.final_cell_0506	-10.1258	30.8177	alpha
human3_lib3.final_cell_0438	50.4658	42.3832	endothelial
human1_lib1.final_cell_0049	6.74385	58.8123	delta
human2_lib3.final_cell_0284	20.6048	-17.181	beta
human4_lib1.final_cell_0171	-46.931	48.5056	alpha
human1_lib1.final_cell_0322	-48.9686	38.2269	alpha
human2_lib1.final_cell_0137	11.9056	-17.2452	beta
human3_lib4.final_cell_0052	-30.5957	-39.853	ductal
human3_lib1.final_cell_0301	23.1684	57.0647	delta
human4_lib3.final_cell_0560	-47.1419	52.788	alpha
human3_lib2.final_cell_0030	56.1521	14.3203	beta
human3_lib3.final_cell_0125	-37.2577	-2.0393	alpha
human3_lib4.final_cell_0585	52.6362	1.80041	beta
human2_lib2.final_cell_0535	-11.4056	34.5067	alpha
human4_lib1.final_cell_0516	-5.83619	-26.1107	beta
human3_lib3.final_cell_0083	-24.3835	-41.8528	ductal
human2_lib2.final_cell_0008	-23.1905	31.3459	alpha
human3_lib2.final_cell_0359	50.4125	-35.3243	acinar
human4_lib1.final_cell_0382	-11.8543	-16.3692	beta
human4_lib1.final_cell_0260	-11.2977	-65.5376	ductal
human2_lib3.final_cell_0419	-83.5921	5.53545	gamma
human3_lib4.final_cell_0611	44.6422	-33.8018	acinar
human3_lib4.final_cell_0603	50.0395	42.3822	endothelial
human3_lib1.final_cell_0736	-23.7912	-45.7071	ductal
human1_lib2.final_cell_0273	3.17997	58.8762	delta
human2_lib1.final_cell_0463	17.0459	-17.9208	beta
human3_lib3.final_cell_0131	53.5076	12.2901	beta
human2_lib1.final_cell_0295	-83.5045	4.38092	gamma
human3_lib4.final_cell_0225	56.7693	5.64108	beta
human1_lib2.final_cell_0100	14.0475	12.7034	beta
human4_lib3.final_cell_0622	-81.4672	13.063	gamma
human1_lib3.final_cell_0184	-25.4454	-62.2052	ductal
human3_lib2.final_cell_0164	53.102	-45.2137	acinar
human3_lib1.final_cell_0385	42.4871	-42.0542	acinar
human4_lib3.final_cell_0167	-8.76956	-67.3901	ductal
human2_lib3.final_cell_0557	26.1567	-4.63906	beta
human4_lib3.final_cell_0614	-47.0516	45.9143	alpha
human1_lib3.final_cell_0273	-56.0391	35.2144	alpha
human2_lib1.final_cell_0102	-85.9432	3.87142	gamma
human3_lib4.final_cell_0826	-40.0686	-51.5461	ductal
human2_lib3.final_cell_0267	-17.2375	41.5379	alpha
human1_lib3.final_cell_0020	31.3232	-37.4339	acinar
human2_lib1.final_cell_0136	-8.31039	-50.7296	ductal
human3_lib2.final_cell_0077	64.0469	11.0998	beta
human2_lib2.final_cell_0109	22.1325	69.7826	delta
human3_lib2.final_cell_0385	-54.5864	-3.14799	alpha
human2_lib3.final_cell_0045	-27.9433	38.3026	alpha
human3_lib1.final_cell_0024	59.2866	-34.3178	acinar
human3_lib4.final_cell_0773	42.5433	-31.9829	acinar
human2_lib2.final_cell_0115	-16.4521	50.9891	alpha
human2_lib1.final_cell_0038	11.0941	-53.407	ductal
human2_lib3.final_cell_0437	19.5589	-17.7451	beta
human3_lib2.final_cell_0181	-27.2071	-14.2845	alpha
human1_lib3.final_cell_0552	55.4729	48.2191	endothelial
human1_lib1.final_cell_0134	33.9623	-33.5413	acinar
human3_lib4.final_cell_0685	45.4194	-31.1177	acinar
human3_lib1.final_cell_0528	64.632	11.1331	beta
human1_lib3.final_cell_0042	4.01842	64.9875	delta
human3_lib3.final_cell_0109	38.6812	-56.6702	acinar
human3_lib4.final_cell_0759	-32.4188	4.66638	alpha
human3_lib2.final_cell_0541	-44.1687	5.74096	alpha
human2_lib1.final_cell_0096	-83.8515	5.64361	gamma
human1_lib3.final_cell_0257	7.61297	63.9529	delta
human3_lib2.final_cell_0026	39.3846	-54.7539	acinar
human3_lib2.final_cell_0617	-47.8086	1.07548	alpha
human1_lib3.final_cell_0203	-58.1099	29.2965	alpha
human3_lib4.final_cell_0386	58.324	13.2586	beta
human3_lib1.final_cell_0476	34.4708	-52.611	acinar
human3_lib2.final_cell_0147	-46.0356	-4.41045	alpha
human2_lib1.final_cell_0095	19.6111	68.657	delta
human1_lib3.final_cell_0202	31.1154	28.489	beta
human2_lib1.final_cell_0467	-18.0939	-48.944	ductal
human3_lib1.final_cell_0429	-33.2416	-7.26007	alpha
human1_lib1.final_cell_0125	12.4695	21.7978	beta
human3_lib3.final_cell_0823	-36.5318	-54.0227	ductal
human2_lib1.final_cell_0459	-14.854	26.5853	alpha
human2_lib1.final_cell_0075	-15.4	37.4796	alpha
human4_lib1.final_cell_0282	-2.83999	-22.8594	beta
human2_lib2.final_cell_0036	11.2488	-51.4581	ductal
human4_lib1.final_cell_0094	-47.0227	48.6125	alpha
human3_lib3.final_cell_0035	43.7658	-49.9778	acinar
human4_lib3.final_cell_0619	-4.04056	-11.9504	beta
human2_lib2.final_cell_0143	-13.0406	40.736	alpha
human3_lib3.final_cell_0496	-34.979	-44.2205	ductal
human3_lib2.final_cell_0682	-30.1732	-4.5845	alpha
human2_lib3.final_cell_0065	-14.0202	36.8185	alpha
human3_lib4.final_cell_0068	49.9456	-47.1485	acinar
human3_lib4.final_cell_0654	-32.6424	13.0097	alpha
human3_lib2.final_cell_0241	-26.5944	-34.8793	ductal
human1_lib2.final_cell_0409	-49.969	32.7291	alpha
human3_lib1.final_cell_0588	44.3503	-32.2705	acinar
human3_lib1.final_cell_0501	55.7164	37.3164	endothelial
human2_lib3.final_cell_0540	-19.0361	-57.1098	ductal
human3_lib2.final_cell_0025	52.0859	-49.8389	acinar
human3_lib2.final_cell_0510	-50.2118	-17.7786	alpha
human3_lib4.final_cell_0784	-39.635	-12.4014	alpha
human4_lib3.final_cell_0008	17.9295	-55.9167	ductal
human2_lib2.final_cell_0016	9.55274	-60.0169	ductal
human1_lib1.final_cell_0186	3.28404	8.81714	beta
human1_lib2.final_cell_0276	2.90345	59.9078	delta
human3_lib3.final_cell_0542	47.7809	13.3505	beta
human3_lib1.final_cell_0320	51.1501	45.9089	endothelial
human2_lib2.final_cell_0050	-4.12164	-56.0278	ductal
human3_lib3.final_cell_0313	55.7572	-1.04759	beta
human4_lib3.final_cell_0125	16.4396	-52.5942	ductal
human3_lib4.final_cell_0870	-26.4896	3.8861	alpha
human4_lib3.final_cell_0153	-42.9645	57.128	alpha
human1_lib2.final_cell_0484	-34.002	-62.8939	ductal
human3_lib2.final_cell_0704	-23.0569	3.98559	alpha
human3_lib2.final_cell_0209	-32.3608	-52.8841	ductal
human3_lib1.final_cell_0420	-47.5846	-13.4447	alpha
human3_lib2.final_cell_0448	-42.157	-16.9464	alpha
human3_lib2.final_cell_0090	39.1668	-50.4274	acinar
human2_lib3.final_cell_0129	-17.9868	48.505	alpha
human3_lib3.final_cell_0280	-52.4419	-13.0427	alpha
human3_lib2.final_cell_0213	43.2888	-44.5368	acinar
human2_lib3.final_cell_0461	-13.8887	40.8266	alpha
human3_lib3.final_cell_0714	-34.5517	12.7095	alpha
human3_lib4.final_cell_0355	57.4347	-37.9471	acinar
human2_lib3.final_cell_0160	15.5073	-24.5169	beta
human3_lib3.final_cell_0151	46.6991	16.0963	beta
human3_lib4.final_cell_0612	-46.7458	-1.68009	alpha
human1_lib1.final_cell_0476	-76.577	9.66507	gamma
human3_lib2.final_cell_0565	-41.1932	7.05603	alpha
human3_lib2.final_cell_0465	46.5648	18.971	beta
human4_lib3.final_cell_0156	-2.54951	-29.4569	beta
human2_lib3.final_cell_0142	-18.9508	45.974	alpha
human3_lib2.final_cell_0072	44.3363	-41.0812	acinar
human1_lib2.final_cell_0030	32.5723	27.6705	beta
human3_lib4.final_cell_0848	-41.7513	-14.3166	alpha
human2_lib2.final_cell_0164	-13.9317	48.3848	alpha
human2_lib1.final_cell_0161	-1.91406	37.6409	alpha
human1_lib3.final_cell_0050	8.0815	64.4416	delta
human2_lib3.final_cell_0182	0.431263	36.6644	alpha
human1_lib3.final_cell_0191	-74.9157	12.1361	gamma
human3_lib1.final_cell_0352	-40.9746	3.39846	alpha
human3_lib4.final_cell_0506	60.6612	2.78794	beta
human3_lib1.final_cell_0601	-41.1773	-6.04497	alpha
human2_lib3.final_cell_0162	7.70804	-59.9998	ductal
human1_lib3.final_cell_0695	-75.6825	7.81325	gamma
human2_lib1.final_cell_0417	-21.6146	41.7839	alpha
human4_lib1.final_cell_0163	-3.90928	-26.2472	beta
human3_lib4.final_cell_0313	57.7586	18.6104	beta
human1_lib1.final_cell_0154	5.64313	64.473	delta
human3_lib2.final_cell_0194	22.7901	55.9758	delta
human4_lib3.final_cell_0395	-11.7885	-18.1475	beta
human1_lib3.final_cell_0565	1.89159	11.6194	beta
human2_lib1.final_cell_0526	-15.2326	30.0295	alpha
human1_lib1.final_cell_0276	5.32255	16.2115	beta
human4_lib3.final_cell_0203	-81.0529	16.3076	gamma
human1_lib1.final_cell_0144	19.152	18.5652	beta
human3_lib1.final_cell_0058	55.1717	-47.0059	acinar
human3_lib1.final_cell_0104	25.1009	59.5776	delta
human3_lib2.final_cell_0754	-28.6119	-46.839	ductal
human3_lib3.final_cell_0494	-42.135	9.41698	alpha
human4_lib3.final_cell_0213	-9.71256	-23.3824	beta
human3_lib4.final_cell_0299	57.8424	3.33665	beta
human3_lib4.final_cell_0345	57.5681	-44.49	acinar
human2_lib3.final_cell_0490	-8.05697	-60.5932	ductal
human2_lib3.final_cell_0236	-15.2918	25.9283	alpha
human2_lib1.final_cell_0207	-82.9783	4.78052	gamma
human3_lib1.final_cell_0773	-42.6531	-14.763	alpha
human4_lib3.final_cell_0070	3.609	73.0594	delta
human2_lib2.final_cell_0373	-9.8636	29.5863	alpha
human1_lib1.final_cell_0273	52.9573	51.3331	endothelial
human4_lib3.final_cell_0277	18.3379	-50.9696	ductal
human1_lib2.final_cell_0308	-49.5197	35.6852	alpha
human4_lib1.final_cell_0399	-13.9756	-69.5395	ductal
human2_lib3.final_cell_0070	-15.2267	40.2298	alpha
human4_lib3.final_cell_0500	-3.97935	-31.2236	beta
human2_lib1.final_cell_0153	-19.2894	41.2057	alpha
human3_lib3.final_cell_0344	-57.2614	-6.18134	alpha
human3_lib4.final_cell_0884	-47.1499	18.4009	alpha
human3_lib1.final_cell_0337	-57.7235	-7.00376	alpha
human2_lib1.final_cell_0521	-17.0952	26.6175	alpha
human3_lib1.final_cell_0120	44.8835	-39.9454	acinar
human3_lib1.final_cell_0620	-28.0864	-13.8967	alpha
human3_lib2.final_cell_0412	54.0022	10.3375	beta
human3_lib4.final_cell_0525	61.9651	9.35821	beta
human3_lib4.final_cell_0159	55.5637	4.72455	beta
human3_lib3.final_cell_0430	-46.7501	-0.607663	alpha
human4_lib3.final_cell_0648	-35.1784	52.8631	alpha
human3_lib1.final_cell_0004	40.4469	-51.7829	acinar
human3_lib1.final_cell_0068	-56.5219	-12.9572	alpha
human4_lib3.final_cell_0109	-35.5192	54.6081	alpha
human3_lib3.final_cell_0048	32.3947	-57.4694	acinar
human2_lib3.final_cell_0537	-20.5954	14.6018	alpha
human3_lib2.final_cell_0831	43.7211	-1.80094	beta
human1_lib3.final_cell_0237	5.3828	21.1476	beta
human3_lib3.final_cell_0902	23.9927	53.282	delta
human1_lib2.final_cell_0184	8.9136	61.1321	delta
human2_lib2.final_cell_0409	24.2447	-19.7651	beta
human4_lib1.final_cell_0573	-38.5252	59.555	alpha
human4_lib3.final_cell_0168	-14.3236	-16.6561	beta
human3_lib3.final_cell_0216	-47.5913	6.45364	alpha
human2_lib1.final_cell_0018	-15.7006	-53.1622	ductal
human1_lib2.final_cell_0441	-32.4988	-61.2426	ductal
human2_lib3.final_cell_0041	13.8521	69.0416	delta
human3_lib4.final_cell_0380	62.7282	5.88947	beta
human1_lib1.final_cell_0473	5.72604	5.83862	beta
human3_lib3.final_cell_0194	33.8453	-58.8166	acinar
human3_lib2.final_cell_0328	-33.7624	-4.01999	alpha
human3_lib2.final_cell_0264	21.9076	57.3142	delta
human2_lib2.final_cell_0353	58.7297	41.3399	endothelial
human3_lib4.final_cell_0858	38.2593	-0.459983	beta
human3_lib2.final_cell_0620	28.3092	-56.8878	acinar
human3_lib1.final_cell_0883	46.8703	4.0484	beta
human4_lib3.final_cell_0100	-13.075	-67.8843	ductal
human2_lib2.final_cell_0091	10.0186	42.2161	beta
human3_lib1.final_cell_0672	-33.1766	-39.8355	ductal
human1_lib1.final_cell_0440	-34.0064	-62.7944	ductal
human1_lib1.final_cell_0264	1.06389	10.2727	beta
human3_lib3.final_cell_0592	11.9797	42.904	beta
human1_lib3.final_cell_0564	6.17244	-0.346469	beta
human3_lib4.final_cell_0711	-47.5453	-2.33185	alpha
human1_lib2.final_cell_0326	-22.0575	-63.1892	ductal
human1_lib3.final_cell_0283	4.2706	5.33258	beta
human4_lib1.final_cell_0424	-42.1929	50.3571	alpha
human3_lib4.final_cell_0505	40.2079	-43.4814	acinar
human4_lib3.final_cell_0447	-3.36486	-21.5588	beta
human3_lib1.final_cell_0738	41.0792	0.36937	beta
human3_lib1.final_cell_0533	65.6235	10.8813	beta
human2_lib1.final_cell_0356	-12.7962	38.9655	alpha
human1_lib1.final_cell_0122	21.0241	20.0161	beta
human1_lib2.final_cell_0251	-22.0655	-63.0882	ductal
human3_lib4.final_cell_0553	-47.9501	-8.32692	alpha
human4_lib1.final_cell_0512	-0.0705874	-29.0004	beta
human3_lib4.final_cell_0148	44.764	-46.606	acinar
human1_lib3.final_cell_0711	56.1279	51.3428	endothelial
human3_lib4.final_cell_0794	59.0198	-40.8854	acinar
human3_lib4.final_cell_0008	41.0304	-57.0653	acinar
human4_lib1.final_cell_0124	-0.864068	-24.778	beta
human1_lib3.final_cell_0261	8.37885	8.82102	beta
human3_lib1.final_cell_0619	47.4262	-33.4736	acinar
human3_lib3.final_cell_0829	26.6408	54.886	delta
human3_lib4.final_cell_0140	62.892	4.79296	beta
human4_lib3.final_cell_0368	-8.89631	-14.0344	beta
human1_lib1.final_cell_0497	36.6266	15.1707	beta
human3_lib1.final_cell_0418	-47.4658	-10.8622	alpha
human3_lib3.final_cell_0808	47.8933	-2.57631	beta
human1_lib2.final_cell_0168	8.54571	12.6169	beta
human3_lib4.final_cell_0275	62.3259	12.2001	beta
human4_lib3.final_cell_0684	-1.54185	-14.9783	beta
human3_lib3.final_cell_0161	60.281	11.4256	beta
human2_lib1.final_cell_0262	18.1394	-22.2876	beta
human4_lib3.final_cell_0554	-11.9374	-21.3498	beta
human3_lib3.final_cell_0763	-42.9193	8.82945	alpha
human3_lib3.final_cell_0642	42.3144	-33.5716	acinar
human3_lib3.final_cell_0383	46.0935	-4.19406	beta
human1_lib2.final_cell_0245	-50.2805	31.698	alpha
human3_lib3.final_cell_0424	-43.788	6.05258	alpha
human1_lib3.final_cell_0579	5.15333	3.72841	beta
human1_lib1.final_cell_0147	23.2485	25.5483	beta
human3_lib1.final_cell_0514	-48.1271	13.7767	alpha
human1_lib1.final_cell_0207	-20.1033	-63.6915	ductal
human1_lib3.final_cell_0098	19.6619	20.3503	beta
human3_lib3.final_cell_0371	54.6108	7.29652	beta
human3_lib2.final_cell_0583	-51.0827	-15.0995	alpha
human4_lib3.final_cell_0052	-9.95348	-25.5052	beta
human3_lib1.final_cell_0087	48.5634	-49.1035	acinar
human3_lib3.final_cell_0241	43.8557	-48.9398	acinar
human2_lib2.final_cell_0058	16.1374	-16.1995	beta
human2_lib1.final_cell_0483	21.7066	-14.9668	beta
human3_lib2.final_cell_0032	49.1975	-46.2741	acinar
human3_lib2.final_cell_0740	12.2197	43.1908	beta
human4_lib3.final_cell_0482	-38.3366	56.5799	alpha
human1_lib1.final_cell_0241	7.38681	13.991	beta
human1_lib2.final_cell_0012	4.39243	60.2311	delta
human2_lib2.final_cell_0230	17.4258	-15.7328	beta
human1_lib2.final_cell_0131	-52.7127	30.5042	alpha
human1_lib1.final_cell_0143	4.47239	4.29367	beta
human4_lib3.final_cell_0413	-15.0579	-70.9371	ductal
human1_lib3.final_cell_0660	-50.5759	28.3345	alpha
human4_lib3.final_cell_0582	-0.936457	-23.3209	beta
human2_lib2.final_cell_0076	8.02319	-57.5028	ductal
human2_lib2.final_cell_0490	-14.419	43.1019	alpha
human3_lib1.final_cell_0537	-35.9456	3.53663	alpha
human1_lib2.final_cell_0424	57.6307	50.7486	endothelial
human2_lib2.final_cell_0439	20.2915	-19.2403	beta
human2_lib1.final_cell_0156	19.086	67.0188	delta
human1_lib2.final_cell_0332	-20.1954	-63.6952	ductal
human3_lib3.final_cell_0629	46.2198	12.5329	beta
human1_lib1.final_cell_0253	12.4268	16.2289	beta
human1_lib3.final_cell_0643	5.33154	2.25752	beta
human1_lib2.final_cell_0151	8.59503	66.3114	delta
human4_lib1.final_cell_0562	-37.2971	48.0381	alpha
human3_lib2.final_cell_0746	-46.6783	18.4043	alpha
human4_lib1.final_cell_0428	-44.3007	49.3724	alpha
human3_lib4.final_cell_0014	44.8422	-52.9136	acinar
human3_lib3.final_cell_0500	-45.5011	-21.036	alpha
human3_lib4.final_cell_0189	-52.4499	-0.277354	alpha
human4_lib3.final_cell_0315	0.702501	-30.0834	beta
human4_lib1.final_cell_0052	-14.0882	-73.2737	ductal
human3_lib2.final_cell_0342	61.4184	9.05498	beta
human1_lib2.final_cell_0189	6.91443	8.73437	beta
human2_lib3.final_cell_0195	11.6728	-18.8546	beta
human3_lib2.final_cell_0098	49.7684	-38.2929	acinar
human4_lib3.final_cell_0370	-4.51885	-21.077	beta
human3_lib2.final_cell_0023	33.5676	-59.4547	acinar
human3_lib1.final_cell_0863	50.0075	38.6938	endothelial
human1_lib3.final_cell_0647	3.37893	1.97709	beta
human3_lib3.final_cell_0851	45.1999	-33.5167	acinar
human1_lib2.final_cell_0164	6.3143	15.2654	beta
human2_lib2.final_cell_0200	-9.12438	-55.8145	ductal
human3_lib4.final_cell_0847	53.6019	39.213	endothelial
human1_lib2.final_cell_0128	-20.7925	-63.875	ductal
human3_lib1.final_cell_0726	-52.7631	-16.731	alpha
human1_lib3.final_cell_0474	-25.1943	-62.1909	ductal
human4_lib1.final_cell_0392	-44.8706	47.621	alpha
human2_lib2.final_cell_0354	-11.3644	45.8443	alpha
human4_lib3.final_cell_0316	-80.5547	14.7938	gamma
human1_lib2.final_cell_0553	7.80616	0.0512044	beta
human4_lib1.final_cell_0078	-5.20262	-26.4181	beta
human2_lib3.final_cell_0244	12.9783	-14.4976	beta
human2_lib2.final_cell_0587	26.5994	-2.63697	beta
human2_lib2.final_cell_0137	20.4719	-22.1348	beta
human3_lib3.final_cell_0033	43.2083	-44.5264	acinar
human3_lib2.final_cell_0652	44.5694	-47.8102	acinar
human1_lib3.final_cell_0006	28.7396	-39.6431	acinar
human3_lib4.final_cell_0365	47.1703	-40.7544	acinar
human2_lib3.final_cell_0132	18.1624	-20.9578	beta
human3_lib1.final_cell_0133	-32.484	-52.7415	ductal
human3_lib4.final_cell_0818	54.4736	37.8209	endothelial
human3_lib4.final_cell_0546	-44.1212	-12.1709	alpha
human1_lib1.final_cell_0114	9.8352	20.2419	beta
human3_lib3.final_cell_0091	25.0674	59.455	delta
human3_lib4.final_cell_0392	41.0802	14.6354	beta
human3_lib1.final_cell_0105	36.6632	-58.2074	acinar
human2_lib2.final_cell_0550	-84.4312	0.398977	gamma
human3_lib3.final_cell_0868	-24.3688	4.69294	alpha
human4_lib3.final_cell_0630	-12.0359	-17.6155	beta
human2_lib2.final_cell_0428	-10.7602	46.7537	alpha
human2_lib1.final_cell_0416	-18.7042	35.0911	alpha
human3_lib4.final_cell_0359	-27.2632	-45.9316	ductal
human1_lib3.final_cell_0500	-74.9996	11.7617	gamma
human2_lib1.final_cell_0129	-17.2132	-51.316	ductal
human3_lib1.final_cell_0192	24.8862	61.1831	delta
human3_lib3.final_cell_0783	-31.4503	4.61735	alpha
human4_lib1.final_cell_0312	5.18313	76.4432	delta
human2_lib2.final_cell_0497	-11.3718	27.8956	alpha
human4_lib3.final_cell_0661	-5.34338	-9.35171	beta
human3_lib4.final_cell_0037	35.7384	-50.3939	acinar
human1_lib2.final_cell_0476	58.2141	49.2233	endothelial
human1_lib3.final_cell_0335	5.00451	6.32568	beta
human3_lib3.final_cell_0685	50.3384	-34.5976	acinar
human1_lib1.final_cell_0013	3.26097	62.7906	delta
human1_lib3.final_cell_0368	0.823108	6.206	beta
human3_lib2.final_cell_0319	-33.4421	-60.2263	ductal
human1_lib3.final_cell_0372	-21.8015	-64.029	ductal
human2_lib3.final_cell_0385	-81.7645	2.64855	gamma
human2_lib1.final_cell_0048	-15.2222	39.3507	alpha
human3_lib1.final_cell_0711	-36.0353	-52.7786	ductal
human2_lib2.final_cell_0049	9.85671	41.9434	beta
human2_lib1.final_cell_0121	-8.30269	-50.7561	ductal
human1_lib3.final_cell_0671	55.6268	52.0076	endothelial
human3_lib1.final_cell_0818	-54.8945	0.755748	alpha
human3_lib1.final_cell_0871	-38.1995	-52.7574	ductal
human1_lib3.final_cell_0371	6.28764	63.0202	delta
human3_lib1.final_cell_0113	55.2503	-45.2361	acinar
human3_lib1.final_cell_0716	-33.2545	-3.97924	alpha
human4_lib1.final_cell_0488	-80.2276	11.7653	gamma
human3_lib2.final_cell_0834	41.032	1.75917	beta
human3_lib3.final_cell_0489	57.4318	10.5332	beta
human4_lib3.final_cell_0283	-14.3829	-66.4181	ductal
human3_lib2.final_cell_0084	48.5463	-43.8295	acinar
human1_lib3.final_cell_0482	7.73777	57.764	delta
human2_lib2.final_cell_0111	-0.463637	38.0358	alpha
human2_lib3.final_cell_0333	-22.69	40.9716	alpha
human3_lib2.final_cell_0476	-2.95131	-54.2656	ductal
human3_lib2.final_cell_0073	47.8689	-52.324	acinar
human3_lib4.final_cell_0610	43.2464	-38.9387	acinar
human2_lib1.final_cell_0049	-4.96137	-55.0849	ductal
human1_lib2.final_cell_0239	7.22709	57.0604	beta
human2_lib2.final_cell_0526	42.1038	72.4049	mast
human4_lib1.final_cell_0332	-42.1282	58.9782	alpha
human1_lib2.final_cell_0111	30.7845	-39.0658	acinar
human1_lib3.final_cell_0122	-0.0229055	15.9395	beta
human3_lib4.final_cell_0356	36.9862	-49.8264	acinar
human3_lib4.final_cell_0116	-33.6773	-0.750393	alpha
human3_lib4.final_cell_0451	-74.1139	4.59353	gamma
human2_lib1.final_cell_0338	-17.3186	34.8522	alpha
human3_lib2.final_cell_0835	-40.0011	-6.43682	alpha
human3_lib3.final_cell_0375	50.7597	42.448	endothelial
human4_lib3.final_cell_0016	-4.96268	-25.3622	beta
human3_lib3.final_cell_0293	55.1523	-32.4163	acinar
human3_lib3.final_cell_0812	-39.9162	-10.0381	alpha
human2_lib3.final_cell_0431	21.4465	-15.8002	beta
human3_lib3.final_cell_0005	51.4005	-48.5061	acinar
human2_lib3.final_cell_0559	-80.6744	2.02671	gamma
human1_lib3.final_cell_0324	10.4287	43.7851	beta
human2_lib2.final_cell_0322	-12.5263	47.9968	alpha
human3_lib4.final_cell_0653	-33.4468	-41.0084	ductal
human3_lib2.final_cell_0779	43.2803	-5.83614	beta
human2_lib1.final_cell_0542	27.0202	-3.59389	beta
human3_lib2.final_cell_0865	38.1348	1.72767	beta
human1_lib1.final_cell_0007	18.6335	21.8954	beta
human3_lib1.final_cell_0079	51.3395	-42.5888	acinar
human1_lib2.final_cell_0216	11.5566	10.6108	beta
human3_lib4.final_cell_0744	-30.3075	11.2103	alpha
human2_lib3.final_cell_0060	25.1223	-17.0086	beta
human4_lib3.final_cell_0326	6.37055	71.4515	delta
human3_lib1.final_cell_0172	30.9058	-59.8188	acinar
human1_lib1.final_cell_0009	28.1602	-39.677	acinar
human3_lib2.final_cell_0528	-38.5555	-49.1781	ductal
human1_lib3.final_cell_0506	4.87141	59.211	delta
human2_lib3.final_cell_0510	-7.24665	-61.098	ductal
human1_lib1.final_cell_0518	19.9687	1.35786	beta
human3_lib3.final_cell_0128	45.8516	-48.2735	acinar
human2_lib3.final_cell_0171	-26.3775	39.3269	alpha
human1_lib2.final_cell_0426	-48.3097	34.2898	alpha
human1_lib2.final_cell_0569	60.4704	51.2371	endothelial
human2_lib3.final_cell_0075	-21.8361	35.9001	alpha
human3_lib1.final_cell_0191	-45.3618	4.72758	alpha
human4_lib3.final_cell_0612	-4.49981	-10.5613	beta
human4_lib1.final_cell_0223	-16.9346	-68.8645	ductal
human4_lib3.final_cell_0573	-42.8657	45.8504	alpha
human3_lib1.final_cell_0622	-36.0764	3.53224	alpha
human3_lib3.final_cell_0030	47.6478	-48.3656	acinar
human3_lib1.final_cell_0823	52.0005	37.4564	endothelial
human4_lib3.final_cell_0411	-43.0605	47.8621	alpha
human2_lib1.final_cell_0256	-13.1335	-54.2582	ductal
human2_lib2.final_cell_0576	20.1952	-13.854	beta
human1_lib3.final_cell_0575	57.8987	48.5404	endothelial
human4_lib3.final_cell_0209	16.486	-52.8736	ductal
human2_lib3.final_cell_0252	18.748	63.0443	delta
human4_lib1.final_cell_0442	-38.7127	53.5297	alpha
human4_lib3.final_cell_0375	-43.7434	48.2119	alpha
human1_lib3.final_cell_0504	19.1617	4.03013	beta
human3_lib1.final_cell_0056	-49.4311	-11.3841	alpha
human1_lib2.final_cell_0434	22.0637	16.9461	beta
human3_lib1.final_cell_0294	58.5504	8.63932	beta
human3_lib3.final_cell_0420	-38.8509	-45.1379	ductal
human3_lib1.final_cell_0043	53.0778	-40.5233	acinar
human1_lib1.final_cell_0372	34.0053	-32.9603	acinar
human3_lib4.final_cell_0434	-36.3554	-57.3102	ductal
human1_lib2.final_cell_0259	36.0396	13.0559	beta
human3_lib2.final_cell_0302	-58.3525	-5.7835	alpha
human1_lib1.final_cell_0403	-76.8997	9.97969	gamma
human3_lib2.final_cell_0867	62.4961	-0.448752	beta
human3_lib1.final_cell_0688	-38.8576	-14.0611	alpha
human4_lib1.final_cell_0308	-45.6064	54.4165	alpha
human2_lib2.final_cell_0157	8.93378	-58.6802	ductal
human4_lib3.final_cell_0065	-0.170051	-25.0714	beta
human3_lib4.final_cell_0368	37.6399	-58.0645	acinar
human3_lib3.final_cell_0798	-50.3216	-8.52338	alpha
human1_lib3.final_cell_0588	8.59174	1.63094	beta
human4_lib3.final_cell_0051	-1.13969	-24.2337	beta
human3_lib3.final_cell_0376	-38.5563	9.34329	alpha
human3_lib4.final_cell_0456	-43.7635	-3.80776	alpha
human3_lib2.final_cell_0312	-56.4954	-7.41296	alpha
human1_lib1.final_cell_0221	7.60669	61.1587	delta
human3_lib3.final_cell_0832	37.4372	-1.02636	beta
human2_lib3.final_cell_0393	-16.6605	28.2084	alpha
human4_lib1.final_cell_0383	-2.87492	-20.9695	beta
human2_lib3.final_cell_0394	19.0269	-18.0828	beta
human4_lib1.final_cell_0350	-45.2161	52.6708	alpha
human1_lib1.final_cell_0365	-48.6149	34.4644	alpha
human3_lib4.final_cell_0734	39.4491	-5.20334	beta
human3_lib3.final_cell_0139	42.1322	-33.6306	acinar
human3_lib4.final_cell_0032	36.1663	-58.0358	acinar
human1_lib3.final_cell_0085	8.61682	17.3909	beta
human3_lib3.final_cell_0671	41.7947	-6.27987	beta
human3_lib1.final_cell_0599	-30.0686	-42.5961	ductal
human1_lib1.final_cell_0131	-51.6906	38.1956	alpha
human1_lib1.final_cell_0303	5.69819	5.0081	beta
human3_lib1.final_cell_0440	47.4875	-34.5105	acinar
human3_lib2.final_cell_0633	-49.9969	17.2	alpha
human1_lib3.final_cell_0594	-2.52359	62.752	epsilon
human3_lib3.final_cell_0156	49.9592	-44.9933	acinar
human3_lib4.final_cell_0779	56.3753	-39.1058	acinar
human3_lib1.final_cell_0479	43.1154	-7.19574	beta
human1_lib1.final_cell_0236	21.9226	16.4547	beta
human3_lib2.final_cell_0128	-37.9055	-44.2642	ductal
human4_lib3.final_cell_0655	11.0065	73.8011	delta
human1_lib2.final_cell_0541	21.3922	1.6088	beta
human1_lib3.final_cell_0036	4.25777	64.2953	delta
human3_lib1.final_cell_0132	53.7363	5.69451	beta
human4_lib3.final_cell_0406	-7.46059	-11.8029	beta
human1_lib2.final_cell_0295	20.9342	20.7562	beta
human1_lib3.final_cell_0165	30.9049	27.8934	beta
human4_lib3.final_cell_0495	-38.5355	54.7079	alpha
human4_lib3.final_cell_0004	-10.4082	-25.1238	beta
human2_lib2.final_cell_0216	-23.4835	32.061	alpha
human4_lib1.final_cell_0572	56.1784	43.3611	endothelial
human1_lib3.final_cell_0174	-54.7981	37.1365	alpha
human4_lib1.final_cell_0520	-9.67765	-65.5668	ductal
human3_lib4.final_cell_0127	44.8802	-31.9577	acinar
human1_lib2.final_cell_0163	13.5794	13.756	beta
human1_lib1.final_cell_0556	19.8061	0.654477	beta
human3_lib4.final_cell_0454	-29.9675	-13.4926	alpha
human3_lib1.final_cell_0454	-42.2959	5.10756	alpha
human1_lib3.final_cell_0578	-34.0968	-63.0646	ductal
human3_lib3.final_cell_0463	-39.0996	6.04824	alpha
human4_lib3.final_cell_0154	3.6277	72.8994	delta
human3_lib2.final_cell_0078	18.7043	-56.3115	acinar
human4_lib1.final_cell_0012	-19.2782	-52.7133	ductal
human3_lib1.final_cell_0404	45.9532	9.60318	beta
human3_lib1.final_cell_0892	-30.8558	5.51106	alpha
human4_lib3.final_cell_0214	-10.0337	-24.8451	beta
human2_lib3.final_cell_0462	-17.5604	38.1176	alpha
human3_lib2.final_cell_0504	-36.1525	-48.316	ductal
human3_lib4.final_cell_0045	-42.1197	-10.3689	alpha
human3_lib1.final_cell_0041	32.4299	-59.6886	acinar
human3_lib3.final_cell_0867	13.2547	32.6146	alpha
human1_lib2.final_cell_0606	8.19448	3.36124	beta
human3_lib4.final_cell_0842	53.5496	39.5687	endothelial
human4_lib3.final_cell_0078	1.25544	-25.904	beta
human4_lib1.final_cell_0390	1.20649	-19.2709	beta
human2_lib1.final_cell_0237	14.8002	-9.30472	beta
human1_lib1.final_cell_0444	30.538	-40.509	acinar
human4_lib1.final_cell_0072	-2.7611	-26.9199	beta
human2_lib3.final_cell_0224	-21.8704	33.3793	alpha
human3_lib1.final_cell_0690	-52.6106	1.26379	alpha
human1_lib2.final_cell_0162	7.68704	7.65697	beta
human4_lib1.final_cell_0533	8.76031	76.8591	delta
human2_lib3.final_cell_0034	-18.2994	44.1324	alpha
human3_lib3.final_cell_0464	41.161	14.701	beta
human3_lib3.final_cell_0400	-33.5196	14.9938	alpha
human4_lib1.final_cell_0180	7.20206	72.702	delta
human3_lib4.final_cell_0739	48.8447	3.00044	beta
human3_lib4.final_cell_0584	-42.3405	9.5702	alpha
human4_lib3.final_cell_0328	-11.1524	-72.7506	ductal
human3_lib3.final_cell_0841	52.0159	38.3195	endothelial
human1_lib1.final_cell_0282	2.09043	13.2897	beta
human3_lib4.final_cell_0876	53.7172	37.4566	endothelial
human2_lib1.final_cell_0005	18.8337	69.7481	delta
human4_lib3.final_cell_0212	-44.2466	60.3444	alpha
human2_lib2.final_cell_0304	-21.3309	29.9854	alpha
human4_lib3.final_cell_0311	-9.47478	-65.4962	ductal
human3_lib1.final_cell_0887	40.3569	-5.88614	beta
human2_lib2.final_cell_0153	8.36421	-56.1276	ductal
human1_lib1.final_cell_0535	2.62427	2.69737	beta
human4_lib3.final_cell_0043	-25.7557	-61.2566	ductal
human2_lib1.final_cell_0114	-17.1351	49.3005	alpha
human1_lib1.final_cell_0540	55.5815	53.7163	endothelial
human3_lib2.final_cell_0854	-47.894	18.8487	alpha
human1_lib3.final_cell_0358	9.81964	43.6759	beta
human1_lib3.final_cell_0519	18.1511	27.8505	endothelial
human1_lib3.final_cell_0355	4.07402	14.8892	beta
human2_lib3.final_cell_0546	42.2386	72.498	mast
human3_lib1.final_cell_0825	44.7301	-3.02303	beta
human2_lib3.final_cell_0090	-19.1103	32.9623	alpha
human1_lib3.final_cell_0166	33.277	20.4544	beta
human3_lib1.final_cell_0316	50.6902	20.2387	beta
human3_lib4.final_cell_0720	-47.2709	-10.1877	alpha
human1_lib1.final_cell_0270	-56.7386	29.9855	alpha
human1_lib2.final_cell_0094	17.6882	14.8533	beta
human4_lib1.final_cell_0059	-3.29479	-27.5003	beta
human3_lib3.final_cell_0449	-37.5606	-48.9976	ductal
human3_lib3.final_cell_0133	-42.8032	-10.2948	alpha
human1_lib2.final_cell_0207	10.6057	10.8674	beta
human4_lib3.final_cell_0282	-14.3386	-74.0836	ductal
human3_lib3.final_cell_0595	-37.0853	-1.72134	alpha
human3_lib3.final_cell_0428	46.7819	-7.05939	beta
human3_lib1.final_cell_0154	51.9447	13.5405	beta
human4_lib1.final_cell_0005	-13.4138	-71.4612	ductal
human3_lib3.final_cell_0450	17.6719	57.869	delta
human3_lib3.final_cell_0533	-52.3486	-14.9108	alpha
human4_lib1.final_cell_0047	-8.84801	-18.3723	beta
human4_lib3.final_cell_0610	0.476682	-24.9923	beta
human4_lib3.final_cell_0216	16.4326	-52.729	ductal
human3_lib2.final_cell_0200	58.2461	6.37877	beta
human3_lib1.final_cell_0101	38.1698	-54.8205	acinar
human3_lib4.final_cell_0541	57.2387	1.94071	beta
human3_lib4.final_cell_0650	-44.8269	-13.7408	alpha
human2_lib1.final_cell_0301	-14.4239	39.2315	alpha
human4_lib1.final_cell_0179	-83.2309	15.4947	gamma
human2_lib2.final_cell_0138	-25.0448	39.8565	alpha
human3_lib1.final_cell_0084	56.6687	-45.4771	acinar
human4_lib1.final_cell_0131	-15.4413	-68.1416	ductal
human1_lib1.final_cell_0323	-3.57829	67.2608	epsilon
human4_lib3.final_cell_0515	-0.845767	-23.3564	beta
human3_lib3.final_cell_0250	53.5269	19.3322	ductal
human2_lib2.final_cell_0436	-11.8734	45.3148	alpha
human3_lib4.final_cell_0276	-43.4981	4.91516	alpha
human2_lib2.final_cell_0271	23.1346	-22.2329	beta
human2_lib3.final_cell_0175	-14.8204	38.2134	alpha
human3_lib3.final_cell_0227	33.4596	-51.107	acinar
human2_lib2.final_cell_0379	-12.613	46.0771	alpha
human4_lib1.final_cell_0229	5.93135	75.9179	delta
human4_lib3.final_cell_0701	14.642	-49.9134	ductal
human1_lib1.final_cell_0035	4.44803	12.2929	beta
human2_lib2.final_cell_0478	58.6202	41.387	endothelial
human2_lib1.final_cell_0245	-13.3976	35.0373	alpha
human3_lib3.final_cell_0008	38.3331	-49.9266	acinar
human3_lib2.final_cell_0177	60.5504	3.9844	beta
human2_lib3.final_cell_0061	-16.1875	35.3408	alpha
human2_lib1.final_cell_0451	-13.3331	27.4251	alpha
human4_lib1.final_cell_0222	-12.1021	-24.6718	beta
human3_lib2.final_cell_0316	-32.914	-37.494	ductal
human2_lib1.final_cell_0384	-14.0449	40.2898	alpha
human2_lib3.final_cell_0152	-19.7245	43.8797	alpha
human3_lib3.final_cell_0681	5.00906	42.5499	gamma
human2_lib3.final_cell_0213	-20.8162	49.8958	alpha
human4_lib1.final_cell_0517	-78.4935	9.12863	gamma
human3_lib4.final_cell_0447	-27.7112	-43.8123	ductal
human1_lib2.final_cell_0294	-56.9881	32.1936	alpha
human4_lib3.final_cell_0419	-12.5023	-18.0079	beta
human3_lib4.final_cell_0139	56.8475	-37.6218	acinar
human2_lib3.final_cell_0228	-14.1223	31.9988	alpha
human1_lib2.final_cell_0622	58.9552	51.0582	endothelial
human3_lib3.final_cell_0181	49.5283	11.8072	beta
human3_lib4.final_cell_0169	64.6388	6.71591	beta
human1_lib2.final_cell_0244	10.7228	19.8427	beta
human1_lib1.final_cell_0257	-57.8356	29.0822	alpha
human3_lib4.final_cell_0450	65.4667	4.8408	beta
human3_lib1.final_cell_0519	-54.1222	-12.8783	alpha
human2_lib3.final_cell_0078	-4.63493	-55.9274	ductal
human3_lib1.final_cell_0836	41.0072	0.0707026	beta
human3_lib2.final_cell_0042	44.9937	-47.084	acinar
human3_lib1.final_cell_0069	42.0742	-46.278	acinar
human3_lib3.final_cell_0680	33.9338	-54.3366	acinar
human4_lib3.final_cell_0198	-12.0644	-23.2291	beta
human2_lib3.final_cell_0383	58.3077	-32.3074	ductal
human3_lib2.final_cell_0333	-27.4041	-35.05	ductal
human4_lib1.final_cell_0336	-10.1195	-67.3024	ductal
human3_lib2.final_cell_0010	48.7156	-49.1453	acinar
human2_lib3.final_cell_0358	-84.178	2.24685	gamma
human3_lib2.final_cell_0616	45.215	-35.4105	acinar
human1_lib1.final_cell_0261	-27.5493	-60.8757	ductal
human3_lib3.final_cell_0204	28.1121	-56.9629	acinar
human3_lib4.final_cell_0811	55.2276	-50.059	acinar
human2_lib1.final_cell_0454	-18.2335	29.4145	alpha
human2_lib1.final_cell_0395	-7.45733	-61.3132	ductal
human2_lib2.final_cell_0312	-17.7547	31.01	alpha
human2_lib2.final_cell_0397	14.2967	-13.2772	beta
human3_lib1.final_cell_0692	-25.9668	7.15747	alpha
human2_lib1.final_cell_0099	-26.5311	37.7082	alpha
human3_lib2.final_cell_0374	38.2388	-59.129	acinar
human3_lib4.final_cell_0435	25.9361	58.108	delta
human3_lib1.final_cell_0444	-47.5989	3.40024	alpha
human2_lib1.final_cell_0166	-16.7208	50.7357	alpha
human4_lib1.final_cell_0443	-41.0149	58.5452	alpha
human1_lib3.final_cell_0291	-20.7794	-64.5729	ductal
human4_lib1.final_cell_0576	-16.6097	-18.4846	beta
human3_lib4.final_cell_0501	55.0519	16.7357	beta
human4_lib1.final_cell_0013	-18.8651	-68.4154	ductal
human1_lib2.final_cell_0191	7.04934	60.0044	delta
human3_lib3.final_cell_0113	43.1525	-33.0925	acinar
human1_lib3.final_cell_0663	22.2159	1.08701	beta
human3_lib2.final_cell_0044	46.5739	-57.4363	acinar
human2_lib3.final_cell_0527	-81.4215	3.29825	gamma
human1_lib1.final_cell_0555	-24.0237	-41.1799	ductal
human3_lib1.final_cell_0792	-48.2329	16.8927	alpha
human4_lib1.final_cell_0108	-46.3929	49.9577	alpha
human1_lib2.final_cell_0034	9.66417	61.7307	delta
human1_lib3.final_cell_0405	5.55569	16.3827	beta
human3_lib3.final_cell_0585	-47.05	-15.4908	alpha
human3_lib3.final_cell_0384	-41.7284	-0.420505	alpha
human2_lib2.final_cell_0037	20.3712	-22.0225	beta
human3_lib1.final_cell_0500	-34.6086	-38.1922	ductal
human3_lib3.final_cell_0003	55.6413	-45.2823	acinar
human3_lib2.final_cell_0820	38.5556	-2.26513	beta
human1_lib3.final_cell_0496	30.4668	26.4048	beta
human2_lib1.final_cell_0502	-21.7332	30.336	alpha
human2_lib2.final_cell_0502	0.585743	37.6939	alpha
human3_lib1.final_cell_0023	38.5129	-47.9379	acinar
human3_lib4.final_cell_0626	49.7212	-51.3503	acinar
human3_lib2.final_cell_0152	-57.3791	-12.7231	alpha
human3_lib3.final_cell_0232	60.1398	6.55068	beta
human4_lib3.final_cell_0551	-3.73745	-20.0025	beta
human2_lib3.final_cell_0349	58.4837	42.1641	endothelial
human2_lib3.final_cell_0149	17.816	63.7099	delta
human3_lib4.final_cell_0723	43.0901	-2.22038	beta
human2_lib2.final_cell_0077	17.1776	-22.5248	beta
human4_lib3.final_cell_0621	-10.3504	-12.8199	beta
human3_lib4.final_cell_0423	-43.4052	0.210565	alpha
human3_lib3.final_cell_0844	52.4319	-0.595209	beta
human3_lib4.final_cell_0798	38.595	0.932832	beta
human1_lib1.final_cell_0430	57.2516	47.66	endothelial
human3_lib2.final_cell_0308	63.8701	14.3584	beta
human4_lib3.final_cell_0382	-48.5124	49.7664	alpha
human4_lib3.final_cell_0026	8.34861	74.8869	delta
human4_lib1.final_cell_0515	-6.21958	-19.151	beta
human1_lib3.final_cell_0132	18.1995	13.1783	beta
human2_lib1.final_cell_0412	-26.1487	40.0102	alpha
human1_lib3.final_cell_0618	59.9345	48.8757	endothelial
human3_lib4.final_cell_0524	-23.1332	-45.7901	ductal
human2_lib2.final_cell_0380	-11.3503	28.4618	alpha
human3_lib3.final_cell_0922	52.5217	36.3381	endothelial
human2_lib2.final_cell_0534	-22.9858	28.2046	alpha
human1_lib1.final_cell_0321	10.2998	62.7319	delta
human2_lib2.final_cell_0079	-14.9565	50.0629	alpha
human3_lib2.final_cell_0658	-35.6098	14.0505	alpha
human3_lib3.final_cell_0525	49.9257	-40.5273	acinar
human2_lib1.final_cell_0400	-13.9282	30.5714	alpha
human4_lib3.final_cell_0436	-80.2114	15.318	gamma
human3_lib3.final_cell_0352	-32.6238	-1.62575	alpha
human1_lib2.final_cell_0578	58.5635	50.1199	endothelial
human3_lib4.final_cell_0731	-29.9867	-7.74885	alpha
human3_lib2.final_cell_0731	54.6752	-0.160871	beta
human2_lib2.final_cell_0302	-12.8732	45.1606	alpha
human2_lib3.final_cell_0520	-20.2272	22.0978	alpha
human3_lib1.final_cell_0196	54.4273	-42.235	acinar
human2_lib2.final_cell_0254	19.465	-19.6779	beta
human2_lib2.final_cell_0367	-12.0622	44.8404	alpha
human3_lib1.final_cell_0258	-27.684	-13.3655	alpha
human4_lib3.final_cell_0102	-42.6233	49.6042	alpha
human2_lib1.final_cell_0315	-21.1481	31.5316	alpha
human3_lib3.final_cell_0492	-46.174	-3.86544	alpha
human2_lib3.final_cell_0264	-19.0329	36.1618	alpha
human3_lib1.final_cell_0298	22.1799	55.198	delta
human2_lib1.final_cell_0345	-13.5662	37.9895	alpha
human2_lib2.final_cell_0038	-24.9908	39.1515	alpha
human4_lib1.final_cell_0253	-10.8791	-21.836	beta
human3_lib3.final_cell_0191	37.504	-48.4988	acinar
human3_lib2.final_cell_0443	43.0849	14.9638	beta
human2_lib3.final_cell_0277	-25.9192	36.0437	alpha
human4_lib1.final_cell_0500	-6.55625	-16.2604	beta
human1_lib3.final_cell_0299	-56.6087	31.3172	alpha
human1_lib3.final_cell_0071	4.04934	17.5916	beta
human4_lib3.final_cell_0239	-43.3606	51.5405	alpha
human2_lib3.final_cell_0423	-82.7631	4.59342	gamma
human3_lib3.final_cell_0090	51.7759	-51.43	acinar
human1_lib2.final_cell_0178	31.9313	27.5041	beta
human3_lib1.final_cell_0750	40.2547	3.98253	beta
human3_lib1.final_cell_0100	53.9051	14.2941	beta
human2_lib1.final_cell_0019	-20.8795	39.9511	alpha
human1_lib1.final_cell_0110	2.64401	60.9412	delta
human3_lib4.final_cell_0769	20.4501	51.2538	delta
human3_lib4.final_cell_0302	-33.589	0.30696	alpha
human2_lib3.final_cell_0380	-20.4581	41.8431	alpha
human2_lib1.final_cell_0184	-16.4603	43.6872	alpha
human2_lib3.final_cell_0278	-18.2834	37.1711	alpha
human3_lib2.final_cell_0118	52.4728	-42.1531	acinar
human3_lib1.final_cell_0739	52.5693	37.6042	endothelial
human2_lib2.final_cell_0147	23.2501	-20.5623	beta
human3_lib4.final_cell_0013	41.122	-54.3323	acinar
human1_lib1.final_cell_0347	8.32276	44.2312	beta
human3_lib2.final_cell_0619	-45.7265	-5.75038	alpha
human3_lib4.final_cell_0601	36.3934	-54.8728	acinar
human3_lib2.final_cell_0120	48.26	-46.4291	acinar
human4_lib1.final_cell_0198	-1.5194	-29.5826	beta
human1_lib3.final_cell_0739	18.6327	0.864634	beta
human3_lib4.final_cell_0081	52.3875	-46.7855	acinar
human3_lib4.final_cell_0874	-22.026	8.35209	alpha
human3_lib4.final_cell_0183	17.3164	58.3429	delta
human3_lib3.final_cell_0049	46.966	-45.2329	acinar
human4_lib3.final_cell_0678	-1.00236	-14.2996	beta
human1_lib1.final_cell_0002	27.9408	-39.9061	acinar
human1_lib2.final_cell_0446	15.5654	9.63982	beta
human4_lib1.final_cell_0592	-22.671	-57.3651	ductal
human1_lib2.final_cell_0053	17.022	13.4233	beta
human4_lib3.final_cell_0320	-10.8321	-25.9498	beta
human2_lib2.final_cell_0274	-84.8996	2.93149	gamma
human1_lib1.final_cell_0068	13.0548	21.4508	beta
human3_lib3.final_cell_0164	38.1752	-55.8479	acinar
human4_lib3.final_cell_0019	-47.057	49.4249	alpha
human1_lib3.final_cell_0610	-30.7404	-58.8271	ductal
human1_lib3.final_cell_0436	-58.5283	30.4841	alpha
human3_lib2.final_cell_0566	54.1209	3.09486	beta
human4_lib3.final_cell_0238	-42.2804	59.0652	alpha
human3_lib4.final_cell_0740	-47.9834	16.5452	alpha
human2_lib1.final_cell_0332	17.7705	-23.1054	beta
human3_lib2.final_cell_0482	-50.0633	-15.2901	alpha
human3_lib4.final_cell_0330	53.9813	0.953969	beta
human2_lib3.final_cell_0427	9.69055	-54.5462	ductal
human2_lib3.final_cell_0365	-19.2649	35.1634	alpha
human3_lib2.final_cell_0684	54.2531	-34.5286	acinar
human4_lib3.final_cell_0020	14.9491	-53.4678	ductal
human4_lib1.final_cell_0463	1.92191	-23.4431	beta
human3_lib3.final_cell_0050	42.5646	-56.7525	acinar
human1_lib2.final_cell_0331	-57.8579	27.6605	alpha
human1_lib3.final_cell_0381	-57.177	30.5954	alpha
human1_lib2.final_cell_0529	19.0931	4.42959	beta
human4_lib3.final_cell_0114	-39.483	57.8417	alpha
human1_lib3.final_cell_0277	5.24659	5.86892	beta
human4_lib3.final_cell_0021	16.879	-55.3365	ductal
human1_lib1.final_cell_0402	30.9059	25.6362	beta
human3_lib4.final_cell_0533	48.9176	-31.5924	acinar
human1_lib3.final_cell_0066	9.0918	63.9579	delta
human3_lib4.final_cell_0142	46.1762	-48.6223	acinar
human1_lib2.final_cell_0161	12.004	4.74442	beta
human1_lib3.final_cell_0181	6.67144	56.8468	delta
human2_lib1.final_cell_0547	-16.3717	-59.0079	ductal
human3_lib4.final_cell_0366	-47.7451	-8.97231	alpha
human1_lib3.final_cell_0349	31.3113	24.703	beta
human2_lib2.final_cell_0210	-17.7893	44.9321	alpha
human1_lib3.final_cell_0492	19.2147	4.43728	beta
human3_lib1.final_cell_0414	47.0407	18.8789	beta
human2_lib2.final_cell_0044	10.2444	-54.0973	ductal
human1_lib2.final_cell_0603	6.69037	0.071615	beta
human3_lib3.final_cell_0078	43.4266	-57.0577	acinar
human2_lib2.final_cell_0075	-10.9399	-54.3438	ductal
human4_lib1.final_cell_0329	-81.1114	14.444	gamma
human1_lib3.final_cell_0140	5.71237	22.1985	beta
human3_lib2.final_cell_0670	-4.06109	-54.6452	ductal
human1_lib1.final_cell_0089	32.6463	27.7121	beta
human4_lib1.final_cell_0215	-6.79247	-22.0229	beta
human3_lib1.final_cell_0147	62.5328	11.3482	beta
human2_lib3.final_cell_0356	-9.62519	-58.5616	ductal
human3_lib4.final_cell_0532	52.7385	2.70741	beta
human3_lib2.final_cell_0289	-41.6027	-45.7153	ductal
human3_lib3.final_cell_0655	-48.6377	15.9413	alpha
human2_lib3.final_cell_0079	11.3342	-18.4942	beta
human2_lib2.final_cell_0247	-10.6269	-55.0961	ductal
human1_lib1.final_cell_0220	3.69777	15.154	beta
human3_lib2.final_cell_0514	-44.6166	7.53	alpha
human1_lib1.final_cell_0196	4.73425	11.0629	beta
human3_lib2.final_cell_0763	49.0604	-40.9639	acinar
human2_lib1.final_cell_0303	-8.97689	-57.5849	ductal
human2_lib3.final_cell_0208	58.7788	42.1406	endothelial
human2_lib2.final_cell_0152	-12.9293	47.6261	alpha
human3_lib1.final_cell_0008	39.9894	-58.1692	acinar
human3_lib3.final_cell_0568	-52.486	-10.2179	alpha
human4_lib1.final_cell_0117	-45.64	45.7642	alpha
human2_lib1.final_cell_0279	-22.2385	47.2313	alpha
human3_lib2.final_cell_0163	56.1531	-2.12095	beta
human2_lib3.final_cell_0399	-82.0864	3.69585	gamma
human4_lib1.final_cell_0531	-5.18296	-10.3657	beta
human4_lib3.final_cell_0487	-7.96806	-22.7734	beta
human3_lib3.final_cell_0756	-26.4035	8.02426	alpha
human3_lib1.final_cell_0396	52.8697	16.699	beta
human3_lib4.final_cell_0775	-39.8956	-49.4594	ductal
human4_lib1.final_cell_0375	-12.9079	-19.7427	beta
human3_lib2.final_cell_0667	42.0204	-5.98502	beta
human4_lib3.final_cell_0104	15.8331	-51.7037	ductal
human2_lib2.final_cell_0566	10.5882	-52.4405	ductal
human1_lib2.final_cell_0041	2.8829	60.3922	delta
human4_lib3.final_cell_0262	-1.38181	-27.4189	beta
human2_lib2.final_cell_0130	12.8772	-16.5093	beta
human2_lib3.final_cell_0143	-18.2399	34.7664	alpha
human1_lib2.final_cell_0265	-50.8009	35.1019	alpha
human4_lib3.final_cell_0433	-35.1787	54.6527	alpha
human3_lib2.final_cell_0411	54.1185	-43.1443	acinar
human3_lib2.final_cell_0557	-35.5549	13.0166	alpha
human1_lib1.final_cell_0406	-53.9593	32.0875	alpha
human1_lib1.final_cell_0415	9.80711	48.2357	delta
human3_lib4.final_cell_0151	-35.7294	-3.58881	alpha
human3_lib4.final_cell_0500	-47.37	1.32923	alpha
human3_lib2.final_cell_0691	42.9111	13.07	beta
human3_lib2.final_cell_0230	56.1318	-11.32	beta
human3_lib1.final_cell_0832	-34.8616	10.1641	alpha
human3_lib1.final_cell_0330	54.8434	-35.539	acinar
human2_lib2.final_cell_0350	-16.1244	45.455	alpha
human4_lib3.final_cell_0480	-1.34272	-23.4176	beta
human4_lib3.final_cell_0534	-14.5056	-16.6682	beta
human1_lib3.final_cell_0676	55.548	51.8301	endothelial
human2_lib1.final_cell_0362	-18.5027	-49.8306	ductal
human4_lib3.final_cell_0423	-9.28055	-71.1884	ductal
human1_lib1.final_cell_0067	-57.0756	33.5118	alpha
human4_lib3.final_cell_0197	-5.18371	-27.0796	beta
human2_lib1.final_cell_0300	-19.8713	45.4352	alpha
human1_lib1.final_cell_0414	-48.3961	37.0518	alpha
human1_lib3.final_cell_0134	11.9277	23.513	beta
human3_lib2.final_cell_0555	-33.1924	-11.0179	alpha
human3_lib3.final_cell_0071	42.7427	-50.3376	acinar
human2_lib2.final_cell_0267	-10.996	49.5283	alpha
human3_lib3.final_cell_0510	-47.5259	2.09375	alpha
human4_lib1.final_cell_0075	0.655694	-21.1326	beta
human1_lib3.final_cell_0155	4.00765	58.3772	delta
human3_lib1.final_cell_0238	45.5742	-60.6899	acinar
human2_lib3.final_cell_0467	-16.8506	-50.0843	ductal
human2_lib3.final_cell_0009	-20.9294	35.1028	alpha
human4_lib1.final_cell_0333	-43.105	54.0347	alpha
human3_lib4.final_cell_0579	-26.558	-13.642	alpha
human3_lib4.final_cell_0888	-29.8345	-51.8715	ductal
human2_lib3.final_cell_0035	15.8466	-23.216	beta
human2_lib1.final_cell_0077	-17.3611	42.2647	alpha
human2_lib1.final_cell_0203	-21.5163	31.9163	alpha
human4_lib1.final_cell_0325	-13.0703	-23.8826	beta
human3_lib1.final_cell_0436	55.2043	40.4323	endothelial
human3_lib4.final_cell_0845	41.9887	-3.02384	beta
human3_lib1.final_cell_0757	40.1501	-4.12955	beta
human1_lib2.final_cell_0372	57.3298	48.8491	endothelial
human3_lib1.final_cell_0668	-22.0681	9.02248	alpha
human2_lib1.final_cell_0093	-25.3229	38.2899	alpha
human3_lib3.final_cell_0637	46.847	-31.4253	acinar
human3_lib1.final_cell_0235	52.2394	8.20757	beta
human3_lib3.final_cell_0839	-28.7156	-7.74005	alpha
human4_lib1.final_cell_0039	-45.0507	50.682	alpha
human3_lib4.final_cell_0387	53.7689	0.119679	beta
human2_lib3.final_cell_0489	-17.9235	32.6509	alpha
human4_lib3.final_cell_0288	-10.1313	-19.6049	beta
human1_lib1.final_cell_0382	34.2114	-33.1249	acinar
human2_lib3.final_cell_0257	14.1091	-22.2565	beta
human2_lib3.final_cell_0468	-8.51179	-60.4265	ductal
human4_lib3.final_cell_0012	-7.52996	-23.9712	beta
human3_lib2.final_cell_0001	41.6715	-53.8345	acinar
human1_lib3.final_cell_0195	5.70875	58.0192	delta
human3_lib4.final_cell_0033	47.8428	-55.0601	acinar
human3_lib4.final_cell_0005	57.5382	-39.6112	acinar
human1_lib1.final_cell_0224	21.8513	20.2635	beta
human2_lib2.final_cell_0118	21.0629	-20.9736	beta
human4_lib1.final_cell_0243	-11.9698	-21.4246	beta
human1_lib3.final_cell_0466	24.4011	24.0579	beta
human3_lib1.final_cell_0228	-36.5613	-50.3599	ductal
human3_lib2.final_cell_0495	-37.058	4.54329	alpha
human2_lib3.final_cell_0504	-16.6412	26.6918	alpha
human2_lib2.final_cell_0237	-10.9834	47.2109	alpha
human3_lib2.final_cell_0202	-49.3762	-10.8453	alpha
human3_lib4.final_cell_0856	-29.02	-2.27849	alpha
human3_lib4.final_cell_0272	37.487	-60.4365	acinar
human4_lib1.final_cell_0503	-5.43277	-15.1195	beta
human2_lib3.final_cell_0323	9.5381	-58.6837	ductal
human4_lib3.final_cell_0331	6.39362	75.928	delta
human1_lib1.final_cell_0362	-75.271	11.76	gamma
human3_lib3.final_cell_0138	55.3803	11.7673	beta
human3_lib2.final_cell_0522	-34.6206	-2.12556	alpha
human3_lib4.final_cell_0839	37.6014	-4.62761	beta
human3_lib1.final_cell_0184	-46.3844	-2.97893	alpha
human2_lib2.final_cell_0424	-9.95089	45.9507	alpha
human4_lib3.final_cell_0251	-11.4902	-19.589	beta
human2_lib1.final_cell_0325	20.1903	-13.3349	beta
human1_lib2.final_cell_0410	8.38142	65.9706	delta
human3_lib4.final_cell_0523	-44.36	-13.08	alpha
human3_lib3.final_cell_0881	21.0709	51.2673	delta
human2_lib1.final_cell_0344	-13.6838	-57.7104	ductal
human3_lib4.final_cell_0336	-48.468	-11.258	alpha
human2_lib3.final_cell_0532	-16.9831	33.2072	alpha
human4_lib1.final_cell_0230	-39.8072	58.4963	alpha
human4_lib1.final_cell_0225	-2.21225	-28.9481	beta
human1_lib2.final_cell_0054	29.245	-40.6004	acinar
human1_lib1.final_cell_0217	-31.0315	-60.5859	ductal
human1_lib2.final_cell_0539	54.4106	51.9727	endothelial
human4_lib3.final_cell_0319	-16.1919	-18.7732	beta
human3_lib1.final_cell_0001	48.7846	-50.3811	acinar
human1_lib3.final_cell_0131	5.19354	21.0111	beta
human2_lib2.final_cell_0335	22.2135	69.7504	delta
human2_lib1.final_cell_0525	42.2122	72.5613	mast
human3_lib1.final_cell_0723	-46.25	18.4326	alpha
human4_lib1.final_cell_0530	9.55771	48.9126	delta
human1_lib2.final_cell_0300	0.67681	21.4461	beta
human1_lib3.final_cell_0390	-52.6048	34.388	alpha
human3_lib3.final_cell_0746	-32.6534	13.0695	alpha
human3_lib4.final_cell_0125	53.841	-45.4184	acinar
human3_lib1.final_cell_0591	58.2617	16.4981	beta
human2_lib1.final_cell_0045	-22.2345	46.0469	alpha
human1_lib3.final_cell_0049	-51.7533	37.3742	alpha
human3_lib2.final_cell_0153	57.1695	5.55024	beta
human2_lib1.final_cell_0067	-15.1282	-53.4	ductal
human1_lib1.final_cell_0466	31.3933	-34.18	acinar
human3_lib2.final_cell_0747	-23.1758	3.61469	alpha
human3_lib4.final_cell_0676	-46.6489	-6.46419	alpha
human3_lib1.final_cell_0783	-46.136	-17.2418	alpha
human4_lib1.final_cell_0276	-7.89247	-16.6624	beta
human1_lib2.final_cell_0604	19.8079	0.685288	beta
human4_lib3.final_cell_0250	8.7815	73.048	delta
human2_lib3.final_cell_0481	13.938	-15.6877	beta
human3_lib4.final_cell_0186	-42.5279	-8.37796	alpha
human4_lib1.final_cell_0518	-39.3892	53.3266	alpha
human2_lib3.final_cell_0335	10.3755	-57.1962	ductal
human4_lib3.final_cell_0460	-14.2267	-22.3389	beta
human3_lib1.final_cell_0880	42.8012	2.83682	beta
human1_lib3.final_cell_0644	1.80676	9.32717	beta
human3_lib2.final_cell_0590	-46.3426	-14.4801	alpha
human2_lib2.final_cell_0458	24.8693	-14.4103	beta
human2_lib2.final_cell_0406	-12.4305	46.4141	alpha
human1_lib2.final_cell_0236	13.5031	16.8309	beta
human3_lib1.final_cell_0151	57.8869	9.52421	beta
human3_lib3.final_cell_0407	-32.9826	-52.366	ductal
human1_lib3.final_cell_0473	-58.1935	28.788	alpha
human3_lib1.final_cell_0239	-41.7612	-8.76781	alpha
human3_lib2.final_cell_0144	60.1082	0.803249	beta
human1_lib1.final_cell_0416	11.8354	61.8467	beta
human3_lib4.final_cell_0113	46.4251	-49.6746	acinar
human1_lib3.final_cell_0397	-48.9573	37.9636	alpha
human2_lib1.final_cell_0281	-11.6377	-56.1877	ductal
human2_lib3.final_cell_0446	11.7072	-15.1348	beta
human1_lib1.final_cell_0349	21.3352	4.54697	beta
human3_lib4.final_cell_0170	54.5404	-45.3597	acinar
human4_lib3.final_cell_0557	1.77425	-20.501	beta
human2_lib3.final_cell_0503	-17.2195	30.6042	alpha
human3_lib3.final_cell_0810	20.3984	51.34	delta
human3_lib1.final_cell_0170	53.4092	-46.3617	acinar
human3_lib1.final_cell_0701	-47.4107	-15.3387	alpha
human4_lib3.final_cell_0529	-80.5543	13.4617	gamma
human3_lib3.final_cell_0032	-44.9553	-8.97615	alpha
human3_lib3.final_cell_0060	39.6606	-58.1179	acinar
human3_lib4.final_cell_0075	36.3961	-48.9603	acinar
human1_lib3.final_cell_0142	18.4082	12.6403	beta
human3_lib3.final_cell_0692	-50.7706	8.17933	alpha
human3_lib2.final_cell_0274	-39.1378	-50.3571	ductal
human1_lib2.final_cell_0358	13.9554	12.5615	beta
human3_lib3.final_cell_0019	56.238	-35.3632	acinar
human3_lib1.final_cell_0807	-22.1906	5.0452	alpha
human4_lib3.final_cell_0367	-6.41861	-10.8964	beta
human2_lib2.final_cell_0537	-8.71407	44.2402	alpha
human1_lib3.final_cell_0269	-56.0769	34.3873	alpha
human4_lib3.final_cell_0474	-35.2125	52.8388	alpha
human1_lib3.final_cell_0175	15.8656	22.7005	beta
human2_lib2.final_cell_0336	22.5544	-23.4306	beta
human3_lib2.final_cell_0168	41.8582	-59.4408	acinar
human4_lib3.final_cell_0601	0.312905	-30.7416	beta
human1_lib2.final_cell_0115	13.7614	15.5751	beta
human3_lib1.final_cell_0017	49.6737	-54.939	acinar
human3_lib2.final_cell_0070	26.0793	60.0365	delta
human3_lib1.final_cell_0186	-41.8605	-6.44463	alpha
human3_lib1.final_cell_0229	-38.4814	4.30842	alpha
human3_lib1.final_cell_0564	-39.9222	-48.2752	ductal
human4_lib1.final_cell_0110	-6.16485	-23.0356	beta
human1_lib2.final_cell_0029	15.5946	14.3284	beta
human3_lib3.final_cell_0382	-37.7043	-50.2931	ductal
human3_lib4.final_cell_0548	33.3546	-47.8982	acinar
human4_lib3.final_cell_0334	-13.6053	-22.0151	beta
human3_lib2.final_cell_0483	-52.9274	-13.2001	alpha
human3_lib3.final_cell_0404	-38.1284	-4.49896	alpha
human3_lib1.final_cell_0394	59.8843	3.52074	beta
human3_lib3.final_cell_0070	48.2722	-51.4047	acinar
human3_lib3.final_cell_0743	-35.8289	-59.33	ductal
human1_lib1.final_cell_0031	7.02407	57.2933	delta
human3_lib2.final_cell_0043	38.2265	-54.1822	acinar
human2_lib3.final_cell_0410	20.838	70.9941	delta
human4_lib3.final_cell_0485	-39.2615	51.865	alpha
human3_lib4.final_cell_0230	20.8337	57.8385	delta
human3_lib1.final_cell_0770	-45.5294	19.8137	beta
human2_lib1.final_cell_0105	10.2529	-16.2638	beta
human3_lib4.final_cell_0107	-56.773	-10.8273	alpha
human1_lib2.final_cell_0304	-46.9268	35.8005	alpha
human1_lib3.final_cell_0196	7.84611	14.8986	beta
human1_lib3.final_cell_0668	-50.7692	27.1705	alpha
human4_lib3.final_cell_0634	-5.69753	-11.0776	beta
human3_lib3.final_cell_0087	56.1084	13.6562	beta
human1_lib2.final_cell_0549	-76.0195	8.19547	gamma
human2_lib1.final_cell_0277	-14.428	41.2296	alpha
human4_lib3.final_cell_0263	-19.882	-50.8196	ductal
human2_lib1.final_cell_0470	-83.5611	2.97904	gamma
human3_lib2.final_cell_0783	-48.4321	13.6356	alpha
human4_lib1.final_cell_0280	-7.25782	-29.1023	beta
human1_lib2.final_cell_0261	-52.5453	30.4765	alpha
human3_lib3.final_cell_0780	43.8503	-2.35896	beta
human3_lib1.final_cell_0026	51.5391	-44.6486	acinar
human3_lib2.final_cell_0101	38.6093	-56.9643	acinar
human3_lib3.final_cell_0047	48.2913	-53.489	acinar
human4_lib3.final_cell_0679	-8.58007	-71.2364	ductal
human1_lib1.final_cell_0532	58.6043	50.8676	endothelial
human4_lib3.final_cell_0038	9.94128	-61.1058	ductal
human3_lib1.final_cell_0510	-49.0089	-8.09493	alpha
human2_lib3.final_cell_0554	25.5381	-6.72499	beta
human3_lib2.final_cell_0379	-36.498	-49.0788	ductal
human2_lib2.final_cell_0197	9.2606	-59.9156	ductal
human2_lib3.final_cell_0342	-82.5516	4.32579	gamma
human1_lib2.final_cell_0384	15.5293	19.661	beta
human1_lib2.final_cell_0003	6.41923	62.8891	delta
human4_lib3.final_cell_0005	17.402	-54.9115	ductal
human1_lib3.final_cell_0540	8.7465	47.1418	delta
human3_lib2.final_cell_0470	-42.5787	4.04734	alpha
human1_lib2.final_cell_0474	-75.3181	9.43674	gamma
human3_lib4.final_cell_0370	-36.9164	-1.70944	alpha
human2_lib3.final_cell_0111	-12.5062	-54.2991	ductal
human2_lib3.final_cell_0512	-6.08793	-61.4075	ductal
human3_lib1.final_cell_0769	-21.1889	8.70389	alpha
human3_lib3.final_cell_0781	24.093	53.3808	delta
human3_lib1.final_cell_0304	62.2087	16.7667	beta
human1_lib1.final_cell_0115	11.3081	16.5823	beta
human1_lib3.final_cell_0429	55.7154	46.9721	endothelial
human1_lib2.final_cell_0305	27.9638	19.3043	beta
human3_lib3.final_cell_0412	52.3196	12.3638	beta
human1_lib2.final_cell_0099	3.12164	59.1021	delta
human3_lib2.final_cell_0389	-32.2628	-8.35763	alpha
human3_lib4.final_cell_0471	-59.1666	-5.81764	alpha
human4_lib3.final_cell_0475	-12.8093	-66.8401	ductal
human3_lib4.final_cell_0436	-34.4924	5.99431	alpha
human3_lib1.final_cell_0482	28.3014	58.9715	delta
human3_lib1.final_cell_0412	40.9396	14.7206	beta
human1_lib1.final_cell_0239	10.249	13.7341	beta
human1_lib3.final_cell_0328	-31.3322	-60.5574	ductal
human4_lib3.final_cell_0561	-38.183	49.1828	alpha
human2_lib1.final_cell_0231	16.8944	-21.2087	beta
human2_lib2.final_cell_0060	-9.61571	43.0713	alpha
human3_lib1.final_cell_0506	-44.3502	0.15848	alpha
human3_lib2.final_cell_0146	59.7522	7.12591	beta
human2_lib2.final_cell_0193	-8.24205	-57.8009	ductal
human2_lib3.final_cell_0081	9.01789	-57.4772	ductal
human2_lib2.final_cell_0268	-13.5999	47.1164	alpha
human2_lib2.final_cell_0592	25.096	-7.3552	beta
human3_lib3.final_cell_0893	42.2229	-5.85497	beta
human4_lib1.final_cell_0356	1.95498	-24.0432	beta
human3_lib1.final_cell_0693	-40.7131	12.437	alpha
human1_lib1.final_cell_0018	30.3801	-39.3596	acinar
human4_lib3.final_cell_0583	-8.16978	-21.4155	beta
human3_lib1.final_cell_0073	29.2684	-57.1786	acinar
human4_lib3.final_cell_0338	-4.79762	-9.91299	beta
human4_lib3.final_cell_0071	15.8902	-55.8858	ductal
human2_lib1.final_cell_0440	-14.7366	44.123	alpha
human4_lib1.final_cell_0200	6.41502	73.6095	delta
human2_lib1.final_cell_0434	-10.2767	-57.0546	ductal
human1_lib2.final_cell_0398	20.3417	3.93057	beta
human3_lib3.final_cell_0023	43.4756	-44.5941	acinar
human1_lib1.final_cell_0173	31.3701	-33.2538	acinar
human1_lib3.final_cell_0232	3.44879	66.821	delta
human4_lib3.final_cell_0457	-14.6378	-21.9749	beta
human2_lib1.final_cell_0499	-17.3273	28.8428	alpha
human1_lib1.final_cell_0484	-77.7395	11.076	gamma
human3_lib3.final_cell_0305	24.2624	56.4148	delta
human1_lib1.final_cell_0521	-76.0041	8.0887	gamma
human1_lib1.final_cell_0037	6.76636	22.8378	beta
human3_lib3.final_cell_0918	39.7393	1.61851	beta
human4_lib3.final_cell_0509	-41.5426	52.5626	alpha
human3_lib2.final_cell_0538	-31.279	-45.7338	ductal
human3_lib4.final_cell_0235	19.7861	59.0722	delta
human4_lib1.final_cell_0289	-45.1667	48.1066	alpha
human3_lib3.final_cell_0678	-47.8656	12.831	alpha
human2_lib1.final_cell_0141	11.4004	-16.8815	beta
human3_lib3.final_cell_0243	50.8524	-40.5901	acinar
human2_lib2.final_cell_0059	-15.8352	47.4568	alpha
human1_lib2.final_cell_0588	23.6654	0.176227	beta
human3_lib2.final_cell_0307	-33.1769	-7.70318	alpha
human3_lib1.final_cell_0407	-53.0373	-9.41297	alpha
human1_lib2.final_cell_0478	-1.97802	-56.2413	ductal
human2_lib2.final_cell_0280	-8.769	-56.5293	ductal
human3_lib3.final_cell_0136	49.6715	14.5139	beta
human3_lib4.final_cell_0175	52.3688	-47.1658	acinar
human1_lib2.final_cell_0516	33.3795	19.9852	beta
human3_lib4.final_cell_0496	-51.8197	-3.86794	alpha
human3_lib2.final_cell_0598	-52.3282	0.249931	alpha
human2_lib3.final_cell_0235	16.1314	-20.0255	beta
human3_lib2.final_cell_0056	35.3278	-55.9465	acinar
human4_lib3.final_cell_0429	-1.18802	-18.3872	beta
human3_lib2.final_cell_0055	55.8439	-45.2254	acinar
human2_lib1.final_cell_0124	10.0844	41.9426	beta
human3_lib4.final_cell_0617	60.4033	8.75557	beta
human1_lib1.final_cell_0377	10.3093	48.4062	delta
human3_lib3.final_cell_0764	-52.2265	-6.55652	alpha
human1_lib2.final_cell_0306	14.2689	16.3447	beta
human3_lib4.final_cell_0103	53.5364	-46.9059	acinar
human3_lib4.final_cell_0507	-36.8009	-44.435	ductal
human4_lib3.final_cell_0631	-2.68237	-16.7766	beta
human3_lib2.final_cell_0033	43.8574	-48.639	acinar
human4_lib3.final_cell_0258	-5.63968	-17.6461	beta
human4_lib1.final_cell_0252	16.2655	-50.9398	ductal
human2_lib1.final_cell_0214	-16.3544	42.8325	alpha
human1_lib2.final_cell_0040	9.19793	60.4244	delta
human3_lib3.final_cell_0472	-45.4342	2.65711	alpha
human3_lib2.final_cell_0782	-24.9955	-42.9888	ductal
human4_lib3.final_cell_0620	-37.9454	58.0671	alpha
human1_lib3.final_cell_0536	-53.4621	35.1994	alpha
human3_lib4.final_cell_0644	42.1488	15.4758	beta
human2_lib1.final_cell_0227	16.688	-20.5957	beta
human4_lib1.final_cell_0412	-10.2055	-14.2158	beta
human4_lib3.final_cell_0564	-8.54729	-21.4896	beta
human4_lib1.final_cell_0557	-2.04306	-12.3432	beta
human1_lib2.final_cell_0470	56.2932	47.8432	endothelial
human3_lib1.final_cell_0077	48.9073	-46.9814	acinar
human3_lib1.final_cell_0419	50.003	-39.1471	acinar
human1_lib2.final_cell_0258	12.0796	59.7592	delta
human1_lib2.final_cell_0289	31.2636	27.5156	beta
human3_lib2.final_cell_0196	65.674	6.78154	beta
human2_lib2.final_cell_0032	8.13829	-57.2469	ductal
human3_lib2.final_cell_0722	-47.0349	15.2848	alpha
human2_lib2.final_cell_0501	-17.1057	-49.5582	ductal
human4_lib1.final_cell_0272	-0.748509	-27.7644	beta
human3_lib3.final_cell_0340	61.3841	16.9609	beta
human1_lib3.final_cell_0231	32.3817	-34.8979	acinar
human1_lib3.final_cell_0472	-2.08008	15.1696	beta
human2_lib2.final_cell_0233	10.7281	-54.2585	ductal
human3_lib1.final_cell_0512	-73.6979	3.77525	gamma
human1_lib2.final_cell_0351	-56.7848	28.2723	alpha
human3_lib4.final_cell_0441	-41.5039	-10.5473	alpha
human1_lib1.final_cell_0453	31.2663	-33.1385	acinar
human3_lib4.final_cell_0358	57.9248	-37.0043	acinar
human3_lib2.final_cell_0003	45.9821	-47.2143	acinar
human4_lib1.final_cell_0413	-8.51903	-69.4524	ductal
human4_lib1.final_cell_0593	-34.4976	49.2838	alpha
human1_lib1.final_cell_0451	22.7851	1.33395	beta
human3_lib2.final_cell_0425	-28.6341	-14.33	alpha
human4_lib3.final_cell_0691	-16.2145	-18.8062	beta
human4_lib1.final_cell_0571	8.14466	76.6224	delta
human3_lib4.final_cell_0095	62.8548	10.4845	beta
human3_lib4.final_cell_0342	30.2706	-49.9414	acinar
human2_lib2.final_cell_0203	23.4661	-19.9896	beta
human4_lib3.final_cell_0232	-9.71439	-21.9502	beta
human2_lib1.final_cell_0192	-5.58019	-56.2885	ductal
human1_lib1.final_cell_0283	6.73653	10.0362	beta
human3_lib3.final_cell_0266	29.96	-51.6656	acinar
human2_lib1.final_cell_0514	17.8415	-18.047	beta
human3_lib1.final_cell_0461	-42.7265	-8.3959	alpha
human3_lib4.final_cell_0692	26.3583	58.6756	delta
human3_lib1.final_cell_0869	37.8497	-5.82821	beta
human3_lib2.final_cell_0638	45.7873	-33.5207	acinar
human2_lib1.final_cell_0015	-20.829	48.0213	alpha
human1_lib2.final_cell_0015	9.7886	62.1805	delta
human3_lib3.final_cell_0738	46.755	-32.006	acinar
human2_lib1.final_cell_0157	-26.4332	37.4281	alpha
human1_lib3.final_cell_0329	6.58643	64.6261	delta
human3_lib3.final_cell_0650	-47.1861	-7.3175	alpha
human3_lib3.final_cell_0688	-37.615	-1.98707	alpha
human2_lib2.final_cell_0259	-12.437	44.8961	alpha
human3_lib1.final_cell_0857	-32.4234	-44.5372	ductal
human3_lib4.final_cell_0588	40.8395	1.28269	beta
human3_lib2.final_cell_0659	54.8545	40.7651	endothelial
human3_lib3.final_cell_0498	-57.6868	-8.0105	alpha
human3_lib1.final_cell_0828	-47.6437	0.124195	alpha
human2_lib1.final_cell_0020	-25.4406	38.5539	alpha
human2_lib1.final_cell_0085	-17.3175	47.3286	alpha
human1_lib2.final_cell_0551	14.2945	7.12397	beta
human1_lib1.final_cell_0162	5.10038	14.237	beta
human1_lib3.final_cell_0123	-56.8111	33.3396	alpha
human1_lib1.final_cell_0458	-50.1875	38.2353	alpha
human3_lib1.final_cell_0867	40.4499	-6.90534	beta
human2_lib3.final_cell_0028	9.64328	-59.0308	ductal
human2_lib2.final_cell_0207	-9.06983	-55.1905	ductal
human2_lib3.final_cell_0080	-13.6197	-52.2474	ductal
human2_lib2.final_cell_0227	-9.05496	47.8093	alpha
human3_lib4.final_cell_0679	60.1361	8.70443	beta
human3_lib4.final_cell_0473	55.7139	16.1852	beta
human1_lib2.final_cell_0498	10.2045	61.4828	delta
human3_lib3.final_cell_0157	47.2174	-35.2653	acinar
human2_lib2.final_cell_0533	-18.9851	32.161	alpha
human3_lib4.final_cell_0354	61.1663	6.28239	beta
human2_lib3.final_cell_0321	-21.5271	36.3949	alpha
human2_lib2.final_cell_0276	-7.86145	40.2675	alpha
human2_lib3.final_cell_0260	19.3481	69.5475	delta
human3_lib2.final_cell_0244	42.6276	14.2801	beta
human4_lib1.final_cell_0214	-46.4651	51.2402	alpha
human3_lib3.final_cell_0278	-36.6292	-47.2	ductal
human1_lib3.final_cell_0525	0.817492	16.0291	beta
human2_lib3.final_cell_0200	13.9656	-8.39932	beta
human2_lib1.final_cell_0398	-85.6962	5.32614	gamma
human3_lib1.final_cell_0645	-45.4172	-13.1383	alpha
human3_lib3.final_cell_0687	64.4279	8.62182	beta
human2_lib1.final_cell_0273	17.1602	-25.5453	beta
human2_lib1.final_cell_0078	7.04218	-59.7116	ductal
human3_lib1.final_cell_0055	44.7245	-48.8015	acinar
human2_lib3.final_cell_0543	42.8542	11.0209	beta
human3_lib1.final_cell_0594	-38.3878	-46.8698	ductal
human1_lib1.final_cell_0193	5.69257	5.46091	beta
human2_lib2.final_cell_0560	25.2174	-5.33162	beta
human2_lib3.final_cell_0109	17.7663	-19.7237	beta
human1_lib3.final_cell_0051	21.9737	20.9679	beta
human2_lib2.final_cell_0241	14.1666	-18.6971	beta
human4_lib3.final_cell_0414	-1.51458	-19.2446	beta
human3_lib3.final_cell_0271	-36.7165	-46.5658	ductal
human4_lib1.final_cell_0504	-5.78002	-18.5154	beta
human1_lib3.final_cell_0028	4.28794	65.417	delta
human1_lib2.final_cell_0395	33.8342	-32.5492	acinar
human3_lib4.final_cell_0171	50.7114	-32.3018	acinar
human3_lib2.final_cell_0004	46.082	-47.2226	acinar
human4_lib3.final_cell_0224	7.16415	71.9607	delta
human2_lib1.final_cell_0290	19.1587	-13.2358	beta
human1_lib3.final_cell_0737	22.5872	0.464603	beta
human4_lib1.final_cell_0386	-41.6399	50.3655	alpha
human1_lib3.final_cell_0010	2.76589	65.0059	delta
human3_lib1.final_cell_0699	-40.6164	-4.98958	alpha
human1_lib2.final_cell_0356	12.5085	11.9786	beta
human3_lib4.final_cell_0163	46.906	13.4771	beta
human3_lib1.final_cell_0286	-41.8391	3.24627	alpha
human1_lib2.final_cell_0282	5.76477	7.30126	beta
human4_lib1.final_cell_0541	-45.5525	54.3139	alpha
human2_lib1.final_cell_0022	-15.527	41.5762	alpha
human2_lib2.final_cell_0422	-12.7362	48.1914	alpha
human1_lib2.final_cell_0452	57.4004	48.0473	endothelial
human2_lib2.final_cell_0226	-17.6414	-50.4502	ductal
human3_lib1.final_cell_0128	22.3956	55.3621	delta
human3_lib2.final_cell_0158	52.56	-51.9773	acinar
human2_lib1.final_cell_0538	26.604	-2.87931	beta
human3_lib2.final_cell_0426	55.6286	-36.1434	acinar
human3_lib4.final_cell_0263	45.1247	-5.29838	beta
human1_lib1.final_cell_0191	-53.6011	38.0423	alpha
human4_lib3.final_cell_0470	-14.9765	-24.412	beta
human2_lib1.final_cell_0282	17.1912	-13.7897	beta
human3_lib2.final_cell_0556	-46.9218	17.6349	alpha
human4_lib3.final_cell_0174	7.36897	73.679	delta
human1_lib2.final_cell_0464	7.67492	3.42767	beta
human1_lib1.final_cell_0250	57.3562	46.6584	endothelial
human4_lib1.final_cell_0318	10.3707	76.7927	delta
human1_lib1.final_cell_0369	32.1495	24.1866	beta
human1_lib1.final_cell_0190	-0.221909	14.8341	beta
human1_lib1.final_cell_0391	27.5335	17.9193	beta
human1_lib3.final_cell_0653	20.4781	1.93109	beta
human3_lib2.final_cell_0375	-35.9982	-48.2097	ductal
human3_lib2.final_cell_0227	-27.3357	-35.0932	ductal
human3_lib4.final_cell_0695	-37.26	-59.2846	ductal
human3_lib2.final_cell_0233	56.5227	10.0757	beta
human1_lib3.final_cell_0630	8.45624	57.4862	delta
human3_lib1.final_cell_0589	-45.529	4.77557	alpha
human3_lib4.final_cell_0245	-28.1977	-13.6804	alpha
human3_lib3.final_cell_0604	48.9797	7.65987	beta
human3_lib2.final_cell_0135	36.464	-56.229	acinar
human3_lib4.final_cell_0592	-44.0178	-3.68009	alpha
human3_lib3.final_cell_0466	45.6027	-5.68957	beta
human1_lib2.final_cell_0020	9.57383	60.4647	delta
human3_lib4.final_cell_0048	42.4583	-45.7139	acinar
human3_lib1.final_cell_0218	54.3906	10.1065	beta
human3_lib2.final_cell_0523	46.3772	-9.35307	beta
human3_lib3.final_cell_0713	-54.0419	-2.01478	alpha
human3_lib4.final_cell_0226	47.6373	15.2928	beta
human2_lib1.final_cell_0254	14.9006	-8.5008	beta
human2_lib3.final_cell_0172	20.4061	71.7055	delta
human4_lib1.final_cell_0134	13.5739	-52.1823	ductal
human3_lib2.final_cell_0304	50.9101	7.02746	beta
human3_lib1.final_cell_0865	38.3058	-5.11826	beta
human4_lib1.final_cell_0526	-8.23114	-65.6974	ductal
human3_lib3.final_cell_0750	-50.3506	-13.589	alpha
human2_lib3.final_cell_0089	15.2895	-24.0101	beta
human3_lib3.final_cell_0627	-55.0051	-8.26843	alpha
human4_lib1.final_cell_0236	1.55286	-19.8145	beta
human2_lib1.final_cell_0513	23.2449	-15.013	beta
human3_lib2.final_cell_0206	56.3509	-13.4386	beta
human3_lib1.final_cell_0075	24.9983	55.1489	delta
human2_lib3.final_cell_0056	-21.4412	37.8673	alpha
human3_lib1.final_cell_0641	-46.1457	18.3275	alpha
human2_lib3.final_cell_0203	-21.6893	34.4258	alpha
human4_lib1.final_cell_0158	-14.9526	-72.1414	ductal
human4_lib1.final_cell_0395	-80.6916	15.3852	gamma
human3_lib4.final_cell_0776	-25.8468	7.43346	alpha
human3_lib2.final_cell_0221	-49.6176	0.290326	alpha
human3_lib1.final_cell_0318	-47.8259	-6.52603	alpha
human4_lib1.final_cell_0204	5.03191	76.7813	delta
human1_lib3.final_cell_0426	-55.9292	26.96	alpha
human3_lib2.final_cell_0143	-33.8613	-45.9512	ductal
human1_lib2.final_cell_0017	10.9243	18.2207	beta
human4_lib3.final_cell_0628	-26.491	-42.8931	ductal
human1_lib1.final_cell_0477	-20.3254	-61.5647	ductal
human4_lib3.final_cell_0481	4.18406	70.23	delta
human3_lib2.final_cell_0460	-36.3242	-58.681	ductal
human1_lib2.final_cell_0425	56.6074	47.3172	endothelial
human3_lib1.final_cell_0269	50.8413	13.3151	beta
human4_lib1.final_cell_0438	-19.7032	-65.4308	ductal
human3_lib3.final_cell_0114	-52.7263	-15.2149	alpha
human3_lib4.final_cell_0510	-39.8777	-3.2955	alpha
human3_lib4.final_cell_0120	43.5555	-57.6354	acinar
human1_lib1.final_cell_0060	31.2477	27.0548	beta
human3_lib3.final_cell_0021	35.6752	-59.1302	acinar
human3_lib1.final_cell_0766	36.3975	11.904	beta
human3_lib1.final_cell_0732	54.8173	-36.9376	acinar
human1_lib1.final_cell_0343	33.9933	-33.1904	acinar
human1_lib1.final_cell_0070	-57.5637	32.1339	alpha
human3_lib2.final_cell_0226	48.9513	-53.5775	acinar
human3_lib3.final_cell_0643	-46.1684	-10.3999	alpha
human1_lib2.final_cell_0213	23.134	20.4105	beta
human1_lib2.final_cell_0057	18.3952	13.8931	beta
human1_lib1.final_cell_0266	1.94276	9.43949	beta
human3_lib4.final_cell_0889	36.3028	-4.29321	beta
human1_lib3.final_cell_0576	-49.3009	35.099	alpha
human3_lib2.final_cell_0707	-53.207	-15.0907	alpha
human2_lib1.final_cell_0516	23.1431	-14.7909	beta
human2_lib3.final_cell_0058	10.3112	-59.4443	ductal
human1_lib3.final_cell_0145	4.82796	19.1802	beta
human3_lib1.final_cell_0370	-34.6317	-9.2941	alpha
human3_lib1.final_cell_0574	-40.9675	8.88236	alpha
human3_lib1.final_cell_0754	53.1762	40.5054	endothelial
human3_lib1.final_cell_0025	46.8417	-50.81	acinar
human2_lib3.final_cell_0448	-9.4238	-59.482	ductal
human2_lib3.final_cell_0391	-17.7991	38.6159	alpha
human2_lib1.final_cell_0066	-18.418	40.122	alpha
human2_lib2.final_cell_0536	-15.526	-50.1719	ductal
human2_lib2.final_cell_0453	-84.3169	1.76105	gamma
human1_lib2.final_cell_0596	59.901	52.9555	endothelial
human1_lib3.final_cell_0652	8.81196	2.46081	beta
human2_lib1.final_cell_0232	-9.85761	-58.8788	ductal
human3_lib3.final_cell_0379	23.0311	56.6991	delta
human3_lib1.final_cell_0127	-41.7118	6.79843	alpha
human2_lib1.final_cell_0201	17.9631	-21.0213	beta
human3_lib1.final_cell_0175	52.0746	7.48231	beta
human3_lib4.final_cell_0877	41.1341	-1.09485	beta
human1_lib3.final_cell_0315	1.58892	40.1764	alpha
human2_lib1.final_cell_0080	10.8715	-16.3624	beta
human3_lib2.final_cell_0029	55.8882	-46.4394	acinar
human3_lib1.final_cell_0006	33.7668	-60.0487	acinar
human3_lib4.final_cell_0121	-35.014	-38.0208	ductal
human1_lib2.final_cell_0008	4.25109	59.6274	delta
human4_lib3.final_cell_0011	-10.4216	-64.7615	ductal
human1_lib1.final_cell_0005	29.0943	-39.1694	acinar
human3_lib2.final_cell_0864	39.7415	-3.12239	beta
human3_lib1.final_cell_0648	-40.9822	-46.9336	ductal
human3_lib2.final_cell_0693	-37.7141	-45.1447	ductal
human3_lib4.final_cell_0586	59.3452	10.6965	beta
human3_lib2.final_cell_0479	-75.4696	4.08691	alpha
human3_lib4.final_cell_0038	40.6864	-54.1047	acinar
human2_lib1.final_cell_0380	6.67587	-59.9318	ductal
human3_lib4.final_cell_0645	47.6277	11.0892	beta
human2_lib1.final_cell_0550	-13.1943	-48.3412	ductal
human3_lib4.final_cell_0837	-35.1659	-58.8267	ductal
human3_lib4.final_cell_0687	-26.3694	-10.5802	alpha
human3_lib1.final_cell_0658	-43.3289	-12.8416	alpha
human1_lib3.final_cell_0254	2.46492	13.8367	beta
human3_lib1.final_cell_0570	21.0616	52.9997	delta
human1_lib3.final_cell_0332	29.5135	27.4485	beta
human1_lib1.final_cell_0353	9.47904	44.105	beta
human3_lib3.final_cell_0214	30.0305	-59.2301	acinar
human3_lib2.final_cell_0870	47.885	39.4063	endothelial
human1_lib3.final_cell_0135	6.88871	65.8698	delta
human3_lib1.final_cell_0584	19.1882	59.3752	delta
human4_lib1.final_cell_0089	-3.07487	-24.1003	beta
human1_lib2.final_cell_0176	0.366666	18.7362	beta
human2_lib3.final_cell_0025	11.7701	-20.9785	beta
human4_lib1.final_cell_0296	-44.6787	53.1282	alpha
human3_lib4.final_cell_0763	-50.2277	-17.6988	alpha
human4_lib1.final_cell_0418	0.617661	-19.8915	beta
human1_lib1.final_cell_0547	21.0543	1.33814	beta
human4_lib3.final_cell_0252	-14.642	-70.8449	ductal
human3_lib4.final_cell_0053	52.3348	-53.0338	acinar
human2_lib1.final_cell_0391	-12.8682	-53.9559	ductal
human3_lib3.final_cell_0769	-43.2642	-1.21813	alpha
human1_lib1.final_cell_0097	10.3548	22.5024	beta
human3_lib2.final_cell_0279	46.726	14.3059	beta
human3_lib4.final_cell_0057	52.2136	-39.23	acinar
human1_lib3.final_cell_0553	29.9621	19.8145	beta
human3_lib1.final_cell_0884	49.9149	38.6967	endothelial
human3_lib4.final_cell_0569	-31.4695	-0.964175	alpha
human1_lib3.final_cell_0052	14.5402	22.4728	beta
human1_lib3.final_cell_0542	23.6761	1.43842	beta
human3_lib2.final_cell_0544	51.0539	42.0742	endothelial
human3_lib2.final_cell_0085	53.5124	19.2116	beta
human4_lib3.final_cell_0593	-3.54073	-12.3341	beta
human2_lib2.final_cell_0523	-10.3077	-54.6039	ductal
human3_lib3.final_cell_0755	-33.9376	7.82964	alpha
human2_lib1.final_cell_0465	-24.726	43.462	alpha
human1_lib2.final_cell_0076	-1.25237	15.159	beta
human3_lib1.final_cell_0368	-49.5921	-15.3613	alpha
human3_lib4.final_cell_0463	44.8426	-5.07816	beta
human3_lib4.final_cell_0772	-46.0322	19.1673	alpha
human4_lib1.final_cell_0277	-0.796959	-25.3591	beta
human2_lib1.final_cell_0367	-21.42	38.8672	alpha
human4_lib1.final_cell_0135	-4.39861	-30.5216	beta
human3_lib3.final_cell_0193	54.5132	11.485	beta
human1_lib2.final_cell_0366	7.07026	60.5171	delta
human3_lib4.final_cell_0755	-47.5721	17.2182	alpha
human3_lib3.final_cell_0563	24.6747	54.5547	delta
human1_lib3.final_cell_0017	7.03938	64.1313	delta
human4_lib1.final_cell_0111	-16.6946	-70.4149	ductal
human1_lib3.final_cell_0440	3.49776	13.3582	beta
human2_lib1.final_cell_0206	17.7092	-23.9664	beta
human2_lib3.final_cell_0193	-23.1487	36.4037	alpha
human3_lib4.final_cell_0482	42.2954	-9.45341	beta
human1_lib3.final_cell_0256	8.28412	17.192	beta
human4_lib3.final_cell_0585	-0.809543	-22.5542	beta
human4_lib3.final_cell_0605	29.6383	18.7607	beta
human3_lib1.final_cell_0617	-45.6006	1.88402	alpha
human4_lib1.final_cell_0477	-41.0084	46.5336	alpha
human1_lib2.final_cell_0429	8.64462	6.34771	beta
human2_lib1.final_cell_0007	16.7766	66.5321	delta
human3_lib4.final_cell_0417	-46.8103	1.99668	alpha
human3_lib1.final_cell_0427	-51.6208	-0.395252	alpha
human1_lib3.final_cell_0336	2.36482	5.61955	beta
human4_lib3.final_cell_0504	-42.6035	56.6049	alpha
human3_lib2.final_cell_0780	-43.2306	-17.8933	alpha
human3_lib1.final_cell_0016	53.7914	-39.688	acinar
human4_lib3.final_cell_0024	-7.3872	-29.0248	beta
human2_lib3.final_cell_0134	17.2156	-20.3707	beta
human3_lib3.final_cell_0218	44.1925	15.8979	beta
human3_lib1.final_cell_0664	-42.86	-3.46097	alpha
human3_lib4.final_cell_0292	55.8316	-45.9285	acinar
human1_lib2.final_cell_0280	8.13839	11.1452	beta
human1_lib3.final_cell_0246	-23.3826	-63.6015	ductal
human1_lib1.final_cell_0334	-57.6369	28.9922	alpha
human1_lib2.final_cell_0123	9.34334	43.8794	beta
human2_lib3.final_cell_0103	11.0081	-59.1955	ductal
human3_lib2.final_cell_0765	21.1184	53.0044	delta
human4_lib1.final_cell_0050	-46.6425	48.5191	alpha
human2_lib2.final_cell_0168	-24.8642	40.2701	alpha
human1_lib1.final_cell_0290	3.01927	12.6813	beta
human2_lib1.final_cell_0435	10.7924	48.3248	delta
human4_lib3.final_cell_0281	-44.5244	45.4078	alpha
human4_lib3.final_cell_0667	-3.5369	-13.4629	beta
human1_lib3.final_cell_0410	8.88868	21.0593	beta
human1_lib1.final_cell_0481	10.1678	58.7786	delta
human3_lib1.final_cell_0816	21.1004	51.2504	delta
human2_lib2.final_cell_0176	-15.7546	50.6183	alpha
human4_lib3.final_cell_0394	-79.5744	14.3543	gamma
human2_lib1.final_cell_0168	-15.5361	43.0268	alpha
human1_lib1.final_cell_0447	24.707	42.0008	beta
human3_lib3.final_cell_0145	47.4138	-33.3769	acinar
human2_lib2.final_cell_0338	15.2209	-7.37721	beta
human4_lib1.final_cell_0601	-6.69173	-64.3617	ductal
human3_lib4.final_cell_0808	47.3251	6.89072	beta
human1_lib3.final_cell_0077	4.24339	62.4253	delta
human2_lib3.final_cell_0001	11.8662	-20.5978	beta
human3_lib1.final_cell_0843	-26.9467	8.21015	alpha
human3_lib2.final_cell_0853	38.385	1.42999	beta
human2_lib1.final_cell_0423	-9.51778	-60.2633	ductal
human4_lib3.final_cell_0454	-7.67029	-14.6663	beta
human3_lib1.final_cell_0553	61.0434	1.72614	beta
human1_lib1.final_cell_0550	22.2679	1.12967	beta
human2_lib3.final_cell_0494	-84.8792	5.10961	gamma
human3_lib4.final_cell_0486	-50.3177	-0.377073	alpha
human3_lib1.final_cell_0614	-24.8975	-45.8123	ductal
human3_lib1.final_cell_0864	49.9696	38.6992	endothelial
human3_lib3.final_cell_0633	-51.3577	-6.53073	alpha
human1_lib3.final_cell_0016	2.08314	63.1673	delta
human2_lib1.final_cell_0155	-11.7519	-55.5176	ductal
human2_lib2.final_cell_0128	-13.9961	43.8113	alpha
human2_lib2.final_cell_0073	21.7486	-24.9444	beta
human4_lib1.final_cell_0590	-6.79267	-64.3039	ductal
human1_lib1.final_cell_0281	6.90016	64.8229	delta
human4_lib1.final_cell_0422	-12.2311	-70.8929	ductal
human2_lib3.final_cell_0320	16.4145	-14.0697	beta
human3_lib4.final_cell_0460	-44.6291	-13.5843	alpha
human1_lib3.final_cell_0035	17.9877	22.8836	beta
human3_lib3.final_cell_0640	-30.465	-46.6146	ductal
human3_lib1.final_cell_0508	-38.3106	6.48245	alpha
human4_lib1.final_cell_0168	-45.5967	52.7751	alpha
human2_lib2.final_cell_0412	-20.0762	30.6029	alpha
human3_lib2.final_cell_0293	-27.8214	-34.8715	ductal
human3_lib1.final_cell_0103	-29.1209	-15.0061	alpha
human1_lib3.final_cell_0715	22.7202	-0.0596676	beta
human1_lib2.final_cell_0222	6.45671	7.11001	beta
human3_lib1.final_cell_0271	24.6435	60.7966	delta
human1_lib1.final_cell_0562	56.3796	52.4387	endothelial
human1_lib1.final_cell_0299	19.1494	12.5245	beta
human3_lib4.final_cell_0823	67.4683	7.83527	beta
human1_lib3.final_cell_0103	20.5853	22.0881	beta
human2_lib2.final_cell_0108	20.647	-24.3087	beta
human1_lib1.final_cell_0499	54.8796	49.4327	endothelial
human4_lib1.final_cell_0301	3.91941	73.4518	delta
human3_lib1.final_cell_0786	55.552	39.079	endothelial
human2_lib2.final_cell_0283	22.5277	70.7884	delta
human3_lib2.final_cell_0545	-55.5263	-12.8285	alpha
human3_lib3.final_cell_0208	54.9308	-50.0812	acinar
human3_lib1.final_cell_0775	36.5195	-4.07644	beta
human1_lib1.final_cell_0383	56.9267	47.9666	endothelial
human2_lib2.final_cell_0185	-84.6218	2.09671	gamma
human3_lib2.final_cell_0178	-56.4597	-3.3077	alpha
human3_lib2.final_cell_0487	-46.7236	-4.35737	alpha
human3_lib3.final_cell_0434	-44.6758	-10.9674	alpha
human3_lib2.final_cell_0081	50.2088	-51.4863	acinar
human2_lib2.final_cell_0361	-11.2062	-54.9987	ductal
human3_lib1.final_cell_0053	42.3673	-50.0903	acinar
human1_lib3.final_cell_0650	-34.1191	-62.6868	ductal
human1_lib2.final_cell_0325	23.2392	16.7965	beta
human2_lib2.final_cell_0451	-17.8199	28.9201	alpha
human2_lib3.final_cell_0472	-14.6767	36.3059	alpha
human1_lib2.final_cell_0506	16.3727	10.4024	beta
human4_lib1.final_cell_0275	-40.7677	53.7078	alpha
human2_lib1.final_cell_0145	17.5651	-23.7935	beta
human2_lib3.final_cell_0523	61.4488	46.9035	endothelial
human4_lib3.final_cell_0188	-37.1327	57.0591	alpha
human3_lib4.final_cell_0466	50.5977	-34.9981	acinar
human1_lib3.final_cell_0608	8.31625	3.5703	beta
human3_lib1.final_cell_0428	-32.5411	-9.16858	alpha
human2_lib1.final_cell_0450	-17.203	-48.7636	ductal
human3_lib4.final_cell_0190	54.7182	-48.2425	acinar
human2_lib3.final_cell_0130	-23.564	44.0313	alpha
human3_lib4.final_cell_0702	-36.6336	-6.40921	alpha
human1_lib3.final_cell_0001	34.0507	-34.77	acinar
human3_lib2.final_cell_0355	51.5361	15.7981	beta
human2_lib3.final_cell_0268	-22.0062	-46.2947	ductal
human1_lib2.final_cell_0329	7.96703	58.2848	delta
human1_lib1.final_cell_0019	-25.7063	-62.1027	ductal
human3_lib1.final_cell_0217	19.139	57.4993	delta
human2_lib3.final_cell_0348	-17.6614	49.3841	alpha
human2_lib2.final_cell_0360	-20.7947	33.649	alpha
human4_lib3.final_cell_0208	-81.6496	14.4096	gamma
human3_lib3.final_cell_0137	50.4415	12.0914	beta
human2_lib1.final_cell_0060	13.8542	69.567	delta
human2_lib3.final_cell_0272	17.0432	-19.2478	beta
human3_lib1.final_cell_0097	41.0177	-53.3106	acinar
human4_lib3.final_cell_0641	-39.6908	45.8143	alpha
human3_lib3.final_cell_0111	36.484	-57.6026	acinar
human1_lib3.final_cell_0107	9.32649	19.7503	beta
human1_lib1.final_cell_0475	10.0582	1.31115	beta
human1_lib3.final_cell_0593	21.3734	4.15925	beta
human3_lib2.final_cell_0419	45.6073	8.73835	beta
human3_lib2.final_cell_0015	51.9098	-44.2859	acinar
human2_lib3.final_cell_0535	-20.2536	22.0585	alpha
human2_lib1.final_cell_0199	-19.213	51.3505	alpha
human3_lib2.final_cell_0717	-41.8785	-3.32343	alpha
human1_lib1.final_cell_0568	20.2547	12.8272	beta
human3_lib1.final_cell_0300	59.3708	-38.2811	acinar
human2_lib1.final_cell_0327	-11.4232	-56.3377	ductal
human2_lib2.final_cell_0154	7.17555	-60.114	acinar
human1_lib2.final_cell_0582	30.0228	-33.6017	acinar
human4_lib1.final_cell_0234	3.92977	-22.5455	beta
human3_lib4.final_cell_0526	52.2172	11.5375	beta
human1_lib3.final_cell_0462	21.0926	19.7086	beta
human1_lib3.final_cell_0245	-58.1998	28.9419	alpha
human4_lib3.final_cell_0649	-35.0814	53.2527	alpha
human4_lib3.final_cell_0257	-2.562	-30.6327	beta
human2_lib3.final_cell_0229	-10.4283	-60.109	ductal
human3_lib3.final_cell_0634	48.5053	8.10568	beta
human3_lib3.final_cell_0401	57.4436	-0.0145526	beta
human3_lib3.final_cell_0792	-22.0006	7.60794	alpha
human4_lib3.final_cell_0006	14.8443	-54.2347	ductal
human1_lib3.final_cell_0400	8.72717	12.2408	beta
human2_lib1.final_cell_0276	-11.6761	-54.7284	ductal
human2_lib2.final_cell_0123	17.2535	-12.1726	beta
human2_lib1.final_cell_0409	-26.0141	29.3009	alpha
human3_lib2.final_cell_0552	-33.45	3.49919	alpha
human1_lib3.final_cell_0297	19.2939	23.3758	beta
human3_lib3.final_cell_0345	23.9551	58.388	delta
human2_lib2.final_cell_0213	13.8141	-17.6186	beta
human4_lib1.final_cell_0038	-9.54049	-18.3617	beta
human4_lib3.final_cell_0333	-40.3436	46.7505	alpha
human2_lib1.final_cell_0249	14.6228	-16.2035	beta
human2_lib1.final_cell_0181	10.253	-55.8284	ductal
human1_lib3.final_cell_0234	2.04034	14.8814	beta
human4_lib3.final_cell_0305	-2.19758	-24.6261	beta
human1_lib2.final_cell_0102	3.85301	59.9705	delta
human3_lib4.final_cell_0228	49.5247	-45.5534	acinar
human4_lib3.final_cell_0265	-12.8262	-72.9515	ductal
human2_lib1.final_cell_0492	-11.5096	36.4519	alpha
human3_lib2.final_cell_0594	43.2263	-8.45525	beta
human4_lib1.final_cell_0364	-11.7111	-65.4778	ductal
human1_lib2.final_cell_0181	13.1459	16.7105	beta
human1_lib2.final_cell_0262	-54.2348	32.3117	alpha
human3_lib1.final_cell_0852	45.392	1.22445	beta
human2_lib2.final_cell_0343	18.9329	-13.8751	beta
human1_lib1.final_cell_0454	-76.4647	11.603	gamma
human3_lib2.final_cell_0053	47.2784	-50.7861	acinar
human2_lib1.final_cell_0491	-12.6284	35.9115	alpha
human2_lib2.final_cell_0574	-14.4402	-49.7007	ductal
human2_lib1.final_cell_0405	20.4553	72.9861	beta
human3_lib1.final_cell_0200	51.3032	-32.2321	acinar
human3_lib4.final_cell_0783	48.1038	-31.1641	acinar
human3_lib1.final_cell_0338	-33.3559	-38.6611	ductal
human2_lib2.final_cell_0396	-9.2791	37.3839	alpha
human1_lib3.final_cell_0325	8.15762	15.3686	beta
human3_lib3.final_cell_0864	-35.8488	6.18582	alpha
human3_lib4.final_cell_0806	-40.5074	2.94203	alpha
human3_lib1.final_cell_0565	-36.3823	10.8757	alpha
human4_lib1.final_cell_0274	-12.2314	-24.5435	beta
human4_lib1.final_cell_0351	-11.0846	-67.7177	ductal
human2_lib3.final_cell_0216	-9.06456	44.2886	alpha
human3_lib4.final_cell_0785	-72.7849	2.60483	gamma
human1_lib3.final_cell_0171	29.0968	-37.3077	acinar
human1_lib1.final_cell_0431	-74.73	11.5024	gamma
human3_lib3.final_cell_0098	52.7624	-42.6827	acinar
human3_lib4.final_cell_0191	-25.3514	-37.5019	ductal
human3_lib2.final_cell_0607	-34.0925	-47.5752	ductal
human3_lib3.final_cell_0359	45.662	13.5912	beta
human1_lib3.final_cell_0023	10.3731	65.9034	delta
human2_lib1.final_cell_0205	-19.1282	-50.3086	ductal
human1_lib2.final_cell_0031	3.99138	56.2769	delta
human4_lib3.final_cell_0559	-42.2783	58.9221	alpha
human2_lib2.final_cell_0595	-20.7941	12.7237	alpha
human2_lib1.final_cell_0455	-14.51	34.3809	alpha
human3_lib1.final_cell_0209	46.7101	-51.7995	acinar
human4_lib3.final_cell_0680	9.23693	53.5883	delta
human3_lib3.final_cell_0786	51.5626	1.88424	beta
human4_lib1.final_cell_0429	-12.6906	-23.1601	beta
human4_lib3.final_cell_0700	-3.1176	-9.28187	beta
human4_lib3.final_cell_0149	-4.99394	-29.6662	beta
human1_lib3.final_cell_0197	-21.783	-64.085	ductal
human4_lib1.final_cell_0191	-38.8894	49.5461	alpha
human3_lib1.final_cell_0774	54.7938	38.4757	endothelial
human1_lib2.final_cell_0299	31.4633	20.2517	beta
human3_lib4.final_cell_0254	57.0576	2.00092	beta
human3_lib4.final_cell_0319	-40.1084	-10.1816	alpha
human3_lib4.final_cell_0041	33.7804	-59.9922	acinar
human2_lib3.final_cell_0259	-20.6224	51.1756	alpha
human3_lib4.final_cell_0001	44.8454	-51.9706	acinar
human1_lib2.final_cell_0581	-52.814	26.4121	alpha
human3_lib4.final_cell_0690	-31.3696	-40.4472	ductal
human4_lib3.final_cell_0440	-14.5908	-19.6383	beta
human4_lib1.final_cell_0328	-82.0944	14.3308	gamma
human1_lib2.final_cell_0143	8.16038	61.8252	delta
human3_lib4.final_cell_0866	38.6982	1.8758	beta
human1_lib3.final_cell_0360	-76.2019	12.1897	gamma
human1_lib3.final_cell_0235	-21.7211	-64.1163	ductal
human2_lib2.final_cell_0078	0.819249	-55.6959	ductal
human4_lib3.final_cell_0357	-8.44049	-19.7793	beta
human2_lib1.final_cell_0506	-19.9792	29.4438	alpha
human4_lib3.final_cell_0194	-9.93203	-68.047	ductal
human1_lib3.final_cell_0194	3.74723	13.9158	beta
human3_lib1.final_cell_0834	38.2755	-4.6882	beta
human4_lib1.final_cell_0523	-3.61484	-9.47435	beta
human1_lib3.final_cell_0027	13.8697	21.9852	beta
human2_lib1.final_cell_0477	-82.8257	4.04023	gamma
human1_lib1.final_cell_0065	16.8633	20.6871	ductal
human3_lib4.final_cell_0206	-34.7285	-7.60663	alpha
human3_lib3.final_cell_0544	-48.8069	-19.2961	alpha
human1_lib3.final_cell_0199	-55.9588	37.8666	alpha
human4_lib1.final_cell_0149	-11.4427	-66.4779	ductal
human3_lib3.final_cell_0317	-43.1976	-7.7525	alpha
human3_lib4.final_cell_0508	45.6715	-4.21767	beta
human3_lib3.final_cell_0541	-24.6829	-42.9862	ductal
human3_lib3.final_cell_0269	62.2241	11.9147	beta
human2_lib3.final_cell_0282	-26.591	39.6082	alpha
human3_lib1.final_cell_0234	53.7903	8.70927	beta
human2_lib2.final_cell_0366	17.7848	-16.3113	beta
human3_lib3.final_cell_0279	45.0194	16.1867	beta
human1_lib3.final_cell_0076	11.8907	22.583	beta
human3_lib1.final_cell_0375	-58.517	-5.47276	alpha
human3_lib2.final_cell_0108	38.0675	-55.4322	acinar
human1_lib1.final_cell_0259	9.61587	13.1601	beta
human1_lib3.final_cell_0423	3.41994	17.5421	beta
human4_lib3.final_cell_0234	-9.07513	-29.2811	beta
human4_lib1.final_cell_0069	10.3591	52.4279	delta
human3_lib1.final_cell_0557	-41.552	-48.348	ductal
human3_lib1.final_cell_0232	-42.564	7.8813	alpha
human4_lib1.final_cell_0264	16.5875	-49.1439	ductal
human3_lib1.final_cell_0297	-38.9209	2.91816	alpha
human3_lib2.final_cell_0653	-53.44	-11.4949	alpha
human4_lib3.final_cell_0511	-14.1681	-19.1213	beta
human3_lib1.final_cell_0199	43.8251	-5.51074	beta
human4_lib1.final_cell_0501	-4.12906	-18.2532	beta
human3_lib4.final_cell_0598	54.4622	17.4542	beta
human2_lib3.final_cell_0150	-16.1937	39.0324	alpha
human3_lib4.final_cell_0542	-42.4639	7.0192	alpha
human3_lib1.final_cell_0628	51.478	-33.3136	acinar
human2_lib3.final_cell_0366	13.1294	-8.23612	beta
human1_lib1.final_cell_0492	2.67684	39.7874	alpha
human2_lib1.final_cell_0306	-21.0879	42.5687	alpha
human4_lib1.final_cell_0202	-11.1005	-24.6125	beta
human2_lib3.final_cell_0306	17.5227	69.7139	delta
human4_lib1.final_cell_0543	-13.8171	-17.1775	beta
human3_lib4.final_cell_0640	-44.6023	-2.91319	alpha
human4_lib1.final_cell_0011	-46.4516	47.7242	alpha
human2_lib3.final_cell_0451	21.7744	-14.5794	beta
human3_lib4.final_cell_0409	-38.8262	11.1525	alpha
human3_lib2.final_cell_0191	-38.8122	-51.2019	ductal
human3_lib3.final_cell_0618	-44.0502	9.60312	alpha
human2_lib3.final_cell_0396	-20.2604	22.0733	alpha
human2_lib2.final_cell_0558	-7.95739	32.0418	alpha
human3_lib1.final_cell_0227	-56.491	-11.0332	alpha
human1_lib1.final_cell_0464	55.9719	48.4688	endothelial
human4_lib1.final_cell_0476	-12.5633	-17.7422	beta
human3_lib4.final_cell_0722	-48.1767	10.9824	alpha
human3_lib3.final_cell_0067	29.1016	-42.0415	acinar
human4_lib1.final_cell_0560	-38.3768	54.3285	alpha
human3_lib4.final_cell_0270	45.6214	-57.9927	acinar
human1_lib3.final_cell_0571	24.7882	41.9516	delta
human4_lib3.final_cell_0537	-43.5121	49.6516	alpha
human4_lib1.final_cell_0178	-16.0012	-66.4719	ductal
human3_lib2.final_cell_0859	39.8832	-0.207651	beta
human2_lib2.final_cell_0521	10.5649	-11.5836	beta
human2_lib1.final_cell_0329	-13.6553	31.7578	alpha
human3_lib3.final_cell_0264	24.7711	55.8965	delta
human3_lib1.final_cell_0403	66.2427	8.01393	beta
human3_lib1.final_cell_0325	-56.8658	-6.71956	alpha
human3_lib3.final_cell_0537	53.0659	-32.7352	acinar
human2_lib1.final_cell_0267	21.6891	70.7507	delta
human3_lib4.final_cell_0216	-41.4048	2.33704	alpha
human3_lib4.final_cell_0671	41.8635	-4.02375	beta
human3_lib1.final_cell_0483	44.0362	-42.9663	acinar
human2_lib3.final_cell_0297	-21.8164	-52.3913	ductal
human3_lib2.final_cell_0341	53.5344	19.3267	ductal
human2_lib1.final_cell_0055	-13.2408	38.607	alpha
human4_lib3.final_cell_0538	-30.9109	53.1918	alpha
human1_lib3.final_cell_0007	28.268	-39.6887	acinar
human1_lib3.final_cell_0222	6.45336	14.711	beta
human3_lib2.final_cell_0534	41.4306	14.8736	beta
human3_lib4.final_cell_0554	-29.0629	-3.3008	alpha
human3_lib3.final_cell_0923	53.8988	36.4399	endothelial
human4_lib3.final_cell_0173	-44.1622	48.0495	alpha
human3_lib4.final_cell_0106	49.7105	-51.6962	acinar
human4_lib3.final_cell_0430	-83.8781	14.6088	gamma
human3_lib1.final_cell_0742	-39.9537	1.93994	alpha
human3_lib3.final_cell_0658	-34.0164	-3.72763	alpha
human4_lib3.final_cell_0352	4.0472	-8.6064	beta
human1_lib3.final_cell_0323	8.80455	18.761	beta
human2_lib2.final_cell_0256	-11.1731	36.8679	alpha
human2_lib1.final_cell_0198	17.6205	-12.0212	beta
human1_lib3.final_cell_0308	10.3219	7.60461	beta
human3_lib2.final_cell_0690	-36.6496	-57.2711	ductal
human2_lib1.final_cell_0243	-14.4046	36.0537	alpha
human1_lib3.final_cell_0373	16.0782	20.5399	beta
human3_lib3.final_cell_0170	54.8742	-47.1356	acinar
human3_lib4.final_cell_0764	51.8342	3.31807	beta
human3_lib1.final_cell_0845	39.9685	-3.61233	beta
human3_lib4.final_cell_0518	49.8387	-57.2622	acinar
human3_lib3.final_cell_0539	-55.07	-9.87112	alpha
human4_lib1.final_cell_0025	-40.4137	57.7885	alpha
human3_lib2.final_cell_0219	62.4796	5.36978	beta
human2_lib2.final_cell_0405	-17.0803	45.323	alpha
human3_lib4.final_cell_0662	45.8443	-57.005	acinar
human3_lib4.final_cell_0271	-35.9809	-46.1409	ductal
human2_lib3.final_cell_0298	-9.35341	-61.262	ductal
human1_lib3.final_cell_0079	14.3392	19.6217	beta
human1_lib2.final_cell_0196	18.4603	15.7819	beta
human2_lib2.final_cell_0041	-15.9054	50.4227	alpha
human4_lib3.final_cell_0317	-14.8706	-69.0439	ductal
human1_lib1.final_cell_0326	-55.5317	31.6846	alpha
human4_lib1.final_cell_0449	-84.036	14.0048	gamma
human3_lib1.final_cell_0070	45.7485	-40.5395	acinar
human3_lib3.final_cell_0329	-31.4185	-40.7715	ductal
human4_lib3.final_cell_0369	-41.5087	58.6624	alpha
human3_lib1.final_cell_0098	41.8516	-50.7903	acinar
human3_lib1.final_cell_0474	66.1418	9.6938	beta
human1_lib2.final_cell_0088	18.7484	-56.3725	acinar
human3_lib2.final_cell_0775	-53.1657	10.6808	alpha
human3_lib3.final_cell_0422	62.3756	16.5386	beta
human2_lib3.final_cell_0212	-20.8274	31.6764	alpha
human3_lib2.final_cell_0627	42.328	-8.39008	beta
human2_lib3.final_cell_0019	18.4163	65.3861	delta
human3_lib3.final_cell_0452	-32.261	-9.03059	alpha
human1_lib1.final_cell_0429	32.9912	21.2914	beta
human2_lib2.final_cell_0446	-8.25969	41.1818	alpha
human1_lib3.final_cell_0040	4.88232	65.0453	delta
human1_lib2.final_cell_0226	-76.626	12.0245	gamma
human1_lib2.final_cell_0160	-26.7651	-59.2839	ductal
human3_lib4.final_cell_0143	48.6168	-52.5371	acinar
human3_lib2.final_cell_0008	44.3233	-48.1208	acinar
human2_lib1.final_cell_0213	10.7136	-56.1872	ductal
human3_lib1.final_cell_0373	54.9542	-36.6691	acinar
human2_lib3.final_cell_0406	-14.4027	33.8506	alpha
human4_lib3.final_cell_0342	-12.9931	-66.7602	ductal
human3_lib3.final_cell_0465	41.9964	15.2607	beta
human3_lib1.final_cell_0578	-39.9638	-44.4205	ductal
human2_lib2.final_cell_0505	-10.597	38.2894	alpha
human4_lib3.final_cell_0688	-4.79719	-9.58958	beta
human3_lib3.final_cell_0355	51.4189	-56.8058	acinar
human4_lib1.final_cell_0404	-10.4437	-18.6951	beta
human1_lib1.final_cell_0243	6.82264	10.193	beta
human1_lib3.final_cell_0311	-75.1265	13.356	gamma
human2_lib3.final_cell_0290	20.8448	-15.3551	beta
human3_lib2.final_cell_0661	-47.8359	-12.1224	alpha
human2_lib3.final_cell_0316	-19.0239	32.6174	alpha
human3_lib4.final_cell_0012	36.6285	-57.4586	acinar
human4_lib3.final_cell_0237	-3.02867	-31.8169	beta
human3_lib3.final_cell_0871	40.9999	-8.90653	beta
human2_lib1.final_cell_0056	12.8239	-17.1438	beta
human1_lib2.final_cell_0232	57.0748	45.8384	endothelial
human3_lib1.final_cell_0623	10.6263	48.1541	delta
human3_lib2.final_cell_0734	65.7606	10.2784	beta
human4_lib3.final_cell_0599	3.51527	69.8785	delta
human1_lib1.final_cell_0563	19.3018	0.495816	beta
human3_lib4.final_cell_0309	52.7923	2.65568	beta
human1_lib1.final_cell_0096	29.8954	27.5411	beta
human2_lib3.final_cell_0085	-14.332	38.1508	alpha
human1_lib2.final_cell_0483	31.6187	19.3663	beta
human3_lib3.final_cell_0310	59.1977	10.9281	beta
human2_lib2.final_cell_0588	26.0827	-4.9412	beta
human2_lib1.final_cell_0509	-20.4435	15.3112	alpha
human2_lib1.final_cell_0528	-20.8331	12.9747	alpha
human2_lib3.final_cell_0084	-22.0617	46.1875	alpha
human3_lib1.final_cell_0826	-50.1163	17.3355	alpha
human1_lib1.final_cell_0462	12.8988	1.26331	beta
human3_lib4.final_cell_0093	49.3462	-44.129	acinar
human3_lib1.final_cell_0027	42.6221	-55.0744	acinar
human1_lib1.final_cell_0315	-70.061	5.69868	beta
human4_lib1.final_cell_0369	-40.0465	55.6406	alpha
human1_lib3.final_cell_0424	-55.9284	32.426	gamma
human4_lib3.final_cell_0591	-81.1859	13.2242	gamma
human3_lib3.final_cell_0222	-34.4661	-7.87758	alpha
human3_lib1.final_cell_0342	-32.4493	-50.8627	ductal
human4_lib3.final_cell_0018	4.51362	74.8124	delta
human3_lib1.final_cell_0751	62.724	17.7796	delta
human4_lib3.final_cell_0494	-10.4231	-14.8968	beta
human1_lib3.final_cell_0736	55.6322	53.8633	endothelial
human3_lib4.final_cell_0396	-33.8994	-41.5724	ductal
human2_lib2.final_cell_0107	-14.0774	48.7123	alpha
human1_lib2.final_cell_0610	57.394	52.51	endothelial
human3_lib1.final_cell_0063	50.9461	-53.667	acinar
human3_lib4.final_cell_0231	-47.6285	6.56398	alpha
human3_lib1.final_cell_0405	-51.2355	-12.4941	alpha
human3_lib3.final_cell_0582	-39.5089	11.593	alpha
human3_lib3.final_cell_0002	40.2457	-58.9677	acinar
human3_lib1.final_cell_0605	50.2515	42.1803	endothelial
human3_lib4.final_cell_0051	55.6515	-44.8746	acinar
human1_lib3.final_cell_0391	-52.0146	34.0604	alpha
human4_lib1.final_cell_0455	17.033	-54.1884	ductal
human2_lib2.final_cell_0146	7.9249	-57.6038	ductal
human4_lib1.final_cell_0439	-8.57397	-64.5825	ductal
human1_lib1.final_cell_0118	8.1537	22.0762	beta
human3_lib1.final_cell_0449	54.1149	6.62257	beta
human4_lib3.final_cell_0555	-9.85204	-13.7001	beta
human3_lib2.final_cell_0285	61.6597	16.8758	beta
human4_lib3.final_cell_0638	36.4373	16.0424	beta
human3_lib4.final_cell_0145	-38.1752	-48.4753	ductal
human4_lib1.final_cell_0403	-6.54955	-23.8749	beta
human4_lib1.final_cell_0396	-5.41394	-29.3597	beta
human4_lib1.final_cell_0097	5.66605	75.1346	delta
human1_lib3.final_cell_0348	5.76379	10.0195	beta
human2_lib1.final_cell_0062	-26.1569	39.6033	alpha
human1_lib2.final_cell_0500	8.00014	46.1717	gamma
human3_lib4.final_cell_0470	42.5208	-8.17466	beta
human3_lib3.final_cell_0439	-27.776	-12.9267	alpha
human4_lib3.final_cell_0502	-14.5068	-20.8408	beta
human3_lib3.final_cell_0217	-45.7862	7.02296	alpha
human2_lib2.final_cell_0376	-18.0696	-48.7615	ductal
human1_lib1.final_cell_0557	-26.3729	-57.1358	ductal
human1_lib2.final_cell_0081	8.79224	59.3058	delta
human3_lib4.final_cell_0082	26.4217	60.1319	delta
human1_lib2.final_cell_0435	-50.2059	32.1912	alpha
human1_lib2.final_cell_0609	11.8472	0.302529	beta
human3_lib1.final_cell_0441	-36.1682	-6.24643	alpha
human1_lib2.final_cell_0445	35.928	13.938	beta
human2_lib1.final_cell_0310	-13.3041	29.7353	alpha
human3_lib4.final_cell_0709	65.05	3.87007	beta
human2_lib2.final_cell_0098	-22.1249	47.4461	alpha
human3_lib2.final_cell_0705	-39.0668	-49.1891	ductal
human3_lib4.final_cell_0413	21.273	56.5323	delta
human1_lib3.final_cell_0275	-53.351	37.1432	alpha
human3_lib4.final_cell_0364	53.5572	8.64688	beta
human3_lib4.final_cell_0432	-29.022	-2.36099	alpha
human3_lib4.final_cell_0472	63.5237	15.6528	beta
human3_lib3.final_cell_0620	66.9296	5.11564	alpha
human3_lib4.final_cell_0442	-27.6601	-48.7861	ductal
human1_lib2.final_cell_0386	-55.1302	30.7589	alpha
human1_lib2.final_cell_0221	14.1549	15.5088	beta
human2_lib3.final_cell_0263	-82.3692	3.74455	gamma
human3_lib3.final_cell_0440	52.5009	-39.4946	acinar
human2_lib2.final_cell_0066	10.4255	-17.8069	beta
human1_lib2.final_cell_0624	20.1034	0.420521	beta
human4_lib1.final_cell_0465	-7.11674	-26.0972	beta
human4_lib3.final_cell_0519	-4.85522	-19.1648	beta
human2_lib3.final_cell_0027	10.106	-55.2221	ductal
human1_lib1.final_cell_0204	5.5736	13.6315	beta
human2_lib2.final_cell_0133	16.7787	-12.5453	beta
human3_lib1.final_cell_0830	-23.0169	7.57055	alpha
human3_lib1.final_cell_0021	42.176	-53.7582	acinar
human2_lib3.final_cell_0517	-20.2519	22.0711	alpha
human2_lib2.final_cell_0265	12.5935	-15.5342	beta
human4_lib1.final_cell_0519	-41.5613	47.183	alpha
human3_lib4.final_cell_0897	-25.4408	7.35461	alpha
human3_lib3.final_cell_0457	-39.8136	-3.209	alpha
human1_lib2.final_cell_0438	6.86997	3.10689	beta
human3_lib4.final_cell_0836	-51.4503	-19.6749	alpha
human4_lib3.final_cell_0346	5.57675	72.4064	delta
human1_lib3.final_cell_0228	7.16586	14.6329	beta
human1_lib1.final_cell_0436	30.596	-32.9325	acinar
human3_lib3.final_cell_0325	-59.3854	-9.06863	alpha
human1_lib2.final_cell_0423	-52.7726	26.6034	alpha
human1_lib2.final_cell_0250	-57.6778	28.5372	alpha
human3_lib3.final_cell_0045	51.6911	-42.9387	acinar
human3_lib4.final_cell_0016	53.1747	-44.1774	acinar
human2_lib3.final_cell_0241	-20.918	34.8305	alpha
human1_lib2.final_cell_0091	7.61295	7.73566	beta
human1_lib3.final_cell_0133	7.65351	16.383	beta
human3_lib3.final_cell_0534	64.0026	11.983	beta
human1_lib2.final_cell_0069	12.4521	17.9234	beta
human2_lib1.final_cell_0534	-17.3442	-48.9883	ductal
human2_lib1.final_cell_0389	-16.1482	28.2739	alpha
human1_lib1.final_cell_0246	6.81403	58.3136	delta
human4_lib3.final_cell_0284	-4.87133	-28.0073	beta
human3_lib3.final_cell_0725	56.2746	-34.8566	acinar
human4_lib1.final_cell_0090	3.76562	71.1239	delta
human3_lib3.final_cell_0343	43.5226	-7.20843	beta
human4_lib1.final_cell_0121	-3.27037	-30.0503	beta
human2_lib2.final_cell_0313	-10.3	37.3017	alpha
human3_lib3.final_cell_0120	41.124	-60.0786	acinar
human4_lib1.final_cell_0600	-34.5115	-63.7625	ductal
human2_lib3.final_cell_0274	9.902	-55.7755	ductal
human3_lib4.final_cell_0361	-33.3762	-52.5348	ductal
human1_lib1.final_cell_0254	2.38599	4.57617	beta
human3_lib1.final_cell_0035	39.6817	-44.3801	acinar
human1_lib2.final_cell_0584	58.3802	52.0513	endothelial
human3_lib4.final_cell_0199	32.6264	-58.5653	acinar
human1_lib3.final_cell_0541	30.9328	-41.3895	acinar
human2_lib3.final_cell_0369	9.48441	-54.1359	ductal
human3_lib3.final_cell_0270	63.3867	5.89502	beta
human2_lib2.final_cell_0567	-18.5109	27.9858	alpha
human2_lib2.final_cell_0126	23.1296	-17.1569	beta
human3_lib4.final_cell_0290	-44.2887	-13.4217	alpha
human2_lib2.final_cell_0325	23.6062	-19.6392	beta
human3_lib4.final_cell_0696	54.3278	-38.2387	acinar
human3_lib1.final_cell_0281	-54.3175	-12.2966	alpha
human3_lib1.final_cell_0635	-35.0356	-52.4082	ductal
human1_lib3.final_cell_0556	31.275	26.6502	beta
human2_lib2.final_cell_0179	-12.2338	41.8473	alpha
human3_lib2.final_cell_0300	40.127	-44.4798	acinar
human2_lib1.final_cell_0082	-10.3062	-62.4033	ductal
human1_lib1.final_cell_0501	12.7011	5.71583	beta
human1_lib2.final_cell_0159	12.3784	17.3877	beta
human2_lib3.final_cell_0475	13.7634	-18.0093	beta
human3_lib3.final_cell_0776	63.4917	4.22295	beta
human1_lib3.final_cell_0495	34.2435	18.8392	beta
human3_lib3.final_cell_0260	63.384	11.5992	beta
human2_lib3.final_cell_0176	2.53469	38.2635	alpha
human1_lib2.final_cell_0552	41.6396	72.2006	mast
human2_lib1.final_cell_0132	-20.9502	48.6129	alpha
human3_lib4.final_cell_0024	41.8806	-57.2802	acinar
human1_lib3.final_cell_0679	-19.9987	-61.482	ductal
human1_lib3.final_cell_0386	32.1442	-34.1721	acinar
human3_lib4.final_cell_0182	43.5722	-57.5138	acinar
human3_lib3.final_cell_0536	44.8666	-59.028	acinar
[truncated: 6,039 more rows]

## Sheet: smart-seq2 pancreas
tSNE result of smart-seq2 pancreas dataset
	TSNE1	TSNE2	cluster
HP1502401_H13	-31.9115	36.1456	gamma
HP1502401_J14	14.2302	35.2434	alpha
HP1502401_B14	48.8275	26.9781	beta
HP1502401_A14	-33.7819	-35.4	acinar
HP1502401_C14	12.5164	34.5127	alpha
HP1502401_G14	48.5088	26.6084	beta
HP1502401_E14	3.22104	50.8406	epsilon
HP1502401_L14	-32.6038	35.3248	gamma
HP1502401_M14	8.83073	36.0526	alpha
HP1502401_K14	-33.1348	35.0767	gamma
HP1502401_I14	-32.0176	-33.565	acinar
HP1502401_F13	-34.0481	-35.8665	acinar
HP1502401_L13	8.25144	31.7291	alpha
HP1502401_D13	47.3117	27.3195	beta
HP1502401_H14	7.58977	32.1093	alpha
HP1502401_F17	-31.0445	37.1993	gamma
HP1504101T2D_B4	-37.6156	33.2177	gamma
HP1504101T2D_M6	-2.26461	31.3494	alpha
HP1504101T2D_F15	-10.133	34.5711	alpha
HP1502401_H23	-26.1347	-10.2858	ductal
HP1502401_L21	13.5991	33.1292	alpha
HP1504101T2D_F10	0.0274135	31.3425	alpha
HP1504101T2D_B10	-35.6799	32.5843	gamma
HP1502401_G18	-34.5915	-36.1	acinar
HP1502401_K22	11.2399	36.4197	alpha
HP1502401_I22	12.3641	27.5696	alpha
HP1504101T2D_M18	-2.72622	27.7138	alpha
HP1502401_J22	45.9481	29.6669	beta
HP1502401_F4	15.1529	29.9364	alpha
HP1504101T2D_O12	50.4051	24.2711	beta
HP1502401_M15	14.0218	34.693	alpha
HP1504101T2D_G16	-36.0663	28.7008	gamma
HP1504101T2D_L23	-4.22485	32.9931	alpha
HP1502401_G24	48.1975	28.4376	beta
HP1502401_G23	-25.603	-10.1975	ductal
HP1504101T2D_A24	30.8808	12.3782	delta
HP1504101T2D_N17	-3.91109	33.7915	alpha
HP1502401_N8	46.2574	27.7826	beta
HP1504101T2D_G1	-8.61967	29.1807	alpha
HP1504101T2D_A15	-35.7885	31.9631	gamma
HP1504101T2D_M19	-2.68323	27.1729	alpha
HP1502401_O16	47.5321	27.764	beta
HP1504101T2D_E16	49.2776	23.9852	beta
HP1502401_A12	8.11905	32.6187	alpha
HP1502401_D18	-26.9733	-9.9676	ductal
HP1504101T2D_K2	-34.0947	28.4331	gamma
HP1502401_D5	11.9687	34.3065	alpha
HP1502401_H22	46.9669	28.847	beta
HP1504101T2D_J15	-6.04918	29.3332	alpha
HP1504101T2D_N7	-6.38749	36.0576	alpha
HP1504101T2D_O16	-4.85907	34.8096	alpha
HP1502401_M5	8.9041	31.2671	alpha
HP1504101T2D_M4	-8.24128	26.5534	alpha
HP1504101T2D_I20	-6.50306	28.9315	alpha
HP1504101T2D_B22	-34.8317	29.0665	gamma
HP1504101T2D_G4	-36.7717	30.5978	gamma
HP1502401_H15	8.18515	32.8902	alpha
HP1502401_H8	7.51035	32.6768	alpha
HP1502401_N17	15.5003	30.9616	alpha
HP1504101T2D_L13	-34.6342	31.6146	gamma
HP1504101T2D_K24	-1.48657	30.4998	alpha
HP1504101T2D_B24	-32.9776	32.4525	gamma
HP1504101T2D_H14	-34.6714	33.6798	gamma
HP1502401_A7	50.7112	28.9576	beta
HP1504101T2D_I1	-2.2435	22.8817	alpha
HP1502401_O2	11.3916	35.4882	alpha
HP1502401_J21	12.6025	29.9256	alpha
HP1504101T2D_J13	-2.5757	32.514	alpha
HP1502401_J8	14.2286	32.6986	alpha
HP1502401_N15	11.3181	35.8039	alpha
HP1504101T2D_L14	-32.9002	-37.9001	acinar
HP1504101T2D_D2	-2.20378	33.1168	alpha
HP1502401_N2	-34.6064	-36.4124	acinar
HP1502401_H7	8.59958	34.9577	alpha
HP1504101T2D_O13	-3.23153	15.9081	alpha
HP1504101T2D_L2	-2.07299	30.9359	alpha
HP1502401_E5	-31.8806	35.0113	gamma
HP1502401_O1	10.5235	30.0097	alpha
HP1502401_B7	47.0442	29.5678	beta
HP1504101T2D_I24	-8.73413	34.5269	alpha
HP1504101T2D_J18	-10.8152	31.9228	alpha
HP1502401_L3	4.27236	32.7206	alpha
HP1502401_J1	10.2622	33.3514	alpha
HP1502401_H3	11.4687	30.9356	alpha
HP1504101T2D_B6	50.2811	24.5912	beta
HP1502401_I15	8.37208	32.6685	alpha
HP1504101T2D_B8	-24.0908	-15.1698	ductal
HP1502401_D17	29.7187	14.2488	delta
HP1504101T2D_M15	-12.5413	30.3556	alpha
HP1502401_I4	4.81852	30.9458	alpha
HP1502401_J23	12.9915	34.1991	alpha
HP1502401_O14	-33.4357	-35.4771	acinar
HP1504101T2D_N15	-9.37142	28.0276	alpha
HP1502401_L5	-24.8467	-12.187	ductal
HP1504101T2D_F7	-9.13644	28.4155	alpha
HP1504101T2D_I5	-9.14362	31.8679	alpha
HP1504101T2D_C1	-19.6396	-1.05042	endothelial
HP1504101T2D_P14	-10.7449	32.1697	alpha
HP1504101T2D_A20	-38.3514	30.0784	gamma
HP1502401_H11	47.0439	27.5567	beta
HP1504101T2D_K19	-31.0561	-35.9887	acinar
HP1502401_K15	14.4701	31.1013	alpha
HP1504101T2D_C17	-9.00403	28.9487	alpha
HP1502401_G10	28.5306	-18.2474	alpha
HP1502401_L2	14.1841	35.0659	alpha
HP1502401_L23	11.4604	32.5259	alpha
HP1502401_F19	9.43988	32.7118	alpha
HP1502401_L17	15.6375	32.1545	alpha
HP1502401_O22	10.2466	34.2782	alpha
HP1504101T2D_I7	-33.3303	31.1517	gamma
HP1504101T2D_H5	31.2217	12.4452	delta
HP1502401_L16	14.7859	33.4638	alpha
HP1504101T2D_F22	-3.79211	32.2622	alpha
HP1504101T2D_J2	-29.0655	30.6623	alpha
HP1504101T2D_E1	-10.2622	28.0539	alpha
HP1502401_A18	30.1903	10.8604	delta
HP1504101T2D_A19	-8.97543	28.9889	alpha
HP1504101T2D_G2	-7.91831	25.0265	alpha
HP1504101T2D_J11	0.420002	30.012	alpha
HP1504101T2D_K22	-4.06182	27.7055	alpha
HP1502401_L12	13.8341	31.2382	alpha
HP1504101T2D_E19	-2.15109	21.794	alpha
HP1502401_H2	8.75859	31.719	alpha
HP1504101T2D_G17	-5.98442	30.004	alpha
HP1502401_N1	48.6736	26.4735	beta
HP1504101T2D_N19	-7.49298	24.9201	alpha
HP1504101T2D_I17	-8.1664	28.5962	alpha
HP1502401_E7	-32.5769	35.5026	gamma
HP1504101T2D_E11	-33.7528	29.9448	gamma
HP1502401_H21	-26.322	-9.2259	ductal
HP1504101T2D_E18	-36.2103	31.6817	gamma
HP1504101T2D_D7	-5.50565	32.758	alpha
HP1502401_B18	-30.7768	36.0938	gamma
HP1502401_K9	10.0244	31.6318	alpha
HP1502401_E16	6.50644	33.5534	alpha
HP1504101T2D_L21	-7.20665	32.7934	alpha
HP1504101T2D_N12	-1.43164	31.6596	alpha
HP1502401_M4	14.549	31.5678	alpha
HP1504101T2D_B16	-3.55427	35.6684	alpha
HP1504101T2D_E23	-9.94794	28.2699	alpha
HP1502401_D7	47.4835	30.221	beta
HP1504101T2D_L15	-37.0138	31.0935	gamma
HP1504101T2D_D17	-37.548	31.3939	gamma
HP1504101T2D_A4	-37.9983	30.0761	gamma
HP1502401_O21	14.2607	33.1575	alpha
HP1502401_M10	9.82805	31.0703	alpha
HP1504101T2D_H9	-8.26492	27.6743	alpha
HP1504101T2D_A5	-4.96117	32.9307	alpha
HP1504101T2D_K23	-7.70706	25.151	alpha
HP1502401_I7	31.5342	11.2574	delta
HP1502401_C18	47.9758	28.9442	beta
HP1502401_O6	31.2831	11.7108	delta
HP1502401_K24	-32.0431	34.8541	gamma
HP1502401_J11	15.086	30.6977	alpha
HP1502401_H4	13.4771	34.1	alpha
HP1502401_L11	11.4137	33.832	alpha
HP1502401_K3	12.9755	31.911	alpha
HP1502401_C8	30.9034	11.2452	delta
HP1504101T2D_I18	-0.64656	30.2747	alpha
HP1502401_F22	46.6305	30.8254	beta
HP1502401_I16	12.889	27.1562	alpha
HP1502401_B17	-32.5677	-35.3512	acinar
HP1504101T2D_P2	-6.28667	27.3949	alpha
HP1502401_N18	-27.232	-11.0417	ductal
HP1504101T2D_N10	49.1276	23.8188	beta
HP1504101T2D_I14	-5.4281	35.3856	alpha
HP1504101T2D_F17	29.7706	11.662	delta
HP1502401_B24	47.603	28.9395	beta
HP1502401_C6	49.2391	27.9446	beta
HP1504101T2D_G9	-34.8109	27.6706	gamma
HP1502401_N12	14.8515	31.4113	alpha
HP1502401_M24	10.9542	35.0764	alpha
HP1504101T2D_E10	-9.65924	35.4344	alpha
HP1504101T2D_P9	-32.2822	30.6902	gamma
HP1504101T2D_G24	-8.25831	27.6359	alpha
HP1502401_N4	11.1281	34.2828	alpha
HP1502401_E21	9.91049	34.3086	alpha
HP1502401_H6	30.9256	10.9435	delta
HP1504101T2D_I6	-31.0834	-35.9547	acinar
HP1502401_J6	7.41162	32.7896	alpha
HP1502401_M7	10.7318	37.8021	alpha
HP1504101T2D_M21	-4.93146	31.6557	alpha
HP1504101T2D_F11	-38.0091	32.7832	gamma
HP1504101T2D_D19	-11.3798	31.9368	alpha
HP1502401_O24	28.8517	-18.8144	alpha
HP1504101T2D_E24	50.509	24.2242	beta
HP1504101T2D_K4	-8.47984	34.011	alpha
HP1502401_I6	48.1993	25.6179	beta
HP1504101T2D_N9	-0.440259	31.349	alpha
HP1502401_C16	12.2585	35.6814	alpha
HP1504101T2D_M7	-9.27553	32.1472	alpha
HP1502401_B20	12.9603	27.4922	alpha
HP1502401_K23	-32.4111	37.1998	gamma
HP1502401_F18	-30.8761	36.1951	gamma
HP1504101T2D_O4	-37.4438	30.9795	gamma
HP1504101T2D_E4	-31.9131	30.2821	gamma
HP1502401_G4	49.4546	27.0608	beta
HP1504101T2D_I16	-38.8743	31.9727	gamma
HP1504101T2D_D1	-11.2869	29.8354	alpha
HP1504101T2D_O6	-9.60129	33.4544	alpha
HP1504101T2D_D18	-35.8781	33.6762	gamma
HP1504101T2D_F2	-32.2426	28.7061	gamma
HP1502401_D8	-3.54619	18.391	alpha
HP1504101T2D_E6	-10.1613	26.754	alpha
HP1504101T2D_I15	-36.0244	32.0577	gamma
HP1504101T2D_I10	-34.0412	31.0564	gamma
HP1502401_B21	48.7631	26.1897	beta
HP1502401_D3	50.4454	28.0545	beta
HP1502401_O18	30.4128	10.5633	delta
HP1504101T2D_E14	-36.6129	31.4519	gamma
HP1504101T2D_C18	50.4893	24.2881	beta
HP1502401_G6	47.9867	31.0168	beta
HP1504101T2D_B11	-1.76961	33.3312	alpha
HP1504101T2D_C4	-3.54481	34.4385	alpha
HP1504101T2D_C15	-10.0244	31.0536	alpha
HP1502401_F12	11.3434	34.931	alpha
HP1504101T2D_C22	-11.1218	33.6933	alpha
HP1502401_C10	47.963	26.8904	beta
HP1502401_L7	5.59701	31.951	alpha
HP1502401_F11	30.7134	14.331	delta
HP1502401_M8	-33.9793	-35.6826	acinar
HP1502401_I2	-26.6243	-10.0311	ductal
HP1502401_G11	-32.2463	34.9363	gamma
HP1502401_E19	48.579	27.5995	beta
HP1504101T2D_P24	-36.0482	30.6144	gamma
HP1502401_J10	48.1808	27.321	beta
HP1502401_L18	-28.1492	-10.7764	ductal
HP1504101T2D_D13	-7.89332	34.3075	alpha
HP1502401_I9	30.2048	11.2369	delta
HP1502401_D6	49.5628	28.4779	beta
HP1504101T2D_F12	-4.54519	30.7148	alpha
HP1504101T2D_C14	-5.39841	34.4471	alpha
HP1504101T2D_H20	-4.45568	34.9635	alpha
HP1504101T2D_E9	-32.7008	31.6353	gamma
HP1502401_A4	9.70819	35.8179	alpha
HP1504101T2D_G12	-8.68705	34.3441	alpha
HP1502401_K5	9.62139	37.3792	alpha
HP1502401_G12	-32.319	36.6692	gamma
HP1504101T2D_N13	-6.44983	26.7554	alpha
HP1502401_D12	31.0988	10.9383	delta
HP1502401_C4	12.1363	28.8037	alpha
HP1502401_K1	10.4576	30.5376	alpha
HP1502401_M2	48.9057	27.6471	beta
HP1502401_J20	13.7349	32.9201	alpha
HP1502401_N23	-32.0689	36.9237	gamma
HP1504101T2D_L8	-3.71096	31.3027	alpha
HP1504101T2D_L7	-9.91282	34.2295	alpha
HP1502401_O23	6.96037	35.5287	alpha
HP1502401_D22	48.5303	28.5215	beta
HP1502401_B5	8.42877	31.3229	alpha
HP1504101T2D_H18	-24.0451	-15.2159	ductal
HP1502401_D4	-25.6111	-12.1876	ductal
HP1502401_E6	8.01271	35.5744	alpha
HP1502401_J18	12.3845	35.8757	alpha
HP1504101T2D_A10	-31.3172	-35.5751	acinar
HP1502401_M1	11.3597	28.9596	alpha
HP1502401_B15	-32.6759	34.8983	gamma
HP1502401_J4	9.57961	37.5997	alpha
HP1502401_A15	13.2207	35.2833	alpha
HP1504101T2D_B17	-33.1309	28.6742	gamma
HP1502401_K10	-33.0481	-35.1065	acinar
HP1502401_D10	-34.3587	-36.1863	acinar
HP1504101T2D_N20	-36.9473	33.9202	gamma
HP1504101T2D_M24	-1.8524	33.7799	alpha
HP1502401_A22	-33.1063	-34.5208	acinar
HP1502401_G20	31.2433	9.29049	delta
HP1504101T2D_C12	-33.7981	28.3625	gamma
HP1504101T2D_G22	-7.22371	31.754	alpha
HP1504101T2D_P17	-3.00366	28.6703	alpha
HP1504101T2D_C9	30.3397	12.8171	delta
HP1502401_D20	12.1419	30.3684	alpha
HP1502401_G7	11.866	29.6531	alpha
HP1502401_H5	13.4044	26.4763	alpha
HP1502401_D16	12.1599	30.0108	alpha
HP1504101T2D_G14	-7.17536	29.5431	alpha
HP1504101T2D_G10	-8.10798	30.2128	alpha
HP1504101T2D_M1	-32.2304	31.6087	gamma
HP1502401_N7	30.2415	10.8167	delta
HP1504101T2D_A13	-35.2296	32.582	gamma
HP1502401_M19	11.0746	36.9487	alpha
HP1504101T2D_C11	-28.8011	-38.0434	acinar
HP1504101T2D_K12	-7.64042	30.7549	alpha
HP1502401_J15	-26.6091	-10.5082	ductal
HP1504101T2D_D21	-33.428	31.1809	gamma
HP1504101T2D_G19	-10.5689	30.458	alpha
HP1502401_K6	12.325	32.102	alpha
HP1502401_O9	22.2374	17.0271	mast
HP1502401_K2	8.29343	30.531	alpha
HP1504101T2D_B18	-37.1621	30.2402	gamma
HP1504101T2D_M2	-0.863701	31.6761	alpha
HP1502401_O8	10.6449	31.209	alpha
HP1504101T2D_M9	-7.05061	31.0489	alpha
HP1502401_K16	9.46349	36.4768	alpha
HP1502401_E17	46.7045	25.8255	alpha
HP1502401_M23	10.4321	28.7805	alpha
HP1504101T2D_O14	-6.96811	24.8468	alpha
HP1502401_N11	-31.8612	35.3915	gamma
HP1504101T2D_P22	-7.17666	30.2356	alpha
HP1502401_J19	-26.2038	-10.0851	ductal
HP1502401_G3	28.6316	11.7216	delta
HP1504101T2D_H6	50.9508	24.0247	beta
HP1502401_I18	12.2374	27.5496	alpha
HP1502401_J7	22.2131	17.0096	mast
HP1502401_L10	50.1888	28.9077	beta
HP1504101T2D_M10	-8.1636	30.0877	alpha
HP1502401_M12	50.4716	29.9818	beta
HP1502401_I1	12.6049	33.0781	alpha
HP1502401_N9	-32.2724	36.4153	gamma
HP1502401_F15	-32.3226	34.1175	gamma
HP1504101T2D_A17	-34.3563	28.5485	gamma
HP1504101T2D_L11	30.8522	12.7156	delta
HP1504101T2D_E3	7.93796	56.337	alpha
HP1502401_L22	12.9696	29.8258	alpha
HP1502401_O10	-26.3269	-11.6858	ductal
HP1502401_G8	10.6635	31.846	alpha
HP1504101T2D_O22	-9.49448	34.2194	alpha
HP1504101T2D_E7	-33.335	30.1507	gamma
HP1504101T2D_M5	-3.53665	29.64	alpha
HP1502401_K12	-32.6111	-35.743	acinar
HP1504101T2D_K10	-33.2648	-37.0521	acinar
HP1504101T2D_B21	-2.95462	27.307	alpha
HP1504101T2D_C10	30.4092	13.2506	delta
HP1502401_D24	10.9924	29.135	alpha
HP1504101T2D_N21	30.8258	12.6438	delta
HP1502401_G22	49.7401	26.2537	beta
HP1502401_B1	48.2026	29.6985	beta
HP1502401_B11	-32.513	35.971	gamma
HP1502401_C12	-26.539	-11.3852	ductal
HP1504101T2D_J7	-5.469	29.1218	alpha
HP1504101T2D_G3	-37.1552	32.0436	gamma
HP1504101T2D_A6	0.565833	29.7221	alpha
HP1504101T2D_I8	-6.20695	30.4046	alpha
HP1504101T2D_J16	-34.202	-35.0156	acinar
HP1504101T2D_C21	-34.3293	28.339	gamma
HP1502401_O4	12.4104	36.8982	alpha
HP1502401_F24	48.9617	31.215	beta
HP1504101T2D_M8	-3.16152	18.9175	epsilon
HP1504101T2D_K8	-35.0136	30.9234	gamma
HP1504101T2D_D24	-35.8531	33.2356	gamma
HP1502401_L15	10.1453	35.9638	alpha
HP1504101T2D_P21	-9.5427	34.4724	alpha
HP1502401_L9	13.0883	26.4236	alpha
HP1502401_J16	22.2897	17.1108	mast
HP1502401_J17	-25.0586	-12.0094	ductal
HP1502401_M3	11.3461	33.7537	alpha
HP1504101T2D_A12	-1.49758	31.0717	alpha
HP1502401_E10	49.1563	29.3992	beta
HP1504101T2D_O9	-9.88969	28.0904	alpha
HP1504101T2D_F14	-36.7852	28.0175	gamma
HP1504101T2D_N1	-4.12107	30.5697	alpha
HP1504101T2D_H23	49.9906	24.6658	beta
HP1502401_N10	-25.5744	-11.9141	ductal
HP1502401_G5	48.4885	29.2196	beta
HP1502401_H20	10.4995	30.4726	alpha
HP1504101T2D_I23	-9.97393	29.8765	alpha
HP1502401_O20	10.7664	32.0867	alpha
HP1504101T2D_D9	51.0993	24.564	beta
HP1504101T2D_B5	-36.5122	28.7227	gamma
HP1504101T2D_L5	-0.613159	30.9507	alpha
HP1502401_H24	11.2391	30.0016	alpha
HP1502401_A6	46.9301	27.0643	beta
HP1504101T2D_O20	-6.30348	29.746	alpha
HP1504101T2D_E15	50.3731	24.4503	beta
HP1504101T2D_B7	-7.08243	28.5092	alpha
HP1502401_L4	12.8437	26.7682	alpha
HP1502401_C5	29.6584	10.8332	delta
HP1504101T2D_L24	-37.0367	29.5415	gamma
HP1504101T2D_B12	-36.8082	29.9556	gamma
HP1504101T2D_N24	-6.84065	29.3243	alpha
HP1504101T2D_H2	-4.14314	31.2014	alpha
HP1502401_A2	31.4098	11.7354	delta
HP1502401_D2	-33.0574	-37.5976	acinar
HP1504101T2D_N22	-7.7537	31.7542	alpha
HP1502401_O17	5.73048	31.6312	alpha
HP1504101T2D_E22	-9.17216	33.6376	alpha
HP1504101T2D_E8	-38.2026	28.922	gamma
HP1502401_M6	31.9231	11.425	delta
HP1504101T2D_L1	-37.2243	29.4177	gamma
HP1504101T2D_C20	-6.33354	36.0446	alpha
HP1504101T2D_H17	-3.52547	18.5002	alpha
HP1504101T2D_L4	-2.61699	33.8886	alpha
HP1504101T2D_P7	-8.18649	31.1652	alpha
HP1504101T2D_J14	29.6702	13.1357	delta
HP1502401_M17	22.3036	17.1139	mast
HP1504101T2D_O10	-4.24527	33.5984	alpha
HP1502401_H12	49.8276	27.6371	beta
HP1504101T2D_E21	-5.02053	27.0126	alpha
HP1504101T2D_K20	-6.41796	26.7561	alpha
HP1504101T2D_I22	-2.55607	30.9292	alpha
HP1502401_F9	47.3501	28.9411	beta
HP1504101T2D_H4	-3.04454	34.8169	alpha
HP1502401_F16	49.0779	31.4458	beta
HP1504101T2D_K17	-3.47386	28.2715	alpha
HP1504101T2D_L10	-1.50754	31.0343	alpha
HP1504101T2D_I2	-2.10795	22.1907	alpha
HP1504101T2D_J3	-36.0532	33.0461	gamma
HP1502401_E23	-32.8214	-38.0477	acinar
HP1502401_A24	30.7281	13.9004	delta
HP1502401_M11	9.30287	35.8309	alpha
HP1502401_I8	-31.3359	34.5629	gamma
HP1504101T2D_H21	-8.87358	26.9893	alpha
HP1502401_F23	7.73334	36.4925	alpha
HP1504101T2D_O3	-5.77411	31.8338	alpha
HP1504101T2D_N2	-6.12832	26.3065	alpha
HP1504101T2D_J20	-10.6973	31.4784	alpha
HP1504101T2D_L3	-3.22323	31.2137	alpha
HP1504101T2D_P11	-6.66722	31.9464	alpha
HP1502401_E24	-33.8212	-35.6101	acinar
HP1504101T2D_G21	-32.2208	30.4943	gamma
HP1504101T2D_F3	-12.4687	30.3074	alpha
HP1504101T2D_J1	-2.99979	33.757	alpha
HP1502401_M21	13.2637	32.7842	alpha
HP1504101T2D_F1	-33.793	-34.6375	acinar
HP1502401_I12	-19.7121	-0.738541	endothelial
HP1504101T2D_P5	30.4637	12.3016	delta
HP1502401_K21	6.83719	35.2817	alpha
HP1504101T2D_N8	-7.90179	32.3289	alpha
HP1502401_C20	30.4882	14.1915	delta
HP1504101T2D_G23	-10.9837	33.8408	alpha
HP1502401_H16	12.9991	31.35	alpha
HP1502401_J24	-26.7095	-10.3574	ductal
HP1504101T2D_D15	-37.3243	29.9155	gamma
HP1504101T2D_D23	-34.1098	29.8472	gamma
HP1504101T2D_N6	-1.03337	31.8293	alpha
HP1502401_L20	6.98852	35.1173	alpha
HP1502401_N20	28.4427	-18.3726	alpha
HP1502401_E11	9.92861	36.1767	alpha
HP1504101T2D_H1	-33.0424	30.9149	gamma
HP1502401_K11	10.4562	28.068	alpha
HP1502401_M16	-26.7829	-11.161	ductal
HP1502401_E2	-34.7648	-36.5287	acinar
HP1504101T2D_D12	-5.48308	28.1938	alpha
HP1504101T2D_H22	-7.8148	28.5171	alpha
HP1502401_B10	28.4581	-17.898	alpha
HP1502401_F20	8.26553	36.8788	alpha
HP1504101T2D_B13	-5.44939	32.8183	alpha
HP1504101T2D_F19	-0.689023	31.3488	alpha
HP1504101T2D_F13	-37.7404	29.422	gamma
HP1502401_B16	13.999	33.4361	alpha
HP1502401_C1	-31.0864	-34.7379	acinar
HP1502401_C21	48.1631	29.8561	beta
HP1504101T2D_J9	-37.2816	33.0674	gamma
HP1502401_I21	-24.235	-12.4535	ductal
HP1504101T2D_H24	-36.814	30.9404	gamma
HP1502401_C7	48.571	29.0266	beta
HP1502401_H19	47.707	28.2846	beta
HP1502401_L1	11.8138	34.9364	alpha
HP1502401_J2	-34.7929	-35.4612	acinar
HP1504101T2D_E20	-37.2327	33.0391	gamma
HP1502401_I24	48.31	27.7622	beta
HP1504101T2D_P12	-38.9957	31.5775	gamma
HP1502401_N21	46.9273	30.4505	beta
HP1502401_A10	45.9671	29.7916	beta
HP1502401_M22	-32.5042	-34.0559	acinar
HP1502401_A17	12.8183	37.0453	alpha
HP1504101T2D_A8	-3.29828	33.6774	alpha
HP1502401_J12	45.9441	29.6057	beta
HP1504101T2D_H15	-6.83235	27.3028	alpha
HP1504101T2D_J22	-36.248	30.3139	gamma
HP1502401_F21	49.0125	28.5237	beta
HP1502401_H1	9.3434	29.1472	alpha
HP1504101T2D_O11	-32.5008	30.136	gamma
HP1504101T2D_M23	-8.56676	30.5227	alpha
HP1504101T2D_J5	-32.0205	28.6739	gamma
HP1502401_I23	4.77158	30.9356	alpha
HP1504101T2D_G8	-35.3603	31.358	gamma
HP1502401_O3	11.0977	34.2509	alpha
HP1502401_F10	12.4589	30.7498	alpha
HP1502401_E3	30.2228	14.2236	delta
HP1504101T2D_J24	-5.51345	33.4428	alpha
HP1504101T2D_D5	-2.1938	29.6769	alpha
HP1504101T2D_D11	-29.2905	30.6459	gamma
HP1504101T2D_O23	-35.6952	30.5266	gamma
HP1502401_N3	12.4667	30.9636	alpha
HP1504101T2D_L18	-1.05309	31.1448	alpha
HP1504101T2D_F20	-35.0748	31.9862	gamma
HP1502401_N16	-24.2891	-15.041	ductal
HP1504101T2D_K18	-7.03203	27.5665	alpha
HP1504101T2D_P18	-7.9367	32.8181	alpha
HP1502401_E9	29.8006	10.8236	delta
HP1504101T2D_M3	-36.7217	31.7131	gamma
HP1504101T2D_L19	-4.9631	35.3263	alpha
HP1504101T2D_N5	-1.22663	32.8969	alpha
HP1502401_B8	30.1845	12.3405	delta
HP1502401_E20	-33.6207	-36.0931	acinar
HP1504101T2D_A23	-9.95035	31.9993	alpha
HP1504101T2D_D6	-5.16591	30.9528	alpha
HP1502401_K20	11.8002	31.8986	alpha
HP1504101T2D_N16	-35.8227	33.2963	gamma
HP1502401_B23	48.006	27.7312	beta
HP1504101T2D_O24	-27.6189	-16.8185	ductal
HP1504101T2D_A18	-34.5052	32.2864	gamma
HP1504101T2D_F16	-36.3818	32.4889	gamma
AZ_A2	-8.77116	44.6514	gamma
AZ_B9	-5.82413	44.8803	alpha
AZ_A6	-5.09813	41.7346	alpha
AZ_C11	32.6004	13.1794	delta
AZ_B10	34.0165	12.0692	delta
AZ_C10	42.9435	25.2598	beta
AZ_A5	-16.0904	-13.5955	ductal
AZ_B8	-34.4562	-33.4695	acinar
AZ_B1	34.0569	12.2172	delta
AZ_A12	34.165	11.9452	delta
AZ_C1	-6.09509	46.7448	alpha
AZ_A8	42.4729	25.302	beta
AZ_A11	-5.27609	43.381	alpha
AZ_C2	-6.77575	44.9114	alpha
AZ_B12	-5.92844	45.5246	alpha
AZ_B2	-7.25387	46.2838	alpha
AZ_B3	-6.52112	45.462	alpha
AZ_A7	-34.3806	-48.348	acinar
AZ_A10	34.4675	12.1978	delta
AZ_C3	-35.4852	0.0251233	ductal
AZ_B5	-6.47117	46.5529	alpha
AZ_E12	-5.10831	42.3675	alpha
AZ_H4	-19.2903	0.691469	endothelial
AZ_D3	-6.30846	44.8996	alpha
AZ_E4	-5.13574	41.531	alpha
AZ_H5	-27.2123	35.0688	gamma
AZ_G4	-4.93672	45.4371	alpha
AZ_G10	-4.64146	44.8279	alpha
AZ_D6	43.0704	24.8326	beta
AZ_H1	32.7172	13.3858	delta
AZ_G3	-4.70262	44.9787	alpha
AZ_H11	41.6485	25.3979	beta
AZ_D9	-5.74732	45.8428	alpha
AZ_D5	34.1045	12.1447	delta
AZ_G5	-27.734	34.1029	gamma
AZ_H2	41.464	25.5346	beta
AZ_E2	-6.91082	45.482	alpha
AZ_H10	-34.5223	-33.3005	acinar
AZ_F6	-34.2694	-48.1445	acinar
AZ_D8	-27.8283	33.8282	gamma
AZ_E7	49.8555	26.8516	beta
AZ_G2	41.8557	25.3443	beta
AZ_H6	41.3108	25.1567	beta
AZ_F9	-28.6632	-17.6465	ductal
AZ_C8	-6.46964	44.9909	alpha
AZ_H12	-27.2946	35.2173	gamma
AZ_E5	-5.93456	46.6253	alpha
AZ_D12	-27.3082	35.077	gamma
AZ_F4	-6.58347	46.3175	alpha
AZ_H3	-27.949	36.2272	gamma
AZ_C4	43.036	25.0928	beta
AZ_C5	-6.67561	45.0299	alpha
AZ_D7	-5.89706	44.9099	alpha
AZ_D4	-6.73873	45.8132	alpha
AZ_F2	42.9205	25.2283	beta
AZ_E8	-6.63777	45.5331	alpha
AZ_F1	43.0288	25.0677	beta
AZ_F8	-6.57517	45.4936	alpha
AZ_C9	-27.6282	-16.7681	ductal
AZ_G1	-5.23423	45.67	alpha
AZ_E9	-6.24198	47.2865	alpha
AZ_H9	-4.8373	45.238	alpha
AZ_D2	42.854	25.1365	beta
HP1508501T2D_E2	4.95422	7.67654	alpha
HP1508501T2D_M1	22.0627	16.8445	mast
HP1508501T2D_K2	-16.7843	-15.6269	ductal
HP1508501T2D_A3	-0.680118	7.93675	alpha
HP1508501T2D_I2	-1.56887	8.51863	alpha
HP1508501T2D_O1	-0.833795	8.69823	alpha
HP1508501T2D_G2	-18.9554	-21.4646	ductal
HP1508501T2D_I1	-19.9968	-16.472	ductal
HP1508501T2D_C2	-17.6135	-22.0785	ductal
HP1508501T2D_K1	-3.21287	6.74748	alpha
HP1508501T2D_G3	-19.0245	-19.6003	ductal
HP1508501T2D_G1	-16.4331	-18.9695	ductal
HP1508501T2D_C20	4.98937	9.9613	alpha
HP1508501T2D_M9	-3.38875	10.2492	alpha
HP1508501T2D_L13	1.33445	7.00734	alpha
HP1508501T2D_O4	61.9344	-1.39963	beta
HP1508501T2D_N1	-18.7904	-23.8662	ductal
HP1508501T2D_P7	-1.80305	7.17507	alpha
HP1508501T2D_B15	0.29626	7.18474	alpha
HP1508501T2D_D2	3.30146	14.0479	alpha
HP1508501T2D_D20	5.10542	11.7181	alpha
HP1508501T2D_H11	29.4109	8.86154	delta
HP1508501T2D_B18	-18.864	-20.8463	ductal
HP1508501T2D_G15	3.75984	7.24843	alpha
HP1508501T2D_M20	1.27245	7.16434	alpha
HP1508501T2D_B23	-0.999301	9.47863	alpha
HP1508501T2D_J21	5.90147	10.5427	alpha
HP1508501T2D_A13	4.2717	12.4424	alpha
HP1508501T2D_O3	-19.6744	-19.1103	ductal
HP1508501T2D_F3	61.1518	-1.46291	beta
HP1508501T2D_M17	-17.7492	-19.1382	ductal
HP1508501T2D_I15	1.74548	8.38055	alpha
HP1508501T2D_E6	-2.3326	14.79	alpha
HP1508501T2D_E14	0.734243	9.54466	alpha
HP1508501T2D_M19	0.810567	10.4102	alpha
HP1508501T2D_D17	2.15285	10.8077	alpha
HP1508501T2D_L18	5.27521	8.67106	alpha
HP1508501T2D_A23	-35.7805	-39.2211	acinar
HP1508501T2D_M3	-21.9581	-17.7982	ductal
HP1508501T2D_L20	-16.6567	-16.3736	ductal
HP1508501T2D_F17	4.85881	12.7987	alpha
HP1508501T2D_A10	62.3603	-1.28363	beta
HP1508501T2D_P14	-26.3398	-34.3563	acinar
HP1508501T2D_H22	5.99998	7.2841	alpha
HP1508501T2D_I20	1.04534	11.8733	alpha
HP1508501T2D_F4	-18.5487	-20.9605	ductal
HP1508501T2D_F12	-17.4898	-22.0404	ductal
HP1508501T2D_N9	-17.7808	-21.6447	ductal
HP1508501T2D_A19	-31.2439	25.2505	gamma
HP1508501T2D_B9	4.64767	10.3176	alpha
HP1508501T2D_J23	-28.3321	-38.5084	acinar
HP1508501T2D_B17	-19.2678	-18.1778	ductal
HP1508501T2D_D5	0.271392	10.7252	alpha
HP1508501T2D_I8	61.8334	-1.39711	beta
HP1508501T2D_L6	-3.45245	9.17638	alpha
HP1508501T2D_B5	5.75111	14.7663	alpha
HP1508501T2D_C14	61.9852	-1.31504	beta
HP1508501T2D_J11	-19.2073	-19.3058	ductal
HP1508501T2D_F16	-3.46784	9.45601	alpha
HP1508501T2D_L7	-2.78694	7.99469	alpha
HP1508501T2D_L14	-0.663196	8.29804	alpha
HP1508501T2D_N7	-18.7539	-22.723	ductal
HP1508501T2D_M15	-14.8416	-17.9307	ductal
HP1508501T2D_K22	-20.4456	-17.1837	ductal
HP1508501T2D_H17	-17.5431	-22.9004	ductal
HP1508501T2D_G10	-0.3366	10.9123	alpha
HP1508501T2D_M22	-18.8537	-19.5267	ductal
HP1508501T2D_N13	-28.603	-39.6379	acinar
HP1508501T2D_D6	5.06888	6.8303	alpha
HP1508501T2D_E12	-0.384277	7.97985	alpha
HP1508501T2D_P3	1.39261	8.04347	alpha
HP1508501T2D_H4	0.692914	8.50204	alpha
HP1508501T2D_E18	2.86643	8.94054	alpha
HP1508501T2D_G11	1.03605	13.1394	alpha
HP1508501T2D_P11	-1.11945	7.49465	alpha
HP1508501T2D_L16	0.940742	12.6638	alpha
HP1508501T2D_P9	-2.38628	5.50645	alpha
HP1508501T2D_F8	-8.56227	-24.7194	ductal
HP1508501T2D_O14	2.15865	9.54952	alpha
HP1508501T2D_D1	11.4576	24.5197	alpha
HP1508501T2D_O7	-35.2255	-41.6492	acinar
HP1508501T2D_K21	3.15463	9.62312	alpha
HP1508501T2D_H6	-2.63441	10.4291	alpha
HP1508501T2D_E15	-17.9025	-19.9182	ductal
HP1508501T2D_J9	0.672894	10.9941	alpha
HP1508501T2D_N19	-17.6239	-23.5687	ductal
HP1508501T2D_B11	4.12607	10.3509	alpha
HP1508501T2D_B19	-21.7526	-21.7621	ductal
HP1508501T2D_E10	-0.363723	10.3767	alpha
HP1508501T2D_I18	29.5032	9.20983	delta
HP1508501T2D_M11	-35.1305	-43.4534	acinar
HP1508501T2D_N17	-17.7915	-23.1116	ductal
HP1508501T2D_G12	-28.0063	-38.6914	acinar
HP1508501T2D_C13	3.35169	13.7487	alpha
HP1508501T2D_E22	3.59641	12.3538	alpha
HP1508501T2D_K16	-31.2205	25.1194	gamma
HP1508501T2D_N20	4.82606	9.71098	alpha
HP1508501T2D_M4	4.52935	11.4539	alpha
HP1508501T2D_N2	-20.4449	-18.3233	ductal
HP1508501T2D_K18	-19.5984	-1.29284	endothelial
HP1508501T2D_B8	5.15476	10.5566	alpha
HP1508501T2D_N22	-22.1165	-21.7359	ductal
HP1508501T2D_I16	-3.08161	9.96574	alpha
HP1508501T2D_H13	-20.1866	-17.3097	ductal
HP1508501T2D_M7	-34.3735	-42.0577	acinar
HP1508501T2D_A16	-0.710821	7.3816	alpha
HP1508501T2D_L21	-15.5609	-20.1123	ductal
HP1508501T2D_G19	-34.3256	-42.346	acinar
HP1508501T2D_F1	62.9565	-1.20646	beta
HP1508501T2D_E7	-17.1115	-16.9818	ductal
HP1508501T2D_I11	-16.8613	-19.8493	ductal
HP1508501T2D_K7	-18.2233	-18.6669	ductal
HP1508501T2D_O9	-18.3419	-18.0733	ductal
HP1508501T2D_H12	22.0615	16.8308	mast
HP1508501T2D_K4	-1.29377	12.3287	alpha
HP1508501T2D_I17	-18.7265	-17.0906	ductal
HP1508501T2D_O13	-35.0523	-41.5022	acinar
HP1508501T2D_H18	-31.2453	25.0864	gamma
HP1508501T2D_H3	1.04392	8.52193	alpha
HP1508501T2D_C10	2.99996	10.6728	alpha
HP1508501T2D_L11	-18.9255	-23.0304	ductal
HP1508501T2D_B20	62.6776	-0.916678	beta
HP1508501T2D_B4	4.71229	7.17202	alpha
HP1508501T2D_J17	-2.49173	5.48385	alpha
HP1508501T2D_C23	0.183835	6.15092	alpha
HP1508501T2D_K17	3.4525	13.2404	alpha
HP1508501T2D_G14	-18.5908	-20.1998	ductal
HP1508501T2D_D3	-0.620793	10.6929	alpha
HP1508501T2D_D16	-3.31864	13.6231	alpha
HP1508501T2D_B10	-31.2159	25.0585	gamma
HP1508501T2D_J13	-19.2208	-19.3747	ductal
HP1508501T2D_P8	0.279427	8.43513	alpha
HP1508501T2D_N18	-33.2209	24.9306	gamma
HP1508501T2D_G5	62.1944	-2.27011	beta
HP1508501T2D_M18	-27.8892	-38.9243	acinar
HP1508501T2D_A7	-18.3745	-25.3305	ductal
HP1508501T2D_I22	6.38408	10.8197	alpha
HP1508501T2D_G20	3.19914	6.89608	alpha
HP1508501T2D_K12	2.75109	10.9371	alpha
HP1508501T2D_J20	-2.94398	12.1747	alpha
HP1508501T2D_K6	-28.6683	-39.8459	acinar
HP1508501T2D_J4	3.50103	11.461	alpha
HP1508501T2D_M14	60.7723	-1.45538	beta
HP1508501T2D_F21	-34.7295	-40.0079	acinar
HP1508501T2D_C19	-15.315	-20.4433	ductal
HP1508501T2D_E8	3.3661	9.99322	alpha
HP1508501T2D_I23	29.5259	9.18084	delta
HP1508501T2D_M8	-1.06114	7.00007	alpha
HP1508501T2D_E17	-20.1866	-16.9458	ductal
HP1508501T2D_F7	61.7043	-1.80169	beta
HP1508501T2D_E19	0.181934	5.96226	alpha
HP1508501T2D_H16	-34.5712	-42.7647	acinar
HP1508501T2D_J12	3.17948	7.60219	alpha
HP1508501T2D_F9	7.0038	13.5397	alpha
HP1508501T2D_G17	-34.3435	-42.4842	acinar
HP1508501T2D_F15	-16.6158	-18.8755	ductal
HP1508501T2D_C15	-18.588	-16.9676	ductal
HP1508501T2D_N4	-1.94499	7.32459	alpha
HP1508501T2D_I10	-27.8263	-39.3339	acinar
HP1508501T2D_I14	1.35175	13.0943	alpha
HP1508501T2D_N15	-18.071	-17.3095	ductal
HP1508501T2D_L23	-20.063	-15.2943	ductal
HP1508501T2D_J3	-0.163487	9.57765	alpha
HP1508501T2D_E4	-28.4869	-39.9196	acinar
HP1508501T2D_G21	0.345831	11.6726	alpha
HP1508501T2D_H23	5.23162	10.8897	alpha
HP1508501T2D_L2	-34.6398	-40.2413	acinar
HP1508501T2D_D9	-28.3173	-39.0037	acinar
HP1508501T2D_D21	-2.42066	4.92185	alpha
HP1508501T2D_G18	-34.2509	-41.5025	acinar
HP1508501T2D_E23	-0.78848	5.7876	alpha
HP1508501T2D_D14	-1.81202	6.66065	alpha
HP1508501T2D_O8	-20.6179	-16.2874	ductal
HP1508501T2D_K15	-21.4938	-16.2661	ductal
HP1508501T2D_J22	-21.7193	-21.7664	ductal
HP1508501T2D_F18	-3.04174	12.4267	alpha
HP1508501T2D_N23	-20.0987	-15.3827	ductal
HP1508501T2D_A17	-18.26	-21.9487	ductal
HP1508501T2D_C11	-17.6472	-19.742	ductal
HP1508501T2D_P2	-26.403	-34.4074	acinar
HP1508501T2D_C8	29.3215	9.0593	delta
HP1508501T2D_D13	4.67773	11.336	alpha
HP1508501T2D_F5	-26.488	-24.5349	ductal
HP1508501T2D_A4	-0.505395	14.1408	alpha
HP1508501T2D_L17	2.05907	4.92666	alpha
HP1508501T2D_D15	2.32071	4.56256	alpha
HP1508501T2D_B14	-28.7389	-39.6436	acinar
HP1508501T2D_F11	-31.2403	24.9877	gamma
HP1508501T2D_C16	29.4556	8.23868	delta
HP1508501T2D_C18	-18.0809	-22.211	ductal
HP1508501T2D_O12	-17.7663	-22.7232	ductal
HP1508501T2D_J14	-19.2296	-19.0991	ductal
HP1508501T2D_G6	-2.65837	14.5757	alpha
HP1508501T2D_L5	-17.0534	-19.8891	ductal
HP1508501T2D_M23	-16.4987	-14.6531	ductal
HP1508501T2D_J5	1.43914	10.2438	alpha
HP1508501T2D_N10	-17.5224	-20.0927	ductal
HP1508501T2D_K23	-18.5921	-19.9183	ductal
HP1508501T2D_N11	2.06491	9.25702	alpha
HP1508501T2D_F23	4.70024	8.75278	alpha
HP1508501T2D_D11	2.94056	7.12665	alpha
HP1508501T2D_M12	3.07428	8.73856	alpha
HP1508501T2D_I4	-19.5134	-17.6101	ductal
HP1508501T2D_K19	2.99716	11.4347	alpha
HP1508501T2D_N6	-18.1007	-18.4907	ductal
HP1508501T2D_J6	60.9857	-1.45755	beta
HP1508501T2D_B12	2.78787	8.42031	alpha
HP1508501T2D_K14	0.976665	11.1458	alpha
HP1508501T2D_N5	7.53787	13.9553	alpha
HP1508501T2D_J16	-20.5665	-20.3411	ductal
HP1508501T2D_H10	1.76929	12.6187	alpha
HP1508501T2D_M5	6.7735	11.1315	alpha
HP1508501T2D_H21	-2.87293	10.7323	alpha
HP1508501T2D_D18	-28.3507	-36.9134	acinar
HP1508501T2D_G13	-20.9394	-16.2561	ductal
HP1508501T2D_N21	-34.7223	-39.8503	acinar
HP1508501T2D_F2	5.74336	7.48544	alpha
HP1508501T2D_J8	-1.94521	9.85933	alpha
HP1508501T2D_P6	-0.440159	11.7269	alpha
HP1508501T2D_C4	61.8101	-1.3486	beta
HP1508501T2D_H15	5.98729	15.1328	alpha
HP1508501T2D_G23	-34.653	-40.7845	acinar
HP1508501T2D_A14	2.78177	6.55809	alpha
HP1508501T2D_I7	-33.8423	-41.7431	acinar
HP1508501T2D_A12	1.58921	7.94408	alpha
HP1508501T2D_O11	-34.1495	-40.1284	acinar
HP1508501T2D_B3	0.862236	13.4492	alpha
HP1508501T2D_A15	-0.748738	13.2135	alpha
HP1508501T2D_I12	-19.3749	-17.9187	ductal
HP1508501T2D_J1	-0.905123	8.26845	alpha
HP1508501T2D_A11	-35.0723	-41.7178	acinar
HP1508501T2D_H14	-26.4348	-24.4974	ductal
HP1508501T2D_K9	0.942586	10.2797	alpha
HP1508501T2D_E21	-0.252857	5.12151	alpha
HP1508501T2D_J18	29.459	8.77079	delta
HP1508501T2D_E11	-18.6622	-22.1845	ductal
HP1508501T2D_F20	-0.0304405	5.87486	alpha
HP1508501T2D_G4	1.58466	12.1023	alpha
HP1508501T2D_I13	-16.0195	-19.3459	ductal
HP1508501T2D_D8	2.91956	11.2656	alpha
HP1508501T2D_L9	-18.6153	-18.5631	ductal
HP1508501T2D_E9	-16.9802	-17.9791	ductal
HP1508501T2D_C17	-2.92819	19.1749	beta
HP1508501T2D_D22	-22.1762	-21.7938	ductal
HP1508501T2D_E16	-21.928	-17.6439	ductal
HP1508501T2D_D10	-0.957364	13.1276	alpha
HP1508501T2D_B16	61.2149	0.708605	beta
HP1508501T2D_G22	-32.8752	24.9601	gamma
HP1508501T2D_E13	-2.91767	11.7976	alpha
HP1508501T2D_I21	-15.3636	-17.957	ductal
HP1508501T2D_K3	-18.8734	-22.8739	ductal
HP1508501T2D_N8	-17.5054	-17.7886	ductal
HP1508501T2D_J15	-19.6555	-21.3739	ductal
HP1506401_I2	-29.9568	23.1158	gamma
HP1506401_G3	-3.53511	-2.09145	alpha
HP1506401_K1	62.8992	-6.49468	beta
HP1506401_I1	-29.9902	22.0268	gamma
HP1506401_G2	-6.37616	-31.4354	ductal
HP1506401_K2	-28.067	-42.5127	acinar
HP1506401_M1	-30.4275	-42.4903	acinar
HP1506401_G1	-3.60799	-3.8477	alpha
HP1506401_O2	-8.78172	-31.1348	ductal
HP1506401_D14	-28.0548	-46.0138	acinar
HP1506401_A9	-32.4216	-42.5539	acinar
HP1506401_B22	-29.9498	22.2289	gamma
HP1506401_N10	-9.4082	-30.6953	ductal
HP1506401_D15	-9.01387	-31.1979	ductal
HP1506401_J9	-26.9642	-43.3511	acinar
HP1506401_K12	-2.37651	-4.7162	alpha
HP1506401_N1	-29.4385	-41.6018	acinar
HP1506401_G14	-31.4788	-49.6809	acinar
HP1506401_O16	-29.6468	-48.1553	acinar
HP1506401_D3	-32.152	-50.4323	acinar
HP1506401_E23	-31.7645	-49.993	acinar
HP1506401_G21	-6.22511	-27.2745	ductal
HP1506401_B17	-5.15996	-29.0836	ductal
HP1506401_N9	-31.8302	-50.6595	acinar
HP1506401_J5	-9.87485	-29.4573	ductal
HP1506401_C9	61.9409	-5.29985	beta
HP1506401_J19	59.0429	-6.05166	beta
HP1506401_L19	-29.7063	-47.9375	acinar
HP1506401_M16	-7.19764	-27.6653	ductal
HP1506401_H15	-29.378	-47.2826	acinar
HP1506401_A18	-8.24135	-28.1201	ductal
HP1506401_H16	-28.0268	-46.8715	acinar
HP1506401_C24	-27.1105	-42.2589	acinar
HP1506401_E6	-15.4083	-22.5481	ductal
HP1506401_I14	-29.9687	23.9167	gamma
HP1506401_J2	-27.1848	-43.2056	acinar
HP1506401_F13	-1.32147	-3.55057	alpha
HP1506401_B1	-29.3969	-46.4699	acinar
HP1506401_H4	-6.8546	-28.6731	ductal
HP1506401_I15	-30.946	-41.8183	acinar
HP1506401_O4	-5.85355	-28.2888	ductal
HP1506401_L7	-27.3639	-46.671	acinar
HP1506401_D24	-28.5286	-41.3106	acinar
HP1506401_L21	-9.45095	-31.1301	ductal
HP1506401_J24	-28.3935	-47.0449	acinar
HP1506401_G8	-30.8025	22.5979	gamma
HP1506401_F12	60.7429	-7.78659	beta
HP1506401_J6	-29.138	-47.0213	acinar
HP1506401_N5	-32.7698	-50.9843	acinar
HP1506401_I24	-7.77154	-31.0622	ductal
HP1506401_E20	-27.4377	-43.8964	acinar
HP1506401_F24	61.3079	-6.39515	beta
HP1506401_F8	62.1516	-6.93242	beta
HP1506401_F16	-26.8499	-42.1277	acinar
HP1506401_F21	-8.96493	-28.7259	ductal
HP1506401_M18	-28.9865	-49.4455	acinar
HP1506401_I13	-27.6977	-43.6697	acinar
HP1506401_J8	-8.77187	-30.7593	ductal
HP1506401_K17	-5.83455	-29.1993	ductal
HP1506401_O24	-27.3824	-46.9577	acinar
HP1506401_L18	-30.3861	-45.2891	acinar
HP1506401_H18	-31.7337	-42.5805	acinar
HP1506401_F2	-31.1867	-41.6331	acinar
HP1506401_A5	-3.30141	-5.02019	alpha
HP1506401_N20	62.532	-5.61845	beta
HP1506401_M4	-28.3679	-42.7946	acinar
HP1506401_J3	-33.2728	-50.5218	acinar
HP1506401_N16	-8.48229	-29.8252	ductal
HP1506401_L22	-33.4455	-51.0903	acinar
HP1506401_D8	-8.33945	-28.7129	ductal
HP1506401_H7	-11.2657	-29.182	ductal
HP1506401_M21	-5.24387	-30.6323	ductal
HP1506401_E15	-3.50775	-4.21935	alpha
HP1506401_P11	-7.84889	-33.3307	ductal
HP1506401_L10	-11.5065	-30.4758	ductal
HP1506401_N24	-29.7131	-42.0921	acinar
HP1506401_P5	-11.2894	-28.5346	ductal
HP1506401_E12	-30.0067	22.4904	gamma
HP1506401_B4	-30.1278	23.2169	gamma
HP1506401_L20	-5.2179	-29.2743	ductal
HP1506401_C17	-6.79042	-28.5358	ductal
HP1506401_M19	-30.5762	-49.2001	acinar
HP1506401_J7	-4.46356	-30.167	ductal
HP1506401_J23	-32.5351	-43.416	acinar
HP1506401_D2	-5.03758	-29.9076	ductal
HP1506401_G18	-8.82314	-30.0039	ductal
HP1506401_J17	60.8271	-5.66635	beta
HP1506401_B5	-27.6347	-43.7591	acinar
HP1506401_K6	-26.836	-42.4534	acinar
HP1506401_E17	-10.7071	-29.6912	ductal
HP1506401_N4	-3.0001	-4.58569	alpha
HP1506401_G19	-4.8001	-30.0263	ductal
HP1506401_O21	-31.9994	-49.0035	acinar
HP1506401_H14	-1.61478	-3.62265	alpha
HP1506401_L9	-27.9119	-43.195	acinar
HP1506401_K23	-29.7182	22.7424	gamma
HP1506401_L4	-7.18858	-27.7806	ductal
HP1506401_E18	-29.1564	-46.6114	acinar
HP1506401_L13	-6.0104	-29.169	ductal
HP1506401_G4	-30.8955	-42.6859	acinar
HP1506401_I17	-30.867	21.9187	gamma
HP1506401_H6	-11.178	-27.6151	ductal
HP1506401_O23	-3.29769	-4.10741	alpha
HP1506401_F10	-8.18383	-29.5209	ductal
HP1506401_I4	-5.70231	-30.7551	ductal
HP1506401_I23	61.2013	-7.09938	beta
HP1506401_F18	61.5194	-5.33069	beta
HP1506401_D17	-10.5271	-30.6008	ductal
HP1506401_O10	62.3541	-5.17959	beta
HP1506401_P22	-8.45557	-30.0495	ductal
HP1506401_J4	-4.50207	-4.69679	alpha
HP1506401_D12	-29.002	-46.3746	acinar
HP1506401_O8	-7.87088	-33.3274	ductal
HP1506401_C15	62.422	-6.90415	beta
HP1506401_B14	-32.4794	-50.5452	acinar
HP1506401_P17	-30.929	-50.1381	acinar
HP1506401_C4	62.307	-6.55058	beta
HP1506401_B16	-31.819	-49.2146	acinar
HP1506401_I21	-7.07529	-29.1229	ductal
HP1506401_I6	-30.962	-49.417	acinar
HP1506401_P19	-2.63296	-3.26695	alpha
HP1506401_K22	-29.3393	23.1435	gamma
HP1506401_F19	-9.88404	-28.7942	ductal
HP1506401_N19	-4.55372	-2.37827	alpha
HP1506401_G9	61.8808	-6.36016	beta
HP1506401_K15	-33.3179	-50.9328	acinar
HP1506401_A20	-9.84344	-27.0408	ductal
HP1506401_A21	-3.15336	-4.20903	alpha
HP1506401_L1	-9.65268	-30.1142	ductal
HP1506401_C13	-32.0375	-50.5488	acinar
HP1506401_A15	59.0232	-6.02787	beta
HP1506401_O7	-30.825	-41.1867	acinar
HP1506401_G20	-9.28541	-28.9597	ductal
HP1506401_A4	-3.81442	-27.4762	ductal
HP1506401_D9	-30.3641	22.3131	gamma
HP1506401_P1	-3.89181	-27.8179	ductal
HP1506401_O3	-4.09059	-3.91257	alpha
HP1506401_L17	-30.2008	22.2098	gamma
HP1506401_H13	-2.75485	-2.60673	alpha
HP1506401_K14	-31.6351	-49.5212	acinar
HP1506401_O11	59.9688	-6.16253	beta
HP1506401_J20	-10.6984	-27.7033	ductal
HP1506401_I11	61.7407	-5.60447	beta
HP1506401_M17	-27.1827	-44.4828	acinar
HP1506401_C5	-0.79151	-2.12793	alpha
HP1506401_L5	60.7367	-5.36123	beta
HP1506401_P12	61.3637	-6.16247	beta
HP1506401_J14	-31.4357	-41.6273	acinar
HP1506401_N15	-27.3493	-46.9127	acinar
HP1506401_E16	29.7135	5.95243	delta
HP1506401_P21	-5.33954	-28.7015	ductal
HP1506401_F11	60.0676	-5.29692	beta
HP1506401_O18	-32.5814	-50.2435	acinar
HP1506401_H2	-18.4532	-15.965	ductal
HP1506401_K19	-8.23415	-29.0814	ductal
HP1506401_F5	-28.6343	-43.4435	acinar
HP1506401_C16	-8.34599	-30.6439	ductal
HP1506401_K4	-9.76267	-31.4648	ductal
HP1506401_L3	-29.5593	-46.5	acinar
HP1506401_N11	60.717	-5.03109	beta
HP1506401_F23	-5.82844	-28.5158	ductal
HP1506401_P3	-3.75951	-4.4934	alpha
HP1506401_I8	-2.90471	-4.01442	alpha
HP1506401_A24	60.7584	-6.75469	beta
HP1506401_A7	-31.6532	-48.2765	acinar
HP1506401_G5	-3.3835	-3.82735	alpha
HP1506401_K21	60.7781	-6.39374	beta
HP1506401_G11	29.6971	6.09185	delta
HP1506401_K16	-9.17862	-30.2368	ductal
HP1506401_M8	-30.0744	-44.7572	acinar
HP1506401_A6	-31.0551	-49.895	acinar
HP1506401_H23	-11.0704	-29.9887	ductal
HP1506401_I18	-28.5645	-49.5033	acinar
HP1506401_B24	-5.88131	-30.5739	ductal
HP1506401_F3	-29.0864	-41.5193	acinar
HP1506401_D13	61.2523	-6.72714	beta
HP1506401_E24	-32.5773	-49.8079	acinar
HP1506401_C8	61.6703	-7.28484	beta
HP1506401_E8	-27.0255	-46.8793	acinar
HP1506401_G23	-6.00328	-30.9769	ductal
HP1506401_N17	-4.79905	-30.9927	ductal
HP1506401_F9	60.231	-5.96533	beta
HP1506401_L23	-2.21751	-3.89309	alpha
HP1506401_M6	-30.2172	23.501	gamma
HP1506401_F17	-3.85892	-2.80132	alpha
HP1506401_J15	-27.2662	-42.7574	acinar
HP1506401_I10	-30.0136	-47.2978	acinar
HP1506401_G16	-28.7784	-47.0859	acinar
HP1506401_M12	-0.562988	-1.91194	alpha
HP1506401_P23	-32.001	-49.8996	acinar
HP1506401_P14	61.7037	-6.68874	beta
HP1506401_M11	-9.00538	-30.3462	ductal
HP1506401_E11	-4.36074	-4.48996	alpha
HP1506401_B6	-29.8592	-42.6817	acinar
HP1506401_N22	-30.1679	-48.6368	acinar
HP1506401_J16	-28.3711	21.4124	epsilon
HP1506401_B3	-29.528	22.4361	gamma
HP1506401_C7	-28.4046	-43.1749	acinar
HP1506401_A12	-11.8278	-29.2471	ductal
HP1506401_J22	-3.81228	-27.8118	ductal
HP1506401_C23	-33.1117	-50.5117	acinar
HP1506401_G6	62.0963	-6.1194	beta
HP1506401_G13	-3.08701	-3.3636	alpha
HP1506401_H1	-27.6925	-43.871	acinar
HP1506401_G24	-3.61932	-2.29585	alpha
HP1506401_H9	-5.44831	-27.6397	ductal
HP1506401_N23	-27.9527	-45.2619	acinar
HP1506401_H22	-3.46645	-3.84779	alpha
HP1506401_H3	-33.4474	-43.1804	acinar
HP1506401_A17	60.945	-5.95388	beta
HP1506401_L11	-29.9421	-48.3489	acinar
HP1506401_J21	-10.4694	-27.6972	ductal
HP1506401_P4	-11.5005	-30.0513	ductal
HP1506401_O12	-31.2906	-49.2552	acinar
HP1506401_J11	-32.5738	-42.9773	acinar
HP1506401_B23	-7.68039	-32.1785	ductal
HP1506401_I12	60.3546	-6.51102	beta
HP1506401_G12	61.7442	-7.17727	beta
HP1506401_D1	-5.45581	-28.6987	ductal
HP1506401_P10	-30.3243	-45.1915	acinar
HP1506401_B11	61.0763	-5.24738	beta
HP1506401_H19	-29.1554	22.8102	gamma
HP1506401_D7	-4.30379	-28.1774	ductal
HP1507101_E2	13.0191	-9.61543	alpha
HP1507101_C2	5.23763	-6.07922	alpha
HP1507101_O1	8.03825	-10.4921	alpha
HP1507101_I2	6.82358	-5.86277	alpha
HP1507101_M2	17.6272	-7.23789	alpha
HP1507101_G16	9.49715	-7.05346	alpha
HP1507101_N9	12.6886	-6.43821	alpha
HP1507101_F7	13.4453	-5.21411	alpha
HP1507101_B3	9.93975	-9.36754	alpha
HP1507101_M12	17.6592	-7.14772	alpha
HP1507101_D14	6.60509	-10.8234	alpha
HP1507101_O22	17.3026	-8.09266	alpha
HP1507101_O23	27.2407	9.46731	delta
HP1507101_J15	-13.9026	-24.476	ductal
HP1507101_L22	57.2729	3.75333	beta
HP1507101_D6	59.4756	5.3895	beta
HP1507101_O16	5.40768	-11.5035	alpha
HP1507101_L11	11.3439	-8.62135	alpha
HP1507101_P2	58.8073	3.54094	beta
HP1507101_K16	-13.6712	-24.7722	ductal
HP1507101_L24	58.9386	6.03513	beta
HP1507101_O20	12.0496	-9.29528	alpha
HP1507101_A14	10.8887	-5.83881	alpha
HP1507101_I17	6.15628	-11.7463	alpha
HP1507101_F19	6.5429	-13.3766	alpha
HP1507101_G6	15.394	-10.6603	alpha
HP1507101_L7	7.5097	-12.8457	alpha
HP1507101_F14	58.2157	3.19402	beta
HP1507101_H7	8.51791	-11.2111	alpha
HP1507101_H1	5.6866	-7.84743	alpha
HP1507101_O5	7.23166	-9.79807	alpha
HP1507101_F22	7.54428	-13.1717	alpha
HP1507101_A22	26.4978	-17.6799	alpha
HP1507101_L5	13.7541	-12.3005	alpha
HP1507101_A20	16.8945	-11.7185	alpha
HP1507101_F16	7.51065	-9.76949	alpha
HP1507101_P10	16.2489	-12.4005	alpha
HP1507101_B23	26.5645	-17.6975	alpha
HP1507101_H11	8.67351	-5.37009	alpha
HP1507101_G12	6.95591	-7.54858	alpha
HP1507101_N5	58.8298	5.57333	beta
HP1507101_G14	10.5921	-10.2646	alpha
HP1507101_K23	59.428	4.58044	beta
HP1507101_I8	8.58034	-8.05545	alpha
HP1507101_L2	9.19767	-10.2692	alpha
HP1507101_H15	7.00336	-11.8973	alpha
HP1507101_F11	58.3262	4.16182	beta
HP1507101_D2	10.153	-9.31144	alpha
HP1507101_H4	60.144	4.30228	beta
HP1507101_P12	15.0647	-12.7219	alpha
HP1507101_F20	10.3778	-7.15617	alpha
HP1507101_E24	12.9407	-10.9411	alpha
HP1507101_I16	8.39147	-9.7739	alpha
HP1507101_B18	17.1335	-8.82005	alpha
HP1507101_H14	6.8587	-11.3185	alpha
HP1507101_D22	58.7642	4.3714	beta
HP1507101_H9	4.26986	-8.36905	alpha
HP1507101_C7	59.2898	5.66281	beta
HP1507101_J24	11.7618	-4.31666	alpha
HP1507101_G18	6.1478	-9.06267	alpha
HP1507101_E22	-31.7437	-48.0342	acinar
HP1507101_G10	-12.2757	-25.6077	ductal
HP1507101_E20	14.372	-10.4781	alpha
HP1507101_I13	4.5342	-11.5471	alpha
HP1507101_J11	5.42139	-9.15816	alpha
HP1507101_P4	7.94918	-7.26219	alpha
HP1507101_E6	11.3998	-8.87012	alpha
HP1507101_G22	10.6396	-5.85137	alpha
HP1507101_C4	9.71696	-10.4702	alpha
HP1507101_J18	9.15045	-11.6565	alpha
HP1507101_H16	-14.7523	-24.4931	ductal
HP1507101_C18	11.3376	-12.1751	alpha
HP1507101_K8	15.3998	-8.36862	alpha
HP1507101_D3	59.0515	3.82467	beta
HP1507101_A12	58.4305	5.26708	beta
HP1507101_N19	8.10253	-11.8419	alpha
HP1507101_I11	12.9961	-5.31639	alpha
HP1507101_L18	17.1485	-8.40139	alpha
HP1507101_L3	8.21226	-8.7645	alpha
HP1507101_E8	4.42464	-10.0704	alpha
HP1507101_J13	4.38573	-11.7158	alpha
HP1507101_A4	9.97977	-9.19183	alpha
HP1507101_J23	7.58412	-7.35129	alpha
HP1507101_I12	57.7635	4.03895	beta
HP1507101_K4	12.3307	-8.97814	alpha
HP1507101_J7	-32.1879	-41.8959	acinar
HP1507101_F3	8.47214	-12.2798	alpha
HP1507101_L23	27.0745	10.4173	delta
HP1507101_P5	10.6641	-4.10949	alpha
HP1507101_M4	6.69338	-7.51047	alpha
HP1507101_B7	14.3627	-9.58933	alpha
HP1507101_E10	14.8007	-6.33387	alpha
HP1507101_H23	5.56062	-8.18536	alpha
HP1507101_K3	9.65283	-5.9739	alpha
HP1507101_J19	58.1656	5.864	beta
HP1507101_I4	5.86188	-12.2636	alpha
HP1507101_G23	9.0564	-8.40216	alpha
HP1507101_F15	-14.8111	-24.6097	ductal
HP1507101_D1	11.1615	-4.65178	alpha
HP1507101_J1	10.2549	-4.95718	alpha
HP1507101_F10	27.941	9.53068	delta
HP1507101_D8	7.66003	-7.65669	alpha
HP1507101_I22	12.9346	-5.0186	alpha
HP1507101_B1	11.5907	-7.48308	alpha
HP1507101_N16	8.51726	-10.1137	alpha
HP1507101_A6	58.3706	4.40953	beta
HP1507101_F2	6.59471	-10.7139	alpha
HP1507101_F8	8.29242	-8.13455	alpha
HP1507101_P21	27.2116	9.55492	delta
HP1507101_B14	16.1668	-10.6494	alpha
HP1507101_N4	26.4817	-17.6741	alpha
HP1507101_N6	59.7868	5.09713	beta
HP1507101_L19	10.7318	-12.4285	alpha
HP1507101_A5	27.5491	9.85476	delta
HP1507101_F18	11.2798	-12.2596	alpha
HP1507101_M18	14.2888	-11.418	alpha
HP1507101_H6	13.6441	-6.44372	alpha
HP1507101_O12	-14.8133	-24.4108	ductal
HP1507101_G13	12.5744	-11.9042	alpha
HP1507101_N20	12.2091	-7.85003	alpha
HP1507101_G8	13.3772	-10.1511	alpha
HP1507101_D18	12.7667	-6.54812	alpha
HP1507101_O3	57.7375	3.41193	beta
HP1507101_N1	5.82874	-13.7872	alpha
HP1507101_P23	12.4732	-8.72659	alpha
HP1507101_L16	58.2716	4.7359	beta
HP1507101_K15	58.0812	4.75815	beta
HP1507101_N13	57.5295	2.50586	beta
HP1507101_C5	10.3953	-4.78797	alpha
HP1507101_E14	57.7386	4.61664	beta
HP1507101_J2	5.93058	-6.23223	alpha
HP1507101_B13	10.4343	-3.81533	alpha
HP1507101_H12	13.1971	-5.4006	alpha
HP1507101_I19	9.4912	-13.0236	alpha
HP1507101_H22	14.2829	-9.95443	alpha
HP1507101_B4	8.42365	-6.59189	alpha
HP1507101_F13	13.6593	-11.293	alpha
HP1507101_J20	58.5307	2.83966	beta
HP1507101_N8	-13.7681	-24.4081	ductal
HP1507101_B19	11.7708	-6.37843	alpha
HP1507101_D12	8.39492	-7.58156	alpha
HP1507101_M8	59.2871	4.55103	beta
HP1507101_L4	27.9057	10.1546	delta
HP1507101_D5	6.5299	-8.84236	alpha
HP1507101_B24	5.13007	-9.91318	alpha
HP1507101_J21	10.5913	-7.45388	alpha
HP1507101_I18	60.9574	1.47299	beta
HP1507101_B6	7.53441	-6.62147	alpha
HP1507101_D15	8.61934	-11.9295	alpha
HP1507101_M22	-29.1857	28.0031	gamma
HP1507101_B12	14.9557	-11.6708	alpha
HP1507101_H17	58.6271	3.96432	beta
HP1507101_C12	57.1593	3.68299	beta
HP1507101_D10	-19.4998	-1.57633	endothelial
HP1507101_L17	-31.2245	-40.5497	acinar
HP1507101_N2	5.90369	-9.80529	alpha
HP1507101_F5	17.717	-6.98676	alpha
HP1507101_E12	15.0186	-6.35941	alpha
HP1507101_H3	15.1288	-12.2096	alpha
HP1507101_P1	-14.1205	-24.24	ductal
HP1507101_O14	56.5263	2.81593	beta
HP1507101_L14	6.40427	-10.2552	alpha
HP1507101_D23	58.4055	5.20475	beta
HP1507101_I6	7.64843	-11.9199	alpha
HP1507101_J17	12.818	-5.37686	alpha
HP1507101_F1	13.621	-10.5321	alpha
HP1507101_E9	17.0941	-8.79138	alpha
HP1507101_C14	7.7339	-13.1258	alpha
HP1507101_J3	10.7288	-4.6939	alpha
HP1507101_D17	7.8916	-10.0357	alpha
HP1507101_B16	14.7646	-11.7539	alpha
HP1507101_J5	12.784	-10.7439	alpha
HP1507101_O13	7.83544	-9.34348	alpha
HP1507101_E7	12.075	-10.6086	alpha
HP1507101_F23	57.5828	4.10489	beta
HP1507101_I20	5.99716	-6.49109	alpha
HP1507101_I5	7.23578	-10.7857	alpha
HP1507101_O19	59.4834	3.35184	beta
HP1507101_H5	9.96783	-10.6283	alpha
HP1507101_B5	58.7692	3.7582	beta
HP1507101_F4	58.154	3.58297	beta
HP1507101_P3	6.97809	-8.08414	alpha
HP1507101_B20	-29.1923	28.0023	gamma
HP1507101_G15	12.7811	-10.7729	alpha
HP1507101_O11	6.77323	-8.92582	alpha
HP1507101_C8	10.4162	-10.1802	alpha
HP1507101_L21	11.4918	-10.9241	alpha
HP1507101_F12	27.7678	8.15146	delta
HP1507101_J22	13.0942	-9.03639	alpha
HP1507101_O8	60.0374	3.86837	beta
HP1507101_P8	12.3056	-11.566	alpha
HP1509101_E3	-21.9526	-15.9105	ductal
HP1509101_A3	13.3261	-17.6479	alpha
HP1509101_O1	26.7471	9.59681	delta
HP1509101_D5	14.6084	-15.2964	alpha
HP1509101_J22	-12.2247	-22.5088	ductal
HP1509101_I17	-19.4773	-1.62184	endothelial
HP1509101_K19	-12.0932	-24.55	ductal
HP1509101_J16	26.5006	10.0731	delta
HP1509101_G19	15.5359	-15.0539	alpha
HP1509101_D18	56.7843	5.11296	beta
HP1509101_P4	14.4919	-14.3251	alpha
HP1509101_J12	13.0371	-13.6763	alpha
HP1509101_K15	-14.9848	-25.7615	ductal
HP1509101_A7	12.628	-17.0054	alpha
HP1509101_H1	26.3478	-17.6302	alpha
HP1509101_L17	13.612	-19.3071	alpha
HP1509101_B16	-30.4466	-39.504	acinar
HP1509101_P17	-12.7594	-25.248	ductal
HP1509101_P9	4.12121	-17.1631	ductal
HP1509101_L13	-13.465	-25.5797	ductal
HP1509101_E4	28.0446	11.3696	delta
HP1509101_H21	12.9957	-17.7254	alpha
HP1509101_L8	8.45403	27.0164	alpha
HP1509101_I5	11.371	-17.0839	alpha
HP1509101_K22	12.602	-17.7394	alpha
HP1509101_H7	26.6903	9.59256	delta
HP1509101_O9	16.2846	-13.1069	alpha
HP1509101_D17	-14.7515	-26.4225	ductal
HP1509101_K9	57.006	5.33505	beta
HP1509101_O7	10.527	-13.8689	alpha
HP1509101_D8	17.1234	-11.73	alpha
HP1509101_F18	-30.4989	-39.3856	acinar
HP1509101_H22	11.3118	-17.5037	alpha
HP1509101_L11	14.3114	-14.9493	alpha
HP1509101_D22	26.7139	10.6508	delta
HP1509101_H23	9.25651	-14.829	alpha
HP1509101_I10	10.837	-16.3244	alpha
HP1509101_G18	10.8266	-14.5931	alpha
HP1509101_M12	12.7239	-15.8931	alpha
HP1509101_J9	-15.9666	-26.4496	ductal
HP1509101_B19	-14.8325	-26.3561	ductal
HP1509101_D23	-12.6383	-25.157	ductal
HP1509101_P20	13.9837	-18.0296	alpha
HP1509101_L19	26.4439	9.09028	delta
HP1509101_F21	-29.1835	27.9747	gamma
HP1509101_C23	56.931	5.65028	beta
HP1509101_P18	14.2351	-17.7122	alpha
HP1509101_N9	12.4768	-17.2132	alpha
HP1509101_B20	10.7743	-16.5639	alpha
HP1509101_N18	13.2074	-18.5211	alpha
HP1509101_N17	16.0465	-13.2642	alpha
HP1509101_G9	57.1605	5.38532	beta
HP1509101_C22	14.1177	-17.4111	alpha
HP1509101_E19	12.8535	-13.6161	alpha
HP1509101_J8	9.98137	-13.0368	alpha
HP1509101_D19	14.4723	-8.9679	alpha
HP1509101_J4	12.6671	-17.8271	alpha
HP1509101_I21	14.9136	-16.1943	alpha
HP1509101_P12	26.8278	9.76578	delta
HP1509101_O13	13.1531	-15.1876	alpha
HP1509101_J15	14.0779	-15.6482	alpha
HP1509101_J23	-15.0801	-25.9774	ductal
HP1509101_I12	-13.4265	-23.901	ductal
HP1509101_O14	-15.1811	-26.4186	ductal
HP1509101_L16	-11.1078	-24.4031	ductal
HP1509101_F4	13.4067	-16.2095	alpha
HP1509101_K10	-11.4786	-25.5204	ductal
HP1509101_J20	12.3495	-18.3328	alpha
HP1509101_B13	56.2127	3.84809	beta
HP1509101_O18	57.4843	6.7754	beta
HP1509101_F19	13.8715	-17.4192	alpha
HP1509101_N23	56.7289	6.14136	beta
HP1509101_B23	-12.1188	-23.5969	ductal
HP1509101_A8	-15.6992	-26.4958	ductal
HP1509101_E22	56.5716	5.31983	beta
HP1509101_I23	10.5119	-14.5072	alpha
HP1509101_C21	-14.7828	-26.126	ductal
HP1509101_J19	55.8603	6.11203	beta
HP1509101_P8	4.10121	-17.1552	ductal
HP1509101_L14	56.9566	6.54102	beta
HP1509101_O16	12.7372	-17.602	alpha
HP1509101_F22	-14.0816	-25.2488	ductal
HP1509101_N20	15.3073	-14.2943	alpha
HP1509101_H13	26.5438	10.3304	delta
HP1509101_G16	12.058	-17.4992	alpha
HP1509101_F7	-12.4878	-25.1857	ductal
HP1509101_F23	-19.4895	-1.59691	endothelial
HP1509101_H20	-12.1276	-22.2295	ductal
HP1509101_O4	26.9712	10.2539	delta
HP1509101_M10	12.3095	-15.8919	alpha
HP1509101_B10	11.7343	-18.8115	alpha
HP1509101_L23	26.5676	9.50815	delta
HP1504901_D15	11.499	58.3958	alpha
HP1504901_O20	38.6221	34.6406	beta
HP1504901_K20	34.6098	16.0947	delta
HP1504901_E16	38.8541	32.5745	beta
HP1504901_N9	-29.0137	42.099	gamma
HP1504901_F14	3.31913	51.0875	epsilon
HP1504901_I7	34.5512	15.7382	delta
HP1504901_B15	12.3761	60.3434	alpha
HP1504901_L8	38.5661	33.8762	beta
HP1504901_B3	8.5162	61.9541	alpha
HP1504901_A21	34.4426	15.7899	delta
HP1504901_F15	-27.8285	44.2597	gamma
HP1504901_O11	-29.5595	-8.11525	ductal
HP1504901_N2	7.50555	62.0351	alpha
HP1504901_G20	-27.9291	42.7785	gamma
HP1504901_H12	11.8646	60.2346	alpha
HP1504901_J12	14.9009	59.464	alpha
HP1504901_D12	5.61092	61.7895	alpha
HP1504901_F2	33.8765	17.43	delta
HP1504901_G8	38.5437	33.1423	beta
HP1504901_B22	39.4257	33.1845	beta
HP1504901_F12	13.5069	60.8597	alpha
HP1504901_H10	8.61375	60.1702	alpha
HP1504901_P11	-30.5722	-7.92002	ductal
HP1504901_O7	8.04537	61.3807	alpha
HP1504901_P14	38.3218	33.397	beta
HP1504901_H19	-28.7972	43.6435	gamma
HP1504901_F8	-30.2936	-9.32784	ductal
HP1504901_P21	11.7797	61.9525	alpha
HP1504901_N18	-28.6458	-8.7356	ductal
HP1504901_G24	14.0878	60.9058	alpha
HP1504901_B8	-28.0267	44.324	gamma
HP1504901_N13	37.6406	33.6169	beta
HP1504901_L20	36.8174	31.7417	beta
HP1504901_K12	7.0052	59.5585	alpha
HP1504901_H22	37.618	33.0065	beta
HP1504901_J8	9.47227	56.4507	alpha
HP1504901_C11	5.82819	58.6532	alpha
HP1504901_O1	-26.7769	43.278	gamma
HP1504901_B16	12.7011	59.7992	alpha
HP1504901_L17	38.4142	33.2058	beta
HP1504901_O18	36.4876	32.0022	beta
HP1504901_F18	-28.5971	41.512	gamma
HP1504901_C17	39.7618	34.034	beta
HP1504901_B11	39.109	33.3017	beta
HP1504901_F17	40.4153	32.6133	beta
HP1504901_D6	34.1375	16.5195	delta
HP1504901_D18	3.32243	51.0982	epsilon
HP1504901_K19	38.8214	32.856	beta
HP1504901_P10	10.4147	57.1425	alpha
HP1504901_D16	6.24061	59.6419	alpha
HP1504901_H14	-28.6378	44.2955	gamma
HP1504901_M3	9.21947	59.3939	alpha
HP1504901_F1	-29.5071	43.8584	gamma
HP1504901_I10	-28.9513	-8.86255	ductal
HP1504901_O8	39.3477	34.6918	beta
HP1504901_D23	6.85056	60.71	alpha
HP1504901_I17	-20.2043	0.156793	endothelial
HP1504901_B20	-29.4876	43.6498	gamma
HP1504901_O14	-30.4427	-9.93225	ductal
HP1504901_F13	36.0428	31.1768	beta
HP1504901_M12	15.0225	59.6776	alpha
HP1504901_H17	39.9231	32.5441	beta
HP1504901_H4	11.7692	60.0955	alpha
HP1504901_H5	38.5926	32.7217	beta
HP1504901_P7	-29.5746	-8.11531	ductal
HP1504901_B1	8.94239	61.8134	alpha
HP1504901_F11	39.1671	32.3506	beta
HP1504901_F23	-34.1996	-50.1481	acinar
HP1504901_G9	12.7027	56.1408	alpha
HP1504901_O21	-29.1763	44.1308	gamma
HP1504901_E24	8.96844	61.253	alpha
HP1504901_G12	38.9401	34.5738	beta
HP1504901_A16	38.2761	34.8405	beta
HP1504901_A14	12.9601	59.3531	alpha
HP1504901_O9	10.8491	60.6223	alpha
HP1504901_P3	-20.1653	0.324728	endothelial
HP1504901_G3	8.22192	59.8287	alpha
HP1504901_F5	10.8464	61.0023	alpha
HP1504901_A23	-20.1821	0.247725	endothelial
HP1504901_K1	10.9994	56.8135	alpha
HP1504901_P18	-20.2157	0.419596	endothelial
HP1504901_C16	13.4259	56.9931	alpha
HP1504901_G21	35.8415	31.8931	beta
HP1504901_A5	-26.926	42.9895	gamma
HP1504901_A3	37.5754	33.9218	beta
HP1504901_L18	-29.0475	44.6589	gamma
HP1504901_H11	9.8874	61.7203	alpha
HP1504901_I24	7.03532	57.444	alpha
HP1504901_D13	-34.9655	-30.2349	acinar
HP1504901_E18	12.6523	58.6449	alpha
HP1504901_H6	9.93208	61.4852	alpha
HP1504901_J17	10.9398	57.8528	alpha
HP1504901_N1	9.33449	58.6007	alpha
HP1504901_B4	34.0316	16.4436	delta
HP1504901_J7	39.2801	33.439	beta
HP1504901_D22	10.0419	58.9805	alpha
HP1504901_G4	38.2802	31.922	beta
HP1504901_E6	-29.5253	-9.29069	ductal
HP1504901_D9	-28.3876	43.4903	gamma
HP1504901_N22	6.35443	61.2314	alpha
HP1504901_K14	-27.4679	42.4065	gamma
HP1504901_N15	-29.0989	44.0268	gamma
HP1504901_J20	6.19952	60.1537	alpha
HP1504901_J23	7.08309	61.3413	alpha
HP1504901_L16	-30.3211	-9.60765	ductal
HP1504901_C13	3.3538	51.1815	epsilon
HP1504901_B23	-28.0555	42.0926	gamma
HP1504901_F19	10.5931	59.8988	alpha
HP1504901_J4	34.2523	15.7338	delta
HP1504901_K22	38.2656	33.0302	beta
HP1504901_O5	-26.9956	44.1105	gamma
HP1504901_J9	-27.9421	43.8382	gamma
HP1504901_M4	-28.9218	41.1676	gamma
HP1504901_G2	5.95451	61.0478	alpha
HP1504901_N16	5.51789	60.1865	alpha
HP1504901_G10	-20.1425	0.218222	endothelial
HP1504901_F24	8.28893	58.9378	alpha
HP1504901_O17	8.19895	59.6274	alpha
HP1504901_A19	13.0071	57.4875	alpha
HP1504901_D5	9.89566	61.5196	alpha
HP1504901_D1	3.36131	58.6199	alpha
HP1504901_F16	-20.0688	0.196662	endothelial
HP1504901_B6	-28.6531	43.1912	gamma
HP1504901_E23	-29.6775	42.1921	gamma
HP1504901_N8	37.3376	33.9248	beta
HP1504901_N12	10.2832	62.9894	alpha
HP1504901_M24	7.61182	60.8224	alpha
HP1504901_L1	14.2059	58.0143	alpha
HP1504901_B9	34.2143	16.3657	delta
HP1504901_O4	-35.0017	-29.9598	ductal
HP1504901_O10	9.72922	60.3332	alpha
HP1504901_B18	11.0282	58.8509	alpha
HP1504901_F9	10.2569	59.7173	alpha
HP1504901_F20	11.1825	58.7549	alpha
HP1504901_O6	7.10183	60.1841	alpha
HP1504901_B14	-30.3307	-9.26973	ductal
HP1504901_L13	13.1989	60.6183	alpha
HP1504901_L22	39.0804	31.6108	beta
HP1504901_O24	-28.4496	43.8925	gamma
HP1504901_G13	11.5315	62.9584	alpha
HP1504901_J22	10.715	61.2971	alpha
HP1504901_L14	7.54924	62.297	alpha
HP1504901_A2	12.5821	58.144	alpha
HP1504901_N17	5.25329	61.5279	alpha
HP1504901_L3	-28.8112	43.3672	gamma
HP1504901_I3	7.79438	63.2659	alpha
HP1504901_A9	8.68742	59.6475	alpha
HP1504901_I21	9.4779	59.934	alpha
HP1504901_K23	-30.5096	-7.92902	ductal
HP1504901_G6	10.622	61.8668	alpha
HP1504901_O16	9.9836	60.3244	alpha
HP1504901_E14	12.697	57.5358	alpha
HP1504901_G11	-30.0567	-9.08912	ductal
HP1504901_N24	33.943	16.3074	delta
HP1504901_D17	5.96482	58.8461	alpha
HP1504901_K6	11.6182	61.0887	alpha
HP1504901_D2	6.38819	60.7086	alpha
HP1504901_I18	-27.3967	41.7818	gamma
HP1504901_E21	38.4181	33.9997	beta
HP1504901_H18	37.3146	32.2531	beta
HP1504901_D24	-26.8914	42.7719	gamma
HP1504901_J6	7.14943	58.8878	alpha
HP1504901_I2	7.73679	57.0638	alpha
HP1504901_D14	8.31868	58.1469	alpha
HP1504901_I12	14.8587	59.4555	alpha
HP1504901_P20	14.2438	58.9291	alpha
HP1504901_M18	8.8554	63.5044	alpha
HP1504901_J3	39.4983	33.4128	beta
HP1504901_F4	8.3058	60.4254	alpha
HP1504901_D7	37.1349	31.7048	beta
HP1504901_M21	32.8961	15.9378	delta
HP1504901_B10	40.1563	33.3907	beta
HP1504901_H1	12.8791	58.5116	alpha
HP1504901_J5	-29.6476	-9.37669	ductal
HP1504901_K5	7.68168	63.4836	alpha
HP1504901_F10	12.7854	57.8979	alpha
HP1504901_H16	-34.9968	-30.0112	acinar
HP1504901_G15	12.7231	58.9758	alpha
HP1504901_H2	14.1896	61.0518	alpha
HP1504901_G18	36.5078	32.0237	beta
HP1504901_N19	5.57024	61.6034	alpha
HP1504901_L21	14.1187	26.4128	alpha
HP1504901_C10	34.0561	16.5111	delta
HP1504901_I8	6.07352	61.4869	alpha
HP1504901_I22	-28.4589	41.1148	gamma
HP1504901_B21	7.70036	60.3381	alpha
HP1504901_N7	7.94504	59.2269	alpha
HP1504901_C14	-28.052	41.3051	gamma
HP1504901_A10	33.5109	16.0004	delta
HP1504901_I13	-20.2233	0.978129	endothelial
HP1504901_C23	-27.9793	41.2796	gamma
HP1504901_E2	-20.1771	0.217377	endothelial
HP1504901_D21	12.1153	57.2603	alpha
HP1504901_G19	13.9172	57.9936	alpha
HP1504901_L9	-27.867	43.3333	gamma
HP1504901_N23	-28.0529	44.5448	gamma
HP1504901_F3	8.87873	63.3884	alpha
HP1525301T2D_P14	-39.7924	1.4745	ductal
HP1525301T2D_K15	33.8158	-35.0133	alpha
HP1525301T2D_D19	36.8708	0.847484	delta
HP1526901T2D_K12	-55.3366	20.3224	gamma
HP1525301T2D_G11	38.5752	-32.5646	alpha
HP1525301T2D_A6	34.0877	-25.2595	alpha
HP1508501T2D_P4	-31.7031	24.7962	gamma
HP1525301T2D_K23	37.1017	-28.86	alpha
HP1525301T2D_O14	-39.7724	-6.21516	ductal
HP1525301T2D_H14	-41.571	-1.72348	ductal
HP1525301T2D_P1	-37.9194	-0.803496	ductal
HP1526901T2D_A20	-55.6125	23.0872	gamma
HP1526901T2D_A10	36.5688	2.46102	delta
HP1525301T2D_I21	37.468	-27.0221	alpha
HP1526901T2D_A3	32.7983	-38.6664	alpha
HP1526901T2D_O5	-47.2179	-5.72328	ductal
HP1525301T2D_I12	35.6577	-24.1278	alpha
HP1525301T2D_P22	37.4639	-24.4647	alpha
HP1525301T2D_H9	-39.7526	-36.0078	acinar
HP1526901T2D_P20	33.6196	-38.005	alpha
HP1525301T2D_K16	-41.2406	-4.89916	ductal
HP1526901T2D_B6	38.0388	1.92389	delta
HP1526901T2D_P9	5.01651	-61.9875	beta
HP1526901T2D_E11	6.33555	-59.9683	beta
HP1525301T2D_C3	-40.7902	-7.49894	ductal
HP1526901T2D_M21	33.1998	-35.2616	alpha
HP1526901T2D_H18	38.999	-0.103512	delta
HP1525301T2D_D1	-41.2146	-13.857	ductal
HP1526901T2D_D5	39.6657	-25.4295	alpha
HP1525301T2D_J14	35.6182	-27.5492	alpha
HP1525301T2D_P6	37.6172	-29.4882	alpha
HP1525301T2D_F15	3.99386	-62.8792	beta
HP1526901T2D_K6	35.7301	-36.4407	alpha
HP1525301T2D_C16	39.4323	-32.8627	alpha
HP1525301T2D_I18	-38.8168	1.47609	ductal
HP1525301T2D_M11	-41.712	-8.54031	ductal
HP1526901T2D_J6	4.85379	-58.3547	beta
HP1525301T2D_I23	-40.9372	-10.0701	ductal
HP1526901T2D_L16	32.9097	-33.3894	alpha
HP1526901T2D_F2	33.8332	-32.3246	alpha
HP1525301T2D_K14	-40.3222	-3.50619	ductal
HP1525301T2D_J7	-38.6358	-5.93428	ductal
HP1525301T2D_B1	39.6139	-29.608	alpha
HP1525301T2D_C4	-42.3118	1.48856	ductal
HP1525301T2D_J21	-41.7271	-9.54288	ductal
HP1525301T2D_E19	-56.9857	21.1087	gamma
HP1526901T2D_C13	-56.1287	20.1038	gamma
HP1525301T2D_B4	38.0617	-28.6053	alpha
HP1525301T2D_F19	40.7518	-33.0388	alpha
HP1525301T2D_B5	-56.9822	20.6284	gamma
HP1526901T2D_C19	-56.173	23.614	gamma
HP1526901T2D_E18	38.8174	-38.1201	alpha
HP1525301T2D_N3	3.05505	-62.7244	beta
HP1525301T2D_I6	4.16781	-63.641	beta
HP1525301T2D_N23	31.9923	-27.0591	alpha
HP1526901T2D_H23	-55.8317	23.833	gamma
HP1525301T2D_G22	39.5575	-28.1394	alpha
HP1525301T2D_J5	-40.8656	-35.093	acinar
HP1525301T2D_D10	-40.6401	-34.8239	acinar
HP1526901T2D_F15	-43.6856	-15.8529	ductal
HP1526901T2D_O22	33.9395	-29.2142	alpha
HP1526901T2D_M8	-44.9291	-3.83897	ductal
HP1525301T2D_C6	-39.3341	-5.21271	ductal
HP1526901T2D_G21	3.86056	-58.4266	beta
HP1525301T2D_D11	35.268	-27.3434	alpha
HP1526901T2D_I6	32.5781	-34.6713	alpha
HP1526901T2D_H24	7.40691	-60.8569	beta
HP1525301T2D_E1	40.6557	-28.373	alpha
HP1526901T2D_J22	37.8506	0.0698031	delta
HP1526901T2D_N15	34.8551	-30.0205	alpha
HP1525301T2D_G3	-42.0244	-10.4253	ductal
HP1525301T2D_E11	-41.9513	-15.5768	ductal
HP1525301T2D_C2	38.7747	-24.7886	alpha
HP1526901T2D_A1	6.14387	-56.2574	beta
HP1526901T2D_F3	36.6616	-33.4046	alpha
HP1526901T2D_P21	33.1675	-29.8506	alpha
HP1525301T2D_B11	37.0819	-25.1466	alpha
HP1526901T2D_J24	35.6792	-28.8938	alpha
HP1526901T2D_M15	7.28139	-61.3738	beta
HP1526901T2D_K11	-56.4739	20.07	gamma
HP1526901T2D_G17	5.82999	-58.2313	beta
HP1526901T2D_L1	5.4074	-56.6426	beta
HP1526901T2D_L2	37.7522	-39.1562	alpha
HP1526901T2D_M19	37.1935	2.01445	delta
HP1526901T2D_A16	38.4636	1.32661	delta
HP1525301T2D_N4	-41.2231	-15.468	ductal
HP1526901T2D_B4	5.22981	-60.9522	beta
HP1526901T2D_F21	33.0005	-39.5212	alpha
HP1525301T2D_M16	40.1379	-32.1266	alpha
HP1526901T2D_K3	6.7966	-57.9881	beta
HP1525301T2D_B24	-37.8364	-6.41903	ductal
HP1526901T2D_O15	8.22069	-58.4338	beta
HP1526901T2D_O12	21.9255	16.7287	mast
HP1526901T2D_J21	7.24955	-57.6467	beta
HP1525301T2D_O1	-42.1991	-34.3647	acinar
HP1525301T2D_O20	-42.1622	-10.6713	ductal
HP1526901T2D_G7	36.696	-37.9111	alpha
HP1526901T2D_J5	5.00739	-59.6955	beta
HP1525301T2D_G13	-38.154	-2.18413	ductal
HP1525301T2D_F23	3.58031	-63.7217	beta
HP1526901T2D_I1	-44.1278	-0.4955	ductal
HP1526901T2D_L4	4.61924	-60.2837	beta
HP1526901T2D_L14	-55.727	24.036	gamma
HP1525301T2D_L23	-42.2113	-9.02288	ductal
HP1525301T2D_H23	35.6036	-24.5945	alpha
HP1525301T2D_I1	-40.742	-7.03465	ductal
HP1526901T2D_F10	35.9244	-36.0707	alpha
HP1526901T2D_J18	-43.0691	0.239452	ductal
HP1526901T2D_I10	38.0885	2.32355	delta
HP1525301T2D_I4	37.6577	-27.7832	alpha
HP1526901T2D_B24	-46.034	-5.28833	ductal
HP1525301T2D_C24	-42.2571	-4.51291	ductal
HP1525301T2D_P8	37.4241	-24.7113	alpha
HP1526901T2D_G24	-44.9647	-1.09951	ductal
HP1526901T2D_J8	31.4038	-36.6679	alpha
HP1525301T2D_M22	-26.4641	-24.4908	ductal
HP1525301T2D_C1	37.3486	-24.3514	alpha
HP1526901T2D_G23	37.0463	0.626533	delta
HP1526901T2D_P22	37.2672	-0.171411	delta
HP1525301T2D_J2	37.2425	-27.7334	alpha
HP1526901T2D_H20	8.82809	-59.6438	beta
HP1525301T2D_G14	-40.5418	0.50038	ductal
HP1526901T2D_L7	-55.4959	23.561	gamma
HP1526901T2D_N12	4.38794	-60.6836	beta
HP1525301T2D_N7	29.7444	-19.8531	alpha
HP1525301T2D_L1	-39.857	-0.390357	ductal
HP1526901T2D_F5	6.11089	-60.9497	beta
HP1525301T2D_I10	-41.2387	-6.0146	ductal
HP1525301T2D_G20	-38.678	-2.52789	ductal
HP1526901T2D_K24	36.5711	-0.0981798	delta
HP1525301T2D_M7	2.53507	-62.4853	beta
HP1526901T2D_E8	33.7435	-32.3997	alpha
HP1526901T2D_P14	34.7127	-31.7634	alpha
HP1526901T2D_N4	-40.9297	-36.8438	acinar
HP1526901T2D_O24	6.61994	-58.4361	beta
HP1526901T2D_O14	6.95556	-59.53	beta
HP1525301T2D_H24	-38.3889	-0.0616011	ductal
HP1525301T2D_P13	-38.139	-4.80362	ductal
HP1526901T2D_E20	36.1031	0.727048	delta
HP1525301T2D_H6	37.2363	-29.127	alpha
HP1525301T2D_C10	35.6996	-25.1421	alpha
HP1526901T2D_C3	5.8468	-58.3086	beta
HP1526901T2D_N13	7.53719	-59.4778	beta
HP1526901T2D_L19	34.4781	-39.1664	alpha
HP1525301T2D_H7	36.4335	-23.9379	alpha
HP1525301T2D_G15	38.559	-25.1098	alpha
HP1526901T2D_E23	-45.4866	-6.66342	ductal
HP1525301T2D_D2	-36.6112	-5.86097	ductal
HP1526901T2D_D19	5.06158	-57.2839	beta
HP1525301T2D_I3	-42.7283	-11.6113	ductal
HP1525301T2D_E23	36.0853	-23.2624	alpha
HP1526901T2D_N9	35.5066	-39.7173	alpha
HP1525301T2D_I7	39.3291	-32.8832	alpha
HP1526901T2D_B18	36.4566	0.994267	delta
HP1526901T2D_O21	34.172	-29.5847	alpha
HP1526901T2D_G14	38.7403	-38.7224	alpha
HP1525301T2D_E7	37.7547	-30.5136	alpha
HP1525301T2D_F10	-39.8381	-32.6256	acinar
HP1525301T2D_K21	-37.8191	-3.51401	ductal
HP1525301T2D_E3	-56.9453	20.5864	gamma
HP1526901T2D_A4	38.2177	1.62542	delta
HP1525301T2D_H3	-42.8546	-7.75689	ductal
HP1526901T2D_D4	-44.6783	-0.673384	ductal
HP1526901T2D_G1	-58.1747	21.8989	gamma
HP1525301T2D_N5	-36.1144	0.0252789	ductal
HP1525301T2D_A17	-43.2561	-14.6647	ductal
HP1526901T2D_L5	11.0398	-60.4571	beta
HP1525301T2D_O18	41.1817	-27.958	alpha
HP1525301T2D_C13	-41.4239	-13.3023	ductal
HP1526901T2D_K22	39.4381	1.06544	delta
HP1526901T2D_F17	5.34959	-59.5143	beta
HP1526901T2D_N3	5.10705	-60.7836	beta
HP1526901T2D_K23	2.99137	-60.128	beta
HP1525301T2D_O2	35.9967	3.43899	delta
HP1526901T2D_K4	-45.2435	-0.921376	ductal
HP1525301T2D_I19	-41.7964	-8.02791	ductal
HP1526901T2D_P17	5.55988	-62.515	beta
HP1526901T2D_O1	8.17908	-57.8646	beta
HP1525301T2D_F2	38.8479	-23.9762	alpha
HP1526901T2D_M20	-45.1434	-6.12444	ductal
HP1526901T2D_O17	5.88126	-60.0283	beta
HP1525301T2D_H19	39.002	-32.0069	alpha
HP1526901T2D_M4	37.4718	-37.8344	alpha
HP1526901T2D_D22	-44.0646	-1.66134	ductal
HP1525301T2D_J15	-39.9629	-5.4221	ductal
HP1526901T2D_J11	-43.3411	-15.1871	ductal
HP1525301T2D_P21	-42.7572	-10.2679	ductal
HP1525301T2D_M13	38.2415	-31.9483	alpha
HP1526901T2D_A9	38.2559	-37.3164	alpha
HP1525301T2D_P24	36.8999	-24.2487	alpha
HP1525301T2D_I5	40.681	-30.8733	alpha
HP1525301T2D_L15	36.9463	-25.2885	alpha
HP1525301T2D_J23	-40.0163	-36.3778	acinar
HP1525301T2D_P5	-37.2691	0.394695	ductal
HP1525301T2D_F21	-36.6712	-1.68135	ductal
HP1525301T2D_A19	-38.6016	-1.93836	ductal
HP1526901T2D_P2	33.9332	-38.9747	alpha
HP1526901T2D_A12	29.7662	-19.8916	alpha
HP1526901T2D_K20	3.04981	-60.1719	beta
HP1525301T2D_J16	-39.6538	-36.5198	acinar
HP1526901T2D_E9	-45.7008	-5.49229	ductal
HP1526901T2D_F24	-45.6042	-6.17968	ductal
HP1525301T2D_O7	-41.987	-15.4597	ductal
HP1526901T2D_A2	6.44353	-56.3097	beta
HP1525301T2D_A12	-44.1047	-8.17731	ductal
HP1526901T2D_L11	32.2143	-33.1125	alpha
HP1526901T2D_B12	35.518	-35.4793	alpha
HP1526901T2D_H22	7.11428	-57.5475	beta
HP1526901T2D_J3	-42.6846	-16.1945	ductal
HP1525301T2D_K11	-40.9795	-8.34201	ductal
HP1526901T2D_A17	33.8697	-35.5246	alpha
HP1526901T2D_N7	-39.0385	-34.9996	acinar
HP1526901T2D_P12	33.6012	-29.6539	alpha
HP1526901T2D_J2	30.051	-20.173	alpha
HP1525301T2D_O23	-42.9222	-14.1149	ductal
HP1526901T2D_D18	39.2538	-24.8477	alpha
HP1526901T2D_B17	32.7117	-36.2452	alpha
HP1526901T2D_G2	36.1284	0.290415	delta
HP1525301T2D_A9	33.8027	-27.0654	alpha
HP1526901T2D_A11	-44.983	-1.53704	ductal
HP1526901T2D_I20	8.3078	-59.525	beta
HP1526901T2D_F1	31.9731	-29.0257	alpha
HP1525301T2D_F5	-40.4628	-31.7834	acinar
HP1525301T2D_A15	-43.2058	-5.54774	ductal
HP1526901T2D_F16	-46.0799	-4.41797	ductal
HP1526901T2D_B20	32.6355	-38.4355	alpha
HP1525301T2D_L2	-36.9873	-4.24869	ductal
HP1526901T2D_H12	36.7444	-35.0935	alpha
HP1525301T2D_B10	-42.7294	-10.2982	ductal
HP1526901T2D_G13	36.5123	-38.1281	alpha
HP1526901T2D_N18	-56.8509	22.754	gamma
HP1525301T2D_E2	-39.835	-36.9206	acinar
HP1525301T2D_P17	35.1358	-26.7939	alpha
HP1526901T2D_O9	36.3066	1.45753	delta
HP1526901T2D_N6	38.7927	-37.1296	alpha
HP1525301T2D_B15	29.9112	-20.0219	alpha
HP1525301T2D_L22	40.531	-31.6399	alpha
HP1526901T2D_I21	34.2539	-36.4761	alpha
HP1526901T2D_H16	-55.809	21.9249	gamma
HP1525301T2D_I2	40.0228	-32.6886	alpha
HP1525301T2D_H12	38.5067	-27.4284	alpha
HP1525301T2D_K18	-39.9387	-6.55717	ductal
HP1526901T2D_K21	-55.3062	21.6419	gamma
HP1525301T2D_L24	35.2608	-25.6045	alpha
HP1525301T2D_C17	-39.0869	-8.13319	ductal
HP1525301T2D_D3	-43.5426	-7.16097	ductal
HP1525301T2D_D22	-41.8679	-7.13031	ductal
HP1525301T2D_F16	-41.4315	-15.239	ductal
HP1526901T2D_P23	-55.6718	21.3817	gamma
HP1525301T2D_L14	10.8263	-60.5067	beta
HP1525301T2D_N8	38.524	-22.1864	alpha
HP1526901T2D_N20	-56.6869	22.4353	gamma
HP1526901T2D_D7	-39.649	-35.3399	acinar
HP1526901T2D_F9	37.8881	-35.449	alpha
HP1526901T2D_B9	5.15764	-60.5229	beta
HP1526901T2D_L24	37.83	1.7865	delta
HP1526901T2D_H4	5.7907	-58.0482	beta
HP1526901T2D_H17	37.649	-37.7573	alpha
HP1525301T2D_N11	-42.3998	-10.5554	ductal
HP1526901T2D_I24	-55.9194	20.5946	gamma
HP1526901T2D_A24	-44.8984	-5.6172	ductal
HP1525301T2D_G23	-56.8543	24.0349	gamma
HP1526901T2D_E22	-43.2262	0.0180728	ductal
HP1526901T2D_A22	37.9838	-0.838287	delta
HP1525301T2D_C14	-39.9744	-36.9185	acinar
HP1526901T2D_C14	-43.8538	-2.54345	ductal
HP1525301T2D_K6	-42.7738	-10.7809	ductal
HP1525301T2D_L4	-40.3503	0.35384	ductal
HP1525301T2D_G9	-38.8681	1.39111	ductal
HP1526901T2D_O23	35.1085	-39.6423	alpha
HP1525301T2D_M8	40.3291	-32.5269	alpha
HP1525301T2D_J18	-57.6486	22.3196	gamma
HP1526901T2D_A15	-55.1927	20.5564	gamma
HP1525301T2D_L20	-41.281	0.272099	ductal
HP1525301T2D_F4	38.9127	-24.3046	alpha
HP1526901T2D_E1	-44.2275	-1.10071	ductal
HP1526901T2D_P7	5.68361	-61.4983	beta
HP1526901T2D_K17	-40.5863	-35.5909	acinar
HP1526901T2D_F22	-43.0695	-16.0424	ductal
HP1526901T2D_D10	-55.3614	22.0563	gamma
HP1526901T2D_J20	37.2227	1.43149	delta
HP1525301T2D_I22	-42.2583	-8.0802	ductal
HP1525301T2D_J4	39.548	-34.5783	alpha
HP1525301T2D_F8	-41.4178	1.8153	ductal
HP1525301T2D_A13	-41.8722	-11.0517	ductal
HP1525301T2D_G4	37.9026	-27.1338	alpha
HP1525301T2D_J13	37.49	-26.6803	alpha
HP1525301T2D_G19	38.3408	-34.0219	alpha
HP1526901T2D_L17	35.6105	-32.0358	alpha
HP1525301T2D_A1	-36.1344	-0.0216911	ductal
HP1526901T2D_O13	6.0192	-62.8823	beta
HP1526901T2D_A7	38.2068	-24.7106	alpha
HP1525301T2D_N13	36.199	-26.857	alpha
HP1526901T2D_D3	-45.3614	-9.13454	ductal
HP1526901T2D_K18	35.7067	-37.3602	alpha
HP1525301T2D_D6	-39.7214	-31.7679	acinar
HP1525301T2D_O3	-39.9118	-36.267	acinar
HP1525301T2D_N14	-40.0747	0.689029	ductal
HP1526901T2D_J1	38.443	0.759014	delta
HP1525301T2D_J8	36.5329	-25.4722	alpha
HP1525301T2D_J9	-39.6293	-1.80043	ductal
HP1525301T2D_P2	-42.1491	-12.6007	ductal
HP1525301T2D_K12	-43.5096	-10.9589	ductal
HP1526901T2D_H9	-44.5253	-1.57799	ductal
HP1526901T2D_D24	28.1104	12.5349	delta
HP1526901T2D_N23	6.51501	-62.1914	beta
HP1526901T2D_B1	6.4222	-61.1614	beta
HP1526901T2D_K10	38.8194	-25.7714	alpha
HP1526901T2D_M14	-2.17129	21.5211	ductal
HP1526901T2D_N1	7.14494	-63.0298	beta
HP1526901T2D_I7	35.4144	-37.6165	alpha
HP1526901T2D_A19	7.79139	-57.729	beta
HP1525301T2D_N18	4.16486	-63.8248	beta
HP1525301T2D_O17	-39.9017	-9.00692	ductal
HP1526901T2D_C15	37.9143	0.810523	delta
HP1526901T2D_B23	-42.8816	-15.7424	ductal
HP1526901T2D_I19	39.1417	0.933216	delta
HP1526901T2D_J19	36.9077	-36.0168	alpha
HP1525301T2D_G17	-39.7607	-35.365	acinar
HP1525301T2D_C5	35.1952	-27.6673	alpha
HP1526901T2D_C22	-44.8395	-7.40428	ductal
HP1526901T2D_D2	-43.5863	-15.3377	ductal
HP1526901T2D_O3	-55.971	20.9119	gamma
HP1526901T2D_L15	-39.4943	-33.9498	acinar
HP1525301T2D_C23	-39.2986	-36.5774	acinar
HP1526901T2D_G16	34.9008	-36.4075	alpha
HP1526901T2D_D8	34.251	-37.8347	alpha
HP1526901T2D_I14	34.6686	-34.6912	alpha
HP1525301T2D_I15	-36.7001	-0.459264	ductal
HP1526901T2D_E4	-56.0697	20.735	gamma
HP1525301T2D_E13	38.4048	-28.0388	alpha
HP1526901T2D_M1	35.6312	-29.7657	alpha
HP1525301T2D_D23	4.43059	-62.9504	beta
HP1525301T2D_B8	-57.3803	20.9207	gamma
HP1526901T2D_A6	-41.939	-35.1339	acinar
HP1525301T2D_H10	10.8877	-60.5021	beta
HP1526901T2D_J4	32.5924	-36.579	alpha
HP1525301T2D_E15	-43.2036	-9.14749	ductal
HP1525301T2D_L9	34.1101	-26.5773	alpha
HP1526901T2D_G10	33.6711	-33.2229	alpha
HP1525301T2D_A11	37.0331	-26.0489	alpha
HP1526901T2D_K2	36.678	-37.2276	alpha
HP1526901T2D_B7	38.4302	-0.197931	delta
HP1526901T2D_I13	4.71477	-59.6525	beta
HP1526901T2D_O7	37.9855	0.48181	delta
HP1526901T2D_I3	3.4501	-60.8202	beta
HP1526901T2D_M2	6.4988	-62.0506	beta
HP1526901T2D_N10	39.561	-25.5508	alpha
HP1526901T2D_K1	-45.4555	-1.47269	ductal
HP1526901T2D_I8	34.0161	-39.6376	alpha
HP1526901T2D_C23	-45.5097	-4.62234	ductal
HP1525301T2D_P11	35.182	-23.2795	alpha
HP1526901T2D_L13	34.0726	-39.1188	alpha
HP1525301T2D_H11	-41.671	-9.25664	ductal
HP1525301T2D_P18	39.5261	-29.212	alpha
HP1526901T2D_E21	39.4177	0.482621	delta
HP1525301T2D_L6	-44.1747	-10.4423	ductal
HP1525301T2D_F12	-41.157	-0.34321	ductal
HP1525301T2D_P19	-43.2822	-5.79992	ductal
HP1526901T2D_C20	-45.5079	-8.47873	ductal
HP1525301T2D_A14	-41.448	-11.6543	ductal
HP1525301T2D_C9	-42.7103	-8.18168	ductal
HP1525301T2D_O6	30.0385	-20.2602	alpha
HP1525301T2D_L5	-39.2664	-35.8694	acinar
HP1526901T2D_E2	6.41717	-56.4817	beta
HP1525301T2D_C8	37.075	-25.8363	alpha
HP1526901T2D_B11	36.9049	-39.298	alpha
HP1525301T2D_A16	-56.2642	25.2482	gamma
HP1526901T2D_P11	6.32938	-58.3145	beta
HP1525301T2D_C7	-39.5891	-31.28	acinar
HP1526901T2D_O6	36.468	-34.7346	alpha
HP1525301T2D_J20	-43.172	-14.6109	ductal
HP1526901T2D_M13	-54.2461	19.8829	epsilon
HP1526901T2D_E3	36.2003	0.774473	delta
HP1526901T2D_G18	37.9792	-35.9595	alpha
HP1525301T2D_N16	-41.3391	1.04249	ductal
HP1525301T2D_C15	-38.7004	-7.19611	ductal
HP1525301T2D_B13	39.5635	-29.9827	alpha
HP1525301T2D_M5	-39.7331	-32.4381	acinar
HP1526901T2D_F12	-55.2042	23.0608	gamma
HP1525301T2D_D14	-42.6748	-9.83226	ductal
HP1526901T2D_J13	35.7467	-40.2928	alpha
HP1526901T2D_I12	-39.9567	-33.4361	acinar
HP1526901T2D_P10	5.23982	-59.7995	beta
HP1525301T2D_P15	-19.9679	-0.690399	endothelial
HP1525301T2D_N20	-42.1233	-14.282	ductal
HP1525301T2D_P20	-42.2835	-7.28093	ductal
HP1526901T2D_C16	36.7471	-33.5994	alpha
HP1525301T2D_L16	-40.7136	-4.80144	ductal
HP1526901T2D_J14	33.5961	-38.2396	alpha
HP1525301T2D_G5	-40.3583	-4.34329	ductal
HP1525301T2D_P4	-38.552	-7.59843	ductal
HP1525301T2D_I17	-38.528	-8.659	ductal
HP1526901T2D_C4	35.3253	-32.04	alpha
HP1526901T2D_H6	36.2166	-37.2488	alpha
HP1526901T2D_N21	-44.7432	-5.41529	ductal
HP1525301T2D_M6	-39.449	1.38357	ductal
HP1525301T2D_L17	4.31754	-63.8024	beta
HP1526901T2D_C17	5.05702	-57.5076	beta
HP1525301T2D_P9	37.8366	-23.9231	alpha
HP1526901T2D_F19	34.9796	-39.1719	alpha
HP1525301T2D_N10	-40.7211	-31.2524	acinar
HP1526901T2D_K19	-44.8986	-1.67943	ductal
HP1526901T2D_D9	32.7432	-30.1274	alpha
HP1525301T2D_D12	-57.229	23.89	gamma
HP1526901T2D_F8	-43.5149	-15.8887	ductal
HP1526901T2D_P19	33.3716	-37.1333	alpha
HP1525301T2D_N1	-37.8367	-5.9673	ductal
HP1525301T2D_B21	-43.6069	-5.18365	ductal
HP1525301T2D_H16	-38.663	-5.00927	ductal
HP1526901T2D_E14	-47.8549	-5.72376	ductal
HP1526901T2D_C11	6.00293	-58.6872	beta
HP1526901T2D_H21	-44.5257	-3.25543	ductal
HP1525301T2D_M15	-39.3708	-2.52865	ductal
HP1525301T2D_A5	38.6041	-28.3557	alpha
HP1526901T2D_L23	37.6285	-36.5105	alpha
HP1525301T2D_M10	39.5802	-27.9702	alpha
HP1526901T2D_N2	38.7716	-37.2193	alpha
HP1525301T2D_C19	-38.4658	1.26067	ductal
HP1526901T2D_O10	-55.3115	21.199	gamma
HP1526901T2D_H19	35.8451	-38.5146	alpha
HP1526901T2D_C6	36.6503	-34.1347	alpha
HP1526901T2D_E19	36.9722	1.58464	delta
HP1526901T2D_L21	37.6203	-36.5326	alpha
HP1525301T2D_K8	-39.8721	-31.8564	acinar
HP1526901T2D_I11	39.8949	1.25007	delta
HP1526901T2D_E10	-55.6818	19.9872	gamma
HP1525301T2D_H8	-42.4875	-34.2298	acinar
HP1526901T2D_L12	-54.7712	20.7667	gamma
HP1525301T2D_B7	38.2629	-33.1457	alpha
HP1525301T2D_K2	-37.8763	-2.12481	ductal
HP1526901T2D_H10	8.01752	-58.9556	beta
HP1525301T2D_M9	-42.8207	-13.7552	ductal
HP1526901T2D_D1	36.0406	-34.2557	alpha
HP1525301T2D_K7	-34.0754	-49.5736	acinar
HP1526901T2D_P1	32.3802	-36.192	alpha
HP1526901T2D_E6	36.7642	-33.8736	alpha
HP1525301T2D_K5	-40.4266	-35.5739	acinar
HP1526901T2D_M22	-55.1801	21.9026	gamma
HP1525301T2D_B14	-39.8606	-0.43324	ductal
HP1525301T2D_B18	32.3005	-26.7572	alpha
HP1526901T2D_J12	-43.8277	-1.68711	ductal
HP1525301T2D_D4	-39.3316	-3.66675	ductal
HP1526901T2D_M23	35.1635	-36.1257	alpha
HP1525301T2D_K19	40.1466	-35.3503	alpha
HP1525301T2D_G1	39.4212	-26.3001	alpha
HP1525301T2D_F3	-39.9557	-35.2163	acinar
HP1526901T2D_F20	32.1292	-31.9102	alpha
HP1526901T2D_N14	31.0178	-36.1584	alpha
HP1525301T2D_G10	-41.415	-9.94724	ductal
HP1525301T2D_M17	37.5804	0.387918	delta
HP1525301T2D_H2	-40.233	-3.949	ductal
HP1525301T2D_A7	36.3612	3.01858	delta
HP1526901T2D_A21	-43.117	-15.5567	ductal
HP1525301T2D_H1	-38.9777	-0.087685	ductal
HP1526901T2D_F23	39.1968	0.738735	delta
HP1525301T2D_J19	37.404	-27.4498	alpha
HP1526901T2D_G19	-56.0757	24.6485	gamma
HP1525301T2D_G18	34.6325	-25.5089	alpha
HP1526901T2D_G22	-45.6308	-7.02773	ductal
HP1525301T2D_H18	-40.5917	-1.55734	ductal
HP1526901T2D_C24	37.4614	2.19414	delta
HP1526901T2D_L6	6.71882	-58.4042	beta
HP1526901T2D_I4	32.1703	-34.9276	alpha
HP1525301T2D_O16	-41.868	-13.9338	ductal
HP1525301T2D_E16	39.2588	-31.3291	alpha
HP1526901T2D_B5	-43.6611	-5.85216	ductal
HP1526901T2D_O4	-45.7629	-4.09965	ductal
HP1526901T2D_P18	6.69954	-63.1534	beta
HP1525301T2D_I24	-39.2504	-5.35795	ductal
HP1525301T2D_O24	-37.4646	-2.1555	ductal
HP1526901T2D_D21	38.9871	0.347129	delta
HP1526901T2D_C10	4.55916	-61.2673	beta
HP1526901T2D_D14	-56.4734	19.5728	gamma
HP1526901T2D_C1	38.8501	0.827235	delta
HP1526901T2D_D12	-46.2937	-5.12769	ductal
HP1526901T2D_E5	-56.0917	23.4599	gamma
HP1525301T2D_M20	-42.9598	-13.7559	ductal
HP1526901T2D_G4	3.77406	-60.9418	beta
HP1526901T2D_P4	5.10975	-61.8916	beta
HP1526901T2D_B14	35.7509	-33.7856	alpha
HP1525301T2D_H17	-38.5352	-1.93059	ductal
HP1525301T2D_C21	-42.7248	-8.04013	ductal
HP1526901T2D_C2	38.6753	-37.4883	alpha
HP1525301T2D_L13	-40.6787	0.720115	ductal
[truncated: 70 more rows]
