# Supplementary material for: gCAnno: a graph-based single cell type annotation method
Source: BMC Genomics. 2020 Nov 23;21:823. doi: 10.1186/s12864-020-07223-4 (PMC7686723; doi:10.1186/s12864-020-07223-4)
Supplement: Supplementary file 12 — Additional file 12: Table S4. The statistic of select state of reported marker genes from the corresponding publications in four datasets with selected genes. [file 12864_2020_7223_MOESM12_ESM.xlsx]

## Sheet: Liver
Marker genes of Liver dataset
Cell type	Gene	State
Hepatocytes	CYP3A7	Not Select
Hepatocytes	CYP2A7	Not Select
Hepatocytes	CYP2A6	Not Select
Hepatocytes	SCD	Not Select
Hepatocytes	HMGCS1	Not Select
Hepatocytes	ACSS2	Not Select
Hepatocytes	TM7SF2	Not Select
Hepatocytes	SEC16B	Not Select
Hepatocytes	SLBP	Not Select
Hepatocytes	RND3	Not Select
Hepatocytes	PCK1	Not Select
Hepatocytes	BCHE	Not Select
Hepatocytes	G6PC	Not Select
Hepatocytes	GHR	Select
Hepatocytes	ALDH6A1	Not Select
Hepatocytes	RPP25L	Not Select
Hepatocytes	HSD11B1	Select
Hepatocytes	HAMP	Not Select
Hepatocytes	HPR	Select
Hepatocytes	GSTA2	Not Select
Hepatocytes	AKR1C1	Not Select
Hepatocytes	MASP2	Select
Portal_endothelial	RAMP3	Select
Portal_endothelial	INMT	Select
Portal_endothelial	DNASE1L3	Select
Portal_endothelial	LIFR	Not Select
AlfaBetaT	CD2	Select
AlfaBetaT	CD3D	Select
AlfaBetaT	TRAC	Select
AlfaBetaT	GZM	Not Select
NK_like	CD7	Select
NK_like	KLRB1	Select
NK_like	NKG7	Not Select
GamaDetaT	GNLY	Select
GamaDetaT	PTGDS	Not Select
GamaDetaT	GZMB	Select
GamaDetaT	TRDC	Not Select
GamaDetaT	STMN1	Not Select
GamaDetaT	HMGB2	Not Select
GamaDetaT	TYMS	Not Select
Erythroid_cells	HBB	Not Select
Erythroid_cells	CA1	Select
Erythroid_cells	ALAS2	Select
Mature_B_cells	MS4A1	Select
Mature_B_cells	LTB	Select
Mature_B_cells	CD37	Select
Mature_B_cells	CD79B	Select
Periportal_LSECs	MGP	Select
Periportal_LSECs	SPARCL1	Select
Periportal_LSECs	TM4SF1	Not Select
Periportal_LSECs	CLEC14A	Select
Inflammatory_Macs	S100A8	Select
Inflammatory_Macs	LYZ	Select
Inflammatory_Macs	S100A9	Select
Inflammatory_Macs	HLA-DPB1	Not Select
Central_venous_LSECs	CCL14	Select
Central_venous_LSECs	CLEC1B	Select
Central_venous_LSECs	FCN2	Select
Central_venous_LSECs	S100A13	Not Select
Non-inflammatory_Macs	CD5L	Select
Non-inflammatory_Macs	MARCO	Select
Non-inflammatory_Macs	VSIG4	Select
Plasma_cells	IGLC2	Not Select
Plasma_cells	IGHG1	Select
Plasma_cells	IGK	Not Select
Cholangiocytes	KRT7	Select
Cholangiocytes	KRT19	Select
Cholangiocytes	SOX9	Select
Cholangiocytes	EPCAM	Select
Hepatic_Stellate_Cells	ACTA2	Select
Hepatic_Stellate_Cells	COL1A1	Select
Hepatic_Stellate_Cells	RBP1	Not Select
Find rate		0.542

## Sheet: HCC, ICCA
Marker genes of HCC, ICCA dataset
Cell type	Gene	State
T_cell	CD2	Select
T_cell	CD3E	Select
T_cell	CD3D	Select
T_cell	CD3G	Not Select
CAF	COL1A2	Select
CAF	FAP	Not Select
CAF	PDPN.DCN	Not Select
CAF	COL3A1	Select
CAF	COL6A1	Select
HPC_like	EPCAM	Not Select
HPC_like	KRT19	Select
HPC_like	PROM1	Not Select
HPC_like	ALDH1A1	Not Select
HPC_like	CD24	Not Select
TEC	PECAM1	Select
TEC	VWF	Select
TEC	ENG	Select
TEC	CDH5	Not Select
B_cell	CD79A	Select
B_cell	SLAMF7	Not Select
B_cell	BLNK	Not Select
B_cell	FCRL5	Not Select
TAM	CD14	Select
TAM	CD163	Not Select
TAM	CD68	Not Select
TAM	CSF1R	Select
Find rate		0.5

## Sheet: Pancreas 
Marker genes of Pancreas dataset
Cell type	Gene	State
ductal	TPM1	Not Select
ductal	S100A14	Select
ductal	S100A16	Not Select
ductal	KRT7	Select
ductal	KRT18	Not Select
ductal	KRT17	Not Select
ductal	S100A11	Not Select
ductal	S100A10	Not Select
ductal	ANXA2	Not Select
ductal	TACSTD2	Select
ductal	KRT19	Not Select
beta	HADH	Select
beta	ADCYAP1	Select
beta	PDX1	Not Select
beta	DLK1	Select
beta	IGF2	Select
beta	IAPP	Not Select
alpha	TMEM176B	Not Select
alpha	PCSK2	Select
alpha	PDK4	Not Select
alpha	CLU	Not Select
alpha	MUC13	Select
alpha	CRYBA2	Select
alpha	KCTD12	Not Select
alpha	RGS4	Select
alpha	NPNT	Select
alpha	TM4SF4	Not Select
alpha	SLC7A2	Select
alpha	IRX2	Select
alpha	TTR	Not Select
acinar	CPB1	Select
acinar	CELA2A	Select
acinar	KLK1	Select
acinar	CTRC	Select
acinar	PNLIPRP1	Select
acinar	SYCN	Select
acinar	PNLIP	Select
acinar	REG1A	Not Select
acinar	CPA2	Select
acinar	PRSS1	Select
acinar	CPA1	Select
acinar	CLPS	Select
acinar	SPINK1	Not Select
acinar	PRSS2	Not Select
acinar	PLA2G1B	Select
acinar	CTRB2	Not Select
acinar	CELA3B	Select
acinar	CELA3A	Select
acinar	CTRB1	Not Select
delta	SEC11C	Select
delta	RGS2	Not Select
delta	RBP4	Select
delta	LEPR	Select
delta	SST	Not Select
gamma	DPYSL3	Select
gamma	AQP3	Select
gamma	MEIS2	Not Select
gamma	ARX	Not Select
gamma	STMN2	Select
gamma	PPY	Select
mast	TPSAB1	Select
mast	KIT	Select
mast	CPA3	Select
macrophage	CD163	Select
macrophage	CD68	Not Select
macrophage	IgG	Not Select
epsilon	GHRL	Select
Find rate		0.597

## Sheet: AT root 
Marker genes of AT root dataset
Cell type	Gene	State
endodermis_cs	AT5G38005	Select
endodermis_cs	AT5G57620	Select
endodermis_cs	AT1G44970	Select
endodermis_cs	AT4G17280	Select
endodermis_cs	AT5G41040	Select
endodermis_cs	AT1G61590	Select
endodermis_cs	AT2G47630	Select
endodermis_cs	AT2G18150	Select
endodermis_cs	AT5G42180	Select
endodermis_cs	AT5G07475	Not Select
endodermis_cs	AT4G17215	Select
endodermis_cs	AT4G13580	Select
endodermis_cs	AT3G55230	Select
endodermis_cs	AT3G55090	Select
endodermis_cs	AT3G52790	Not Select
endodermis_cs	AT3G24020	Select
endodermis_cs	AT2G48130	Select
endodermis_cs	AT4G11290	Select
endodermis_cs	AT2G40113	Select
endodermis_cs	AT2G39430	Select
endodermis_cs	AT2G38380	Select
endodermis_cs	AT2G30210	Select
endodermis_cs	AT2G27370	Select
endodermis_cs	AT1G71740	Select
endodermis_cs	AT3G54400	Not Select
endodermis_cs	AT4G22110	Not Select
endodermis_cs	AT1G05260	Select
endodermis_cs	AT1G16390	Not Select
columella_root_cap	AT1G71140	Select
columella_root_cap	AT1G74010	Select
columella_root_cap	AT2G21610	Select
columella_root_cap	AT3G18250	Select
columella_root_cap	AT3G61930	Select
columella_root_cap	AT2G43000	Select
columella_root_cap	AT5G20045	Select
columella_root_cap	AT4G27400	Select
columella_root_cap	AT4G01750	Not Select
columella_root_cap	AT3G60140	Select
endodermis	AT4G37770	Select
endodermis	AT5G08350	Not Select
endodermis	AT5G13880	Select
endodermis	AT5G24600	Not Select
endodermis	AT4G22710	Not Select
endodermis	AT4G25434	Select
endodermis	AT2G28500	Select
endodermis	AT1G35210	Not Select
endodermis	AT1G70130	Select
endodermis	AT3G28600	Select
root_hair	AT1G12040	Select
root_hair	AT1G12560	Select
root_hair	AT1G30870	Not Select
root_hair	AT1G34330	Not Select
root_hair	AT5G23030	Select
root_hair	AT1G62980	Not Select
root_hair	AT1G70460	Select
root_hair	AT1G73580	Not Select
root_hair	AT1G06923	Select
root_hair	AT1G34510	Not Select
root_hair	AT1G01780	Not Select
root_hair	AT5G57530	Not Select
root_hair	AT5G40860	Select
root_hair	AT5G43350	Select
root_hair	AT5G46870	Not Select
root_hair	AT5G49080	Not Select
root_hair	AT2G03720	Select
root_hair	AT5G57540	Select
root_hair	AT5G57625	Not Select
root_hair	AT5G58010	Select
root_hair	AT5G61650	Select
root_hair	AT1G01750	Not Select
root_hair	AT2G20520	Select
root_hair	AT5G35190	Not Select
root_hair	AT2G23620	Not Select
root_hair	AT4G22080	Select
root_hair	AT4G25220	Select
root_hair	AT4G25790	Select
root_hair	AT4G28850	Select
root_hair	AT4G29180	Select
root_hair	AT4G30320	Not Select
root_hair	AT4G19680	Select
root_hair	AT4G33730	Select
root_hair	AT4G37220	Select
root_hair	AT5G04960	Select
root_hair	AT5G06630	Select
root_hair	AT5G06640	Select
root_hair	AT5G19800	Select
root_hair	AT5G22410	Select
root_hair	AT4G34580	Select
root_hair	AT5G24313	Select
root_hair	AT4G13390	Not Select
root_hair	AT4G08400	Select
root_hair	AT2G24980	Not Select
root_hair	AT2G25240	Select
root_hair	AT2G32270	Select
root_hair	AT2G41970	Select
root_hair	AT2G44110	Select
root_hair	AT3G07070	Select
root_hair	AT5G26080	Select
root_hair	AT3G10710	Select
root_hair	AT3G23175	Select
root_hair	AT3G23190	Not Select
root_hair	AT3G46900	Select
root_hair	AT3G49960	Select
root_hair	AT3G60280	Select
root_hair	AT3G60330	Select
root_hair	AT3G17600	Not Select
root_hair	AT4G08410	Select
root_hair	AT4G22217	Not Select
root_hair	AT1G33090	Not Select
root_hair	AT5G11440	Not Select
root_hair	AT3G16390	Not Select
root_hair	AT2G35610	Not Select
root_hair	AT1G67330	Not Select
root_hair	AT5G40510	Not Select
root_hair	AT1G53680	Not Select
root_hair	AT1G27140	Not Select
root_hair	AT1G24735	Not Select
root_hair	AT1G23750	Not Select
phloem	AT5G62680	Select
phloem	AT5G22090	Select
phloem	AT5G02600	Select
phloem	AT4G25010	Select
phloem	AT4G20240	Select
phloem	AT4G14020	Select
phloem	AT4G00670	Select
phloem	AT1G76130	Select
phloem	AT1G54575	Select
phloem	AT1G24575	Select
phloem	AT1G12010	Select
phloem	AT1G11450	Select
phloem	AT1G59730	Select
phloem_and_pericycle	AT1G21440	Select
phloem_and_pericycle	AT2G18800	Not Select
phloem_and_pericycle	AT1G32450	Not Select
phloem_and_pericycle	AT1G74458	Select
phloem_and_pericycle	AT1G78370	Select
phloem_and_pericycle	AT3G23430	Select
phloem_and_pericycle	AT4G01450	Select
phloem_and_pericycle	AT4G30450	Not Select
phloem_and_pericycle	AT5G14200	Select
phloem_and_pericycle	AT1G26450	Select
phloem_and_pericycle	AT2G31083	Not Select
phloem_and_pericycle	AT3G45700	Not Select
phloem_and_pericycle	AT5G09735	Not Select
photosynthetic_cell	AT4G12800	Select
photosynthetic_cell	AT4G16410	Select
photosynthetic_cell	AT4G17245	Not Select
photosynthetic_cell	AT4G21280	Not Select
photosynthetic_cell	AT2G30950	Not Select
photosynthetic_cell	AT4G25050	Select
photosynthetic_cell	AT4G12470	Not Select
photosynthetic_cell	AT4G25080	Not Select
photosynthetic_cell	AT4G28750	Select
photosynthetic_cell	AT4G21870	Select
photosynthetic_cell	AT4G10340	Not Select
photosynthetic_cell	AT3G56940	Not Select
photosynthetic_cell	AT4G04640	Select
photosynthetic_cell	AT4G03280	Select
photosynthetic_cell	AT4G02770	Select
photosynthetic_cell	AT3G61470	Select
photosynthetic_cell	AT4G32260	Not Select
photosynthetic_cell	AT3G54890	Not Select
photosynthetic_cell	AT3G54210	Not Select
photosynthetic_cell	AT3G50820	Select
photosynthetic_cell	AT3G50480	Not Select
photosynthetic_cell	AT4G05180	Not Select
photosynthetic_cell	AT4G34190	Not Select
photosynthetic_cell	AT5G19940	Not Select
photosynthetic_cell	AT5G01530	Select
photosynthetic_cell	AT5G65220	Not Select
photosynthetic_cell	AT5G64040	Select
photosynthetic_cell	AT5G61410	Not Select
photosynthetic_cell	AT5G54770	Select
photosynthetic_cell	AT5G54600	Not Select
photosynthetic_cell	AT5G66052	Not Select
photosynthetic_cell	AT5G54270	Select
photosynthetic_cell	AT5G51110	Select
photosynthetic_cell	AT5G51010	Not Select
photosynthetic_cell	AT5G47560	Not Select
photosynthetic_cell	AT5G47110	Not Select
photosynthetic_cell	AT5G46110	Not Select
photosynthetic_cell	AT5G38430	Select
photosynthetic_cell	AT5G38420	Select
photosynthetic_cell	AT5G38410	Not Select
photosynthetic_cell	AT5G23120	Not Select
photosynthetic_cell	AT3G47650	Not Select
photosynthetic_cell	AT5G14320	Not Select
photosynthetic_cell	AT5G13630	Not Select
photosynthetic_cell	AT5G09660	Select
photosynthetic_cell	AT5G02120	Not Select
photosynthetic_cell	AT4G38970	Select
photosynthetic_cell	AT2G34420	Select
photosynthetic_cell	AT3G47470	Select
photosynthetic_cell	AT3G27850	Not Select
photosynthetic_cell	AT1G75350	Not Select
photosynthetic_cell	AT2G05070	Not Select
photosynthetic_cell	AT2G05100	Select
photosynthetic_cell	AT2G05520	Not Select
photosynthetic_cell	AT2G05620	Not Select
photosynthetic_cell	AT2G06520	Not Select
photosynthetic_cell	AT2G13360	Select
photosynthetic_cell	AT2G20260	Select
photosynthetic_cell	AT2G20890	Not Select
photosynthetic_cell	AT2G21330	Not Select
photosynthetic_cell	AT3G16140	Select
photosynthetic_cell	AT3G15850	Not Select
photosynthetic_cell	AT1G74970	Not Select
photosynthetic_cell	AT3G14420	Select
photosynthetic_cell	AT3G08940	Not Select
photosynthetic_cell	AT2G47400	Not Select
photosynthetic_cell	AT2G46820	Select
photosynthetic_cell	AT2G46220	Not Select
photosynthetic_cell	AT2G42220	Select
photosynthetic_cell	AT2G39730	Not Select
photosynthetic_cell	AT2G22990	Select
photosynthetic_cell	AT2G24090	Not Select
photosynthetic_cell	AT2G24270	Select
photosynthetic_cell	AT2G26500	Select
photosynthetic_cell	AT2G29340	Not Select
photosynthetic_cell	AT2G30570	Select
photosynthetic_cell	AT3G14415	Not Select
photosynthetic_cell	AT1G74470	Not Select
photosynthetic_cell	AT1G72610	Select
photosynthetic_cell	AT1G68010	Not Select
photosynthetic_cell	AT3G26650	Select
photosynthetic_cell	AT3G25920	Not Select
photosynthetic_cell	AT3G22120	Not Select
photosynthetic_cell	AT3G21055	Not Select
photosynthetic_cell	AT1G03600	Not Select
photosynthetic_cell	AT1G05190	Not Select
photosynthetic_cell	AT1G06680	Select
photosynthetic_cell	AT1G08380	Not Select
photosynthetic_cell	AT1G12900	Select
photosynthetic_cell	AT1G15820	Not Select
photosynthetic_cell	AT1G20340	Not Select
photosynthetic_cell	AT1G23310	Not Select
photosynthetic_cell	AT1G29910	Select
photosynthetic_cell	AT1G29920	Not Select
photosynthetic_cell	AT1G29930	Select
photosynthetic_cell	AT1G31330	Select
photosynthetic_cell	AT1G32060	Not Select
photosynthetic_cell	AT1G32470	Select
photosynthetic_cell	AT1G42970	Select
photosynthetic_cell	AT1G44575	Select
photosynthetic_cell	AT1G52230	Not Select
photosynthetic_cell	AT1G55450	Not Select
photosynthetic_cell	AT1G55670	Select
photosynthetic_cell	AT1G61520	Select
photosynthetic_cell	AT1G64510	Not Select
photosynthetic_cell	AT1G67090	Select
photosynthetic_cell	AT1G67740	Not Select
photosynthetic_cell	AT3G47070	Select
photosynthetic_cell	AT2G35370	Select
photosynthetic_cell	AT5G66570	Not Select
proto_and_meta_phloem	AT5G38070	Not Select
proto_and_meta_phloem	AT2G44000	Not Select
proto_and_meta_phloem	AT2G48075	Select
proto_and_meta_phloem	AT3G01670	Select
proto_and_meta_phloem	AT3G01680	Select
proto_and_meta_phloem	AT3G01940	Select
proto_and_meta_phloem	AT3G03200	Not Select
proto_and_meta_phloem	AT3G05620	Select
proto_and_meta_phloem	AT2G42820	Select
proto_and_meta_phloem	AT3G07420	Select
proto_and_meta_phloem	AT3G13590	Select
proto_and_meta_phloem	AT3G17380	Not Select
proto_and_meta_phloem	AT3G17730	Select
proto_and_meta_phloem	AT3G18260	Select
proto_and_meta_phloem	AT3G20450	Select
proto_and_meta_phloem	AT3G20570	Not Select
proto_and_meta_phloem	AT3G24110	Not Select
proto_and_meta_phloem	AT3G08510	Not Select
proto_and_meta_phloem	AT2G41300	Not Select
proto_and_meta_phloem	AT2G41200	Select
proto_and_meta_phloem	AT2G39830	Not Select
proto_and_meta_phloem	AT1G54217	Not Select
proto_and_meta_phloem	AT1G54400	Select
proto_and_meta_phloem	AT1G55760	Not Select
proto_and_meta_phloem	AT1G58007	Not Select
proto_and_meta_phloem	AT1G60360	Not Select
proto_and_meta_phloem	AT1G61760	Select
proto_and_meta_phloem	AT1G68230	Not Select
proto_and_meta_phloem	AT1G69325	Not Select
proto_and_meta_phloem	AT1G75700	Not Select
proto_and_meta_phloem	AT1G75720	Not Select
proto_and_meta_phloem	AT1G77700	Select
proto_and_meta_phloem	AT2G14620	Select
proto_and_meta_phloem	AT2G20362	Select
proto_and_meta_phloem	AT2G27035	Select
proto_and_meta_phloem	AT2G34530	Select
proto_and_meta_phloem	AT2G34540	Select
proto_and_meta_phloem	AT2G37925	Select
proto_and_meta_phloem	AT3G25855	Select
proto_and_meta_phloem	AT3G47180	Select
proto_and_meta_phloem	AT3G49360	Select
proto_and_meta_phloem	AT3G58350	Select
proto_and_meta_phloem	AT5G22870	Select
proto_and_meta_phloem	AT5G27680	Not Select
proto_and_meta_phloem	AT5G37180	Select
proto_and_meta_phloem	AT5G37680	Not Select
proto_and_meta_phloem	AT5G38770	Select
proto_and_meta_phloem	AT5G39471	Select
proto_and_meta_phloem	AT5G41470	Select
proto_and_meta_phloem	AT5G42720	Select
proto_and_meta_phloem	AT5G45320	Select
proto_and_meta_phloem	AT5G48060	Select
proto_and_meta_phloem	AT5G48690	Select
proto_and_meta_phloem	AT5G49320	Not Select
proto_and_meta_phloem	AT5G52270	Not Select
proto_and_meta_phloem	AT5G56720	Select
proto_and_meta_phloem	AT5G61390	Not Select
proto_and_meta_phloem	AT5G67460	Select
proto_and_meta_phloem	AT5G67550	Select
proto_and_meta_phloem	AT5G20970	Select
proto_and_meta_phloem	AT1G47271	Select
proto_and_meta_phloem	AT5G17260	Select
proto_and_meta_phloem	AT5G14110	Select
proto_and_meta_phloem	AT3G58720	Select
proto_and_meta_phloem	AT3G63000	Not Select
proto_and_meta_phloem	AT4G00890	Select
proto_and_meta_phloem	AT4G09950	Select
proto_and_meta_phloem	AT4G16015	Select
proto_and_meta_phloem	AT4G16400	Not Select
proto_and_meta_phloem	AT4G21310	Select
proto_and_meta_phloem	AT4G24250	Select
proto_and_meta_phloem	AT4G32270	Select
proto_and_meta_phloem	AT4G33490	Select
proto_and_meta_phloem	AT4G35970	Select
proto_and_meta_phloem	AT4G37445	Select
proto_and_meta_phloem	AT5G04680	Select
proto_and_meta_phloem	AT5G04890	Not Select
proto_and_meta_phloem	AT5G07710	Not Select
proto_and_meta_phloem	AT5G08391	Not Select
proto_and_meta_phloem	AT5G11990	Select
proto_and_meta_phloem	AT5G14510	Not Select
proto_and_meta_phloem	AT1G31880	Not Select
proto_and_meta_phloem	AT1G73370	Not Select
proto_and_meta_phloem	AT1G29520	Not Select
proto_and_meta_phloem	AT1G02950	Not Select
proto_and_meta_phloem	AT1G05760	Not Select
proto_and_meta_phloem	AT1G05770	Select
proto_and_meta_phloem	AT1G06490	Select
proto_and_meta_phloem	AT1G08160	Select
proto_and_meta_phloem	AT1G31720	Not Select
proto_and_meta_phloem	AT1G11570	Select
proto_and_meta_phloem	AT1G13920	Select
proto_and_meta_phloem	AT1G14730	Select
proto_and_meta_phloem	AT1G16022	Select
proto_and_meta_phloem	AT1G29380	Select
proto_and_meta_phloem	AT1G11500	Select
stem_cell_niche	AT3G55970	Not Select
stem_cell_niche	AT4G00490	Not Select
stem_cell_niche	AT1G56680	Select
stem_cell_niche	AT3G53040	Not Select
stem_cell_niche	AT4G34970	Not Select
stem_cell_niche	AT4G15248	Not Select
stem_cell_niche	AT5G59870	Not Select
stem_cell_niche	AT5G48480	Not Select
stem_cell_niche	AT3G46320	Not Select
stem_cell_niche	AT1G04610	Select
stem_cell_niche	AT1G09570	Not Select
stem_cell_niche	AT1G13620	Not Select
stem_cell_niche	AT1G26680	Not Select
stem_cell_niche	AT1G53708	Not Select
stem_cell_niche	AT1G78520	Not Select
stem_cell_niche	AT4G35720	Not Select
stem_cell_niche	AT2G04025	Select
stem_cell_niche	AT3G51750	Select
stem_cell_niche	AT1G07790	Select
stem_cell_niche	AT1G54690	Select
stem_cell_niche	AT2G03090	Not Select
stem_cell_niche	AT2G28790	Select
stem_cell_niche	AT3G45930	Select
stem_cell_niche	AT2G39700	Select
stem_cell_niche	AT4G38410	Not Select
stem_cell_niche	AT5G07550	Not Select
stem_cell_niche	AT5G17520	Not Select
stem_cell_niche	AT5G39820	Not Select
unknownType	AT2G21140	Not Select
unknownType	AT4G12550	Not Select
unknownType	AT4G15390	Select
unknownType	AT3G26450	Select
lateral_root_cap	AT5G58784	Select
lateral_root_cap	AT4G37160	Select
lateral_root_cap	AT3G20940	Not Select
lateral_root_cap	AT2G23630	Select
lateral_root_cap	AT5G42600	Select
epidermis	AT5G01870	Select
epidermis	AT4G36250	Select
epidermis	AT4G29020	Select
epidermis	AT4G21620	Select
epidermis	AT4G16240	Select
epidermis	AT4G16230	Select
epidermis	AT3G23450	Select
epidermis	AT3G17050	Not Select
epidermis	AT3G16370	Select
epidermis	AT3G08770	Select
epidermis	AT2G42840	Select
epidermis	AT2G38530	Select
epidermis	AT2G32690	Select
epidermis	AT2G26250	Select
epidermis	AT1G55260	Select
epidermis	AT1G05135	Not Select
epidermis	AT5G25610	Select
epidermis	AT5G59320	Select
mature_cortex	AT1G12090	Select
mature_cortex	AT1G12845	Select
mature_cortex	AT1G17300	Select
mature_cortex	AT1G20190	Select
mature_cortex	AT1G29025	Select
mature_cortex	AT4G22460	Select
mature_cortex	AT5G08640	Select
mature_cortex	AT5G11420	Select
mature_cortex	AT1G62510	Select
proximal_meristem	AT3G14190	Select
proximal_meristem	AT3G25980	Select
proximal_meristem	AT3G51280	Select
proximal_meristem	AT3G51720	Select
proximal_meristem	AT3G52110	Select
proximal_meristem	AT4G02150	Select
proximal_meristem	AT4G02800	Select
proximal_meristem	AT4G05190	Select
proximal_meristem	AT4G15830	Select
proximal_meristem	AT4G32830	Select
proximal_meristem	AT4G31840	Select
proximal_meristem	AT4G33270	Select
proximal_meristem	AT5G06150	Select
proximal_meristem	AT5G13840	Select
proximal_meristem	AT3G12870	Select
proximal_meristem	AT5G17160	Select
proximal_meristem	AT5G25090	Select
proximal_meristem	AT5G44560	Select
proximal_meristem	AT5G56120	Select
proximal_meristem	AT4G23800	Select
proximal_meristem	AT5G16250	Select
proximal_meristem	AT5G66230	Select
proximal_meristem	AT1G08560	Select
proximal_meristem	AT5G62550	Select
proximal_meristem	AT3G02640	Select
proximal_meristem	AT3G02120	Select
proximal_meristem	AT2G26760	Select
proximal_meristem	AT2G25880	Select
proximal_meristem	AT2G25060	Select
proximal_meristem	AT1G76540	Select
proximal_meristem	AT1G50490	Select
proximal_meristem	AT1G14350	Select
proximal_meristem	AT1G02730	Select
xylem	AT4G12910	Not Select
xylem	AT4G18780	Select
xylem	AT4G26580	Select
xylem	AT5G48920	Select
xylem	AT3G62160	Select
xylem	AT5G67230	Select
xylem	AT5G60490	Select
xylem	AT5G60020	Select
xylem	AT5G54690	Select
xylem	AT3G62020	Not Select
xylem	AT3G56730	Select
xylem	AT4G08160	Select
xylem	AT5G45970	Select
xylem	AT5G40020	Not Select
xylem	AT3G55990	Select
xylem	AT5G19870	Select
xylem	AT5G17420	Select
xylem	AT5G16490	Select
xylem	AT5G15630	Select
xylem	AT5G12870	Not Select
xylem	AT5G12300	Select
xylem	AT5G06610	Not Select
xylem	AT5G03260	Select
xylem	AT5G03170	Not Select
xylem	AT5G01930	Select
xylem	AT5G01360	Not Select
xylem	AT4G28500	Not Select
xylem	AT4G27435	Not Select
xylem	AT5G44030	Select
xylem	AT3G53350	Select
xylem	AT1G27440	Not Select
xylem	AT3G51325	Select
xylem	AT1G68585	Not Select
xylem	AT1G66690	Select
xylem	AT1G63120	Not Select
xylem	AT1G58370	Not Select
xylem	AT1G58070	Select
xylem	AT1G56720	Select
xylem	AT1G54790	Select
xylem	AT1G47410	Select
xylem	AT1G68725	Select
xylem	AT1G43790	Select
xylem	AT1G08283	Not Select
xylem	AT1G09440	Select
xylem	AT1G12260	Select
xylem	AT1G13635	Select
xylem	AT1G17090	Not Select
xylem	AT1G19300	Not Select
xylem	AT1G23460	Select
xylem	AT1G24030	Select
xylem	AT1G02335	Not Select
xylem	AT3G52900	Select
xylem	AT1G70500	Select
xylem	AT2G17710	Not Select
xylem	AT3G50220	Select
xylem	AT3G42950	Not Select
xylem	AT3G27200	Not Select
xylem	AT3G24535	Select
xylem	AT3G22415	Select
xylem	AT3G21550	Select
xylem	AT3G18660	Select
xylem	AT1G29890	Not Select
xylem	AT1G76020	Not Select
xylem	AT5G60720	Select
xylem	AT2G46760	Select
xylem	AT2G40320	Select
xylem	AT2G38320	Select
xylem	AT2G38080	Select
xylem	AT2G37090	Select
xylem	AT2G34410	Select
xylem	AT2G28315	Select
xylem	AT2G27740	Not Select
xylem	AT3G16920	Not Select
xylem	AT5G67210	Not Select
RC3	AT1G06080	Select
RC3	AT5G51520	Select
RC3	AT4G13890	Select
RC3	AT3G56060	Select
RC3	AT3G22740	Select
RC3	AT3G20160	Select
RC3	AT3G06460	Select
RC3	AT2G43880	Select
RC3	AT2G32620	Select
RC3	AT2G32610	Select
RC3	AT2G23410	Select
RC3	AT1G08310	Select
RC3	AT1G72790	Select
RC3	AT1G11190	Select
RC3	AT1G47590	Not Select
RC3	AT1G51260	Select
RC3	AT1G55240	Select
RC3	AT2G14095	Select
RC3	AT2G23400	Select
lateral_root	AT5G57770	Select
lateral_root	AT1G60390	Select
lateral_root	AT2G36410	Select
lateral_root	AT2G46890	Select
lateral_root	AT3G48185	Select
lateral_root	AT3G48970	Select
lateral_root	AT1G04240	Select
lateral_root	AT1G79760	Select
lateral_root	AT4G14650	Select
lateral_root	AT1G77690	Select
lateral_root	AT1G69080	Select
Find rate		0.652
