# Supplementary material for: gCAnno: a graph-based single cell type annotation method
Source: BMC Genomics. 2020 Nov 23;21:823. doi: 10.1186/s12864-020-07223-4 (PMC7686723; doi:10.1186/s12864-020-07223-4)
Supplement: Supplementary file 13 — Additional file 13: Table S5. The statistic of kappa coefficient in overall performance test (Fig. 2a-d). [file 12864_2020_7223_MOESM13_ESM.xlsx]

## Sheet:  Average kappa
Average kappa coefficient and standard deviation in Fig 2a-d
Liver				Pancreas				HCC & ICCA				Arabidopsis root
tools	meankappa	std		tools	meankappa	std		tools	meankappa	std		tools	meankappa	std
Chetah	0.87	0.0156		Chetah	0.9	0.0096		Chetah	0.82	0.0099		Chetah	0.64	0.0088
Scmap-Cluster	0.68	0.0135		Scmap-Cluster	0.71	0.0149		Scmap-Cluster	0.22	0.0104		Scmap-Cluster	0.37	0.007
Scmap-Cell	0.57	0.0113		Scmap-Cell	0.84	0.0086		Scmap-Cell	0.58	0.0162		Scmap-Cell	0.48	0.0159
scPred	0.72	0.0293		scPred	0.87	0.0109		scPred	0.8	0.0139		scPred	0.42	0.0074
SVM	0.97	0.0028		SVM	0.98	0.0035		SVM	0.89	0.0068		SVM	0.88	0.0069
gcAnno-Bayes	0.92	0.01		gcAnno-Bayes	0.92	0.0138		gcAnno-Bayes	0.83	0.0066		gcAnno-Bayes	0.72	0.0118
gcAnno-SVM	0.96	0.0017		gcAnno-SVM	0.98	0.0029		gcAnno-SVM	0.89	0.0115		gcAnno-SVM	0.88	0.005

## Sheet: basic test result
The result of adaptability for 4 datasets( 5-fold cross validation, using kappa coefficient)
Liver			Pancreas			HCC & ICCA			Arabidopsis root
tools	kappa		tools	kappa		tools	kappa		tools	kappa
Chetah	0.861697		Chetah	0.888071		Chetah	0.833692		Chetah	0.625562
Scmap-Cluster	0.675205		Scmap-Cluster	0.698299		Scmap-Cluster	0.221066		Scmap-Cluster	0.365795
Scmap-Cell	0.567817		Scmap-Cell	0.83066		Scmap-Cell	0.597139		Scmap-Cell	0.496223
scPred	0.736638		scPred	0.852355		scPred	0.815438		scPred	0.414578
SVM	0.968282		SVM	0.974756		SVM	0.902585		SVM	0.880516
gcAnno-Bayes	0.907321		gcAnno-Bayes	0.908528		gcAnno-Bayes	0.825339		gcAnno-Bayes	0.706466
gcAnno-SVM	0.959246		gcAnno-SVM	0.981272		gcAnno-SVM	0.907738		gcAnno-SVM	0.888141
Chetah	0.872246		Chetah	0.913708		Chetah	0.809463		Chetah	0.633117
Scmap-Cluster	0.669786		Scmap-Cluster	0.731327		Scmap-Cluster	0.225917		Scmap-Cluster	0.363865
Scmap-Cell	0.562409		Scmap-Cell	0.846028		Scmap-Cell	0.57506		Scmap-Cell	0.470004
scPred	0.680037		scPred	0.880731		scPred	0.807779		scPred	0.413729
SVM	0.962836		SVM	0.981057		SVM	0.886814		SVM	0.88451
gcAnno-Bayes	0.926485		gcAnno-Bayes	0.901924		gcAnno-Bayes	0.82024		gcAnno-Bayes	0.721883
gcAnno-SVM	0.956882		gcAnno-SVM	0.986897		gcAnno-SVM	0.88186		gcAnno-SVM	0.882985
Chetah	0.881672		Chetah	0.899567		Chetah	0.830824		Chetah	0.646286
Scmap-Cluster	0.69145		Scmap-Cluster	0.694025		Scmap-Cluster	0.200212		Scmap-Cluster	0.377322
Scmap-Cell	0.585763		Scmap-Cell	0.843393		Scmap-Cell	0.566739		Scmap-Cell	0.478992
scPred	0.707949		scPred	0.863344		scPred	0.790735		scPred	0.41445
SVM	0.96714		SVM	0.971329		SVM	0.890606		SVM	0.866941
gcAnno-Bayes	0.927565		gcAnno-Bayes	0.936241		gcAnno-Bayes	0.835637		gcAnno-Bayes	0.731975
gcAnno-SVM	0.961138		gcAnno-SVM	0.979437		gcAnno-SVM	0.889417		gcAnno-SVM	0.886515
Chetah	0.898005		Chetah	0.907579		Chetah	0.828188		Chetah	0.645838
Scmap-Cluster	0.691422		Scmap-Cluster	0.714189		Scmap-Cluster	0.216686		Scmap-Cluster	0.376641
Scmap-Cell	0.569844		Scmap-Cell	0.839571		Scmap-Cell	0.602071		Scmap-Cell	0.501583
scPred	0.736601		scPred	0.859157		scPred	0.801774		scPred	0.43112
SVM	0.964037		SVM	0.976724		SVM	0.897783		SVM	0.872225
gcAnno-Bayes	0.929648		gcAnno-Bayes	0.926035		gcAnno-Bayes	0.835091		gcAnno-Bayes	0.730308
gcAnno-SVM	0.95808		gcAnno-SVM	0.984722		gcAnno-SVM	0.877545		gcAnno-SVM	0.884501
Chetah	0.860308		Chetah	0.900029		Chetah	0.819575		Chetah	0.635565
Scmap-Cluster	0.660889		Scmap-Cluster	0.715361		Scmap-Cluster	0.224364		Scmap-Cluster	0.363099
Scmap-Cell	0.58765		Scmap-Cell	0.854146		Scmap-Cell	0.570074		Scmap-Cell	0.465527
scPred	0.754651		scPred	0.870978		scPred	0.780281		scPred	0.421173
SVM	0.969415		SVM	0.975138		SVM	0.887831		SVM	0.874214
gcAnno-Bayes	0.932789		gcAnno-Bayes	0.912991		gcAnno-Bayes	0.826757		gcAnno-Bayes	0.709088
gcAnno-SVM	0.960265		gcAnno-SVM	0.982471		gcAnno-SVM	0.889254		gcAnno-SVM	0.875148
