# Supplementary material for: gCAnno: a graph-based single cell type annotation method
Source: BMC Genomics. 2020 Nov 23;21:823. doi: 10.1186/s12864-020-07223-4 (PMC7686723; doi:10.1186/s12864-020-07223-4)
Supplement: Supplementary file 19 — Additional file 19: Table S8. The statistic of kappa coefficient in cross platform test. [file 12864_2020_7223_MOESM19_ESM.xlsx]

## Sheet: different platforms test result
The result of different platform test
Liver
reference:mCel-seq2 query:10x			reference:10x query:mCel-seq2
tools	kappa		tools	kappa
Chetah	0.71319		Chetah	0.801977
Scmap-Cluster	0.319255		Scmap-Cluster	0.312773
Scmap-Cell	0.619484		Scmap-Cell	0.857306
scPred	0.642174		scPred	0.556496
SVM	-0.00904002		SVM	0.87518
gcAnno-Bayes	0.927298		gcAnno-Bayes	0.925197
gcAnno-SVM	0.73893		gcAnno-SVM	0.879098
Pancreas
reference:drop-seq query:smart-seq2			reference:smart-seq2 query:drop-seq
tools	kappa		tools	kappa
Chetah	0.838631		Chetah	0.313082
Scmap-Cluster	0.784599		Scmap-Cluster	0.476624
Scmap-Cell	0.712602		Scmap-Cell	0.863626
scPred	0.0310933		scPred	0.146306
SVM	0.878696		SVM	0.905038
gcAnno-Bayes	0.919799		gcAnno-Bayes	0.840486
gcAnno-SVM	0.900385		gcAnno-SVM	0.93927
